# Supplementary material for: Synthesis of chiral N-free sulfinamides by asymmetric condensation of stable sulfinates and ammonium salts
Source: Royal Society of Chemistry journal article supplement (doi:10.1039/d4cc06395c), 2025-01-01
Supplement: d4cc06395c1.pdf [file d4cc06395c1.pdf]

## **Synthesis of Chiral N-Free Sulfinamides by Asymmetric Condensation of Stable Sulfinates and Ammonium Salts**

Qin Xiong,<sup>1+</sup> Minghong Liao,<sup>1+</sup> Gangyu Wang,<sup>1</sup> Hai Shi,<sup>1</sup> Xingxing Wu<sup>1,\*</sup>

---

<sup>1</sup>State Key Laboratory of Green Pesticide, Fine Chemical Research and Development Center Guizhou University, Huaxi District, Guiyang 550025, China.

<sup>+</sup>These authors contributed equally to this work

<sup>\*</sup>Corresponding author. Email: [wuxx@gzu.edu.cn](mailto:wuxx@gzu.edu.cn)

## Table of Contents

|                                                                                                                      |            |
|----------------------------------------------------------------------------------------------------------------------|------------|
| <b>1. General information .....</b>                                                                                  | <b>3</b>   |
| <b>2. Experimental section .....</b>                                                                                 | <b>4</b>   |
| 2.1 Supplemental results for asymmetric sulfinylation of amine nucleophiles<br>reaction condition optimizations..... | 4          |
| 2.2 Typical procedure for preparation of sulfinate salts and racemic sulfinate amide<br>products.....                | 8          |
| 2.4 Synthetic transformations of sulfinamide products .....                                                          | 10         |
| 2.5 Preliminary mechanistic studies .....                                                                            | 17         |
| 2.6 Determination of the absolute configuration .....                                                                | 20         |
| <b>3. Characterizations of chiral sulfinyl amide products.....</b>                                                   | <b>25</b>  |
| 3.1 Characterization of chiral sulfinamides 4-5.....                                                                 | 25         |
| <b>4. References.....</b>                                                                                            | <b>53</b>  |
| <b>5. Copies of <sup>1</sup>H, <sup>19</sup>F and <sup>13</sup>C NMR.....</b>                                        | <b>55</b>  |
| <b>6. HPLC traces of the obtained chiral products .....</b>                                                          | <b>104</b> |

## 1. General information

Commercially available materials purchased from J&K or Aladdin were used as received. THF was distilled over sodium. Unless otherwise specified, all reactions were carried out under an atmosphere of nitrogen in 10.0 mL dry Schlenk tube. Proton nuclear magnetic resonance ( $^1\text{H}$  NMR) spectra were recorded on a Bruker (400 MHz) spectrometer or on a JEOL-ECX-500 (500 MHz) spectrometer. Chemical shifts were recorded in parts per million (ppm,  $\delta$ ) relative to tetramethylsilane ( $\delta = 0.00$ ) or chloroform ( $\delta = 7.26$ , singlet).  $^1\text{H}$  NMR splitting patterns are designated as singlet (s), doublet (d), triplet (t), quartet (q), dd (doublet of doublets); m (multiplets), and etc. All first-order splitting patterns were assigned on the basis of the appearance of the multiplet. Splitting patterns that could not be easily interpreted are designated as multiplet (m) or broad (br). Carbon nuclear magnetic resonance ( $^{13}\text{C}$  NMR) spectra were recorded on a Bruker (400 MHz) spectrometer. Fluorine ( $^{19}\text{F}$ ) nuclear magnetic resonance ( $^{19}\text{F}$  NMR) spectra were recorded on a Bruker (AVANCE III HD 376 MHz) spectrometer. The melting points (m.p.) of the title compounds were determined when left untouched on an XT-4-MP apparatus from Beijing Tech. Instrument Co. (Beijing, China). High resolution mass spectral analysis (HRMS) was performed on a quadrupole/electrostatic field orbitrap mass spectrometer. Absolute configuration of the products was determined by X-ray crystallography. HPLC analyses were measured on Waters systems with Empower 3 system controller, Alliance 2695, and 2998 Diode Array Waters 2489 UV/Vis detector. Chiralcel brand chiral columns from Daicel Chemical Industries were used with models IA, IB, IC, ID, IG, OD-H or OJ-H in 4.6 x 250 mm size. The racemic products used to determine the *er* values were synthesized using racemic catalyst. Optical rotations were measured on a Insmark IP-digi Polarimeter in a 1 dm cuvette at 25 °C. The concentration (c) is given in g/100 mL. Analytical thin-layer chromatography (TLC) was carried out pre-coated silica gel plate (0.2 mm thickness). Visualization was performed using a UV lamp.

## 2. Experimental section

### 2.1 Supplemental results for asymmetric sulfonylation of amine nucleophiles reaction condition optimizations

**Table S1.** Screening of catalysts<sup>a,b,c</sup>

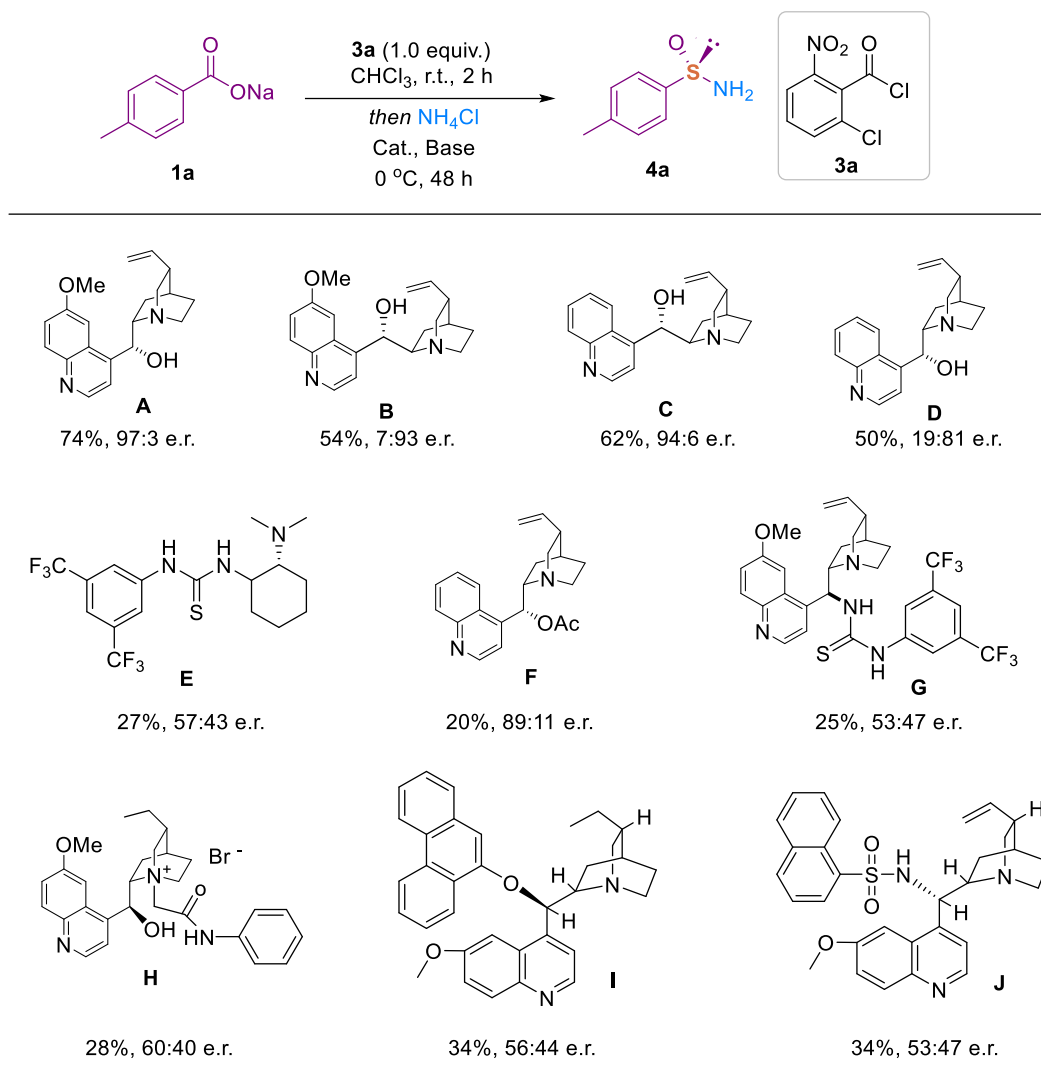

<sup>a</sup> Reaction conditions: sodium sulfinate **1a** (0.11 mmol, 1.1 equiv.), **3a** (0.1 mmol, 1.0 equiv.) in CHCl<sub>3</sub> (2.0 mL) at r.t. for 2 h, before reaction with Cat. (20 mol%), DIPEA (4.0 equiv.), NH<sub>4</sub>Cl (4.0 equiv.) at 0 °C for 48 h; <sup>b</sup> Isolated yields were reported based on **3a**; <sup>c</sup> er values were determined by chiral HPLC analysis.

**Table S2.** Screening of acid chloride **3**<sup>a,b,c</sup>

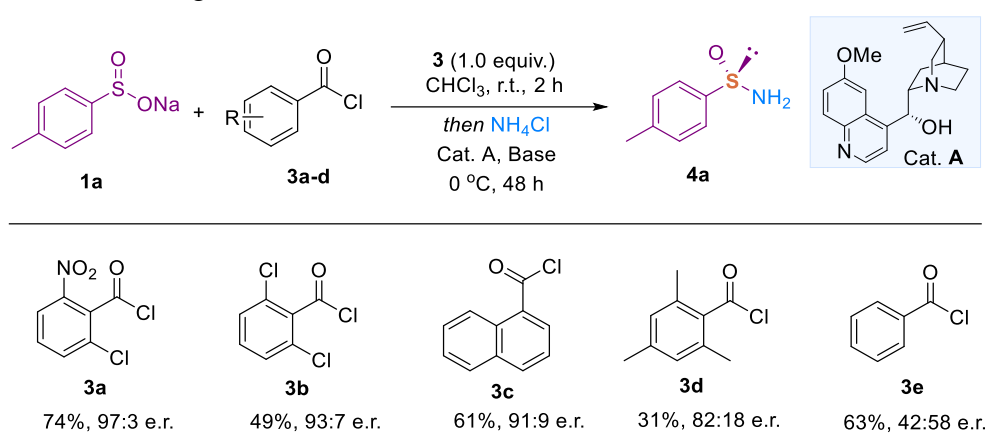

<sup>a</sup> Reaction conditions: sodium sulfinate **1a** (0.11 mmol, 1.1 equiv.), **3** (0.1 mmol, 1.0 equiv.) in  $\text{CHCl}_3$  (2.0 mL) at r.t. for 2 h, before reaction with Cat. A (20 mol%), DIPEA (4.0 equiv.),  $\text{NH}_4\text{Cl}$  (4.0 equiv.) at 0 °C for 48 h; <sup>b</sup> Isolated yields were reported based on **3**; <sup>c</sup> er values were determined by chiral HPLC analysis.

**Table S3.** Screening of solvents<sup>a,b,c</sup>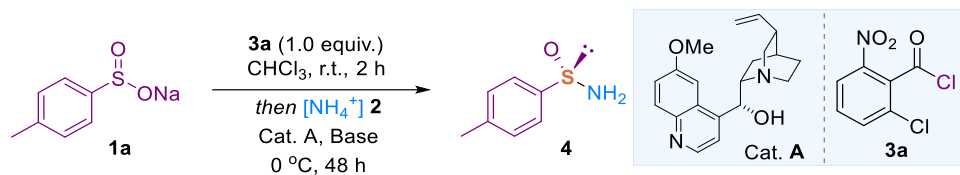

| Entry    | [NH <sub>4</sub> <sup>+</sup> ]                   | Base                            | Solvent                 | Temp. (°C) | Yield of <b>4a</b> (%) | E.r.        |
|----------|---------------------------------------------------|---------------------------------|-------------------------|------------|------------------------|-------------|
| 1        | NH <sub>4</sub> Cl                                | Rb <sub>2</sub> CO <sub>3</sub> | CHCl <sub>3</sub>       | 0          | 42                     | 96:4        |
| 2        | NH <sub>4</sub> Cl                                | K <sub>3</sub> PO <sub>3</sub>  | CHCl <sub>3</sub>       | 0          | 30                     | 40:60       |
| 3        | NH <sub>4</sub> Cl                                | DIPEA                           | CHCl <sub>3</sub>       | 0          | 68                     | 97:3        |
| 4        | NH <sub>4</sub> Cl                                | DIPEA                           | EA                      | 0          | 39                     | 49:51       |
| 5        | NH <sub>4</sub> Cl                                | DIPEA                           | toluene                 | 0          | 33                     | 47:53       |
| 6        | NH <sub>4</sub> Cl                                | DIPEA                           | DCM                     | 0          | 45                     | 96:4        |
| 7        | NH <sub>4</sub> Cl                                | DIPEA                           | DCE                     | 0          | 48                     | 96:4        |
| 8        | NH <sub>4</sub> Cl                                | DIPEA                           | THF                     | 0          | 56                     | 53:47       |
| <b>9</b> | <b>(NH<sub>4</sub>)<sub>2</sub>SO<sub>4</sub></b> | <b>DIPEA</b>                    | <b>CHCl<sub>3</sub></b> | <b>0</b>   | <b>74</b>              | <b>97:3</b> |
| 10       | (NH <sub>4</sub> ) <sub>2</sub> SO <sub>4</sub>   | DIPEA                           | CHCl <sub>3</sub>       | -20        | 63                     | 96:4        |
| 11       | (NH <sub>4</sub> ) <sub>2</sub> SO <sub>4</sub>   | DIPEA                           | CHCl <sub>3</sub>       | -10        | 64                     | 97:3        |
| 12       | (NH <sub>4</sub> ) <sub>2</sub> SO <sub>4</sub>   | DIPEA                           | CHCl <sub>3</sub>       | 25         | 74                     | 90:10       |

<sup>a</sup> Reaction conditions: sodium sulfinate **1a** (0.11 mmol, 1.1 equiv.), **3a** (0.1 mmol, 1.0 equiv.) in solvent (2.0 mL) at r.t. for 2 h, before reaction with Cat. **A** (20 mol%), base (4.0 equiv.), salt (4.0 equiv.) at 0 °C for 48 h; <sup>b</sup> Isolated yields were reported based on **3a**; <sup>c</sup> er values were determined by chiral HPLC analysis.

**Table S4.** Screening of the amount of used ammonium and base<sup>a,b,c</sup>

Reaction scheme: **1a** (sodium sulfinate) reacts with **3a** (1.0 equiv.) in  $\text{CHCl}_3$  at r.t. for 2 h, followed by  $(\text{NH}_4)_2\text{SO}_4$  (**2a**), Cat. A, Base, at  $0\text{ }^\circ\text{C}$  for 48 h, to yield **4** (sulfonamide). The structures of **Cat. A** and **3a** are shown in a blue box.

| Entry | equiv. $[\text{NH}_4^+]$ | equiv. (base) | Yield of <b>4a</b> (%) | E.r. |
|-------|--------------------------|---------------|------------------------|------|
| 1     | 1.0                      | 1.0           | 50                     | 93:7 |
| 2     | 2.0                      | 2.0           | 63                     | 96:4 |
| 3     | 4.0                      | 4.0           | 74                     | 97:3 |
| 4     | 6.0                      | 6.0           | 67                     | 97:3 |
| 5     | 8.0                      | 8.0           | 64                     | 95:5 |
| 6     | 10.0                     | 10.0          | 61                     | 94:6 |

<sup>a</sup> Reaction conditions: sodium sulfinate **1a** (0.11 mmol, 1.1 equiv.), **3a** (0.1 mmol, 1.0 equiv.) in  $\text{CHCl}_3$  (2.0 mL) at r.t. for 2 h, before reaction with Cat. A (20 mol%), DIPEA, salt at  $0\text{ }^\circ\text{C}$  for 48 h; <sup>b</sup> Isolated yields were reported based on **3a**; <sup>c</sup> er values were determined by chiral HPLC analysis.

## 2.2 Typical procedure for preparation of sulfinates salts and racemic sulfinamide products

**Scheme S1.** Preparation of sulfinates from sulfonyl chlorides **1**<sup>[1]</sup>

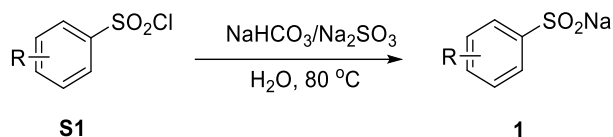

A mixture of sulfonyl chloride **S1** (2.0 mmol, 1.0 equiv.), sodium sulfite (4.0 mmol, 2.0 equiv.) and sodium bicarbonate (4.0 mmol, 2.0 equiv.) dissolved in water (10.0 mL) was heated at 80 °C for 4-6 h under N<sub>2</sub> atmosphere. After cooling to room temperature, water was removed under vacuum to give the solid residue. After extraction with ethanol and filtration, the resulted filtrate was concentrated to give the resulting sodium sulfinates, which was washed with Et<sub>2</sub>O (20.0 mL), collected by filtration, and dried under vacuum for 4 h to afford the starting material **1**.

### Synthesis of racemic sulfinamides 4-5

**Scheme S2.** General procedure for synthesis of racemic sulfinamide **4a-5c**<sup>[2]</sup>

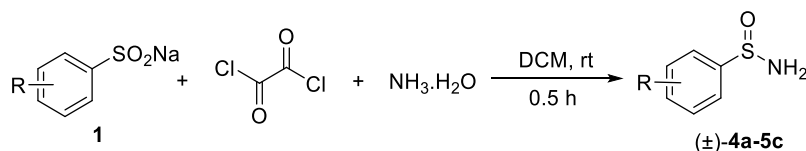

To a solution of sulfinates salt **1** (0.1 mmol), oxalyl chloride (0.11 mmol, 1.1 equiv.) in DCM (1.0 mL) was added ammonium hydroxide (0.15 mmol, 1.5 equiv.). The mixture was stirred at 0 °C for 30 min and then purified by flash chromatography (Petroleum ether / Ethyl acetate = 1:1) to afford the racemic sulfinamide **4a-5c**.



## 2.3 General procedure for catalytic enantioselective sulfinamide synthesis

Typical procedure for asymmetric synthesis of sulfinamide **4a-5c**

Asymmetric synthesis of sulfinamides (General Procedure A)

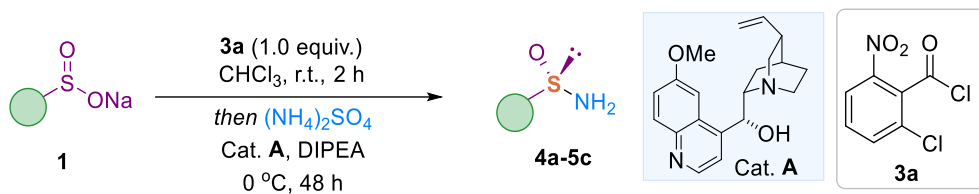

Under N<sub>2</sub> atmosphere, to an oven-dried 10.0 mL screw cap vial charged with a magnetic stirring bar was added **1** (0.11 mmol, 1.1 equiv.), **3a** (22.0 mg, 1.0 equiv.) in CHCl<sub>3</sub> (2.0 mL) at r.t. for 2 h, before reaction with Cat. **A** (6.49 mg, 0.02 mmol), DIPEA (69.67 mL, 4.0 equiv.), (NH<sub>4</sub>)<sub>2</sub>SO<sub>4</sub> (52.85 mg, 4.0 equiv.) at 0 °C for 48 h. After concentration *in vacuo*, the crude residue was purified by column chromatography on silica gel (Petroleum ether / Ethyl acetate = 5/1~1/1) to afford the desired sulfinamide product **4a-5c**.

## 2.4 Synthetic transformations of sulfinamide products

### Scheme S3. Preparation of **6** from **4a**<sup>[3]</sup>

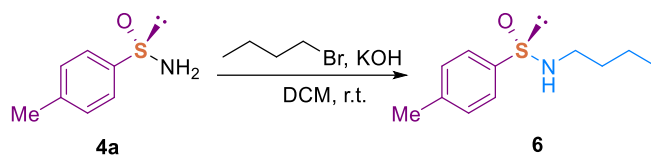

To a solution of **4a** (18.6 mg, 0.12 mmol, 1.2 equiv.) in THF (1.0 mL) was added  $n$ -butyl bromide (17.1 mg, 0.1 mmol, 1.0 equiv.) and potassium hydroxide (8.4 mg, 0.15 mmol, 1.5 equiv.). After stirring for 4 h, the reaction was quenched with saturated  $\text{NH}_4\text{Cl}$  aqueous solution and extracted with EtOAc. The combined organic layers were washed with brine and concentrated *in vacuo*. The residue was purified by column chromatography on silica gel to afford **6** (yellow oil, 13.7 mg, 78%, 96:4 e.r.).

### Scheme S4. Preparation of **7** from **4a**<sup>[3]</sup>

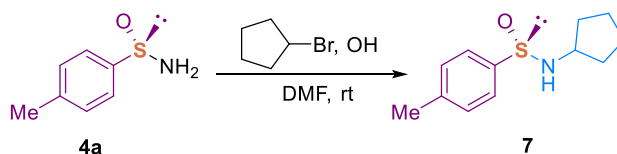

To a solution of **4a** (18.6 mg, 0.12 mmol, 1.2 equiv.) in THF (1.0 mL) was added cyclopentyl bromide (17.1 mg, 0.1 mmol, 1.0 equiv.) and potassium hydroxide (8.4 mg, 0.15 mmol, 1.5 equiv.). After stirring for 4 h, the reaction was quenched with saturated  $\text{NH}_4\text{Cl}$  aqueous solution and extracted with EtOAc. The combined organic layers were washed with brine and concentrated *in vacuo*. The residue was purified by column chromatography on silica gel to afford **7** (colorless oil, 13.9 mg, 75%, 96:4 e.r.).

### Scheme S5. Preparation of **8** from **4a**<sup>[3]</sup>

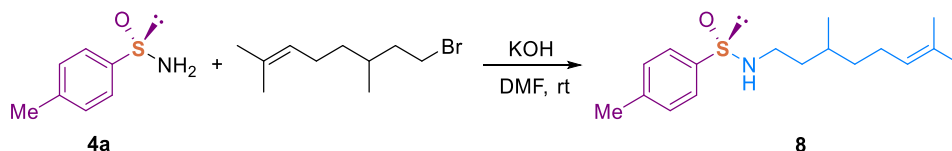

To a solution of **4a** (18.6 mg, 0.12 mmol, 1.2 equiv.) in THF (1.0 mL) was added 8-bromo-2,6-dimethyloct-2-ene (17.1 mg, 0.1 mmol, 1.0 equiv.) and potassium hydroxide (8.4 mg, 0.15 mmol, 1.5 equiv.). After stirring for 4 h, the reaction was quenched with saturated  $\text{NH}_4\text{Cl}$  aqueous solution and extracted with EtOAc. The

combined organic layers were washed with brine and concentrated in *vacuo*. The residue was purified by column chromatography on silica gel to afford **8** (yellow oil, 16.1 mg, 66%, 97:3 e.r.).

**Scheme S6.** Preparation of **9** from **4a**<sup>[4]</sup>

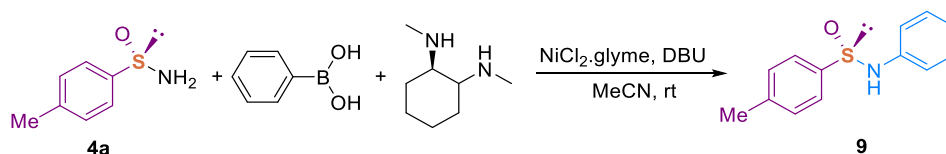

To a solution of  $\text{NiCl}_2 \cdot \text{glyme}$  (0.2 mmol, 0.2 equiv.) and *N*-2-dimethylcyclohexane-1,2-diamine (0.2 mmol, 0.2 equiv.) in MeCN (1.0 mL) was added DBU (2 mmol, 2.0 equiv.). Stir the mixture open to air at room temperature until the color of system has changed. Then sulfonamide **4a** (1.0 mmol, 1.0 equiv.) and aryl boronic acid (1.3 mmol, 1.3 equiv.) were successively added into the system. After stirring for several hours, the reaction was quenched with water and extracted with ethyl acetate for 3 times. Dry the combined organic phase over  $\text{Na}_2\text{SO}_4$  and concentrate *in vacuo*, then the resultant was purified by chromatography on silica gel (petroleum ether: ethyl acetate = 5:1) to afford **9** (white solid, 16.9 mg, 73%, 96:4 e.r.).

**Scheme S7.** Preparation of **10** from **4a**

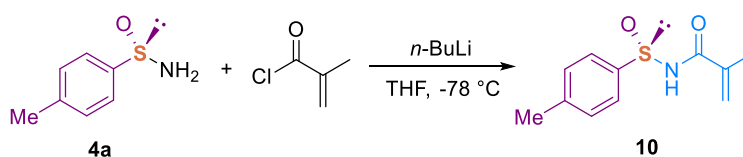

Under nitrogen, sulfonamide **4a** (1.0 mmol, 1.0 equiv.) was dissolved in THF (2.0 mL) and cooled to  $-78^\circ\text{C}$ , before an *n*-butyllithium (1.2 mmol, 1.2 equiv.) solution was added dropwise. After stirring for 20 minutes, the reaction was quenched with HCl (aq.) and extracted with ethyl acetate for 3 times. Dry the combined organic phase over  $\text{Na}_2\text{SO}_4$  and concentrate *in vacuo*, then the residue was purified by column chromatography on silica gel to afford **10** (colorless oil, 15.6 mg, 70%, 93:7 e.r.).

**Scheme S8.** Preparation of **11** from **4a**<sup>[5-6]</sup>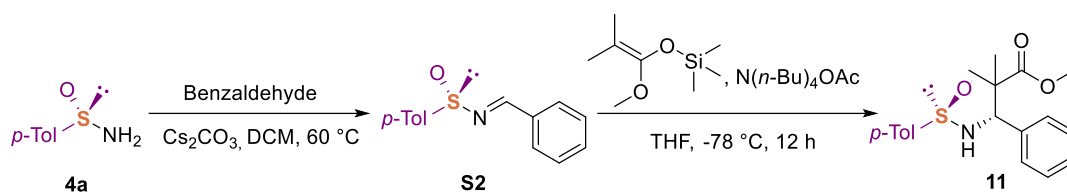

To a solution of **4a** (46.6 mg, 0.3 mmol, 1.0 equiv.) and benzaldehyde (31.7 mg, 0.3 mmol, 1.0 equiv.) in DCM (10.0 mL), was added pyrrolidine (2.1 mg, 0.03 mmol, 0.1 equiv.). The mixture was stirred in a sealed vial at 60 °C for 1 h. After concentration *in vacuo*, a residue was afforded and could be spin dried without further purification for the next step.

((1-methoxy-2-methylprop-1-en-1-yl)oxy)trimethylsilane (1.4 equiv.), **S2** (20.0 mg, 1.0 equiv.) and *N*(*n*-Bu)<sub>4</sub>OAc (10 mol%) in THF (2.0 mL) was stirred at -78 °C for 12 h. The residue was purified by column chromatography on silica gel to afford **11** (colorless oil, 37.6 mg, 80%, 93:7 e.r.), >5.6:1 dr (determined by HPLC).

**Scheme S9.** Preparation of **12-13** from **4a**<sup>[7]</sup>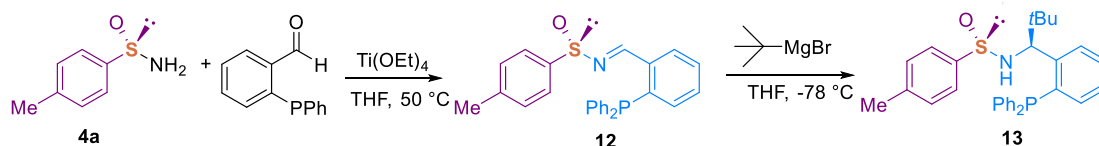

A solution of sulfinamide **4a** (0.32 mmol), 2-(diphenylphosphino)benzaldehyde (0.32 mmol) and Ti(OEt)<sub>4</sub> (0.15 ml, 0.64 mmol) in THF (1.3 ml) was stirred at 50 °C for 12 h. Purification of the product by chromatography (80/20 hexane/EtOAc) afforded the intermediate **12** (yellow solid, 53.0 mg, 53%, 94:6 e.r.).

Cool the solution of *N*-sulfinylimine **12** (0.12 mmol, 1.0 equiv.) in anhydrous THF (0.4 mL) to -78 °C, add *tert*-butyl magnesium chloride solution (1.5 equiv., 0.5 M in THF) dropwise to the mixture, allow the mixture to stir until complete by TLC (approximately 5 hours), quench the reaction with saturated aqueous ammonium chloride. Extract the reaction mixture three times with EtOAc, wash the combined organics with brine. Dry the combined organics with sodium sulfate. Concentrate the combined organics *in vacuo*. Purification of the product by column chromatography (petroleum ether: ethyl acetate = 5:1) afforded **13** as a white solid (37.1 mg, 70%, >20:1

dr (determined by  $^1\text{H}$  NMR)).

**Scheme S10.** Preparation of **14** from **4a**<sup>[8]</sup>

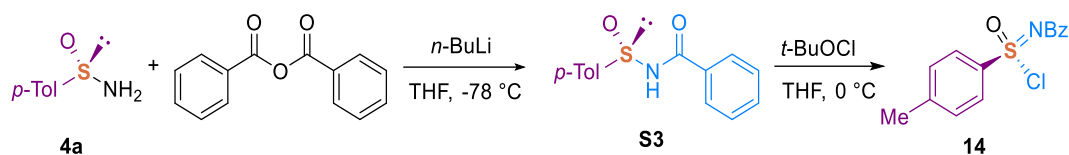

According to a published procedure,<sup>[8]</sup> **4a** (1.0 mmol, 1.0 equiv.) was dissolved in THF (14.0 mL) and cooled to  $-78\text{ }^\circ\text{C}$ . At this temperature,  $n\text{-BuLi}$  (1.6 M in  $n\text{-hexane}$ , 2.1 equiv.) was added slowly over a period of 5 min, followed by benzoic anhydride (1.2 equiv.) as a solid in one portion. The reaction was allowed to warm up to room temperature overnight. To the mixture was added a saturated aqueous solution of  $\text{NH}_4\text{Cl}$  (5.0 mL), extracted with EtOAc (3 x 30 mL), dried with brine and  $\text{Na}_2\text{SO}_4$ . The solvent was removed under reduced pressure and the crude product was purified by column chromatography ( $\text{CH}_2\text{Cl}_2/\text{MeOH} = 100:1$ ).

*tert*-Butyl hypochlorite (0.16 mL, 1.2 equiv.) was added dropwise to a solution of compound **S3** (0.3 g, 1.0 equiv.) in anhydrous THF (10.0 mL) at  $0\text{ }^\circ\text{C}$  under argon atmosphere. The mixture was stirred for 2 hours at  $0\text{ }^\circ\text{C}$ . After work-up, the residue was purified quickly through a flash column chromatography (5% ethyl acetate in hexane) to afford **14** (white solid, 0.18 g, 60%, 96:4 e.r.).

**Scheme S11.** Preparation of **15** from **4a**<sup>[8]</sup>

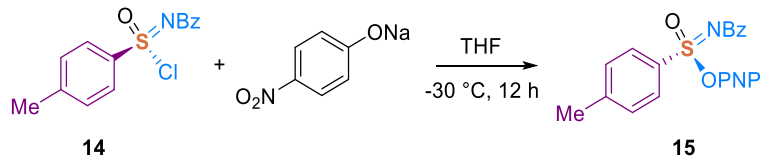

In a 25 mL vial containing a magnetic stir bar, was added sulfonimidoyl chloride **14** (0.1 mmol) and THF (2.0 mL). The mixture was cooled to  $-30\text{ }^\circ\text{C}$ . Then sodium phenoxide (0.15 mmol, 1.5 equiv.) was added quickly at this temperature. After stirring at  $-30\text{ }^\circ\text{C}$  for 12 h, the reaction mixture was concentrated. The desired product was isolated by column chromatography on silica gel (petroleum ether: ethyl acetate = 12/1 - 3/1) to afford **15** (white solid, 45.0 mg, 90%, 93:7 e.r.)

**Scheme S12.** Preparation of **16** from **4a**<sup>[8]</sup>

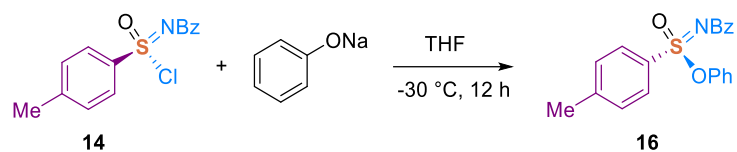

In a 25 mL vial containing a magnetic stir bar, was added sulfonimidoyl chloride **14** (0.1 mmol) and THF (2.0 mL). The mixture was cooled to -30 °C. Then the sodium phenoxide (0.15 mmol, 1.5 equiv.) was added quickly at this temperature. After stirring at -30 °C for 12 h, the reaction mixture was concentrated. The desired product was isolated by column chromatography on silica gel (petroleum ether: ethyl acetate = 12/1 - 3/1) to afford **16** (white solid, 19.5 mg, 65%, 96:4 e.r.).

**Scheme S13.** Preparation of **17** from **4a**<sup>[8]</sup>

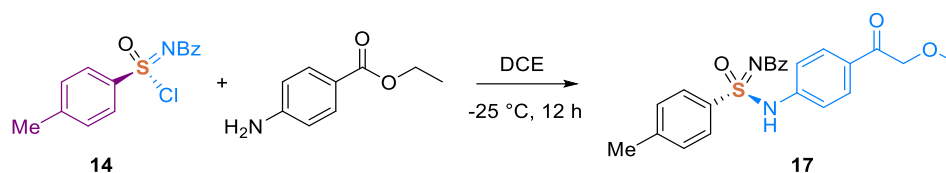

In a 10 mL vial containing a magnetic stir bar, was added sulfonimidoyl chlorides **14** (0.1 mmol) and 1,2-dichloroethane (2.0 mL). The mixture was cooled to -25 °C. Then the secondary amine (0.3 mmol, 3.0 equiv.) was added quickly at this temperature. After stirring at -25 °C for 12 h, the reaction mixture **17** was concentrated. The desired product was isolated by column chromatography on silica gel (petroleum ether: ethyl acetate = 9/1 - 1/1) to afford **17** (white solid, 16.5 mg, 55%, 95:5 e.r.).

**Scheme S14.** Preparation of **18** from **4a**<sup>[8]</sup>

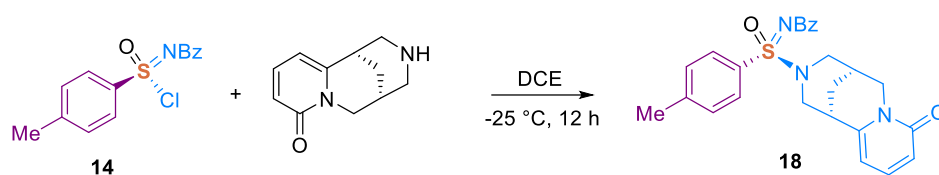

In a 10 mL vial containing a magnetic stir bar, was added sulfonimidoyl chlorides **14** (0.1 mmol) and 1,2-dichloroethane (2.0 mL). The mixture was cooled to -25 °C. Then the secondary amine (0.3 mmol, 3.0 equiv.) was added quickly at this temperature. After stirring at -25 °C for 12 h, the reaction mixture **18** was concentrated. The desired product was isolated by column chromatography on silica gel (petroleum ether: ethyl acetate = 5/1 - 0/1) to afford **18** (white solid, 21.3 mg, 71%, 95:5 e.r.).

**Scheme S15.** Preparation of **19** from **4a**<sup>[8]</sup>

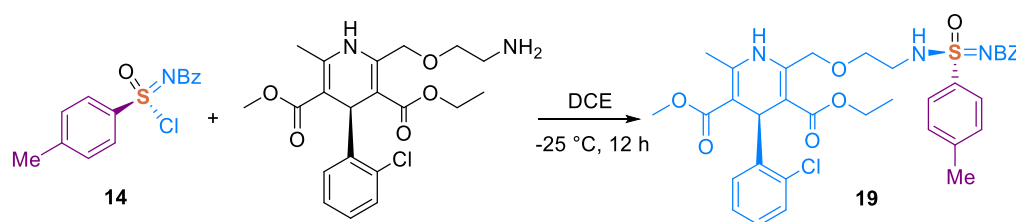

In a 10 mL vial containing a magnetic stir bar, was added sulfonimidoyl chlorides **14** (0.1 mmol) and 1,2-dichloroethane (2.0 mL). The mixture was cooled to -25 °C. Then the secondary amine (0.3 mmol, 3.0 equiv.) was added quickly at this temperature. After stirring at -25 °C for 12 h, the reaction mixture was concentrated. The desired product was isolated by column chromatography on silica gel (petroleum ether: ethyl acetate = 9/1 - 1/1) to afford **19** (white solid, 20.9 mg, 70%, 96:4 e.r.).

### Scheme S16. Amplification of reaction 4a

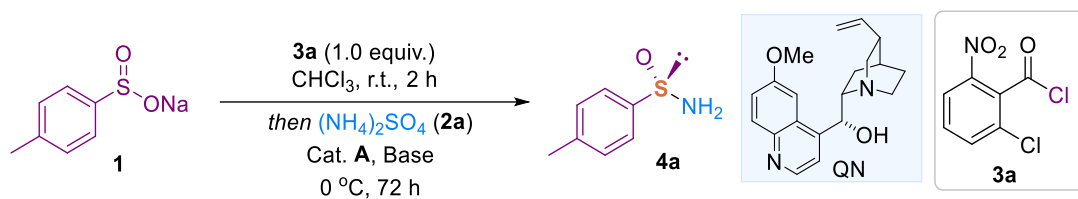

Under  $\text{N}_2$  atmosphere, to an oven-dried 10.0 mL screw cap vial charged with a magnetic stirring bar was added **1** (1.7 g, 1.1 equiv.), **3a** (2.15 g, 1.0 equiv.) in  $\text{CHCl}_3$  (100 mL) at r.t. for 2 h, before reaction with Cat. **A** (0.63 g, 0.02 mmol), DIPEA (6.8 mL, 4.0 equiv.),  $(\text{NH}_4)_2\text{SO}_4$  (5.2 g, 4.0 equiv.) at  $0\text{ }^\circ\text{C}$  for 72 h. After concentration *in vacuo*, the crude residue was purified by column chromatography on silica gel (petroleum ether: ethyl acetate = 5/1~1/1) to afford the desired sulfonamide product **4a** (white solid, 0.97 g, 74%, 97:3 e.r.).



## 2.5 Preliminary mechanistic studies

**Scheme S17.** Isolation of mixed anhydride intermediate **I** under the catalytic conditions

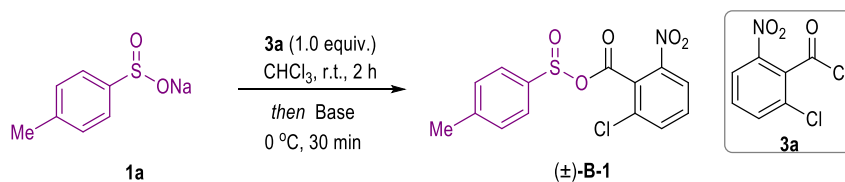

General procedure: Under nitrogen atmosphere, to a 10.0 mL dry Schlenk tube was added sodium *p*-toluenesulfonate (**1a**, 13.9 mg, 1.1 equiv.), 2-chloro-6-nitrobenzoyl chloride (**3a**, 20.0 mg, 1.0 equiv.) and  $\text{CHCl}_3$  (2.0 mL). The mixture was kept stirring at r.t. for 2 h, then the base DIPEA (63.3  $\mu\text{L}$ , 4 equiv.) was added and stirred at  $0^\circ\text{C}$  for 30 min. A quick separation with preparative TLC (20  $\times$  20 cm, Pentane: EA = 5:1,  $R_f$  = 0.2) could readily afford a white solid, which was confirmed to be the mixed anhydride **(±)-IA**.

### 2-Chloro-6-nitrobenzoic 4-methylbenzenesulfinic anhydride **(±)-IA**

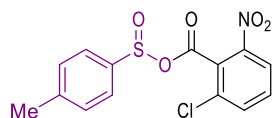

$^1\text{H NMR}$  (400 MHz,  $\text{CDCl}_3$ )  $\delta$  8.19 (d,  $J$  = 8.3 Hz, 1H), 7.83 (dd,  $J$  = 15.2, 8.2 Hz, 3H), 7.66 (t,  $J$  = 8.2 Hz, 1H), 7.37 (d,  $J$  = 8.1 Hz, 2H), 2.43 (s, 3H).

**HRMS** (ESI,  $m/z$ ): calculated for  $\text{C}_{14}\text{H}_{10}\text{O}_5\text{NSClNa}^+$  [ $\text{M}+\text{Na}$ ] $^+$ : 361.9860, found: 361.9850, 363.9824.

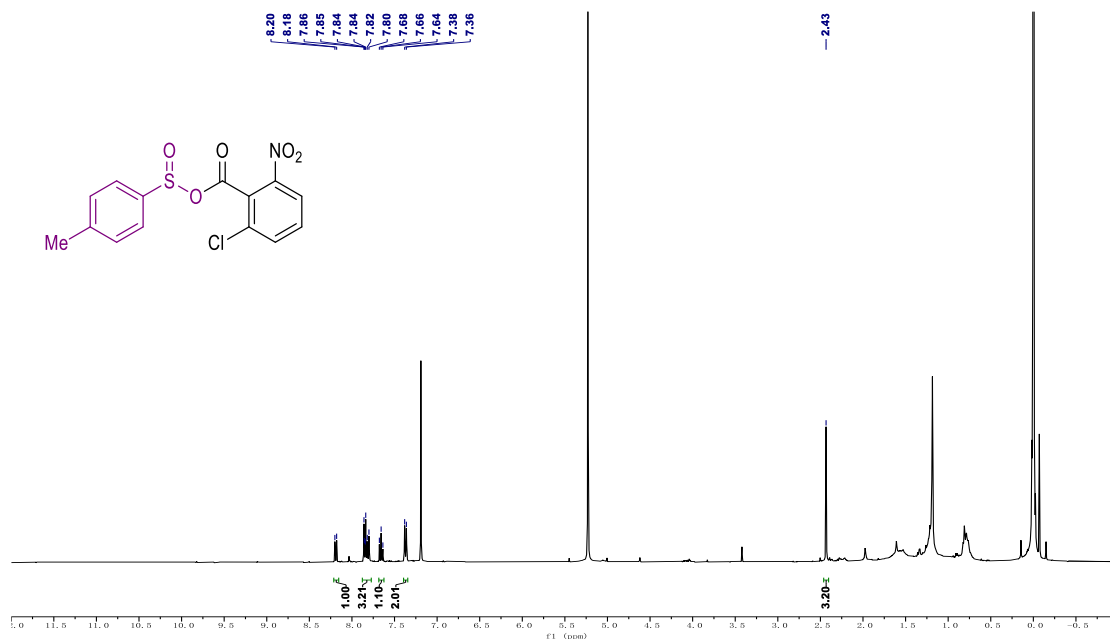

## HRMS of sulfinylammonium salt intermediate **IIA**

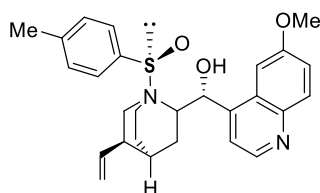

HRMS of *p*-tolyl derived-sulfinylammonium salt intermediate (ESI, *m/z*): calculated for  $C_{27}H_{31}N_2O_3S^+$   $[M]^+$ : 463.2050, found:463.2034.

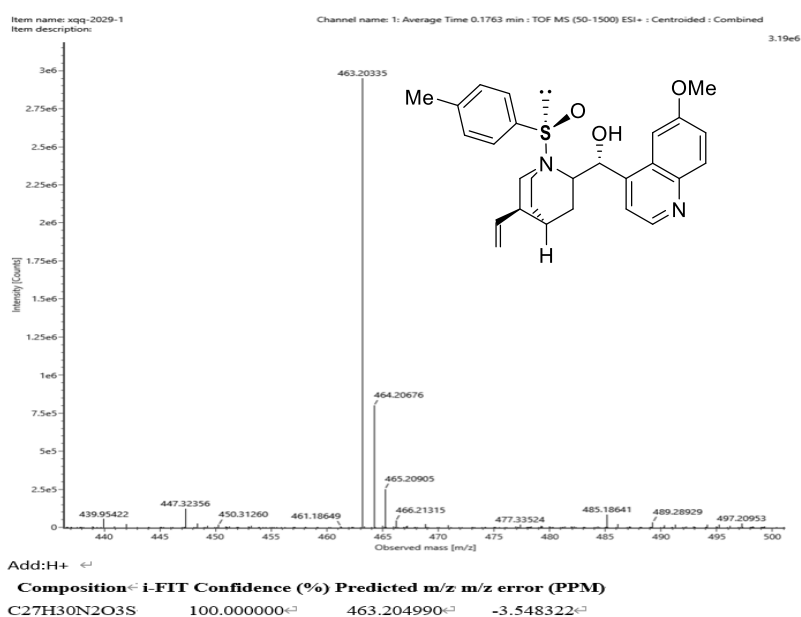

## Scheme S18. Plausible mechanism

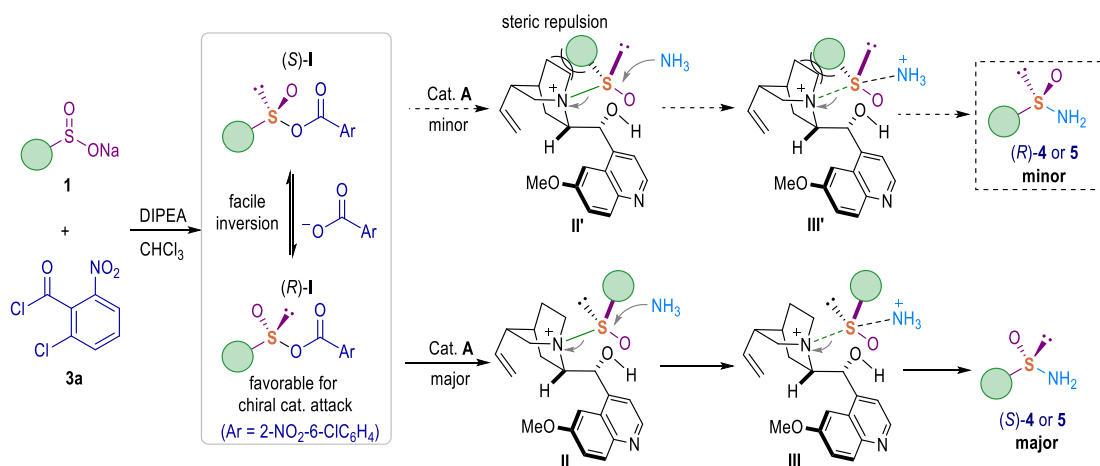

Built upon the preliminary mechanistic studies (Scheme S17), previous reports by us (*Chem.*, 2024, **10**, 1541 and *J. Am. Chem. Soc.* 2024, **146**, 25350.) and others by Tan, Shibata/Toru, Miller/Ellman, Senanayake,<sup>[9-17]</sup> a dynamic kinetic resolution process was rationally proposed to explain the stereochemical outcome obtained in our developed reaction, as illustrated in Scheme S18. First, the mixed anhydride ( $\pm$ )-**I** in racemic version was readily obtained from the sulfinate **1** and acyl chloride **3a**. Facile epimerization on the stereogenic sulfur center of anhydride ( $\pm$ )-**I** could be occurred under the assistance of benzoate anion. Chiral quinine catalyst Cat. **A** then underwent a stereoselective nucleophilic attack on the sulfur-center of the mixed anhydride **I** to form the key sulfinyl ammonium intermediate **II**. Subsequent S-N bond formation involving the approach of amine nucleophile from the back of S-N bond of intermediate **II** (via **III**) would afford the desired chiral product **4-5** and release the chiral catalyst **A** for the next catalytic cycle. An intermediate of **II** from catalyst addition of (*R*)-**I** was assumed to give rise to the product (*S*)-**4-5** in high enantioselectivity, considering the notable steric repulsion between the aryl/alkyl moiety of the sulfinyl and the catalyst backbone in intermediate **II'**.

## 2.6 Determination of the absolute configuration

### (a) Stereochemistry determination of 4a via X-ray crystallographic analysis

**Experimental.** Single white plate-shaped crystals of sulfinamide (*S*)-**4a** were recrystallized from slow diffusion of a dichloromethane solution. A suitable crystal with dimensions  $0.48 \times 0.35 \times 0.1 \text{ mm}^3$  was selected and the crystal was mounted on a mylar loop in perfluoroether oil on a STOE STADIVARI Cu diffractometer. The crystal was kept at a steady  $T = 150 \text{ K}$  during data collection. **CCDC 2288291** for (*S*)-**4a** contains the supplementary crystallographic data that can be obtained free of charge from The Cambridge Crystallographic Data Centre via [www.ccdc.cam.ac.uk/data\\_request/cif](http://www.ccdc.cam.ac.uk/data_request/cif).

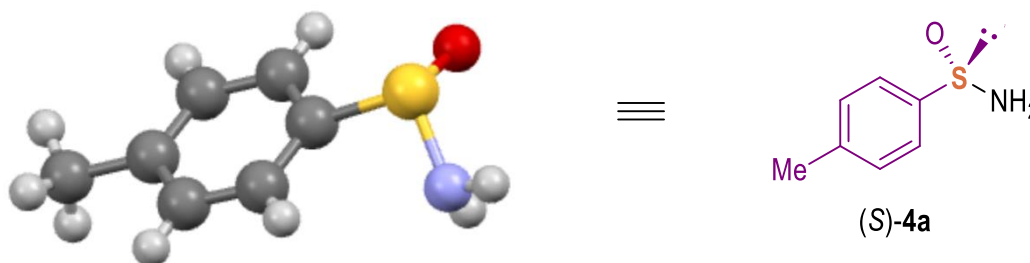

|                             |                                               |
|-----------------------------|-----------------------------------------------|
| <b>Compound</b>             | ( <i>S</i> )- <b>4a</b>                       |
| <b>Empirical formula</b>    | C <sub>7</sub> H <sub>9</sub> NOS             |
| <b>Formula weight</b>       | 155.21                                        |
| <b>Temperature/K</b>        | 293(2)                                        |
| <b>Crystal system</b>       | orthorhombic                                  |
| <b>Space group</b>          | P2 <sub>1</sub> 2 <sub>1</sub> 2 <sub>1</sub> |
| <b>a/Å</b>                  | 4.9512(6)                                     |
| <b>b/Å</b>                  | 6.4395(8)                                     |
| <b>c/Å</b>                  | 24.625(3)                                     |
| <b>α/°</b>                  | 90                                            |
| <b>β/°</b>                  | 90                                            |
| <b>γ/°</b>                  | 90                                            |
| <b>Volume/Å<sup>3</sup></b> | 785.11(16)                                    |

|                                                                 |                                                               |
|-----------------------------------------------------------------|---------------------------------------------------------------|
| <b>Z</b>                                                        | 4                                                             |
| $\rho_{\text{calc}}/\text{cm}^3$                                | 1.313                                                         |
| $\mu/\text{mm}^{-1}$                                            | 0.341                                                         |
| <b>F(000)</b>                                                   | 328.0                                                         |
| <b>Crystal size/mm<sup>3</sup></b>                              | 0.48 × 0.35 × 0.1                                             |
| <b>Radiation</b>                                                | MoK $\alpha$ ( $\lambda = 0.71073$ )                          |
| <b>2<math>\Theta</math> range for data collection/°</b>         | 6.54 to 50.012                                                |
| <b>Index ranges</b>                                             | $-5 \leq h \leq 5, -7 \leq k \leq 5, -29 \leq l \leq 26$      |
| <b>Reflections collected</b>                                    | 3718                                                          |
| <b>Independent reflections</b>                                  | 1374 [ $R_{\text{int}} = 0.1247, R_{\text{sigma}} = 0.0993$ ] |
| <b>Data/restraints/parameters</b>                               | 1374/0/93                                                     |
| <b>Goodness-of-fit on F<sup>2</sup></b>                         | 1.144                                                         |
| <b>Final R indexes [<math>I \geq 2\sigma(I)</math>]</b>         | $R_1 = 0.0676, wR_2 = 0.1703$                                 |
| <b>Final R indexes [all data]</b>                               | $R_1 = 0.0729, wR_2 = 0.1735$                                 |
| <b>Largest diff. peak/hole / e <math>\text{\AA}^{-3}</math></b> | 0.32/-0.37                                                    |
| <b>Flack parameter</b>                                          | 0.1(3)                                                        |

**(b) Further determination of the absolute configuration by literature comparison**

**4-Methylbenzenesulfinamide (4a)** (*R* and *S* configurations are purchased through purchase)

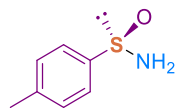

(*R*), 99:1 e.r.

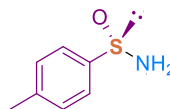

(*S*), 99:1 e.r.

lit:  $[\alpha]^{25}_D = -102.523$  ( $c = 0.3$  in  $\text{CHCl}_3$ ) for (*R*)

lit:  $[\alpha]^{25}_D = +87.054$  ( $c = 0.3$  in  $\text{CHCl}_3$ ) for (*S*)

(*R*)-4-Methylbenzenesulfinamide (commercially available):

$[\alpha]^{25}_D = -102.523$  ( $c = 0.3$  in  $\text{CHCl}_3$ );

Chiralcel IA (*i*-PrOH/*n*-Hexane = 10/90, 1.0 mL/min, 254 nm, 25 °C), 9.1 min, 10.7 min (major), 99:1 e.r.

(*S*)-4-Methylbenzenesulfinamide (commercially available):

$[\alpha]^{25}_D = +87.054$  ( $c = 0.3$  in  $\text{CHCl}_3$ );

Chiralcel IA (*i*-PrOH/*n*-Hexane = 10/90, 1.0 mL/min, 254 nm, 25 °C), 9.0 min (major), 10.9 min, 99:1 e.r.

Optically enriched **4a** prepared by our catalytic method:

(*S*)-4-Methylbenzenesulfinamide:

$[\alpha]^{25}_D = +62.717$  ( $c = 0.2$  in  $\text{CHCl}_3$ );

Chiralcel IA (*i*-PrOH/*n*-Hexane = 10/90, 1.0 mL/min, 254 nm, 25 °C), 9.1 min (major), 10.9 min, 97:3 e.r.

Comparison of HPLC traces

| 4-Methylbenzenesulfinamide | 4-Methylbenzenesulfinamide<br>(prepared by our catalytic method) |
|----------------------------|------------------------------------------------------------------|
|                            |                                                                  |

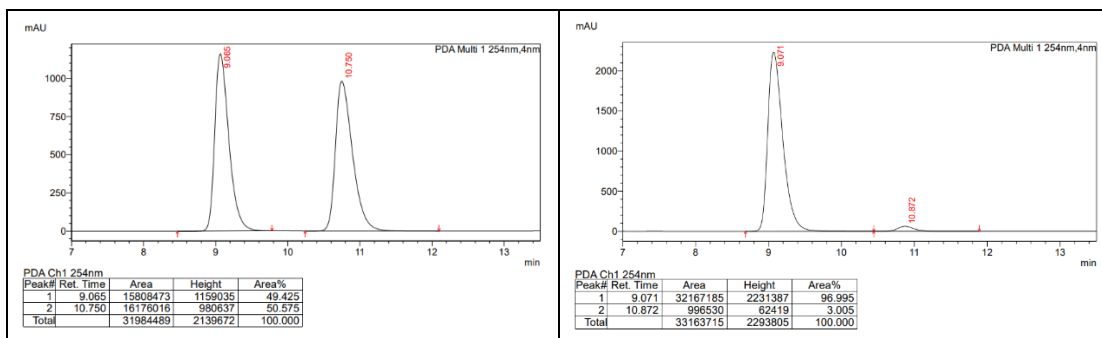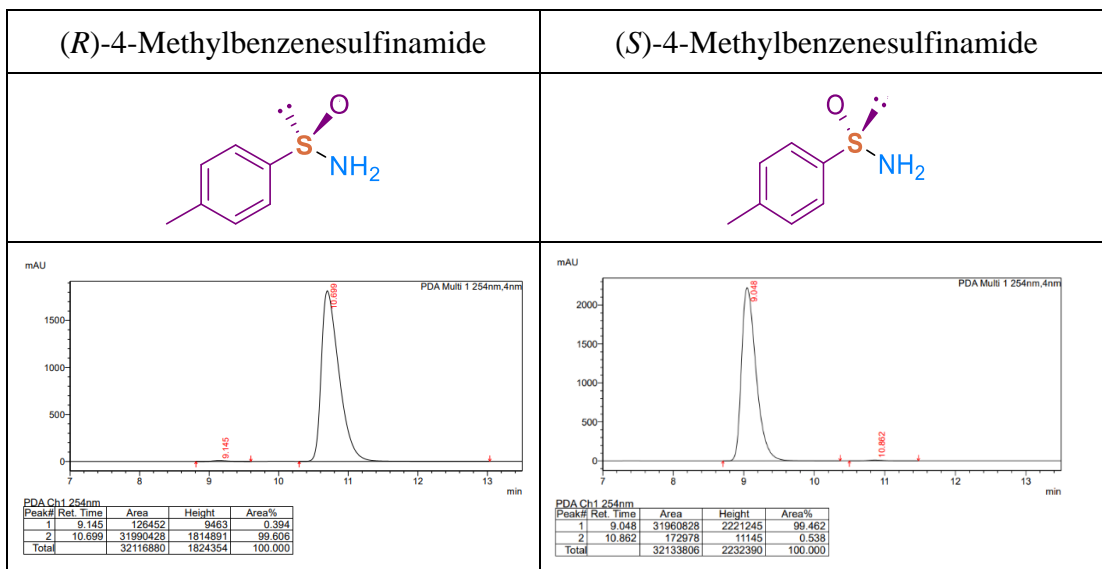

By comparing the optical rotation and HPLC trace, it can be inferred that the absolute configuration of **4a** was (*S*).

#### 4-Chlorobenzenesulfonamide (**4h**)

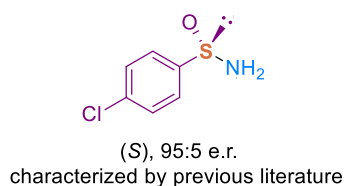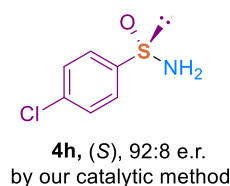

(*S*)-4-Chlorobenzenesulfonamide characterized by previous literature<sup>[9]</sup>

Chiralcel IB (*i*-PrOH/*n*-Hexane = 20/80, 1.0 mL/min, 254 nm, 25 °C), 6.4 min, 7.7 min (major), 95:5 e.r.

Optically enriched **4h** prepared by our catalytic method:

Chiralcel IB (*i*-PrOH/*n*-Hexane = 20/80, 1.0 mL/min, 254 nm, 25 °C), 8.0 min, 10.6 min (major), 92:8 e.r.

By comparing the optical rotation and HPLC trace, it can be inferred that the absolute

configuration of **4h** was (*S*).

#### 4-Iodobenzenesulfinamide (**4h**)

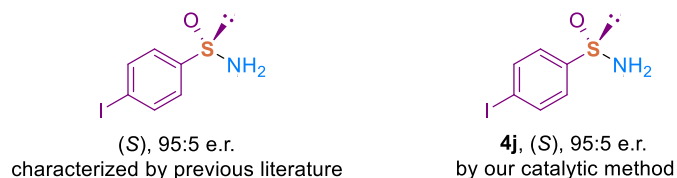

(*S*)-4-Iodobenzenesulfinamide characterized by previous literature<sup>[9]</sup>

Chiralcel IB (*i*-PrOH/*n*-Hexane = 10/90, 1.0 mL/min, 254 nm, 25 °C), 7.8 min, 10.5 min (major), 95:5 e.r.

Optically enriched **4j** prepared by our catalytic method:

Chiralcel IB (*i*-PrOH/*n*-Hexane = 10/90, 1.0 mL/min, 254 nm, 25 °C), 6.6 min, 8.8 min (major), 95:5 e.r.

By comparing the optical rotation and HPLC trace, it can be inferred that the absolute configuration of **4j** was (*S*).

#### (*S*)-4-Methyl-*N*-phenylbenzenesulfinamide (**9**)

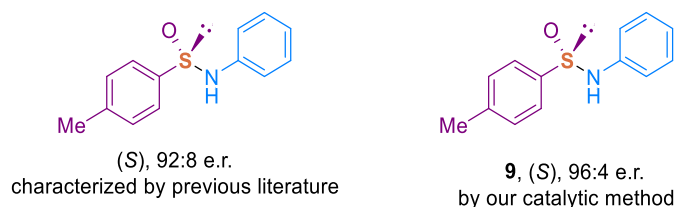

(*S*)-4-Methyl-*N*-phenylbenzenesulfinamide characterized by previous literature:<sup>[11]</sup>

Chiralcel ID (*i*-PrOH/*n*-Hexane = 20/80, 1.0 mL/min, 254 nm, 25 °C), 11.4 min, 14.0 min (major), 92:8 e.r.

$[\alpha]^{25}_D = +217.7$  (*c* = 0.5 in EtOAc).

Optically enriched **9** prepared by our catalytic method:

Chiralcel ID (*i*-PrOH/*n*-Hexane = 20/80, 1.0 mL/min, 254 nm, 25 °C), 13.1 min (major), 15.9 min, 96:4 e.r.

$[\alpha]^{25}_D = +97.253$  (*c* = 0.2 in CHCl<sub>3</sub>).

By comparing the optical rotation and HPLC trace, it can be inferred that the absolute configuration of **9** was (*S*).



### 3. Characterizations of chiral sulfinyl amide products

#### 3.1 Characterization of chiral sulfinamides 4-5

##### (*S*)-4-Methylbenzenesulfinamide (**4a**)

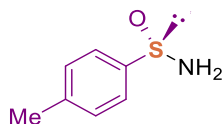

Prepared according to general procedure A. Flash column chromatography (Petroleum ether / Ethyl acetate = 3:1) yielded the title compound **4a**, faint yellow solid (11.64 mg, 75% yield);  $R_f$  0.25 (Petroleum ether / Ethyl acetate = 1:1); m.p. 114.4 – 115.7 °C.

$^1\text{H NMR}$  (400 MHz,  $\text{CDCl}_3$ )  $\delta$  7.51 (d,  $J = 8.20$  Hz, 2H), 7.19 (d,  $J = 7.80$  Hz, 2H), 4.60 (s, 2H), 2.32 (s, 3H).

$^{13}\text{C NMR}$  (101 MHz,  $\text{CDCl}_3$ )  $\delta$  142.4, 140.3, 128.5, 124.4, 20.3 ppm.

**HRMS** (ESI,  $m/z$ ): Calculated for  $\text{C}_7\text{H}_{10}\text{NOS}^+ [\text{M} + \text{H}]^+$ : 156.0478, found: 156.0480.

$[\alpha]_D^{25} = +37.717$  ( $c = 0.2$ , in  $\text{CHCl}_3$ ).

**HPLC** analysis: 97:3 e.r. (Chiralcel IA, 15:85 *i*-PrOH/*n*-Hexane, 1.0 mL/min),  $R_t$  (major) = 11.4 min,  $R_t$  (minor) = 12.8 min.

\*\* Reaction with quinidine catalyst, HPLC analysis: 5:95 e.r. (Chiralcel IA, 20:80 *i*-PrOH/*n* Hexane, 1.0 mL/min),  $R_t$  (major) = 9.3 min,  $R_t$  (minor) = 11.2 min.

##### $^{15}\text{N}$ -**4a**

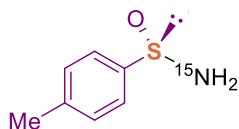

$^1\text{H NMR}$  (400 MHz,  $\text{CDCl}_3$ )  $\delta$  7.57 (d,  $J = 8.2$  Hz, 2H), 7.25 (d,  $J = 8.0$  Hz, 2H), 4.26 (s, 1H), 4.07 (s, 1H), 2.35 (s, 3H).

**HRMS** (ESI,  $m/z$ ): Calculated for  $\text{C}_7\text{H}_9^{15}\text{NOS Na}^+ [\text{M} + \text{Na}]^+$ : 179.0267, found: 179.0272.

**HPLC** analysis: 97:3 e.r. (Chiralcel IA, 20:80 *i*-PrOH/*n*-Hexane, 1.0 mL/min),  $R_t$  (major) = 6.7 min,  $R_t$  (minor) = 7.6 min.

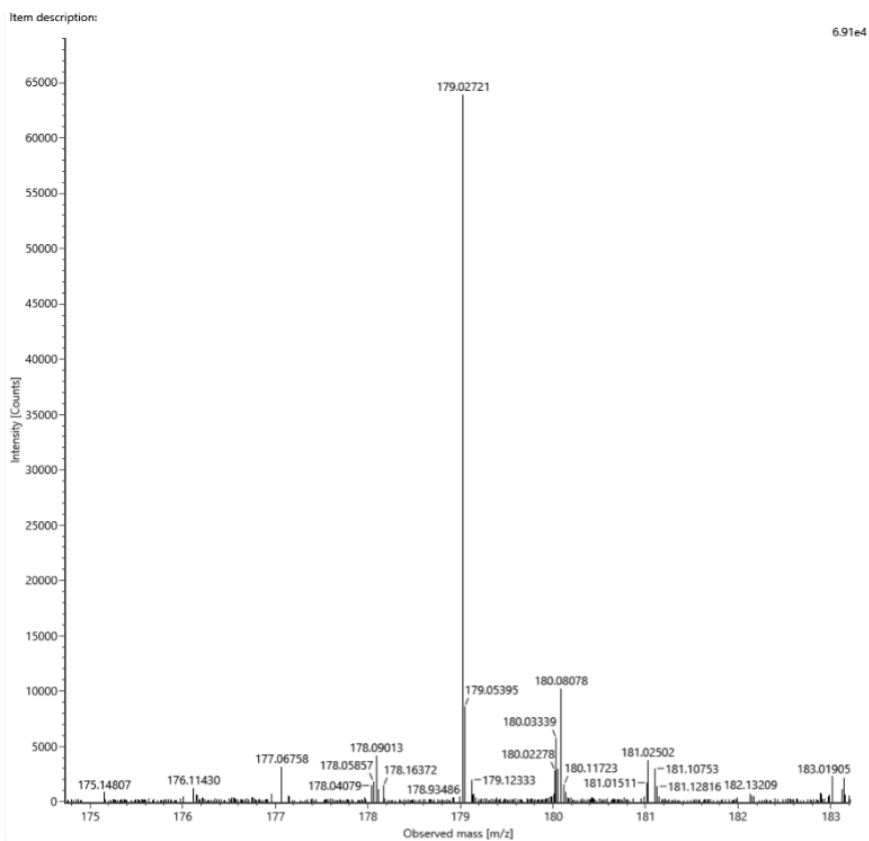

**(S)-Benzenesulfinamide (4b):**

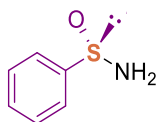

Prepared according to general procedure A. Flash column chromatography (Petroleum ether / Ethyl acetate = 3:1) yielded the title compound **4b**, faint yellow solid (10.17 mg, 72% yield);  $R_f$  0.25 (Petroleum ether / Ethyl acetate = 1:1); m.p. 107.8 – 109.2 °C.

$^1\text{H NMR}$  (400 MHz,  $\text{CDCl}_3$ )  $\delta$  7.88 – 7.59 (m, 2H), 7.51 – 7.38 (m, 3H), 4.47 (s, 2H).

$^{13}\text{C NMR}$  (101 MHz,  $\text{CDCl}_3$ )  $\delta$  146.5, 131.1, 128.9, 125.5 ppm.

**HRMS** (ESI, m/z): Calculated for  $\text{C}_6\text{H}_7\text{NOSNa}^+$   $[\text{M} + \text{Na}]^+$ : 164.0141, found: 163.0155.

$[\alpha]_D^{25} = +18.689$  (c = 0.2, in  $\text{CHCl}_3$ ).

**HPLC** analysis: 95:5 e.r. (Chiralcel OJ-H, 10:90 *i*-PrOH/*n*-Hexane, 1.0 mL/min),  $R_t$  (minor) = 11.4 min,  $R_t$  (major) = 14.5 min.

### (S)-4-Isopropylbenzenesulfonamide (4c)

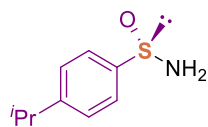

Prepared according to general procedure A. Flash column chromatography (Petroleum ether / Ethyl acetate = 3:1) yielded the title compound **4c**, faint yellow solid (13.9 mg, 76% yield);  $R_f$  0.25 (Petroleum ether / Ethyl acetate = 1:1); m.p. 128.5 – 129.1 °C.

$^1\text{H NMR}$  (400 MHz,  $\text{CDCl}_3$ )  $\delta$  7.63 – 7.54 (m, 2H), 7.32 – 7.26 (m, 2H), 4.32 (s, 2H), 2.90 (p,  $J = 6.9$  Hz, 1H), 1.20 (d,  $J = 6.9$  Hz, 6H).

$^{13}\text{C NMR}$  (101 MHz,  $\text{CDCl}_3$ )  $\delta$  152.4, 143.7, 127.1, 125.5, 34.1, 23.8 ppm.

$[\alpha]_D^{25} = +3.002$  ( $c = 0.5$ , in  $\text{CHCl}_3$ ).

**HRMS** (ESI,  $m/z$ ): Calculated for  $\text{C}_9\text{H}_{13}\text{NOSNa}^+$   $[\text{M} + \text{Na}]^+$ : 206.0610, found: 206.0607.

**HPLC** analysis: 92:8 e.r. (Chiralcel IB, 20:80 *i*-PrOH/*n*-Hexane, 1.0 mL/min),  $R_t$  (minor) = 6.0 min,  $R_t$  (major) = 6.8 min.

### (S)-4-tert-Butylbenzenesulfonamide (4d)

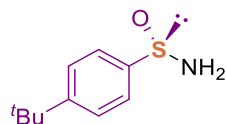

Prepared according to general procedure A. Flash column chromatography (Petroleum ether / Ethyl acetate = 3:1) yielded the title compound **4d**, faint yellow solid (13.8 mg, 70% yield);  $R_f$  0.25 (Petroleum ether / Ethyl acetate = 1:1); m.p. 114.5 – 116.0 °C.

$^1\text{H NMR}$  (400 MHz,  $\text{DMSO-}d_6$ )  $\delta$  8.54 – 6.96 (m, 4H), 6.18 (s, 2H), 1.30 (s, 9H).

$^{13}\text{C NMR}$  (101 MHz,  $\text{DMSO-}d_6$ )  $\delta$  153.5, 145.7, 126.0, 125.7, 35.0, 31.5 ppm.

**HRMS** (ESI,  $m/z$ ): Calculated for  $\text{C}_{10}\text{H}_{15}\text{NOSNa}^+$   $[\text{M} + \text{Na}]^+$ : 220.0767, found: 220.0766.

$[\alpha]_D^{25} = +5.340$  ( $c = 0.5$ , in  $\text{CHCl}_3$ ).

**HPLC** analysis: 93:7 e.r. (Chiralcel IB, 20:80 *i*-PrOH/*n*-Hexane, 1.0 mL/min),  $R_t$  (minor) = 8.0 min,  $R_t$  (major) = 10.9 min.

**(S)-[1,1'-Biphenyl]-4-sulfonamide (4e)**

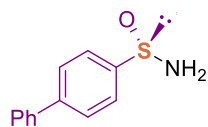

Prepared according to general procedure A. Flash column chromatography (Petroleum ether / Ethyl acetate = 3:1) yielded the title compound **4e**, faint yellow solid (15.4 mg, 71% yield);  $R_f$  0.25 (Petroleum ether / Ethyl acetate = 1:1); m.p. 138.4 – 140.3 °C.

$^1\text{H NMR}$  (400 MHz, DMSO- $d_6$ )  $\delta$  7.78 (dd,  $J = 8.2, 1.6$  Hz, 2H), 7.70 – 7.64 (m, 4H), 7.48 – 7.40 (m, 2H), 7.38 – 7.34 (m, 1H), 6.26 (s, 2H).

$^{13}\text{C NMR}$  (101 MHz, DMSO- $d_6$ )  $\delta$  147.6, 142.5, 139.7, 129.5, 128.5, 127.4, 127.4, 126.5 ppm.

**HRMS** (ESI,  $m/z$ ): Calculated for  $\text{C}_{12}\text{H}_{11}\text{NOSNa}^+$  [ $\text{M} + \text{Na}$ ] $^+$ : 240.0454, found: 240.0444.

$[\alpha]_D^{25} = +71.089$  ( $c = 0.2$ , in  $\text{CHCl}_3$ ).

**HPLC** analysis: 97:3 e.r. (Chiralcel IB, 20:80 *i*-PrOH/*n*-Hexane, 1.0 mL/min),  $R_t$  (minor) = 6.7 min,  $R_t$  (major) = 7.0 min.

**$^{15}\text{N}$ -4e**

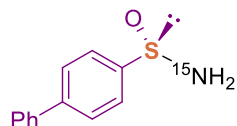

$^1\text{H NMR}$  (400 MHz,  $\text{CDCl}_3$ )  $\delta$  7.76 (d,  $J = 8.4$  Hz, 2H), 7.66 (d,  $J = 8.4$  Hz, 2H), 7.55 (d,  $J = 7.7$  Hz, 2H), 7.41 (t,  $J = 7.5$  Hz, 2H), 7.34 (d,  $J = 7.3$  Hz, 1H), 4.34 (s, 1H), 4.15 (s, 1H).

**HRMS** (ESI,  $m/z$ ): Calculated for  $\text{C}_{12}\text{H}_{11}^{15}\text{NOS Na}^+$  [ $\text{M} + \text{Na}$ ] $^+$ : 241.0424, found: 241.0417.

**HPLC** analysis: 97:3 e.r. (Chiralcel IB, 20:80 *i*-PrOH/*n*-Hexane, 1.0 mL/min),  $R_t$  (minor) = 5.3 min,  $R_t$  (major) = 5.9 min.

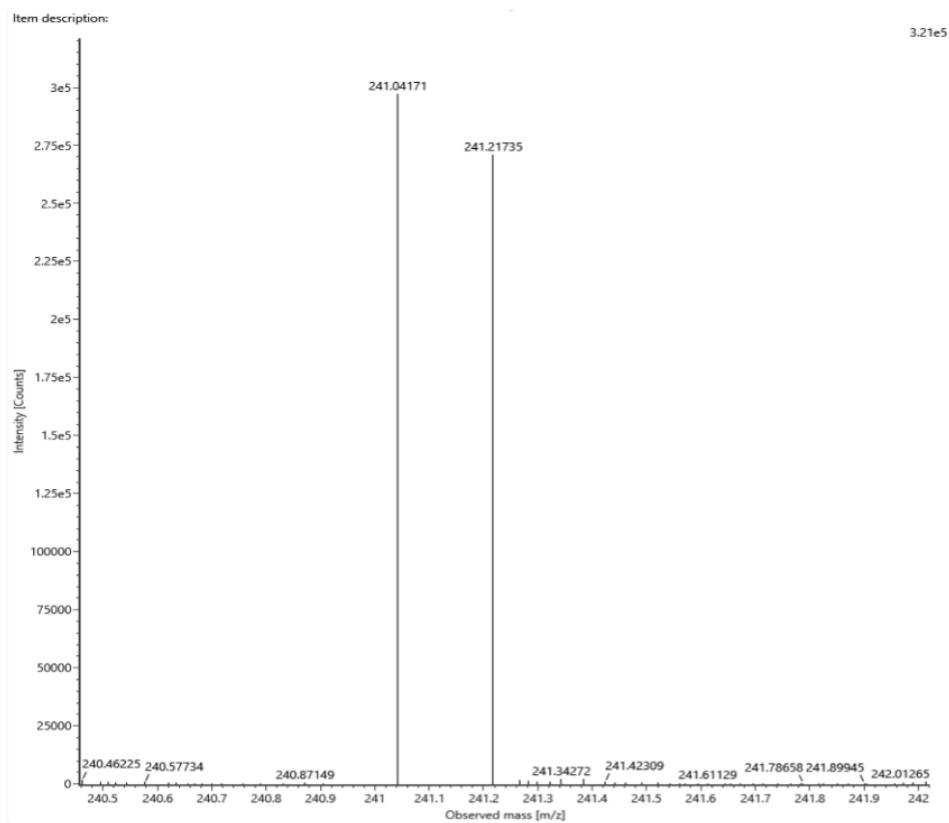

### (S)-4-Methoxybenzenesulfonamide (**4f**)

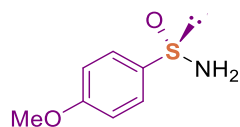

Prepared according to general procedure A. Flash column chromatography (Petroleum ether / Ethyl acetate = 3:1) yielded the title compound **4f**, faint yellow solid (12.7 mg, 74% yield);  $R_f$  0.25 (Petroleum ether / Ethyl acetate = 1:1); m.p. 136.7 – 137.2 °C.

$^1\text{H NMR}$  (400 MHz,  $\text{DMSO-}d_6$ )  $\delta$  8.08 – 7.44 (m, 2H), 7.30 – 6.78 (m, 2H), 6.13 (s, 2H), 3.80 (s, 3H).

$^{13}\text{C NMR}$  (101 MHz,  $\text{DMSO-}d_6$ )  $\delta$  161.3, 140.1, 127.5, 114.5, 55.9 ppm.

**HRMS** (ESI, m/z): Calculated for  $\text{C}_7\text{H}_9\text{NOSNa}^+$   $[\text{M} + \text{Na}]^+$ : 194.0246, found: 194.02036.

$[\alpha]_D^{25} = +20.692$  (c = 0.5, in  $\text{CHCl}_3$ ).

**HPLC** analysis: 93:7 e.r. (Chiralcel IA, 10:90 *i*-PrOH/*n*-Hexane, 1.0 mL/min),  $R_t$  (major) = 12.6 min,  $R_t$  (minor) = 14.6 min.

### (S)-4-Fluorobenzenesulfinamide (4g)

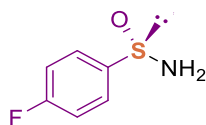

Prepared according to general procedure A. Flash column chromatography (Petroleum ether / Ethyl acetate = 3:1) yielded the title compound **4g**, faint yellow solid (12.9 mg, 81% yield);  $R_f$  0.25 (Petroleum ether / Ethyl acetate = 1:1); m.p. 120.1 – 122.4 °C.

$^1\text{H NMR}$  (400 MHz, DMSO- $d_6$ )  $\delta$  7.84 – 7.55 (m, 2H), 7.41 – 7.27 (m, 2H), 6.31 (s, 2H).

$^{13}\text{C NMR}$  (101 MHz, DMSO- $d_6$ )  $\delta$  163.7 (d,  $J = 247.2$  Hz), 144.6 (d,  $J = 2.9$  Hz), 128.4 (d,  $J = 9.0$  Hz), 116.1 (d,  $J = 22.3$  Hz) ppm.

$^{19}\text{F NMR}$  (377 MHz, DMSO- $d_6$ )  $\delta$  -111.4 ppm.

**HRMS** (ESI, m/z): Calculated for  $\text{C}_6\text{H}_7\text{FNOS}^+$  [ $\text{M} + \text{H}$ ] $^+$ : 160.0227, found: 160.0223.

$[\alpha]_D^{25} = +14.352$  (c = 0.5, in  $\text{CHCl}_3$ ).

**HPLC** analysis: 95:5 e.r. (Chiralcel IB, 20:80 *i*-PrOH/*n*-Hexane, 1.0 mL/min),  $R_t$  (minor) = 7.8 min,  $R_t$  (major) = 9.2 min.

### (S)-4-Chlorobenzenesulfinamide (4h)

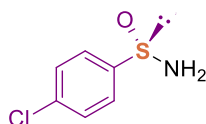

Prepared according to general procedure A. Flash column chromatography (Petroleum ether / Ethyl acetate = 3:1) yielded the title compound **4h**, faint yellow solid (13.7 mg, 78% yield);  $R_f$  0.25 (Petroleum ether / Ethyl acetate = 1:1); m.p. 122.4 – 123.7 °C.

$^1\text{H NMR}$  (400 MHz, DMSO- $d_6$ )  $\delta$  7.68 – 7.63 (m, 2H), 7.62 – 7.55 (m, 2H), 6.36 (s, 2H).

$^{13}\text{C NMR}$  (101 MHz, DMSO- $d_6$ )  $\delta$  147.6, 135.6, 129.1, 127.9 ppm.

**HRMS** (ESI, m/z): Calculated for  $\text{C}_6\text{H}_6\text{ClNOSNa}^+$  [ $\text{M} + \text{Na}$ ] $^+$ : 197.9751, found: 197.9744.

$[\alpha]_D^{25} = +27.744$  (c = 0.5, in  $\text{CHCl}_3$ ).

**HPLC** analysis: 92:8 e.r. (Chiralcel IB, 20:80 *i*-PrOH/*n*-Hexane, 1.0 mL/min), Rt (minor) = 8.0 min, Rt (major) = 10.6 min.

**(S)-4-Bromobenzenesulfinamide (4i)**

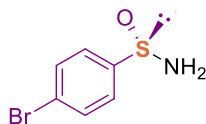

Prepared according to general procedure A. Flash column chromatography (Petroleum ether / Ethyl acetate = 3:1) yielded the title compound **4i**, faint yellow solid (16.1 mg, 73% yield);  $R_f$  0.25 (Petroleum ether / Ethyl acetate = 1:1); m.p. 130.5 – 132.4 °C.

**$^1\text{H NMR}$**  (400 MHz, DMSO- $d_6$ )  $\delta$  7.78 – 7.68 (m, 2H), 7.64 – 7.54 (m, 2H), 6.36 (s, 2H).

**$^{13}\text{C NMR}$**  (101 MHz, DMSO- $d_6$ )  $\delta$  148.1, 132.1, 128.1, 124.4 ppm.

**HRMS** (ESI,  $m/z$ ): Calculated for  $\text{C}_6\text{H}_6\text{BrNOSNa}^+$  [ $\text{M} + \text{Na}$ ] $^+$ : 241.9246, found: 241.9257.

$[\alpha]_D^{25} = +28.034$  ( $c = 0.5$ , in  $\text{CHCl}_3$ ).

**HPLC** analysis: 94:6 e.r. (Chiralcel IA, 20:80 *i*-PrOH/*n*-Hexane, 1.0 mL/min), Rt (major) = 6.4 min, Rt (minor) = 7.6 min.

**(S)-4-Iodobenzenesulfinamide (4j)**

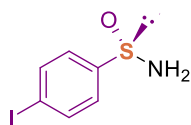

Prepared according to general procedure A. Flash column chromatography (Petroleum ether / Ethyl acetate = 3:1) yielded the title compound **4j**, faint yellow solid (21.9 mg, 82% yield);  $R_f$  0.25 (Petroleum ether / Ethyl acetate = 1:1); m.p. 140.1 – 141.7 °C.

**$^1\text{H NMR}$**  (400 MHz, DMSO- $d_6$ )  $\delta$  8.10 – 7.72 (m, 2H), 7.59 – 7.22 (m, 2H), 6.32 (s, 2H).

**$^{13}\text{C NMR}$**  (101 MHz, DMSO- $d_6$ )  $\delta$  148.6, 137.9, 128.0, 98.0 ppm.

**HRMS** (ESI,  $m/z$ ): Calculated for  $\text{C}_6\text{H}_7\text{INOS}^+$  [ $\text{M} + \text{H}$ ] $^+$ : 267.9288, found: 267.9287.

$[\alpha]_D^{25} = +17.343$  ( $c = 0.2$ , in  $\text{CHCl}_3$ ).

**HPLC** analysis: 95:5 e.r. (Chiralcel IB, 20:80 *i*-PrOH/*n*-Hexane, 1.0 mL/min), Rt (minor) = 7.0 min, Rt (major) = 8.8 min.

**<sup>15</sup>N-4j**

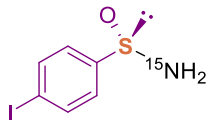

**<sup>1</sup>H NMR** (400 MHz, CDCl<sub>3</sub>) δ 8.05 – 8.00 (m, 2H), 7.71 – 7.62 (m, 2H), 4.31 (s, 1H), 4.13 (s, 1H).

**HRMS** (ESI, *m/z*): Calculated for C<sub>6</sub>H<sub>6</sub>I<sup>15</sup>NOS Na<sup>+</sup> [M + Na]<sup>+</sup>: 290.9077, found: 290.9075.

**HPLC** analysis: 95:5 e.r. (Chiralcel IA, 20:80 *i*-PrOH/*n*-Hexane, 1.0 mL/min), Rt (major) = 11.8 min, Rt (minor) = 13.7 min.

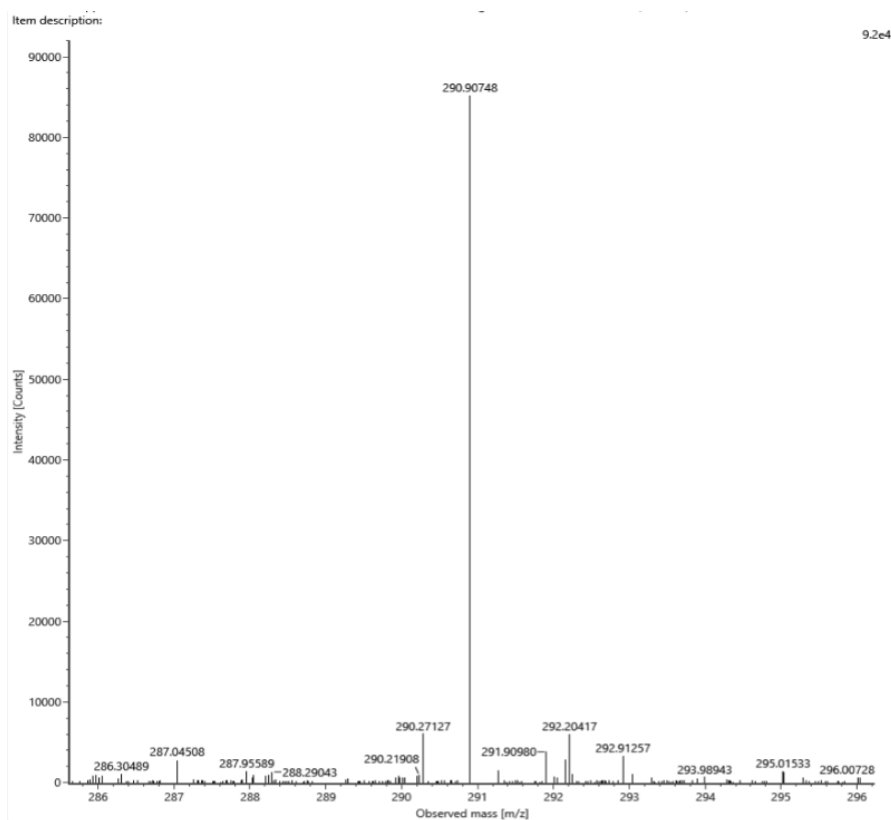



### (S)-4-Trifluoromethylbenzenesulfonamide (**4k**)

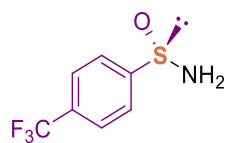

Prepared according to general procedure A. Flash column chromatography (Petroleum ether / Ethyl acetate = 3:1) yielded the title compound **4k**, faint yellow solid (13.6 mg, 65% yield);  $R_f$  0.25 (Petroleum ether / Ethyl acetate = 1:1); m.p. 125.4 – 126.7 °C.

$^1\text{H NMR}$  (400 MHz,  $\text{CDCl}_3$ )  $\delta$  7.82 (d,  $J = 8.2$  Hz, 2H), 7.71 (d,  $J = 8.2$  Hz, 2H), 4.42 (s, 2H).

$^{13}\text{C NMR}$  (101 MHz,  $\text{CDCl}_3$ )  $\delta$  150.4, 133.2 (d,  $J = 32.6$  Hz), 126.3, 126.0 (q,  $J = 3.7$  Hz), 124.9, 122.2 ppm.

$^{19}\text{F NMR}$  (377 MHz,  $\text{DMSO-}d_6$ )  $\delta$  -61.2 ppm.

**HRMS** (ESI,  $m/z$ ): Calculated for  $\text{C}_7\text{H}_7\text{F}_3\text{NOS}^+$  [ $\text{M} + \text{H}$ ] $^+$ : 208.0049, found: 208.0047.  $[\alpha]_D^{25} = +5.006$  ( $c = 0.5$ , in  $\text{CHCl}_3$ ).

**HPLC** analysis: 89:11 e.r. (Chiralcel IB, 20:80 *i*-PrOH/*n*-Hexane, 1.0 mL/min),  $R_t$  (minor) = 7.0 min,  $R_t$  (major) = 10.3 min.

### (S)-4-Methylbenzenesulfonamide (**4l**)

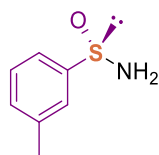

Prepared according to general procedure A. Flash column chromatography (Petroleum ether / Ethyl acetate = 3:1) yielded the title compound **4l**, faint yellow solid (9.6 mg, 62% yield);  $R_f$  0.25 (Petroleum ether / Ethyl acetate = 1:1); m.p. 115.4 – 116.3 °C.

$^1\text{H NMR}$  (400 MHz,  $\text{CDCl}_3$ )  $\delta$  7.50 – 7.40 (m, 1H), 7.30 (t,  $J = 7.6$  Hz, 1H), 7.24 – 7.16 (m, 1H), 4.42 (s, 2H), 2.34 (s, 3H).

$^{13}\text{C NMR}$  (101 MHz,  $\text{CDCl}_3$ )  $\delta$  146.3, 139.0, 131.8, 128.8, 125.7, 122.5, 21.4 ppm.

$[\alpha]_D^{25} = +8.502$  ( $c = 0.5$ , in  $\text{CHCl}_3$ ).

**HRMS** (ESI,  $m/z$ ): Calculated for  $\text{C}_7\text{H}_9\text{NOSNa}^+$  [ $\text{M} + \text{Na}$ ] $^+$ : 178.0297, found: 178.0295.

**HPLC** analysis: 96:4 e.r. (Chiralcel OJ-H, 20:80 *i*-PrOH/*n*-Hexane, 1.0 mL/min),  $R_t$

(minor) = 5.6 min, Rt (major) = 6.6 min.

### (S)-3-Chlorobenzenesulfonamide (4m)

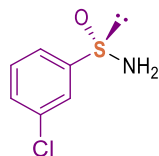

Prepared according to general procedure A. Flash column chromatography (Petroleum ether / Ethyl acetate = 3:1) yielded the title compound **4m**, faint yellow solid (10.5 mg, 60% yield);  $R_f$  0.25 (Petroleum ether / Ethyl acetate = 1:1); m.p. 127.5 – 128.1 °C.

$^1\text{H NMR}$  (400 MHz, DMSO- $d_6$ )  $\delta$  7.64 (q,  $J$  = 1.5 Hz, 1H), 7.62 – 7.52 (m, 3H), 6.42 (s, 2H).

$^{13}\text{C NMR}$  (101 MHz, DMSO- $d_6$ )  $\delta$  151.0, 133.9, 131.1, 130.7, 125.5, 124.8 ppm.

**HRMS** (ESI, m/z): Calculated for  $\text{C}_6\text{H}_7\text{ClNOS}^+$  [ $\text{M} + \text{H}$ ] $^+$ : 175.9931, found: 175.9931.

$[\alpha]_D^{25} = +3.002$  (c = 0.5, in  $\text{CHCl}_3$ ).

**HPLC** analysis: 88:12 e.r. (Chiralcel OJ-H, 10:90 *i*-PrOH/*n*-Hexane, 1.0 mL/min), Rt (minor) = 10.7 min, Rt (major) = 12.1 min.

### (S)-2-Methylbenzenesulfonamide (4n)

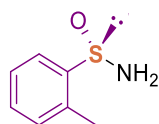

Prepared according to general procedure A. Flash column chromatography (Petroleum ether / Ethyl acetate = 3:1) yielded the title compound **4n**, faint yellow solid (8.8 mg, 57% yield);  $R_f$  0.25 (Petroleum ether / Ethyl acetate = 1:1); m.p. 117.4 – 118.6 °C.

$^1\text{H NMR}$  (400 MHz,  $\text{CDCl}_3$ )  $\delta$  7.98 – 7.86 (m, 1H), 7.32 (dd,  $J$  = 5.7, 3.4 Hz, 2H), 7.14 (dd,  $J$  = 5.45, 3.4 Hz, 1H), 4.20 (s, 2H), 2.38 (s, 3H).

$^{13}\text{C NMR}$  (101 MHz,  $\text{CDCl}_3$ )  $\delta$  144.3, 135.9, 131.1, 130.9, 126.6, 122.8, 18.6 ppm.

**HRMS** (ESI, m/z): Calculated for  $\text{C}_7\text{H}_9\text{NOSNa}^+$  [ $\text{M} + \text{Na}$ ] $^+$ : 178.0297, found: 178.0285.

$[\alpha]_D^{25} = +34.042$  (c = 0.2, in  $\text{CHCl}_3$ ).

**HPLC** analysis: 94:6 e.r. (Chiralcel IB, 20:80 *i*-PrOH/*n*-Hexane, 1.0 mL/min), Rt (minor) = 5.1 min, Rt (major) = 5.6 min.

### (S)-2-Methoxybenzenesulfinamide (4o)

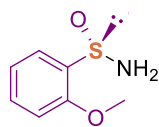

Prepared according to general procedure A. Flash column chromatography (Petroleum ether / Ethyl acetate = 3:1) yielded the title compound **4o**, faint yellow solid (10.8 mg, 63% yield);  $R_f$  0.25 (Petroleum ether / Ethyl acetate = 1:1); m.p. 127.0 – 128.2 °C.

$^1\text{H NMR}$  (400 MHz,  $\text{CDCl}_3$ )  $\delta$  7.80 (dd,  $J = 7.6, 1.6$  Hz, 1H), 7.40 (ddd,  $J = 8.8, 7.4, 1.8$  Hz, 1H), 7.10 – 6.98 (m, 1H), 6.90 (d,  $J = 8.2$  Hz, 1H), 4.28 (s, 2H), 3.86 (s, 3H).

$^{13}\text{C NMR}$  (101 MHz,  $\text{CDCl}_3$ )  $\delta$  156.2, 134.3, 132.9, 125.0, 121.1, 111.6, 56.0 ppm.

**HRMS** (ESI,  $m/z$ ): Calculated for  $\text{C}_7\text{H}_9\text{NOSNa}^+$  [ $\text{M} + \text{Na}$ ] $^+$ : 194.0246, found: 194.0242.  $[\alpha]_D^{25} = +5.673$  ( $c = 0.5$ , in  $\text{CHCl}_3$ ).

**HPLC** analysis: 90:10 e.r. (Chiralcel IB, 20:80 *i*-PrOH/*n*-Hexane, 1.0 mL/min),  $R_t$  (minor) = 7.7 min,  $R_t$  (major) = 8.3 min.

### (S)-2-Fluorobenzenesulfonamide(4p)

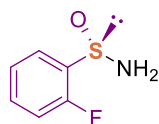

Prepared according to general procedure A. Flash column chromatography (Petroleum ether / Ethyl acetate = 3:1) yielded the title compound **4p**, faint yellow solid (8.1 mg, 51% yield);  $R_f$  0.25 (Petroleum ether / Ethyl acetate = 1:1); m.p. 124.1 – 125.4 °C.

$^1\text{H NMR}$  (400 MHz,  $\text{CDCl}_3$ )  $\delta$  7.81 (td,  $J = 7.4, 1.8$  Hz, 1H), 7.42 (tdd,  $J = 7.2, 5.0, 1.8$  Hz, 1H), 7.24 (td,  $J = 7.6, 1.1$  Hz, 1H), 7.05 (ddd,  $J = 9.4, 8.2, 1.1$  Hz, 1H), 4.56 (s, 2H).

$^{13}\text{C NMR}$  (101 MHz,  $\text{CDCl}_3$ )  $\delta$  160.0, 157.5, 133.7 (d,  $J = 15.3$  Hz), 133.4 (d,  $J = 7.8$  Hz), 126.1 – 123.1 (m), 116.3 (d,  $J = 20.5$  Hz) ppm.

$^{19}\text{F NMR}$  (377 MHz,  $\text{CDCl}_3$ )  $\delta$  -113.4 ppm.

**HRMS** (ESI,  $m/z$ ): Calculated for  $\text{C}_6\text{H}_6\text{FNOSNa}^+$  [ $\text{M} + \text{Na}$ ] $^+$ : 182.0046, found: 182.0050.

$[\alpha]_D^{25} = +10.678$  ( $c = 0.5$ , in  $\text{CHCl}_3$ ).

**HPLC** analysis: 98:2 e.r. (Chiralcel OJ-H, 10:90 *i*-PrOH/*n*-Hexane, 1.0 mL/min), Rt (minor) = 14.3 min, Rt (major) = 18.0 min.

**(S)-2,5-Dimethoxybenzenesulfonamide (4q)**

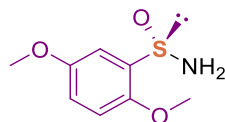

Prepared according to general procedure A. Flash column chromatography (Petroleum ether / Ethyl acetate = 3:1) yielded the title compound **4q**, faint yellow solid (10.1 mg, 50% yield);  $R_f$  0.25 (Petroleum ether / Ethyl acetate = 1:1); m.p. 131.0 – 131.8 °C..

**$^1\text{H}$  NMR** (400 MHz,  $\text{CDCl}_3$ )  $\delta$  7.36 (d,  $J$  = 3.1 Hz, 1H), 6.92 (dd,  $J$  = 8.8, 3.0 Hz, 1H), 6.84 (d,  $J$  = 8.9 Hz, 1H), 4.30 (s, 2H), 3.80 (s, 3H), 3.74 (s, 3H).

**$^{13}\text{C}$  NMR** (101 MHz,  $\text{CDCl}_3$ )  $\delta$  154.1, 150.2, 135.0, 118.9, 113.2, 109.1, 56.6, 56.0 ppm.

**HRMS** (ESI,  $m/z$ ): Calculated for  $\text{C}_8\text{H}_{11}\text{NO}_3\text{SNa}^+$  [ $\text{M} + \text{Na}$ ] $^+$ : 224.0352, found: 224.0352.

$[\alpha]_D^{25} = +13.669$  ( $c$  = 0.5, in  $\text{CHCl}_3$ ).

**HPLC** analysis: 86:14 e.r. (Chiralcel IB, 10:90 *i*-PrOH/*n*-Hexane, 1.0 mL/min), Rt (minor) = 22.1 min, Rt (major) = 25.4 min.

**(S)-2,4,6-Trimethylbenzenesulfonamide (4r)**

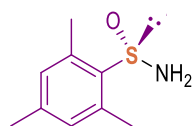

Prepared according to general procedure A. Flash column chromatography (Petroleum ether / Ethyl acetate = 3:1) yielded the title compound **4r**, faint yellow solid (9.5 mg, 52% yield);  $R_f$  0.25 (Petroleum ether / Ethyl acetate = 1:1); m.p. 110.2 – 112.1 °C.

**$^1\text{H}$  NMR** (400 MHz,  $\text{CDCl}_3$ )  $\delta$  6.78 (s, 2H), 2.52 (s, 6H), 2.20 (s, 3H).

**$^{13}\text{C}$  NMR** (101 MHz,  $\text{CDCl}_3$ )  $\delta$  140.8, 138.9, 136.3, 130.9, 21.0, 19.2 ppm.

**HRMS** (ESI,  $m/z$ ): Calculated for  $\text{C}_9\text{H}_{13}\text{NOSNa}^+$  [ $\text{M} + \text{Na}$ ] $^+$ : 206.0610, found: 206.0611.

$[\alpha]_D^{25} = +10.013$  (c = 0.5, in  $\text{CHCl}_3$ ).

**HPLC** analysis: 93:7 e.r. (Chiralcel OJ-H, 30:70 *i*-PrOH/*n*-Hexane, 1.0 mL/min),  $R_t$  (minor) = 8.8 min,  $R_t$  (major) = 14.0 min.

#### (*S*)-Naphthalene-1-sulfinamide (**4s**)

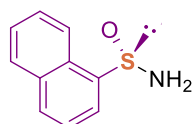

Prepared according to general procedure A. Flash column chromatography (Petroleum ether / Ethyl acetate = 3:1) yielded the title compound **4s**, faint yellow solid (14.3 mg, 75% yield);  $R_f$  0.25 (Petroleum ether / Ethyl acetate = 1:1); m.p. 125.5 – 127.1 °C.

**$^1\text{H}$  NMR** (400 MHz,  $\text{DMSO-}d_6$ )  $\delta$  8.23 (dd,  $J = 7.4, 2.0$  Hz, 1H), 8.14 – 8.02 (m, 3H), 7.68 (t,  $J = 7.7$  Hz, 1H), 7.62 (tt,  $J = 7.0, 5.3$  Hz, 2H), 6.28 (s, 2H).

**$^{13}\text{C}$  NMR** (101 MHz,  $\text{DMSO-}d_6$ )  $\delta$  143.6, 133.8, 131.4, 129.1 (d,  $J = 4.7$  Hz), 127.2, 126.9, 125.6, 123.6, 122.7 ppm.

**HRMS** (ESI,  $m/z$ ): Calculated for  $\text{C}_{10}\text{H}_9\text{NOSNa}^+$  [ $\text{M} + \text{Na}$ ] $^+$ : 214.0297, found: 214.0290.

$[\alpha]_D^{25} = +8.342$  (c = 0.5, in  $\text{CHCl}_3$ ).

**HPLC** analysis: 99:1 e.r. (Chiralcel IB, 90:10 *i*-PrOH/*n*-Hexane, 1 mL/min),  $R_t$  (major) = 11.4 min,  $R_t$  (minor) = 12.0 min.

#### (*S*)-Naphthalene-2-sulfinamide(**4t**)

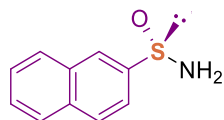

Prepared according to general procedure A. Flash column chromatography (Petroleum ether / Ethyl acetate = 3:1) yielded the title compound **4t**, faint yellow solid (14.9 mg, 78% yield);  $R_f$  0.25 (Petroleum ether / Ethyl acetate = 1:1); m.p. 120.8 – 121.4 °C.

**$^1\text{H}$  NMR** (400 MHz,  $\text{DMSO-}d_6$ )  $\delta$  8.28 (d,  $J = 1.7$  Hz, 1H), 8.15 – 7.98 (m, 3H), 7.73 (dd,  $J = 8.5, 1.8$  Hz, 1H), 7.69 – 7.58 (m, 2H), 6.38 (s, 2H).

**$^{13}\text{C}$  NMR** (101 MHz,  $\text{DMSO-}d_6$ )  $\delta$  146.0, 134.1, 132.7, 129.0 (d,  $J = 9.6$  Hz), 128.2,

128.0, 127.5, 125.5, 122.9 ppm.

$[\alpha]_D^{25} = +10.011$  ( $c = 0.5$ , in  $\text{CHCl}_3$ ).

**HRMS** (ESI,  $m/z$ ): Calculated for  $\text{C}_{10}\text{H}_9\text{NOSNa}^+$   $[\text{M} + \text{Na}]^+$ : 214.0297, found: 214.0288.

**HPLC** analysis: 98:2 e.r. (Chiralcel IB, 10:90 *i*-PrOH/*n*-Hexane, 1.0 mL/min),  $R_t$  (major) = 10.9 min,  $R_t$  (minor) = 12.8 min.

**$^{15}\text{N}$ -4t**

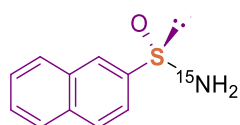

**$^1\text{H}$  NMR** (400 MHz,  $\text{CDCl}_3$ )  $\delta$  8.28 (s, 1H), 7.90 (dd,  $J = 8.8, 5.8$  Hz, 2H), 7.84 (d,  $J = 6.5$  Hz, 1H), 7.64 (dd,  $J = 8.6, 1.8$  Hz, 1H), 7.55 – 7.50 (m, 2H), 4.36 (s, 1H), 4.17 (s, 1H).

**HRMS** (ESI,  $m/z$ ): Calculated for  $\text{C}_{10}\text{H}_9^{15}\text{NOS Na}^+$   $[\text{M} + \text{Na}]^+$ : 215.0267, found: 215.0264.

**HPLC** analysis: 97:3 e.r. (Chiralcel IA, 10:90 *i*-PrOH/*n*-Hexane, 1.0 mL/min),  $R_t$  (major) = 12.6 min,  $R_t$  (minor) = 17.4 min.

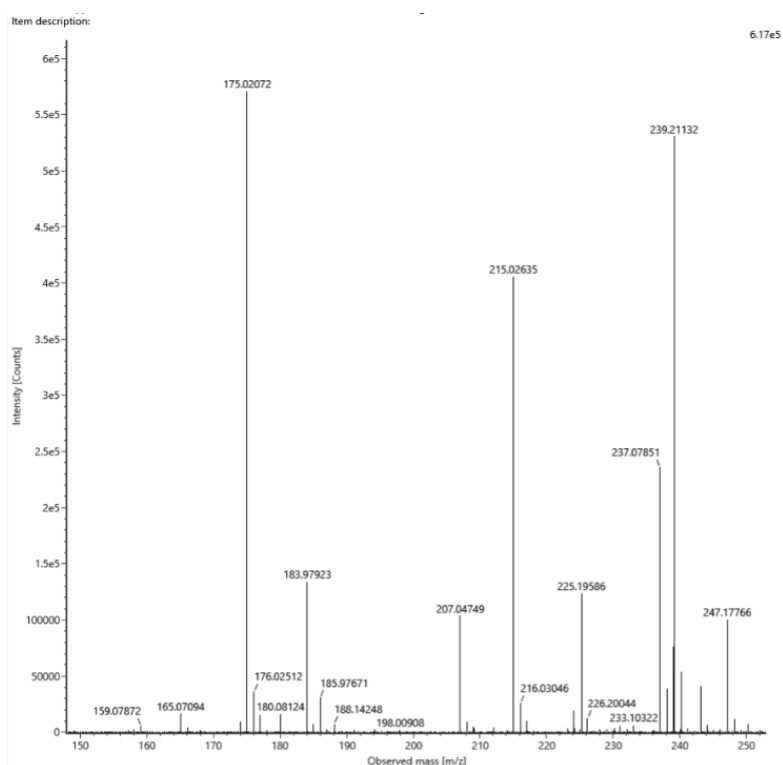

### (S)-2,3-Dihydrobenzofuran-5-sulfonamide (4u)

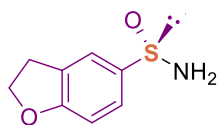

Prepared according to general procedure A. Flash column chromatography (Petroleum ether / Ethyl acetate = 3:1) yielded the title compound **4u**, faint yellow solid (12.3 mg, 67% yield);  $R_f$  0.25 (Petroleum ether / Ethyl acetate = 1:1); m.p. 110.4 – 112.5 °C.

$^1\text{H NMR}$  (400 MHz, DMSO- $d_6$ )  $\delta$  7.49 (t,  $J$  = 1.6 Hz, 1H), 7.36 (dd,  $J$  = 8.2, 2.0 Hz, 1H), 6.86 (d,  $J$  = 8.2 Hz, 1H), 6.08 (s, 2H), 4.58 (t,  $J$  = 8.8 Hz, 2H), 3.22 (t,  $J$  = 8.8 Hz, 2H).

$^{13}\text{C NMR}$  (101 MHz, DMSO- $d_6$ )  $\delta$  162.0, 140.1, 128.6, 126.2, 122.8, 109.2, 72.2, 29.2 ppm.

**HRMS** (ESI, m/z): Calculated for  $\text{C}_8\text{H}_9\text{NO}_2\text{SNa}^+$  [ $\text{M} + \text{Na}$ ] $^+$ : 206.0246, found: 206.0246.

$[\alpha]_D^{25} = +16.021$  ( $c$  = 0.2, in  $\text{CHCl}_3$ ).

**HPLC** analysis: 99:1 e.r. (Chiralcel IA, 10:90 *i*-PrOH/*n*-Hexane, 1.0 mL/min),  $R_t$  (major) = 14.2 min,  $R_t$  (minor) = 16.3 min.

### (S)-2-Thienosulfonamide (4v)

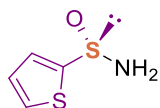

Prepared according to general procedure A. Flash column chromatography (Petroleum ether / Ethyl acetate = 3:1) yielded the title compound **4v**, faint yellow solid (9.9 mg, 67% yield);  $R_f$  0.25 (Petroleum ether / Ethyl acetate = 1:1); m.p. 92.5 – 93.7 °C.

$^1\text{H NMR}$  (400 MHz, DMSO- $d_6$ )  $\delta$  7.83 (dd,  $J$  = 5.0, 1.4 Hz, 1H), 7.32 (dd,  $J$  = 3.6, 1.4 Hz, 1H), 7.25 – 7.13 (m, 1H), 6.60 (s, 2H).

$^{13}\text{C NMR}$  (101 MHz, DMSO- $d_6$ )  $\delta$  151.7, 131.6, 129.3, 128.4 ppm.

**HRMS** (ESI, m/z): Calculated for  $\text{C}_4\text{H}_5\text{NOSNa}^+$  [ $\text{M} + \text{Na}$ ] $^+$ : 169.9722, found: 169.9722.

$[\alpha]_D^{25} = +9.010$  ( $c$  = 0.5, in  $\text{CHCl}_3$ ).

**HPLC** analysis: 97:3 e.r. (Chiralcel IB, 10:90 *i*-PrOH/*n*-Hexane, 1.0 mL/min),  $R_t$

(minor) = 14.6 min, Rt (major) = 15.9 min.

#### (S)-5-Methylthiophene sulfonamide (4w)

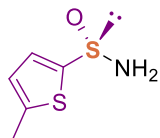

Prepared according to general procedure A. Flash column chromatography (Petroleum ether / Ethyl acetate = 3:1) yielded the title compound **4w**, faint yellow solid (10.5 mg, 65% yield);  $R_f$  0.25 (Petroleum ether / Ethyl acetate = 1:1); m.p. 105.6 – 106.3 °C.

$^1\text{H NMR}$  (400 MHz,  $\text{CDCl}_3$ )  $\delta$  7.36 – 7.17 (m, 1H), 6.79 (dq,  $J = 3.4, 1.1$  Hz, 1H), 4.52 (s, 2H), 2.53 (d,  $J = 1.1$  Hz, 3H).

$^{13}\text{C NMR}$  (101 MHz,  $\text{CDCl}_3$ )  $\delta$  146.7, 145.4, 129.9, 126.3, 15.7 ppm.

**HRMS** (ESI, m/z): Calculated for  $\text{C}_5\text{H}_7\text{NOSNa}^+$  [ $\text{M} + \text{Na}$ ] $^+$ : 183.9952, found: 183.9959.

$[\alpha]_D^{25} = +7.669$  ( $c = 0.5$ , in  $\text{CHCl}_3$ ).

**HPLC** analysis: 98:2 e.r. (Chiralcel IA, 10:90 *i*-PrOH/*n*-Hexane, 1.0 mL/min), Rt (major) = 9.9 min, Rt (minor) = 11.8 min.

#### (S)-Cyclohexylsulfonamide (4x)

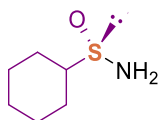

Prepared according to general procedure A. Flash column chromatography (Petroleum ether / Ethyl acetate = 3:1) yielded the title compound **3x**, colorless oil (9.0 mg, 61% yield);  $R_f$  0.25 (Petroleum ether / Ethyl acetate = 1:1).

$^1\text{H NMR}$  (400 MHz,  $\text{CDCl}_3$ )  $\delta$  4.04 (s, 2H), 2.48 (tt,  $J = 11.3, 3.7$  Hz, 1H), 2.10 – 1.99 (m, 2H), 1.88 (tt,  $J = 11.5, 3.0$  Hz, 2H), 1.70 (dt,  $J = 10.7, 3.9$  Hz, 1H), 1.50 – 1.26 (m, 5H).

$^{13}\text{C NMR}$  (101 MHz,  $\text{CDCl}_3$ )  $\delta$  63.5, 25.7 (d,  $J = 17.4$  Hz), 25.3, 25.1 (d,  $J = 3.0$  Hz) ppm.



**HRMS** (ESI,  $m/z$ ): Calculated for  $C_6H_{13}NOSNa^+$  [ $M + Na$ ] $^+$ : 170.0610, found: 170.0612.

$[\alpha]_D^{25} = +17.424$  ( $c = 0.5$ , in  $CHCl_3$ ).

**HPLC** analysis: 94:6 e.r. (Chiralcel IA, 5:95 *i*-PrOH/*n*-Hexane, 1.0 mL/min),  $R_t$  (major) = 14.2 min,  $R_t$  (minor) = 16.5 min.

#### (*S*)-2-Phenyl-ethanesulfonamide (**4y**)

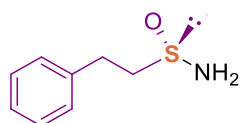

Prepared according to general procedure A. Flash column chromatography (Petroleum ether / Ethyl acetate = 3:1) yielded the title compound **4y**, colorless oil (10.5 mg, 62% yield);  $R_f$  0.25 (Petroleum ether / Ethyl acetate = 1:1).

**$^1H$  NMR** (400 MHz,  $CDCl_3$ )  $\delta$  7.29 – 7.21 (m, 2H), 7.20 – 7.12 (m, 3H), 4.17 (s, 2H), 3.11 – 2.47 (m, 4H).

**$^{13}C$  NMR** (101 MHz,  $DMSO-d_6$ )  $\delta$  141.5, 128.8, 128.7, 126.3, 53.5, 32.0 ppm.

**HRMS** (ESI,  $m/z$ ): Calculated for  $C_8H_{11}NOSNa^+$  [ $M + Na$ ] $^+$ : 192.0454, found: 192.0455.

$[\alpha]_D^{25} = +6.924$  ( $c = 0.5$ , in  $CHCl_3$ ).

**HPLC** analysis: 92:8 e.r. (Chiralcel IB, 20:80 *i*-PrOH/*n*-Hexane, 1.0 mL/min),  $R_t$  (minor) = 6.9 min,  $R_t$  (major) = 8.8 min.

#### (*S*)-4-(5-Methyl-3-phenylisoxazol-4-yl) benzenesulfinamide (**5a**)

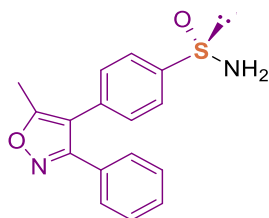

Prepared according to general procedure A. Flash column chromatography (Petroleum ether / Ethyl acetate = 3:1) yielded the title compound **5a**, colorless oil (21.3 mg, 57% yield);  $R_f$  0.3 (Petroleum ether / Ethyl acetate = 1:1).

**<sup>1</sup>H NMR** (400 MHz, CDCl<sub>3</sub>) δ 7.76 – 7.62 (m, 2H), 7.38 – 7.29 (m, 3H), 7.29 – 7.22 (m, 4H), 4.39 (s, 2H), 2.40 (d, *J* = 1.5 Hz, 3H).

**<sup>13</sup>C NMR** (101 MHz, CDCl<sub>3</sub>) δ 167.1, 161.2, 145.7, 133.6, 130.2, 129.6, 128.7, 128.5, 126.0, 114.8, 11.7 ppm.

**HRMS** (ESI, *m/z*): Calculated for C<sub>16</sub>H<sub>14</sub>N<sub>2</sub>O<sub>2</sub>SNa<sup>+</sup> [*M* + Na]<sup>+</sup>: 321.0703, found: 321.0701.

[α]<sub>D</sub><sup>25</sup> = +7.175 (*c* = 0.5, in CHCl<sub>3</sub>).

**HPLC** analysis: 99:1 e.r. (Chiralcel IA, 10:90 *i*-PrOH/*n*-Hexane, 1.0 mL/min), Rt (major) = 16.8 min, Rt (minor) = 18.9 min.

**(*S*)-4-(5-(*p*-tolyl)-3-(trifluoromethyl)-1*H*-pyrazol-1-yl)benzenesulfinamide (**5b**)**

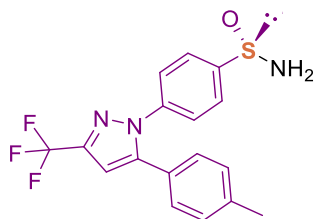

Prepared according to general procedure A. Flash column chromatography (Petroleum ether / Ethyl acetate = 3:1) yielded the title compound **5b**, colorless oil (22.5 mg, 51% yield); *R<sub>f</sub>* 0.3 (Petroleum ether / Ethyl acetate = 1:1).

**<sup>1</sup>H NMR** (400 MHz, CDCl<sub>3</sub>) δ 7.76 – 7.58 (m, 2H), 7.50 – 7.32 (m, 2H), 7.14 – 6.95 (m, 4H), 6.66 (s, 1H), 4.33 (s, 2H), 2.30 (s, 3H).

**<sup>13</sup>C NMR** (101 MHz, CDCl<sub>3</sub>) δ 146.2, 145.1, 144.0, 141.6, 139.6, 129.7, 128.7, 126.6, 125.9, 125.6, 106.0, 21.3 ppm.

**<sup>19</sup>F NMR** (377 MHz, CDCl<sub>3</sub>) δ -62.4 ppm.

**HRMS** (ESI, *m/z*): Calculated for C<sub>17</sub>H<sub>13</sub>F<sub>3</sub>N<sub>3</sub>OSNa<sup>+</sup> [*M* + Na]<sup>+</sup>: 387.0646, found: 387.0631.

[α]<sub>D</sub><sup>25</sup> = +15.373 (*c* = 0.5, in CHCl<sub>3</sub>).

**HPLC** analysis: 96:4 e.r. (Chiralcel IA, 90:10 *i*-PrOH/*n*-Hexane, 1.0 mL/min), Rt (major) = 13.9 min, Rt (minor) = 16.3 min.

**(*S*)-4-(3-(difluoromethyl)-5-(3-fluoro-4-methoxyphenyl)-1*H*-pyrazol-1-yl) phenyl (methylidyne) (λ<sup>1</sup>-oxidaneyl)- λ<sup>6</sup>-sulfanamine (**5c**)**

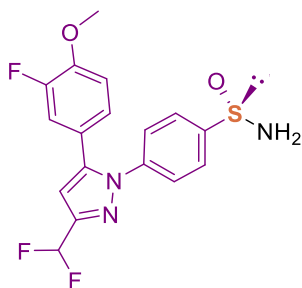

Prepared according to general procedure A. Flash column chromatography (Petroleum ether / Ethyl acetate = 3:1) yielded the title compound **5c**, colorless oil (29.2 mg, 64% yield);  $R_f$  0.25 (Petroleum ether / Ethyl acetate = 1:1).

$^1\text{H NMR}$  (400 MHz,  $\text{CDCl}_3$ )  $\delta$  7.78 – 7.64 (m, 2H), 7.46 – 7.30 (m, 2H), 6.92 – 6.80 (m, 3H), 6.74 – 6.50 (m, 2H), 4.38 (s, 2H), 3.84 (s, 3H).

$^{13}\text{C NMR}$  (101 MHz,  $\text{CDCl}_3$ )  $\delta$  151.7, 149.3, 147.2 – 146.2 (m), 144.5, 142.1, 140.0, 125.2, 124.3 – 123.1 (m), 120.4 (d,  $J = 7.2$  Hz), 115.1 (d,  $J = 20.1$  Hz), 113.1 – 111.4 (m), 109.5, 107.2, 103.9, 54.7 ppm.

$^{19}\text{F NMR}$  (377 MHz,  $\text{CDCl}_3$ )  $\delta$  -112.2, -133.5 ppm.

**HRMS** (ESI,  $m/z$ ): Calculated for  $\text{C}_{17}\text{H}_{15}\text{F}_3\text{N}_3\text{O}_2\text{S}^+$   $[\text{M} + \text{H}]^+$ : 382.0832, found: 382.0829.

$[\alpha]_D^{25} = +9.223$  ( $c = 0.5$ , in  $\text{CHCl}_3$ ).

**HPLC** analysis: 97:3 e.r. (Chiralcel IA, 15:85 *i*-PrOH/*n*-Hexane, 1.0 mL/min),  $R_t$  (major) = 8.4 min,  $R_t$  (minor) = 9.8 min.

### (*S*)-*N*-Butyl-4-methyl Benzenesulfonamide (**6**)

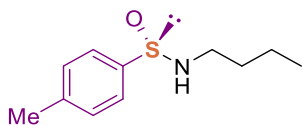

Prepared according to general procedure A. Flash column chromatography (Petroleum ether / Ethyl acetate = 1:1) yielded the title compound **6**, brown oil (13.7 mg, 78% yield);  $R_f$  0.5 (Petroleum ether / Ethyl acetate = 1:1).

$^1\text{H NMR}$  (400 MHz,  $\text{CDCl}_3$ )  $\delta$  7.62 – 7.40 (m, 2H), 7.38 – 7.10 (m, 2H), 3.92 (t,  $J = 6.2$  Hz, 1H), 3.04 (dtd,  $J = 12.4, 7.1, 5.4$  Hz, 1H), 2.75 (dq,  $J = 12.4, 7.0$  Hz, 1H), 2.34 (s, 3H), 1.42 (p,  $J = 7.0$  Hz, 2H), 1.30 – 1.20 (m, 2H), 0.80 (t,  $J = 7.3$  Hz, 3H).

$^{13}\text{C}$  NMR (101 MHz,  $\text{CDCl}_3$ )  $\delta$  141.3, 141.2, 129.5, 125.9, 40.9, 32.6, 21.3, 19.1, 13.7 ppm.

**HRMS** (ESI,  $m/z$ ): Calculated for  $\text{C}_{11}\text{H}_{17}\text{NOSNa}^+$   $[\text{M} + \text{Na}]^+$ : 234.0923, found: 234.0919.

$[\alpha]_{\text{D}}^{25} = +8.928$  ( $c = 0.4$  in  $\text{CHCl}_3$ ).

**HPLC** analysis: 96:4 e.r. (Chiralcel OD-H, 5:95 *i*-PrOH/*n*-Hexane, 1.0 mL/min),  $R_t$  (minor) = 13.2 min,  $R_t$  (major) = 15.9 min.

### (*S*)-*N*-Cyclopentyl-4-methylbenzenesulfonamide (**7**)

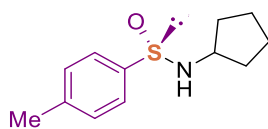

Prepared according to general procedure A. Flash column chromatography (Petroleum ether / Ethyl acetate = 1:1) yielded the title compound **7**, colorless oil (13.9 mg, 75% yield);  $R_f$  0.5 (Petroleum ether / Ethyl acetate = 1:1).

$^1\text{H}$  NMR (400 MHz,  $\text{CDCl}_3$ )  $\delta$  7.64 – 7.32 (m, 2H), 7.34 – 7.10 (m, 2H), 3.88 (d,  $J = 6.2$  Hz, 1H), 3.66 (h,  $J = 6.4$  Hz, 1H), 2.34 (s, 3H), 2.02 – 1.84 (m, 1H), 1.82 – 1.68 (m, 1H), 1.66 – 1.54 (m, 3H), 1.54 – 1.38 (m, 2H), 1.38 – 1.28 (m, 1H).

$^{13}\text{C}$  NMR (101 MHz,  $\text{CDCl}_3$ )  $\delta$  142.2, 141.1, 129.5, 125.8, 55.0, 34.7, 34.2, 23.41, 23.36, 21.3 ppm.

**HRMS** (ESI,  $m/z$ ): Calculated for  $\text{C}_{12}\text{H}_{17}\text{NOSNa}^+$   $[\text{M} + \text{Na}]^+$ : 246.0923, found: 246.0922.

$[\alpha]_{\text{D}}^{25} = +43.557$  ( $c = 0.2$  in  $\text{CHCl}_3$ ).

**HPLC** analysis: 96:4 e.r. (Chiralcel OD-H, 10:90 *i*-PrOH/*n*-Hexane, 1.0 mL/min),  $R_t$  (minor) = 6.0 min,  $R_t$  (major) = 6.9 min.

### (*S*)-*N*-(3,7-Dimethyloct-6-en-1-yl)-4-methylbenzenesulfonamide (**8**)

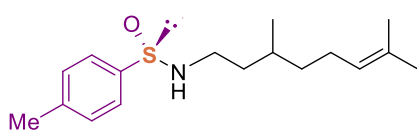

Prepared according to general procedure A. Flash column chromatography (Petroleum ether / Ethyl acetate = 1:1) yielded the title compound **8**, brown oily (16.1 mg, 66% yield);  $R_f$  0.5 (Petroleum ether / Ethyl acetate = 1:1).

$^1\text{H NMR}$  (400 MHz,  $\text{CDCl}_3$ )  $\delta$  7.58 (d,  $J = 7.9$  Hz, 2H), 7.30 (d,  $J = 7.9$  Hz, 2H), 5.05 (t,  $J = 7.2$  Hz, 1H), 3.91 (t,  $J = 6.2$  Hz, 1H), 3.16 (ddt,  $J = 11.6, 8.7, 5.4$  Hz, 1H), 2.81 (ddt,  $J = 12.9, 8.6, 6.5$  Hz, 1H), 2.41 (s, 3H), 1.93 (hept,  $J = 7.5$  Hz, 2H), 1.67 (s, 3H), 1.58 (s, 3H), 1.55 – 1.40 (m, 2H), 1.34 (dtd,  $J = 14.2, 7.6, 6.8, 2.6$  Hz, 2H), 1.12 (ddt,  $J = 13.5, 9.2, 7.0$  Hz, 1H), 0.94 – 0.84 (m, 1H), 0.81 (d,  $J = 6.4$  Hz, 3H).

$^{13}\text{C NMR}$  (101 MHz,  $\text{CDCl}_3$ )  $\delta$  141.3, 141.2, 131.4, 129.5, 125.9, 124.6, 39.1, 37.6, 36.9, 30.1, 25.7, 25.3, 21.3, 19.3, 17.7 ppm.

**HRMS** (ESI,  $m/z$ ): Calculated for  $\text{C}_{17}\text{H}_{27}\text{NOSNa}^+$  [ $\text{M} + \text{Na}$ ] $^+$ : 316.1706, found: 316.1693.

$[\alpha]_D^{25} = +3.338$  ( $c = 0.4$  in  $\text{CHCl}_3$ ).

**HPLC** analysis: 97:3 e.r. (Chiralcel OD-H, 10:90 *i*-PrOH/*n*-Hexane, 1.0 mL/min),  $R_t$  (minor) = 8.1 min,  $R_t$  (major) = 11.6 min.

#### (*S*)-4-Methyl-*N*-phenylbenzenesulfinamide (**9**)

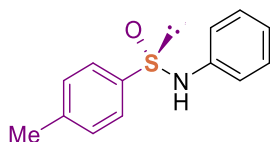

Prepared according to general procedure A. Flash column chromatography (Petroleum ether / Ethyl acetate = 5:1) yielded the title compound **9**, faint white solid (16.9 mg, 73% yield);  $R_f$  0.4 (Petroleum ether / Ethyl acetate = 5:1); m.p. 100.4 – 103.2 °C.

$^1\text{H NMR}$  (400 MHz,  $\text{CDCl}_3$ )  $\delta$  7.70 – 7.57 (m, 2H), 7.35 – 7.19 (m, 4H), 7.12 – 6.97 (m, 3H), 6.42 (s, 1H), 2.41 (s, 3H).

$^{13}\text{C NMR}$  (101 MHz,  $\text{CDCl}_3$ )  $\delta$  141.9, 141.5 (d,  $J = 2.6$  Hz), 140.8, 129.8, 129.5, 125.54, 123.5, 118.8, 21.4 ppm.

**HRMS** (ESI,  $m/z$ ): Calculated for  $\text{C}_{13}\text{H}_{14}\text{NOS}^+$  [ $\text{M} + \text{H}$ ] $^+$ : 232.0791, found: 232.0793.  
 $[\alpha]_D^{25} = +97.253$  ( $c = 0.2$  in  $\text{CHCl}_3$ ).

**HPLC** analysis: 96:4 e.r. (Chiralcel ID, 20:80 *i*-PrOH/*n*-Hexane, 1.0 mL/min),  $R_t$  (minor) = 13.2 min,  $R_t$  (major) = 15.9 min.

**(S)-N-(*p*-Tolylsulfinyl) methacrylamide (10)**

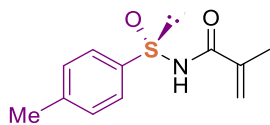

Prepared according to general procedure A. Flash column chromatography (Petroleum ether / Ethyl acetate = 1:1) yielded the title compound **10**, colorless oil (15.6 mg, 70% yield);  $R_f$  0.4 (Petroleum ether / Ethyl acetate = 1:1).

$^1\text{H NMR}$  (400 MHz,  $\text{CDCl}_3$ )  $\delta$  8.06 (s, 1H), 7.65 – 7.58 (m, 2H), 7.35 (d,  $J = 8.0$  Hz, 2H), 5.76 (d,  $J = 1.1$  Hz, 1H), 5.56 (q,  $J = 1.6$  Hz, 1H), 2.44 (s, 3H), 1.97 (t,  $J = 1.3$  Hz, 3H).

$^{13}\text{C NMR}$  (101 MHz,  $\text{CDCl}_3$ )  $\delta$  136.5, 130.2, 129.4, 128.3, 127.6, 124.59, 21.7, 21.5.

**HRMS** (ESI,  $m/z$ ): Calculated for  $\text{C}_{11}\text{H}_{13}\text{NO}_2\text{SNa}^+$  [ $\text{M} + \text{Na}$ ] $^+$ : 246.0559, found: 246.0556.

$[\alpha]_D^{25} = +11.680$  ( $c = 0.5$  in  $\text{CHCl}_3$ ).

**HPLC** analysis: 93:7 e.r. (Chiralcel ID, 10:90 *i*-PrOH/*n*-Hexane, 1.0 mL/min),  $R_t$  (minor) = 13.9 min,  $R_t$  (major) = 23.8 min.

**(R)-N-[(S)-2,2-Dimethyl-1-phenylpropionate methyl ester]-4-methylbenzenesulfin-amide (11)**

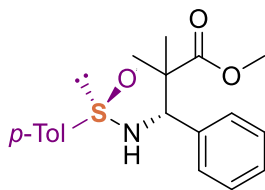

Prepared according to general procedure A. Flash column chromatography (Petroleum ether / Ethyl acetate = 1:1) yielded the title compound **11**, colorless oil (34.6 mg, 80% yield, 6:1 d.r. (determined by HPLC));  $R_f$  0.5 (Petroleum ether / Ethyl acetate = 1:1).

$^1\text{H NMR}$  (400 MHz,  $\text{CDCl}_3$ )  $\delta$  7.30 – 7.24 (m, 2H), 7.11 – 7.01 (m, 3H), 6.96 (d,  $J = 7.9$  Hz, 2H), 6.86 – 6.80 (m, 2H), 5.45 (d,  $J = 7.7$  Hz, 1H), 4.29 (d,  $J = 7.7$  Hz, 1H), 3.62 (s, 3H), 2.22 (s, 3H), 1.21 (s, 3H), 1.08 (d,  $J = 17.3$  Hz, 1H), 1.00 (s, 3H).

$^{13}\text{C NMR}$  (101 MHz,  $\text{CDCl}_3$ )  $\delta$  176.9, 141.0, 140.9, 139.7, 129.0, 127.9, 127.70, 127.2, 125.9, 62.8, 52.1, 47.2, 24.8, 21.4, 21.2 ppm.

**HRMS** (ESI, m/z): Calculated for C<sub>19</sub>H<sub>23</sub>NO<sub>3</sub>SNa<sup>+</sup> [M + Na]<sup>+</sup>: 368.1291, found: 368.1280.

[α]<sup>25</sup><sub>D</sub> = 20.511 (c = 0.2, in CHCl<sub>3</sub>).

**HPLC** analysis: 93:7 e.r. (Chiralcel IA, 10:90 *i*-PrOH/*n*-Hexane, 1.0 mL/min), Rt (major) = 8.5 min, Rt (minor) = 10.8 min.

**(S)-N-(2-(Diphenylphosphaneyl) benzyl)-4-methylbenzenesulfonamide (12)**

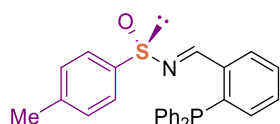

Prepared according to general procedure A. Flash column chromatography (Petroleum ether / Ethyl acetate = 5:1) yielded the title compound **12**, yellow solid (53.0 mg, 53% yield); R<sub>f</sub> 0.7 (Petroleum ether / Ethyl acetate = 5:1); m.p. 115.3 – 117.5 °C.

**<sup>1</sup>H NMR** (400 MHz, CDCl<sub>3</sub>) δ 9.38 (d, *J* = 5.2 Hz, 1H), 7.94 (ddd, *J* = 7.6, 3.8, 1.4 Hz, 1H), 7.30 (tddd, *J* = 14.1, 8.2, 7.0, 3.0 Hz, 14H), 7.14 (d, *J* = 8.0 Hz, 2H), 6.94 (ddd, *J* = 7.6, 4.2, 1.4 Hz, 1H), 2.34 (s, 3H).

**<sup>13</sup>C NMR** (101 MHz, CDCl<sub>3</sub>) δ 159.7, 159.5, 141.7, 141.4, 140.2, 140.0, 137.3, 137.2, 136.8 – 136.4 (m), 136.1 (d, *J* = 9.8 Hz), 134.4, 134.2 (d, *J* = 3.6 Hz), 133.9 (d, *J* = 4.8 Hz), 131.8, 129.9 (d, *J* = 4.0 Hz), 129.7, 129.0 – 128.9 (m), 128.7 (dd, *J* = 7.2, 1.7 Hz), 124.8, 21.5 ppm.

**<sup>31</sup>P NMR** (162 MHz, CDCl<sub>3</sub>) δ -13.3 ppm.

**HRMS** (ESI, m/z): Calculated for C<sub>26</sub>H<sub>22</sub>NOPSNa<sup>+</sup> [M + Na]<sup>+</sup>: 450.1052, found: 450.1048.

[α]<sup>25</sup><sub>D</sub> = +81.511 (c = 0.5 in CHCl<sub>3</sub>).

**HPLC** analysis: 94:6 e.r. (Chiralcel IA, 10:90 *i*-PrOH/*n*-Hexane, 1.0 mL/min), Rt (minor) = 7.0 min, Rt (major) = 9.0 min.

**(S)-N-((S)-1-(2-(diphenylphosphaneyl) phenyl) *tert*-butyl)-4-methylbenzenesulfonamide (13)**

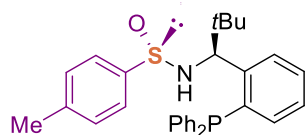

Prepared according to general procedure A. Flash column chromatography (Petroleum ether / Ethyl acetate = 5:1) yielded the title compound **13**, a white solid. (37.1 mg, 70% yield, >20:1 d.r. (determined by  $^1\text{H}$  NMR));  $R_f$  0.5 (Petroleum ether / Ethyl acetate = 5:1); m.p. 88.3 – 90.5 °C.

$^1\text{H}$  NMR (400 MHz,  $\text{CDCl}_3$ )  $\delta$  7.51 – 7.30 (m, 8H), 7.25 – 7.09 (m, 10H), 5.64 (dd,  $J = 11.1, 4.7$  Hz, 1H), 4.28 (d,  $J = 4.9$  Hz, 1H), 2.32 (s, 3H), 0.86 (s, 9H).

$^{13}\text{C}$  NMR (101 MHz,  $\text{CDCl}_3$ )  $\delta$  146.6, 146.4, 143.2, 141.1, 138.4, 138.3, 137.56 (d,  $J = 14.0$  Hz), 136.7 (d,  $J = 11.7$  Hz), 135.8, 133.8, 133.6 (d,  $J = 6.5$  Hz), 133.4, 129.4, 128.8, 128.6 (d,  $J = 4.9$  Hz), 128.5 – 128.3 (m), 127.4, 125.5, 63.0, 62.7, 36.1, 29.7, 27.2 (d,  $J = 2.8$  Hz), 21.4 ppm.

$^{31}\text{P}$  NMR (162 MHz,  $\text{CDCl}_3$ )  $\delta$  -19.0 ppm.

HRMS (ESI,  $m/z$ ): Calculated for  $\text{C}_{30}\text{H}_{32}\text{NOPSNa}^+$  [ $\text{M} + \text{Na}$ ] $^+$ : 508.1834, found: 508.1844.

$[\alpha]_D^{25} = +41.389$  ( $c = 0.2$  in  $\text{CHCl}_3$ ).

#### (*S*)-*N*-Benzoyl-1-methyl-(*p*-tolyl)-oxidanesulfinimidic chloride (**14**)

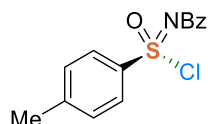

Prepared according to general procedure A. Flash column chromatography (Petroleum ether / Ethyl acetate = 10:1) yielded the title compound **14**, white solid (0.18 g, 60% yield).;  $R_f$  0.7 (Petroleum ether / Ethyl acetate = 10:1); m.p. 97.3 – 100.0 °C.

$^1\text{H}$  NMR (400 MHz,  $\text{CDCl}_3$ )  $\delta$  8.13 (ddd,  $J = 11.6, 7.4, 1.6$  Hz, 4H), 7.62 – 7.52 (m, 1H), 7.52 – 7.40 (m, 4H), 2.50 (s, 3H).

$^{13}\text{C}$  NMR (101 MHz,  $\text{CDCl}_3$ )  $\delta$  171.0, 147.0, 140.1, 134.2, 133.4, 130.4, 129.78, 128.4, 127.2, 21.9 ppm.

HRMS (ESI,  $m/z$ ): Calculated for  $\text{C}_{14}\text{H}_{12}\text{ClINO}_2\text{SNa}^+$  [ $\text{M} + \text{Na}$ ] $^+$ : 316.0169, found: 316.0170.



$[\alpha]_D^{25} = -44.356$  ( $c = 0.2$  in  $\text{CHCl}_3$ ).

**HPLC** analysis: 96:4 e.r. (Chiralcel IA, 10:90 *i*-PrOH/*n*-Hexane, 1.0 mL/min),  $R_t$  (major) = 13.6 min,  $R_t$  (minor) = 16.9 min.

**(S)-4-Nitrophenyl N-benzoyl-4-methylbenzenesulfonimidate (15)**

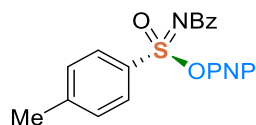

Prepared according to general procedure A. Flash column chromatography (Petroleum ether / Ethyl acetate = 10:1) yielded the title compound **15**, faint yellow solid (45 mg, 90% yield);  $R_f$  0.5 (Petroleum ether / Ethyl acetate = 10:1); m.p. 131.5 – 133.3 °C.

**$^1\text{H}$  NMR** (400 MHz,  $\text{CDCl}_3$ )  $\delta$  8.23 – 8.16 (m, 2H), 8.15 – 8.10 (m, 2H), 8.03 – 7.91 (m, 2H), 7.63 – 7.50 (m, 1H), 7.42 (dt,  $J = 7.8, 3.6$  Hz, 4H), 7.36 – 7.28 (m, 2H), 2.49 (s, 3H).

**$^{13}\text{C}$  NMR** (101 MHz,  $\text{CDCl}_3$ )  $\delta$  171.6, 153.9, 146.6, 146.3, 134.7, 132.9, 130.3, 129.8, 128.3, 128.2, 125.4, 123.8, 21.8 ppm.

**HRMS** (ESI,  $m/z$ ): Calculated for  $\text{C}_{20}\text{H}_{16}\text{N}_2\text{O}_5\text{SNa}^+$   $[\text{M} + \text{Na}]^+$ : 419.0672, found: 419.0672.

$[\alpha]_D^{25} = +7.288$  ( $c = 0.2$  in  $\text{CHCl}_3$ ).

**HPLC** analysis: 93:7 e.r. (Chiralcel IB, 10:90 *i*-PrOH/*n*-Hexane, 1.0 mL/min),  $R_t$  (major) = 16.8 min,  $R_t$  (minor) = 18.9 min.

**(S)-Phenyl N-benzoyl-4-methylbenzenesulfonimidate (16)**

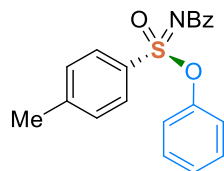

Prepared according to general procedure A. Flash column chromatography (Petroleum ether / Ethyl acetate = 10:1) yielded the title compound **16**, colorless oil (19.5 mg, 65% yield);  $R_f$  0.5 (Petroleum ether / Ethyl acetate = 10:1).

**<sup>1</sup>H NMR** (400 MHz, CDCl<sub>3</sub>) δ 8.10 – 7.99 (m, 2H), 7.89 – 7.82 (m, 2H), 7.50 – 7.39 (m, 1H), 7.38 – 7.25 (m, 4H), 7.25 – 7.14 (m, 3H), 7.09 – 6.99 (m, 2H), 2.37 (s, 3H).

**<sup>13</sup>C NMR** (101 MHz, CDCl<sub>3</sub>) δ 171.9, 149.3, 145.8, 135.3, 133.2, 132.5, 129.94, 129.7, 128.3, 128.1, 127.4, 122.9, 21.8 ppm.

**HRMS** (ESI, m/z): Calculated for C<sub>20</sub>H<sub>17</sub>NO<sub>3</sub>SNa<sup>+</sup> [M + Na]<sup>+</sup>: 374.0821, found: 374.0828.

[α]<sub>D</sub><sup>25</sup> = +6.557 (c = 0.2 in CHCl<sub>3</sub>).

**HPLC** analysis: 96:4 e.r. (Chiralcel IA, 20:80 *i*-PrOH/*n*-Hexane, 1.0 mL/min), Rt (minor) = 9.1 min, Rt (major) = 11.2 min.

**(S)-4-Nitrophenyl N-benzoyl-4-methylbenzenesulfonimidate (17)**

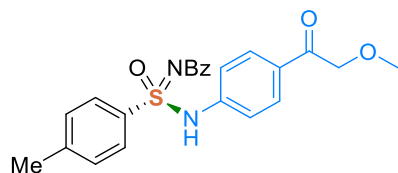

Prepared according to general procedure A. Flash column chromatography (Petroleum ether / Ethyl acetate = 5:1) yielded the title compound **17**, colorless oil (16.5 mg, 55% yield); R<sub>f</sub> 0.3 (Petroleum ether / Ethyl acetate = 5:1).

**<sup>1</sup>H NMR** (400 MHz, CDCl<sub>3</sub>) δ 8.20 – 8.13 (m, 2H), 7.96 – 7.89 (m, 2H), 7.88 – 7.80 (m, 2H), 7.58 – 7.49 (m, 1H), 7.42 (dd, *J* = 8.4, 7.0 Hz, 2H), 7.25 (d, *J* = 8.3 Hz, 2H), 7.23 – 7.15 (m, 2H), 4.32 (q, *J* = 7.1 Hz, 2H), 2.37 (s, 3H), 1.35 (t, *J* = 7.1 Hz, 3H).

**<sup>13</sup>C NMR** (101 MHz, CDCl<sub>3</sub>) δ 172.8, 165.9, 145.0, 140.4, 136.0, 135.1, 132.8, 131.2, 130.1, 129.7, 128.2, 127.2, 126.8, 119.9, 61.0, 21.6, 14.3 ppm.

**HRMS** (ESI, m/z): Calculated for C<sub>23</sub>H<sub>22</sub>N<sub>2</sub>O<sub>4</sub>SNa<sup>+</sup> [M + Na]<sup>+</sup>: 423.1373, found: 423.1369.

[α]<sub>D</sub><sup>25</sup> = +15.938 (c = 0.4 in CHCl<sub>3</sub>).

**HPLC** analysis: 95:5 e.r. (Chiralcel IC, 25:75 *i*-PrOH/*n*-Hexane, 1.0 mL/min), Rt (major) = 16.6 min, Rt (minor) = 21.9 min.

**(S)-N-(Oxo((1R,5R)-8-oxo-1,5,6,8-tetrahydro-2H-1,5-methanopyrido[1,2-a][1,5]diazocin-3(4H)-yl) (*p*-tolyl)-λ<sup>6</sup>-sulfaneylidene) benzamide (18)**

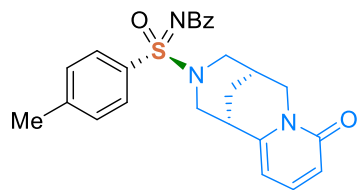

Prepared according to general procedure A. Flash column chromatography (Ethyl acetate) yielded the title compound **18**, colorless oil (21.3 mg, 71% yield);  $R_f$  0.2 (Ethyl acetate).

$^1\text{H NMR}$  (400 MHz,  $\text{CDCl}_3$ )  $\delta$  8.19 – 8.01 (m, 2H), 7.60 – 7.40 (m, 3H), 7.36 (tt,  $J = 6.7, 1.4$  Hz, 2H), 7.28 (dd,  $J = 9.1, 6.8$  Hz, 1H), 7.16 (d,  $J = 8.2$  Hz, 2H), 6.46 (dd,  $J = 9.1, 1.4$  Hz, 1H), 6.04 (dd,  $J = 6.9, 1.4$  Hz, 1H), 4.03 (ddd,  $J = 12.0, 3.4, 1.9$  Hz, 1H), 3.70 – 3.57 (m, 1H), 3.47 (dd,  $J = 12.1, 2.0$  Hz, 1H), 3.42 – 3.30 (m, 2H), 3.17 – 3.09 (m, 1H), 3.09 – 2.97 (m, 1H), 2.36 (s, 3H), 1.88 (t,  $J = 3.2$  Hz, 5H).

$^{13}\text{C NMR}$  (101 MHz,  $\text{CDCl}_3$ )  $\delta$  173.1, 163.2, 149.1, 145.0, 139.1, 135.6, 134.4, 132.3, 130.1, 129.5, 128.1, 127.6, 117.3, 105.4, 53.5, 51.0, 48.9, 34.7, 27.1, 25.2, 21.7 ppm.

**HRMS** (ESI,  $m/z$ ): Calculated for  $\text{C}_{25}\text{H}_{25}\text{N}_3\text{O}_3\text{SNa}^+$  [ $\text{M} + \text{Na}$ ] $^+$ : 448.1689, found: 448.1689.

$[\alpha]_D^{25} = -13.585$  ( $c = 0.2$ , in  $\text{CHCl}_3$ ).

**HPLC** analysis: 95:5 e.r. (Chiralcel IA, 50:50 *i*-PrOH/*n*-Hexane, 1.0 mL/min),  $R_t$  (minor) = 8.1 min,  $R_t$  (major) = 10.2 min.

**(S)-3-Ethyl-5-methyl (4S)-2-((2-((N'-benzoyl-4-methylphenyl) sulfonoamidimidido) ethoxy) methyl)-4-(2-chlorophenyl)-6-methyl-1,4-dihydropyridine-3,5-dicarboxylate (20)**

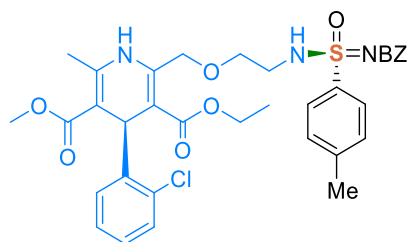

Prepared according to general procedure A. Flash column chromatography (Petroleum ether / Ethyl acetate = 5:1) yielded the title compound **20**, colorless oil (20.855 mg, 70% yield);  $R_f$  0.6 (Petroleum ether / Ethyl acetate = 5:1).

**<sup>1</sup>H NMR** (400 MHz, CDCl<sub>3</sub>) δ 8.18 (t, *J* = 6.0 Hz, 1H), 8.08 – 8.00 (m, 2H), 7.82 (d, *J* = 8.2 Hz, 2H), 7.50 – 7.39 (m, 1H), 7.31 (ddt, *J* = 21.4, 13.9, 7.4 Hz, 6H), 7.15 (dd, *J* = 8.0, 1.2 Hz, 1H), 7.07 (td, *J* = 7.4, 1.4 Hz, 1H), 6.96 (td, *J* = 7.6, 1.6 Hz, 1H), 5.32 (s, 1H), 4.64 (q, *J* = 15.6 Hz, 2H), 3.96 (qd, *J* = 7.0, 4.1 Hz, 2H), 3.67 (ddd, *J* = 9.8, 6.6, 3.2 Hz, 1H), 3.54 (s, 3H), 3.32 (dtd, *J* = 13.4, 6.7, 3.4 Hz, 1H), 3.13 (ddd, *J* = 14.0, 6.8, 3.4 Hz, 1H), 2.36 (d, *J* = 5.4 Hz, 6H), 1.68 (s, 1H), 1.10 (t, *J* = 7.0 Hz, 3H).

**<sup>13</sup>C NMR** (101 MHz, CDCl<sub>3</sub>) δ 173.3, 168.1, 167.3, 146.0, 144.9 (d, *J* = 4.2 Hz), 144.7, 136.0, 135.4, 132.5, 132.2, 131.5, 130.1, 129.5, 129.2, 128.1, 127.4, 127.3, 127.0, 103.8, 101.8, 69.2, 68.0, 59.9, 50.8, 41.7, 37.0, 25.6, 21.6, 19.2, 14.3 ppm.

**HRMS** (ESI, *m/z*): Calculated for C<sub>34</sub>H<sub>36</sub>ClN<sub>3</sub>O<sub>7</sub>SNa<sup>+</sup> [M + Na]<sup>+</sup>: 666.2035, found: 666.2025.

[α]<sub>D</sub><sup>25</sup> = -16.687 (c = 0.2, in CHCl<sub>3</sub>).

**HPLC** analysis: 96:4 e.r. (Chiralcel IG, 90:10 *i*-PrOH/*n*-Hexane, 1.0 mL/min), Rt (major) = 14.5 min, Rt (minor) = 17.9 min.

## 4. References

- [1] U. M. Andreas, S. Karolína, S. Tomáš and K. Burkhard, *Chem. Eur. J.*, 2016, **22**, 8381–8699.
- [2] R.-H. Zhu and X.-X. Shi, *Tetrahedron: Asymmetry*, 2011, **22**, 387–393.
- [3] X. Lv, Q. Xiang and Q. Zeng, *Org. Prep. Proceed. Int.* 2015, **46**, 164–175.
- [4] C. Li, K. Zhang, H.-G. Ma, S. Wu, Y.-L. Huang, Y.-F. Duan, Y.-H. Luo, J. Yan and G. Yang, *Chem. Eur. J.*, 2022, **28**, e202202190.
- [5] M. Sara, G. G. Fernando, L. G. R. José and B. M. Cid, *J. Am. Chem. Soc.*, 2014, **136**, 1082–1089.
- [6] E. k. Takahashi, H. Fujisawa, T. Yanai and T. Mukaiyama, *ACS Med. Chem. Lett.*, 2005, Vol.34, No.4.
- [7] Z.-M. Zhang, B. Xu, S. Xu, H.-H. Wu and J.-L. Zhang, *Angew. Chem. Int. Ed.*, 2016, **55**, 6324–6328.
- [8] G.-F. Yang, Y. Yuan, Y. Tian, S.-Q. Zhang, X. Cui, B. Xia, G.-X. Li and Z. Tang, *J. Am. Chem. Soc.*, 2023, **145**, 5439–5446.
- [9] X. Zhang, C. X. Ang E., Z.-Q. Yang, C.-W. Kee and C.-H. Tan. *Nature*, 2022, **604**, 298–303.
- [10] N. Shibata, M. Matsunaga, M. Nakagawa, T. Fukuzumi, S. Nakamura and T. Toru, *J. Am. Chem. Soc.*, 2005, **127**, 1374–1375.
- [11] J. W. Evans, M. B. Fierman, S. J. Miller and J. A. Ellman, *J. Am. Chem., Soc.* 2004, **126**, 8134–8135.
- [12] H. M. Peltier, J. W. Evan and J. A. Ellman, *Org. Lett.*, 2005, **127**, 1733–1736.
- [13] B. Lu, F. Jin, Y. Zhang, X. Wu, S. Wald and C. Senanayake, *Org. Lett.*, 2005, **7**, 1465–1468.
- [14] Y. D. Zhang, S. Chitale, N. Goyal, G. S. Li, Z. S. Han, S. Shen, S. L. Ma, N. Grinberg, H. Lee, B. Z. Lu and C. H. Senanayake, *J. Org. Chem.*, 2012, **77**, 690–695.
- [15] N. Khair, C. S. Araújo, F. Alcudia and I. Fernández, *J. Org. Chem.*, 2002, **67**, 345–356.
- [16] N. Shibata, M. Matsunaga, T. Fukuzumi, S. Nakamura and T. Toru, *Synlett.*, 2005,

**11**, 1699–1702.

[17] A. Busu, D. J. Gallagher P. Beak, *J. Org. Chem.*, 1996, **61**, 5718–5719.

[18] M.-H. Liao, Y.-G. Liu, H.-Y. Long, Q. Xiong, X.-K. Lv, Z.-F. Luo, X. Wu and Y. R. Chi, *Chem.* 2024, **10**, 1541–1552.

[19] T. Wei, H.-L. Wang, Y. Tian, M.-S. Xi and H.-M. Gu, *Nat. Chem.*, 2024, **16**, 1301–1311.

[20] E. Winterling, S. Ivlev and E. Meggers, *Organometallics*, 2021, **40**, 1148-1155.

## 5. Copies of $^1\text{H}$ , $^{19}\text{F}$ and $^{13}\text{C}$ NMR

### (S)-4-Methylbenzenesulfonamide (4a):

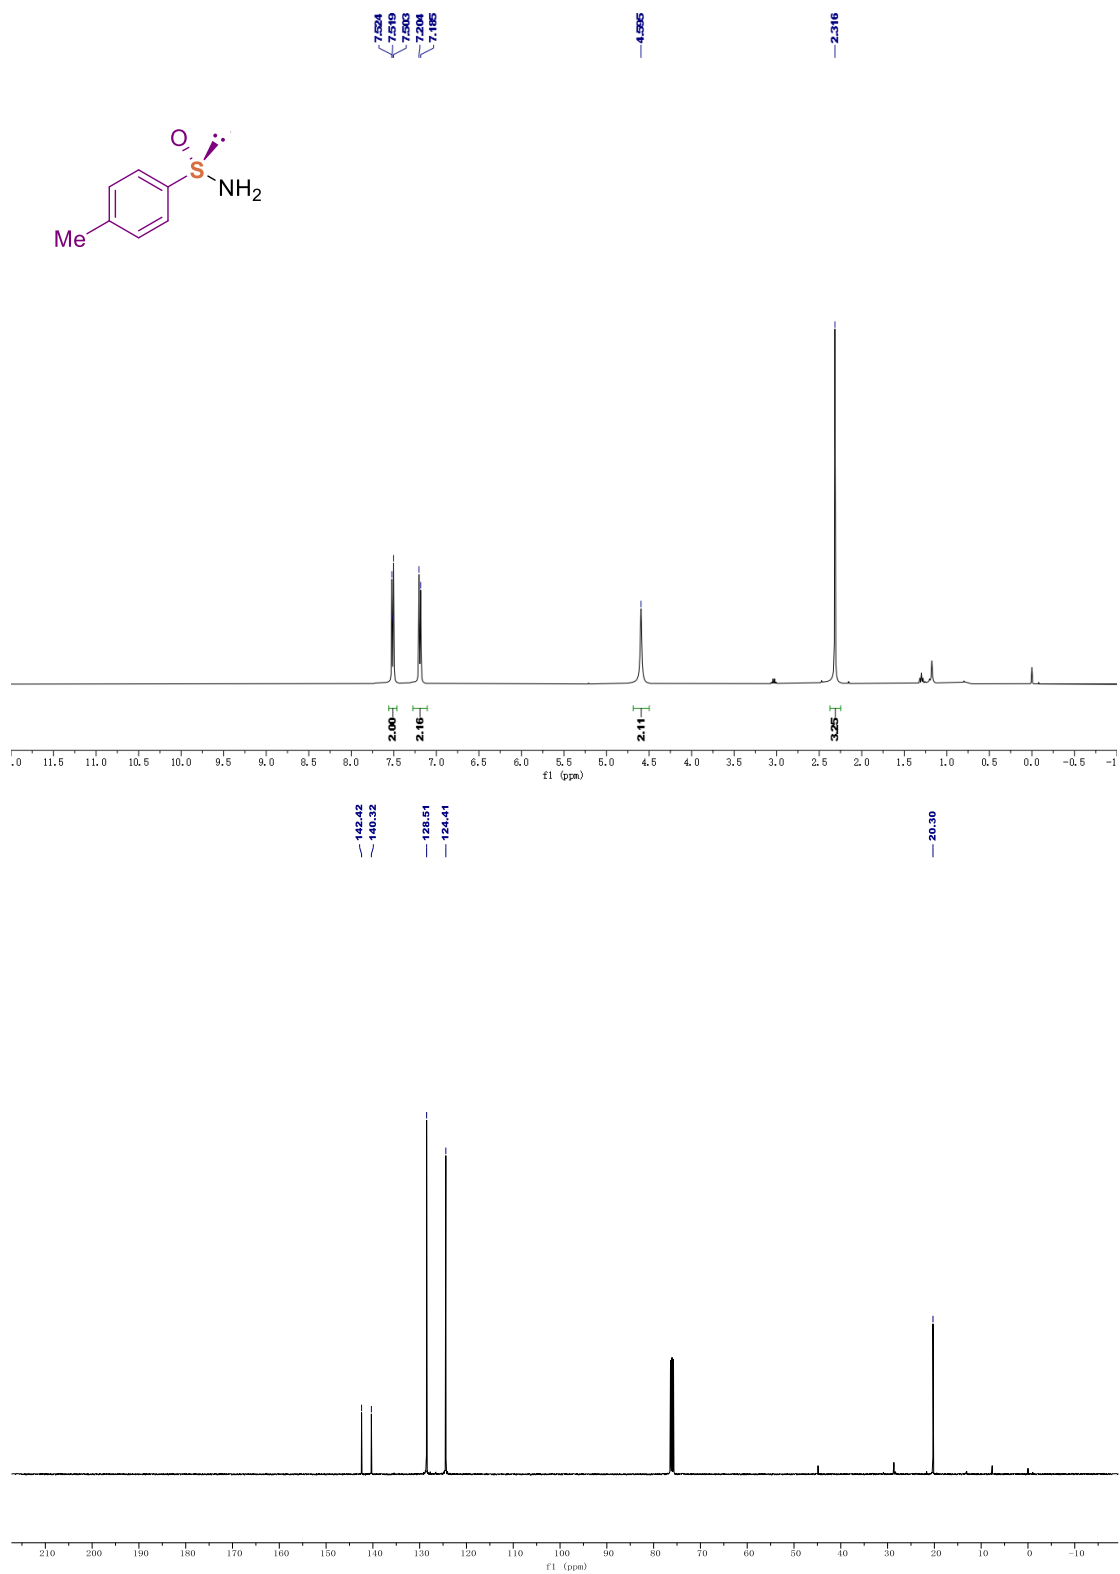

**(S)-Benzenesulfinamide (4b):**

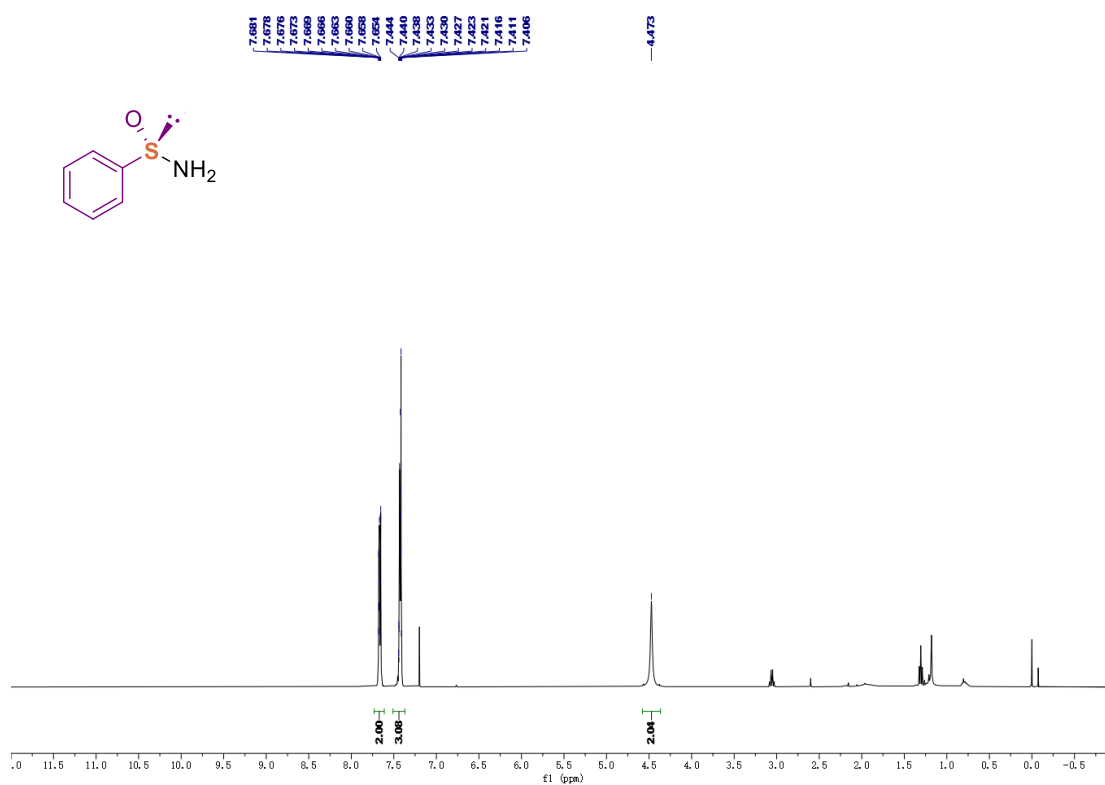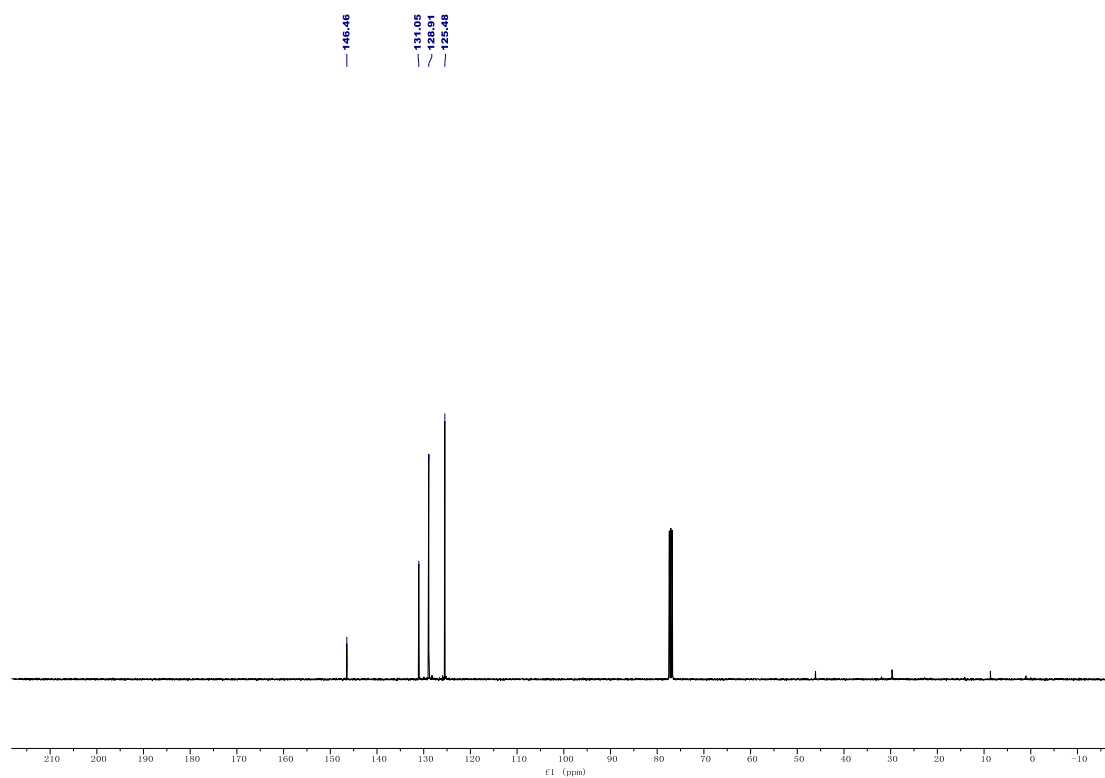



**(S)-4-Isopropylbenzenesulfonamide (4c):**

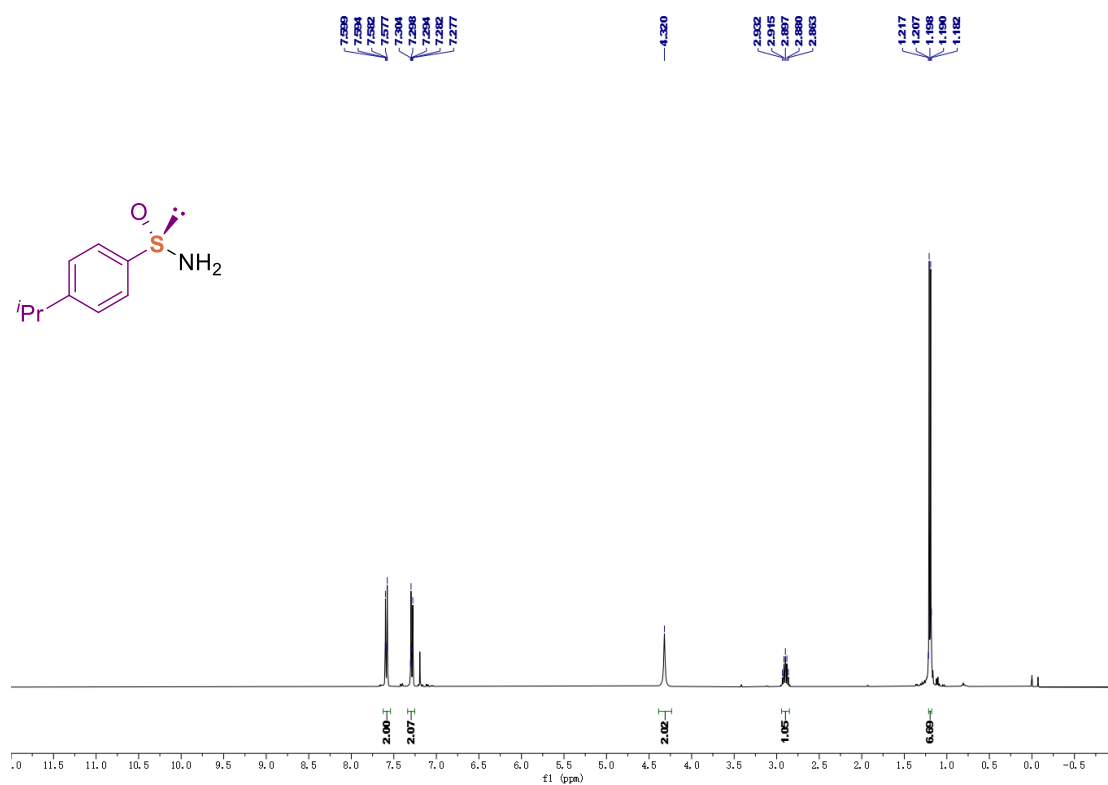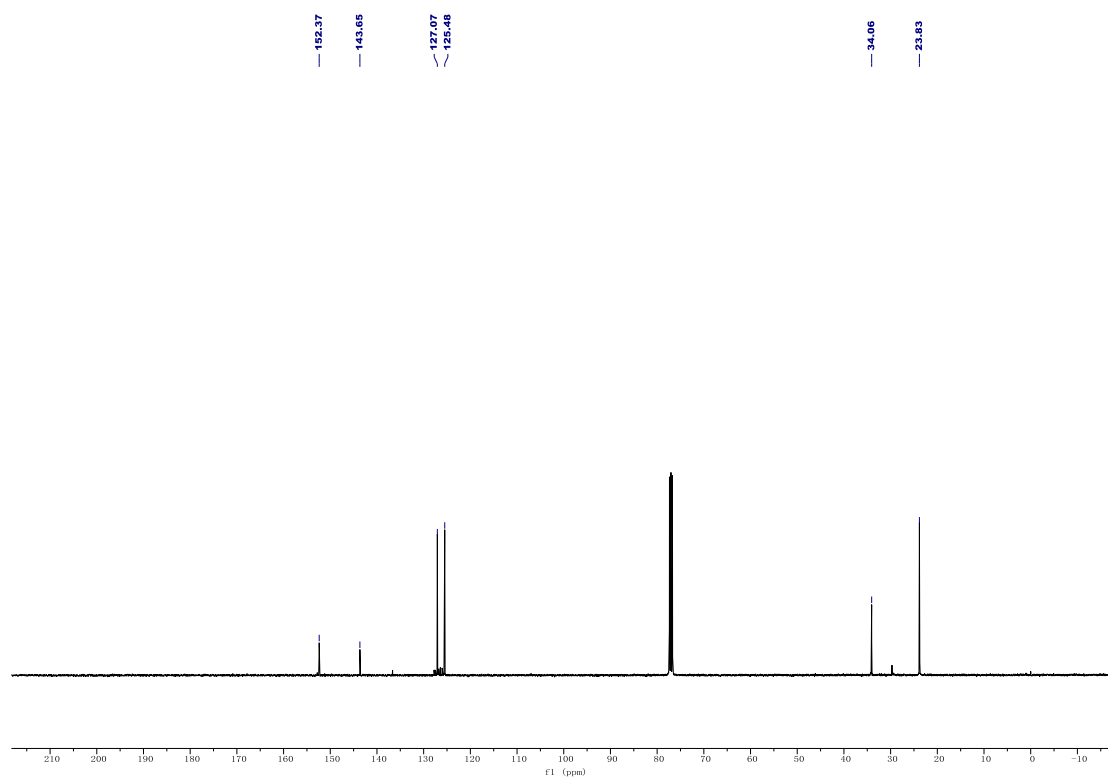

**(S)-4-Tert-butylbenzenesulfonamide (4d):**

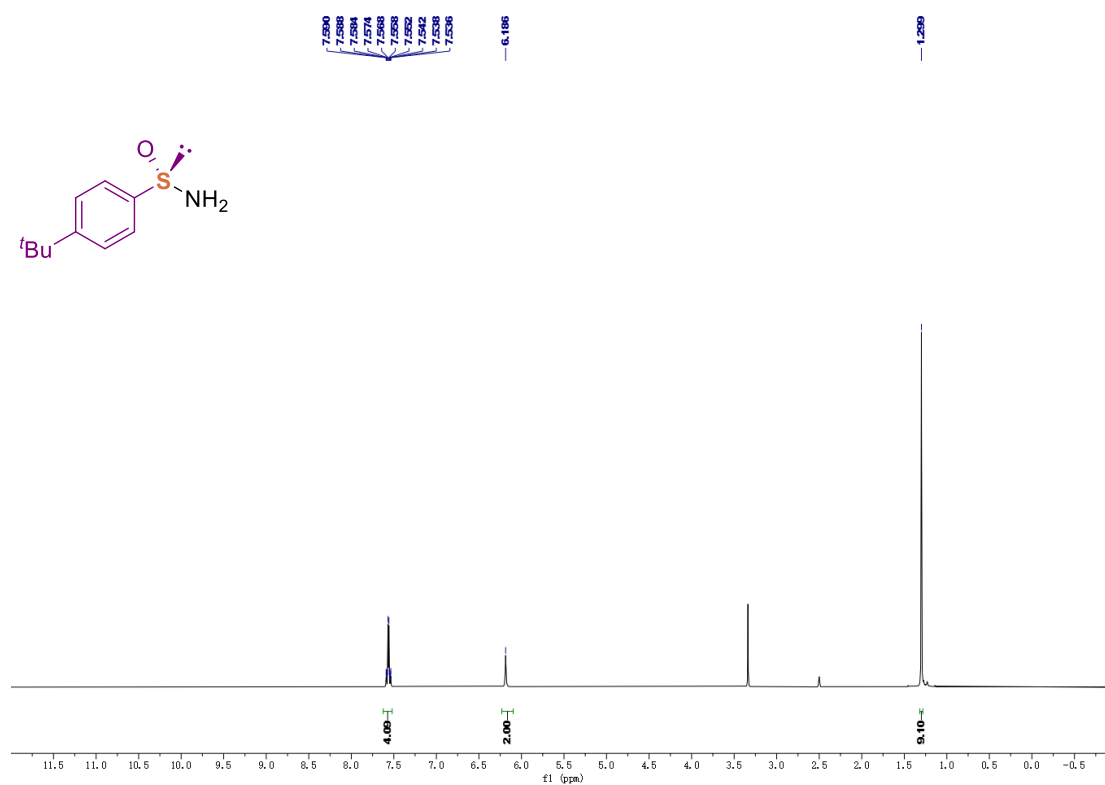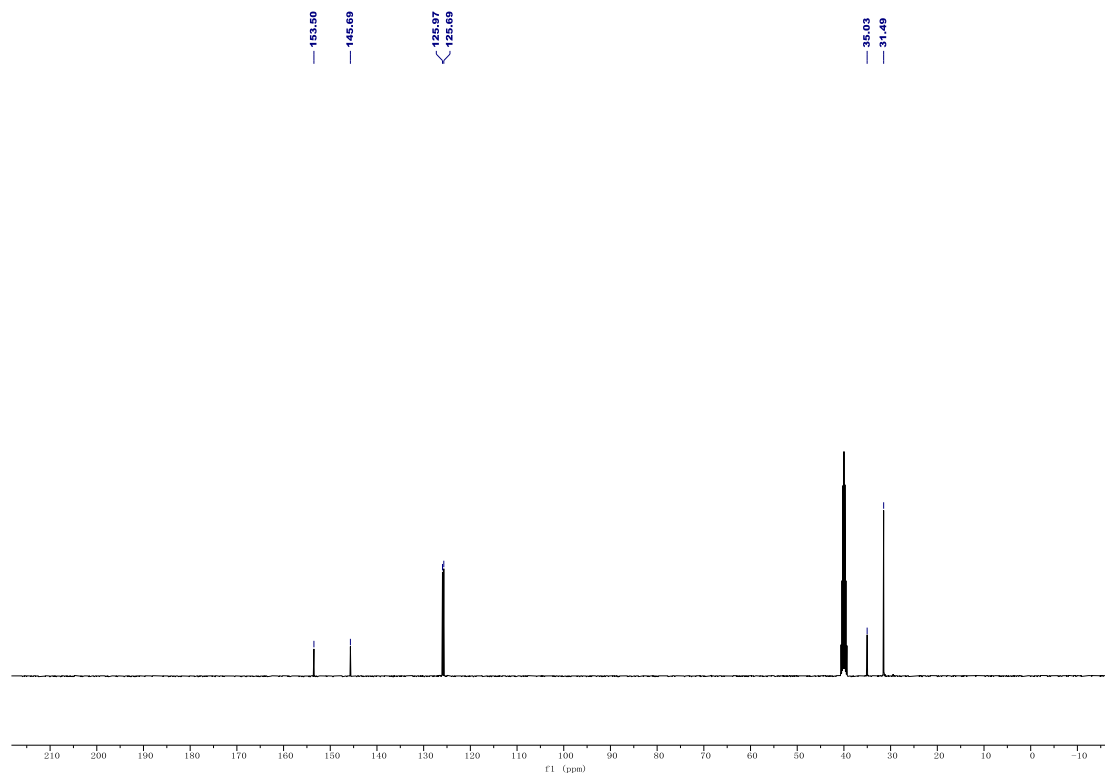

**(S)-[1,1'-Biphenyl]-4-sulfonamide (4e):**

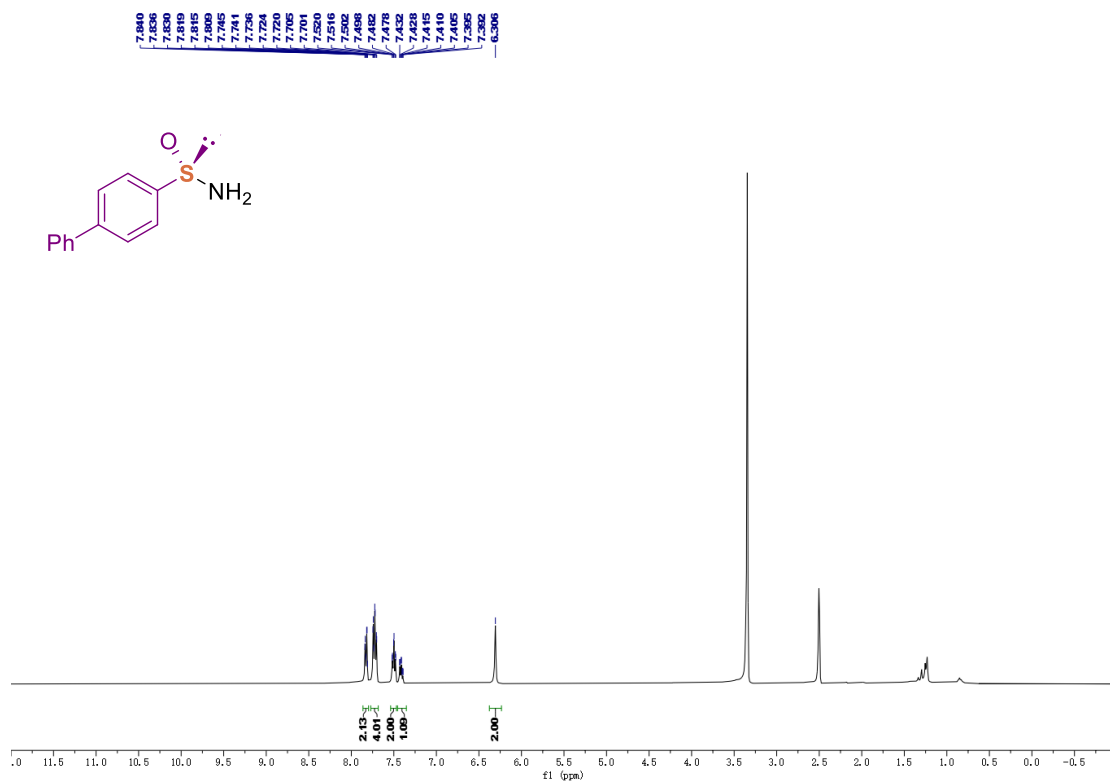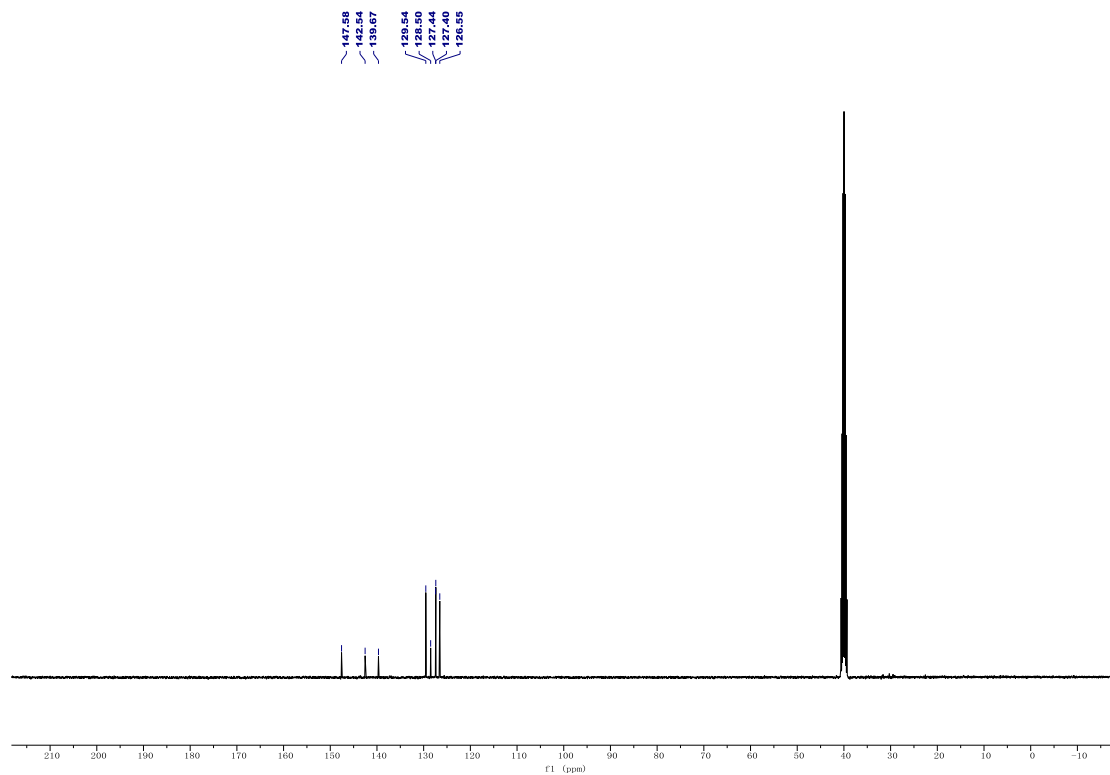

**(S)-4-Methoxybenzenesulfonamide (4f):**

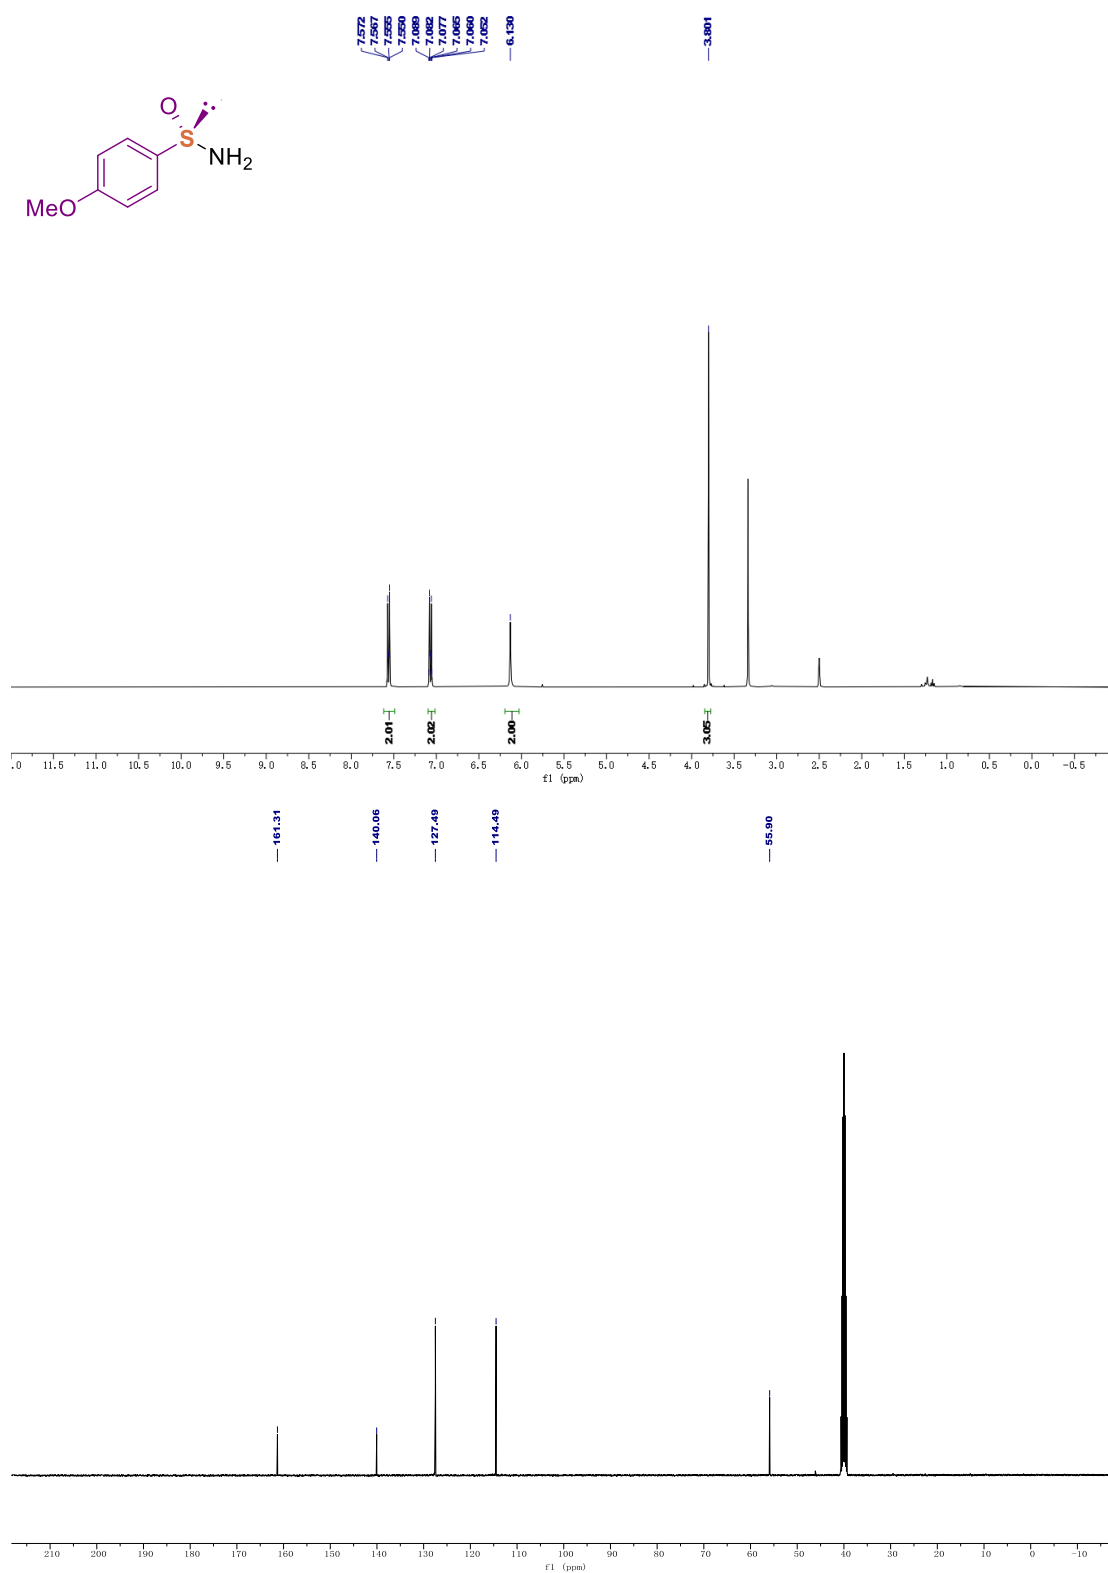

**(S)-4-Fluorobenzenesulfonamide (4g):**

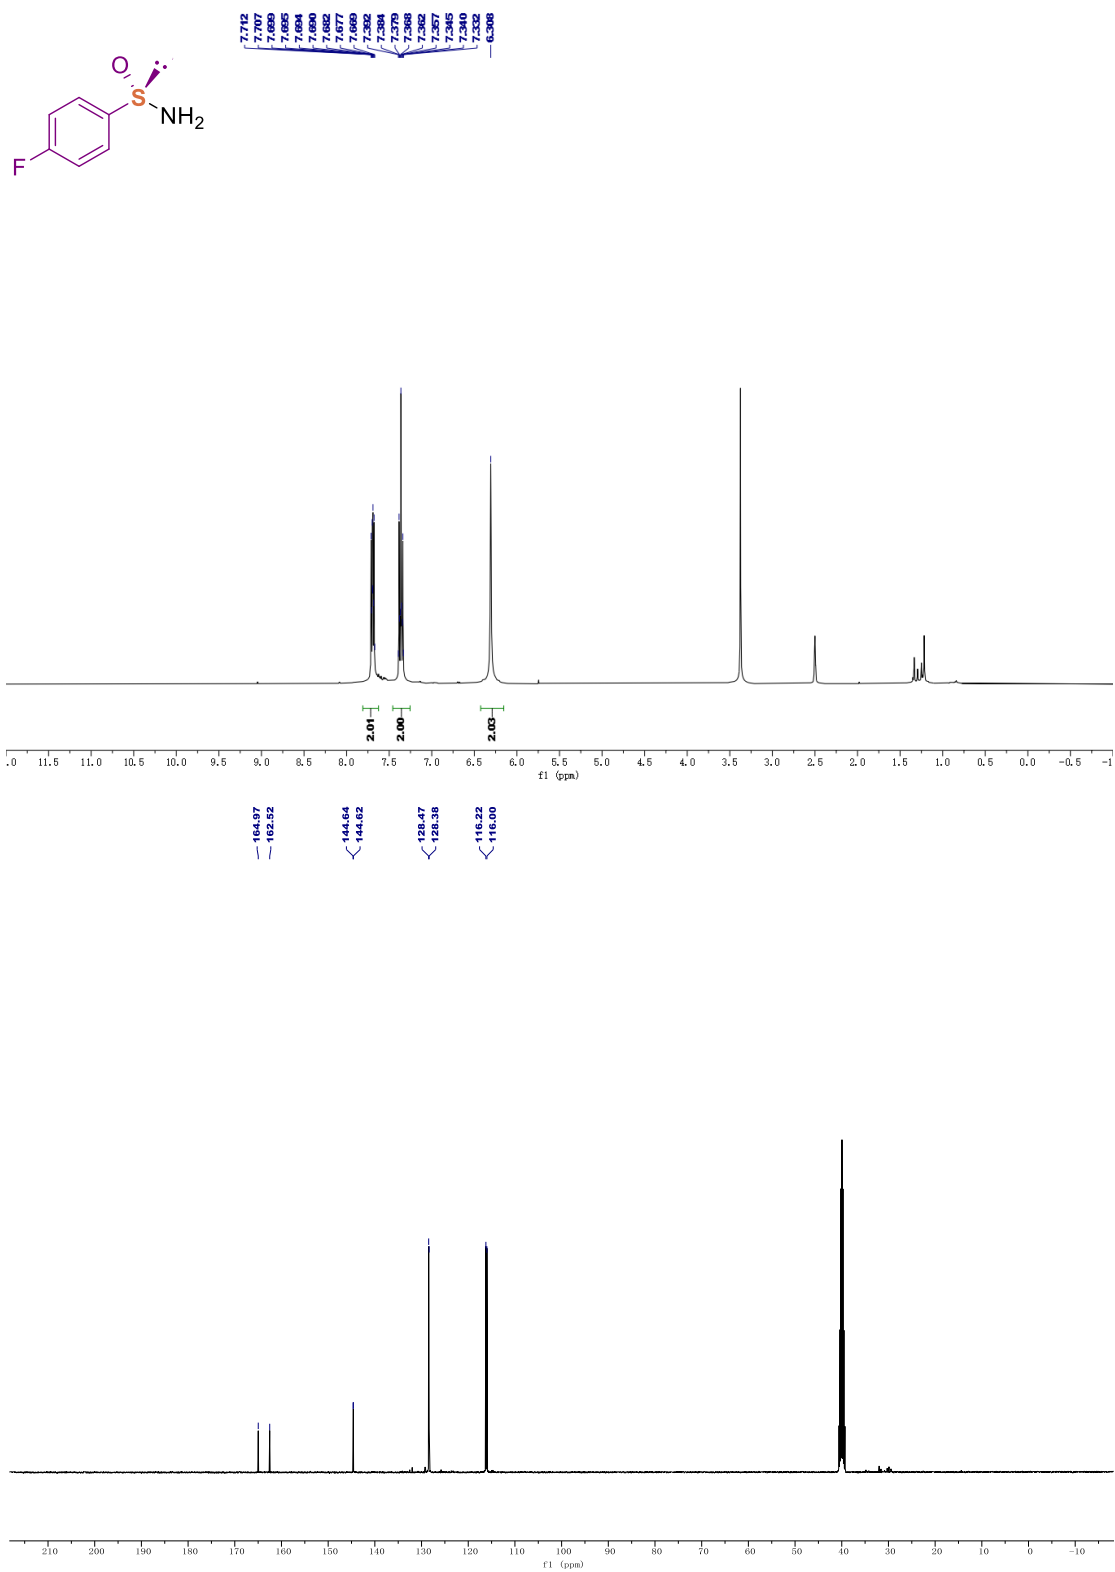

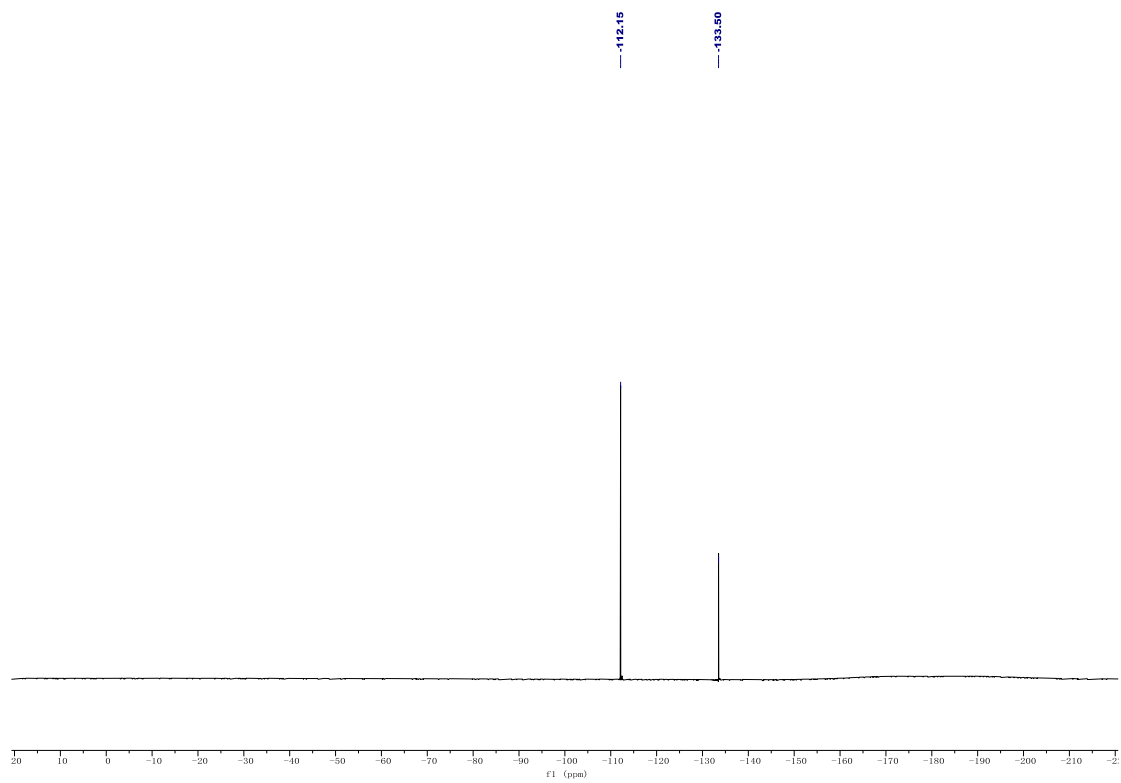

**(S)-4-Chlorobenzenesulfonamide (4h):**

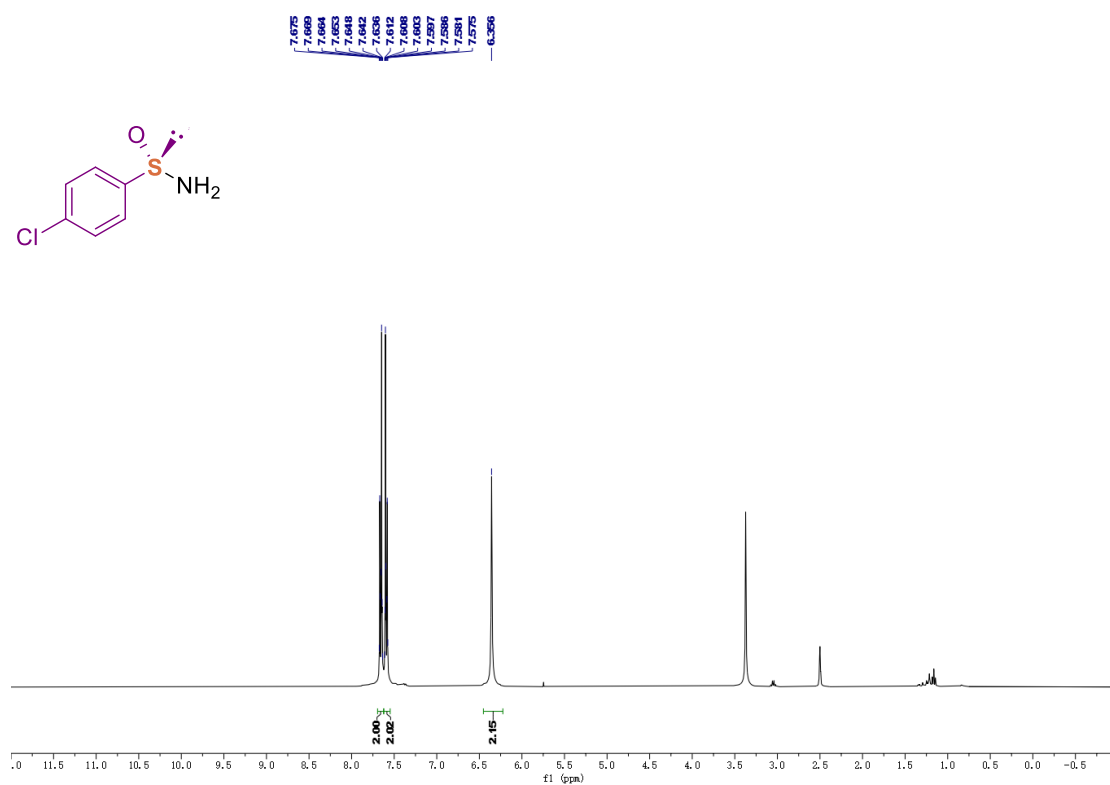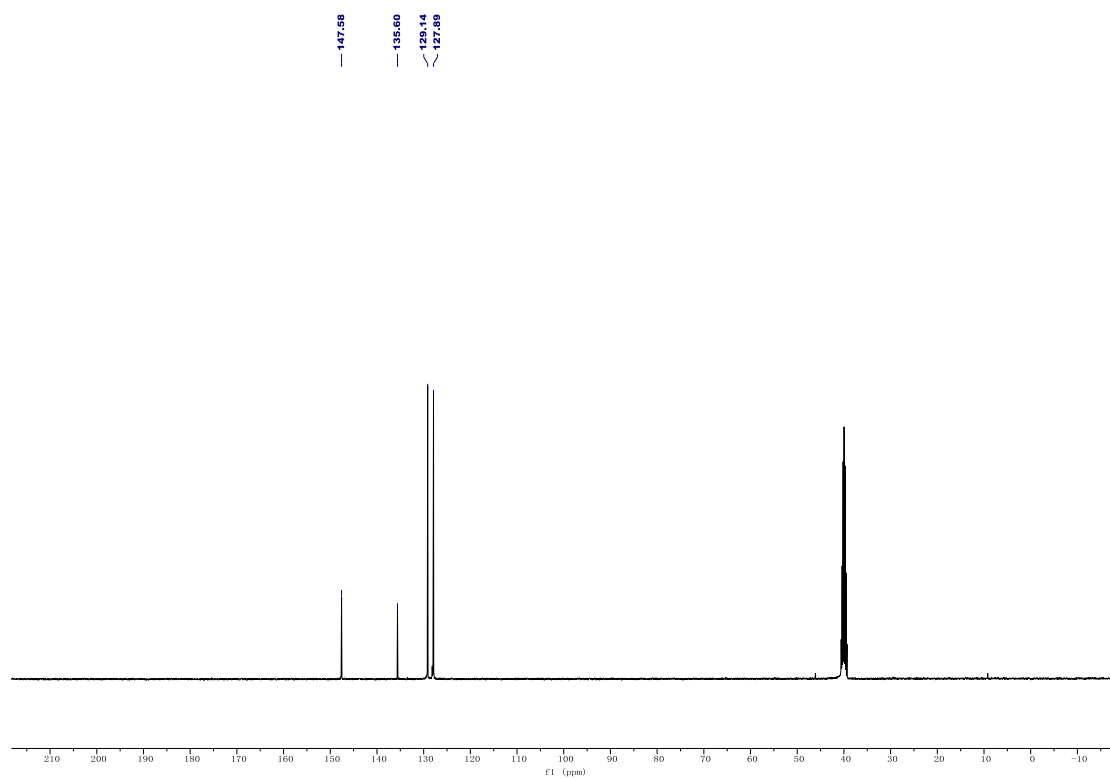

**(S)-4-Bromobenzenesulfonamide (4i):**

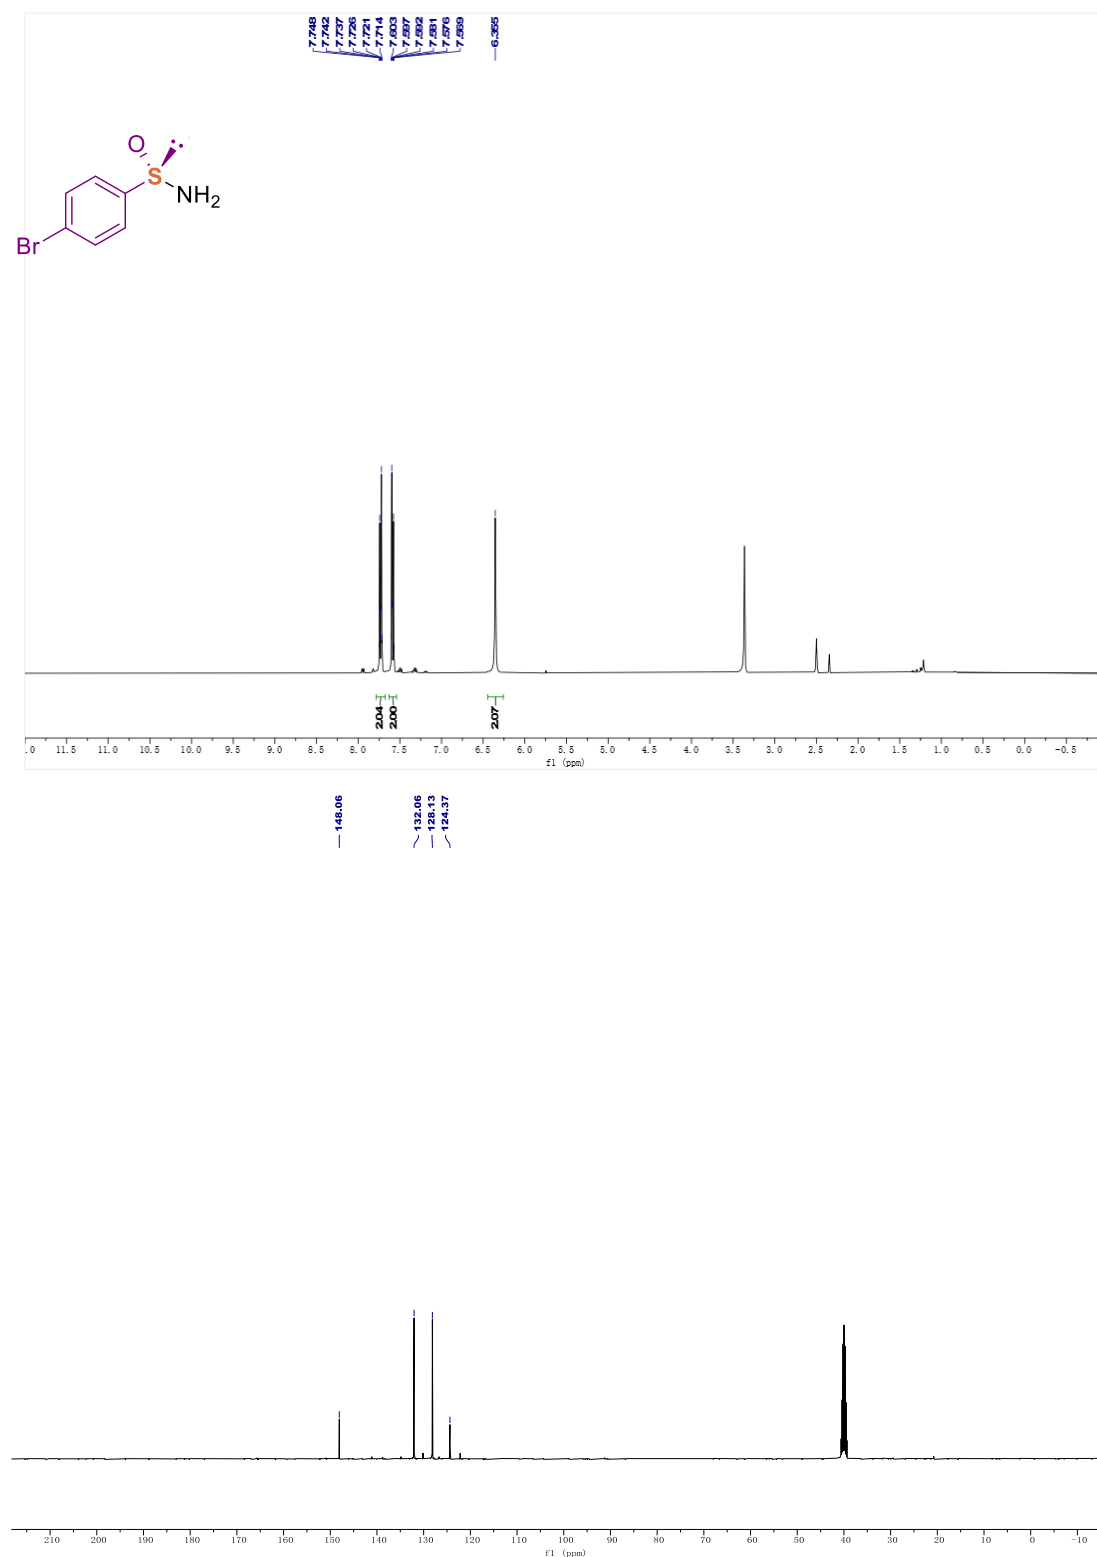



**(S)-4-Iodobenzenesulfinamide (4j):**

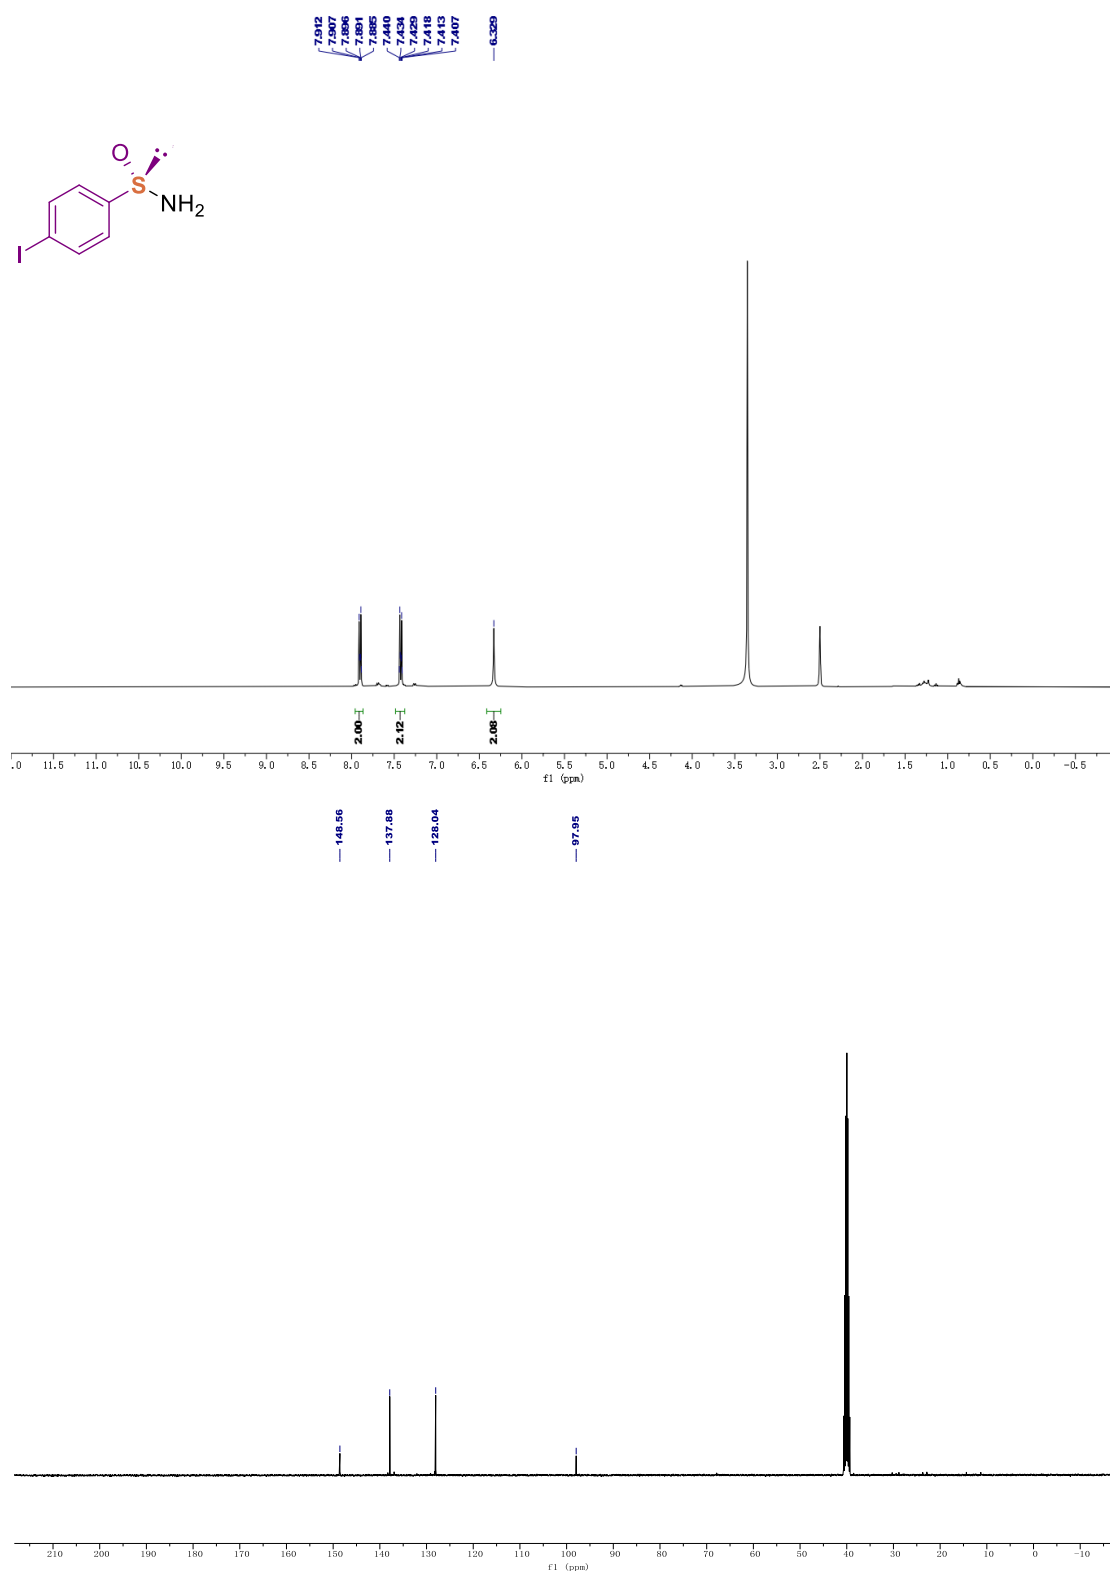

**(S)-4-Trifluoromethylbenzenesulfonamide (4k):**

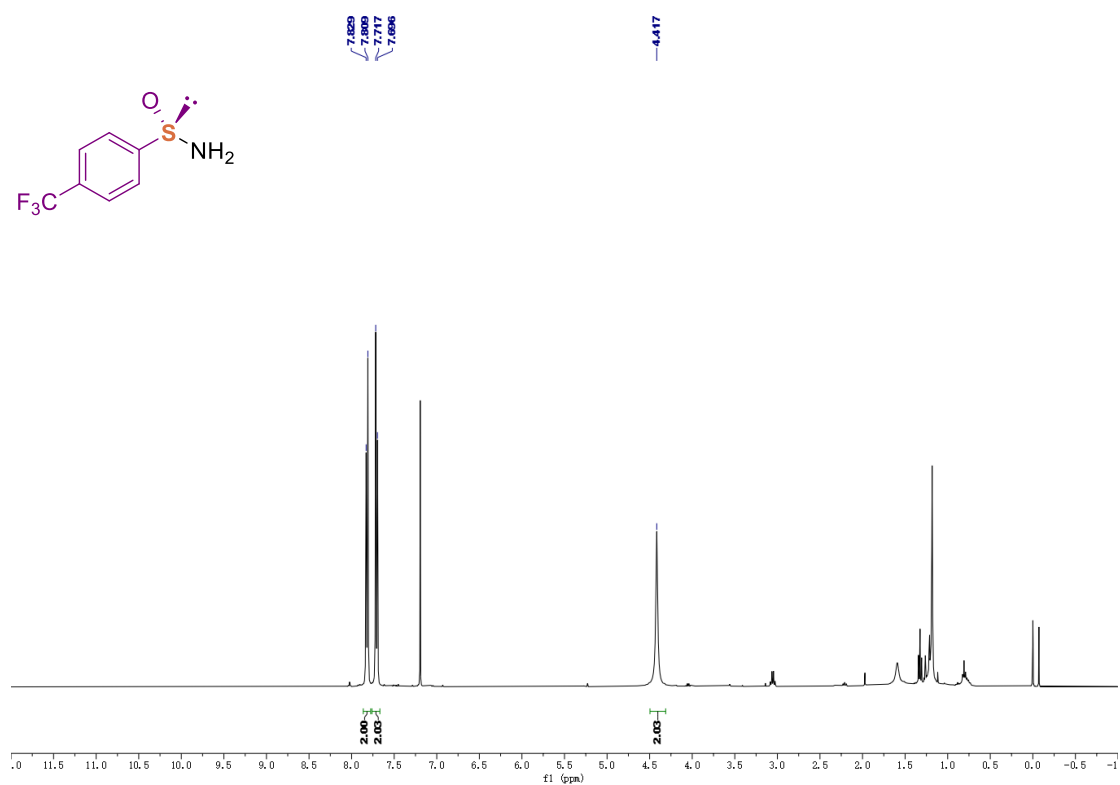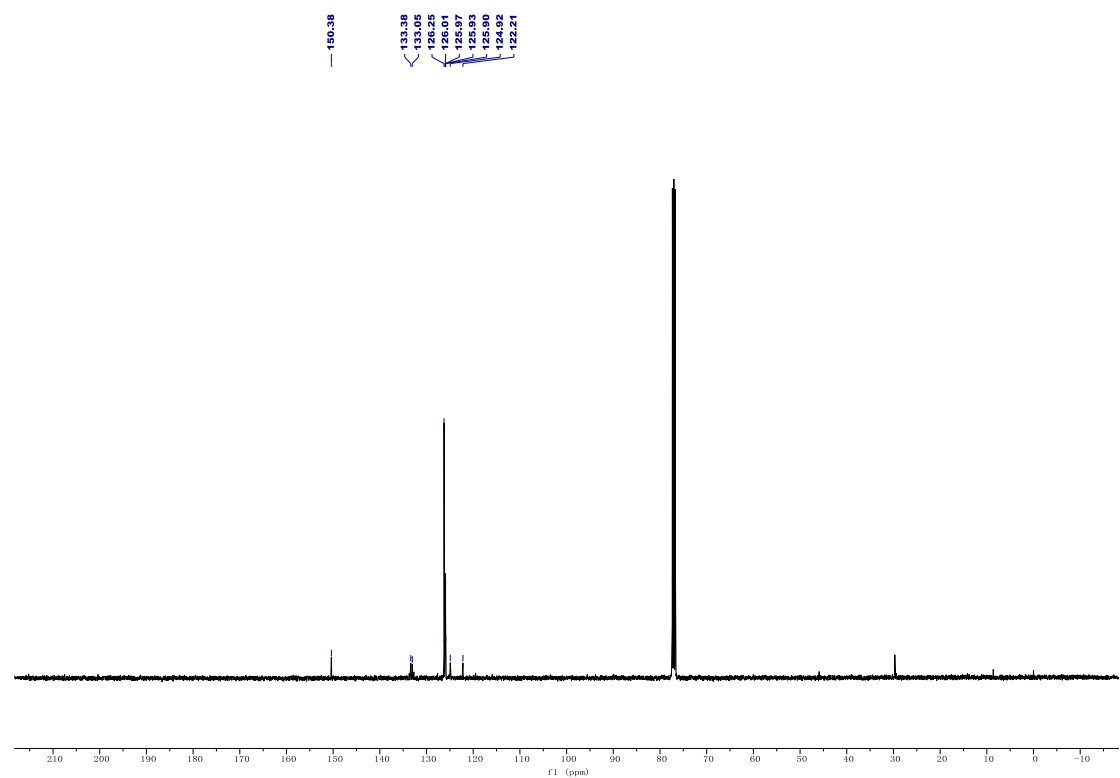

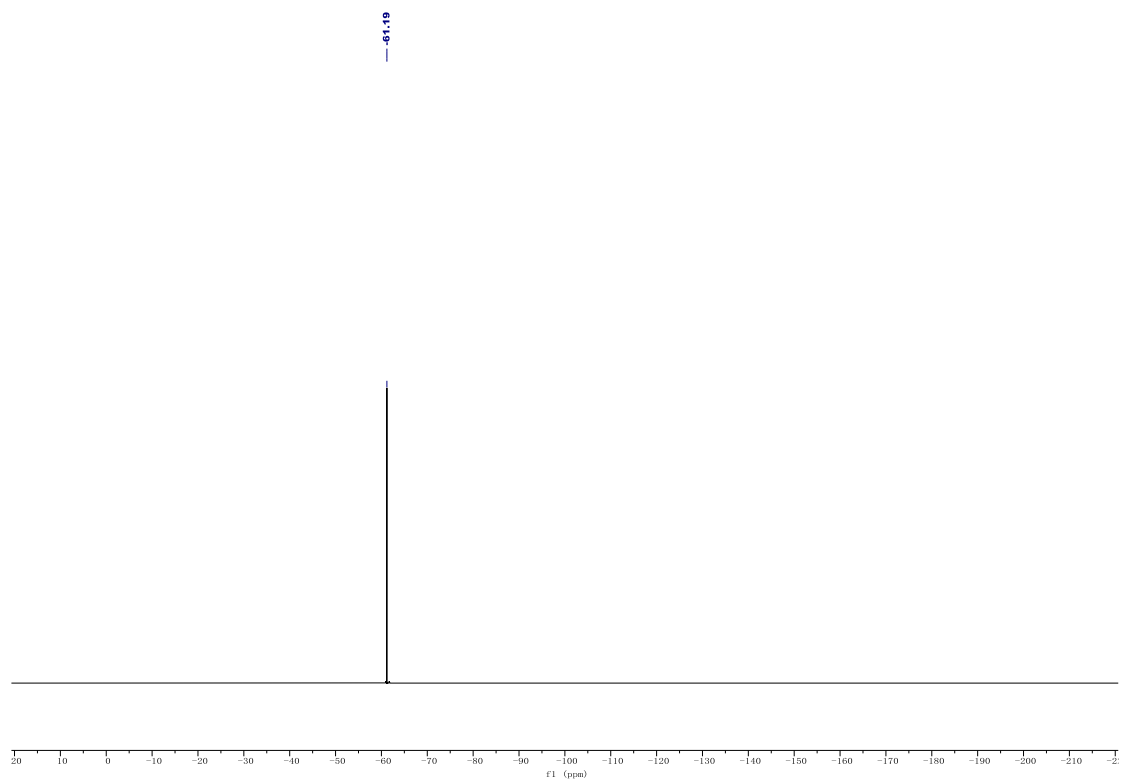

**(S)-4-Methylbenzenesulfonamide (4l):**

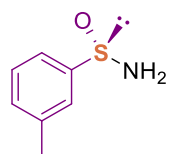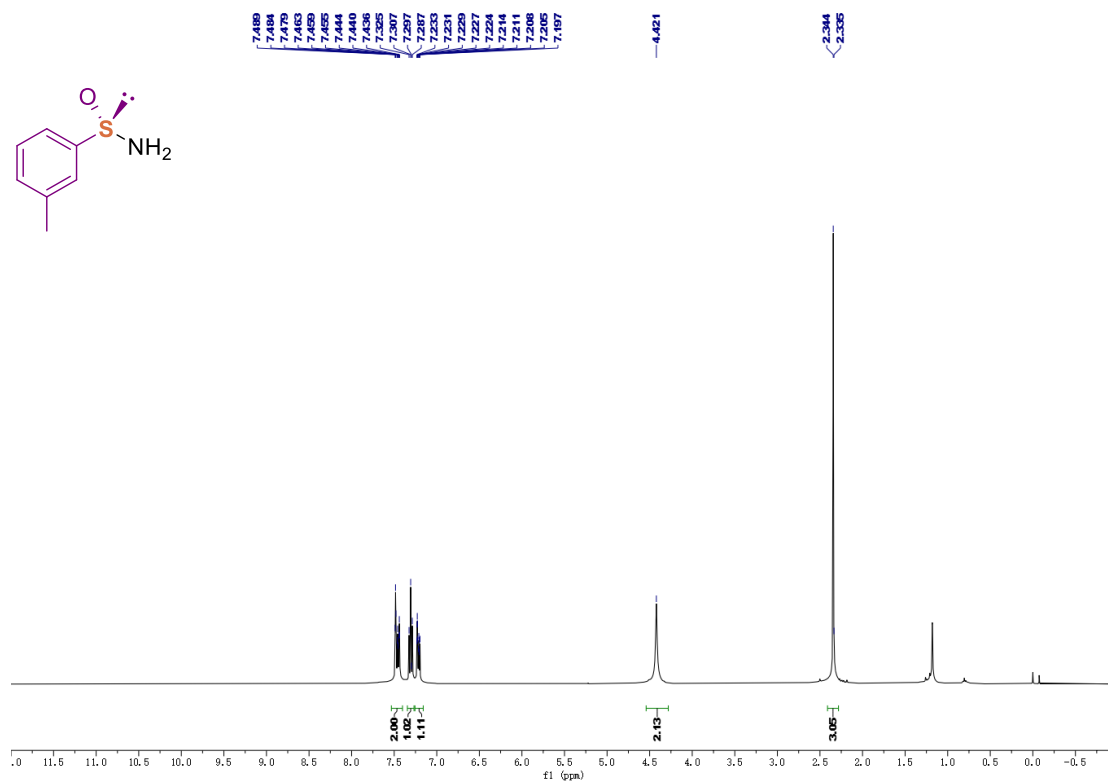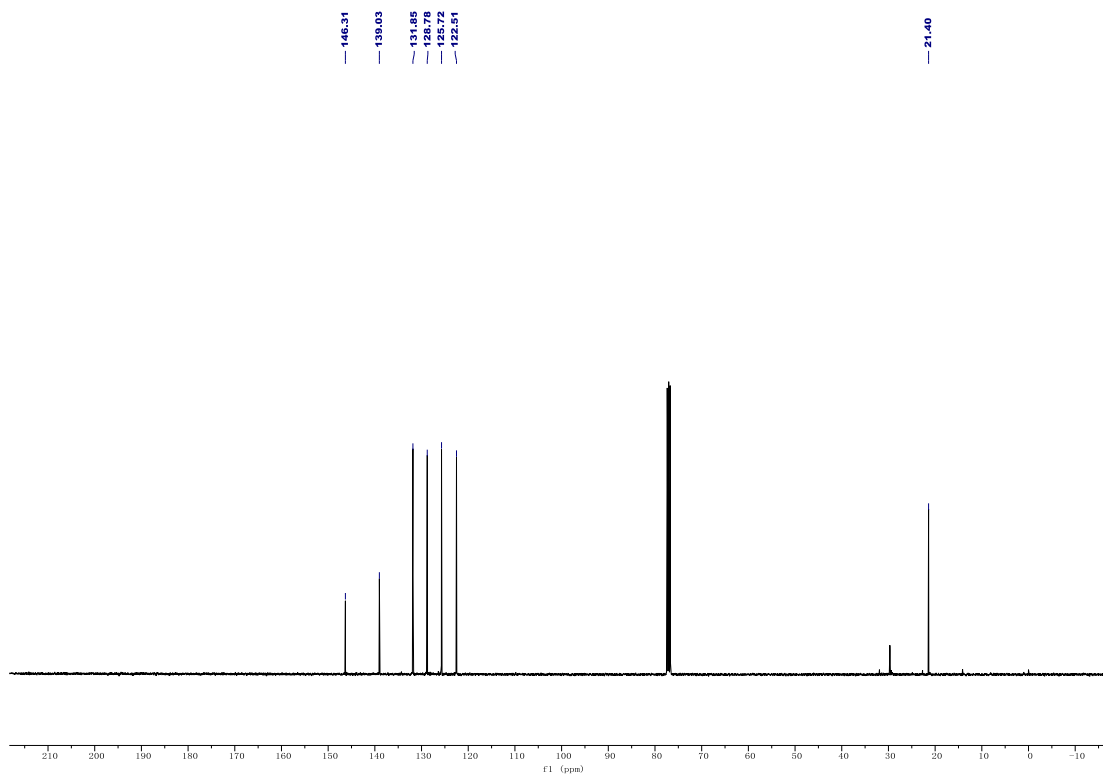

**(S)-3-Chlorobenzenesulfonamide (4m):**

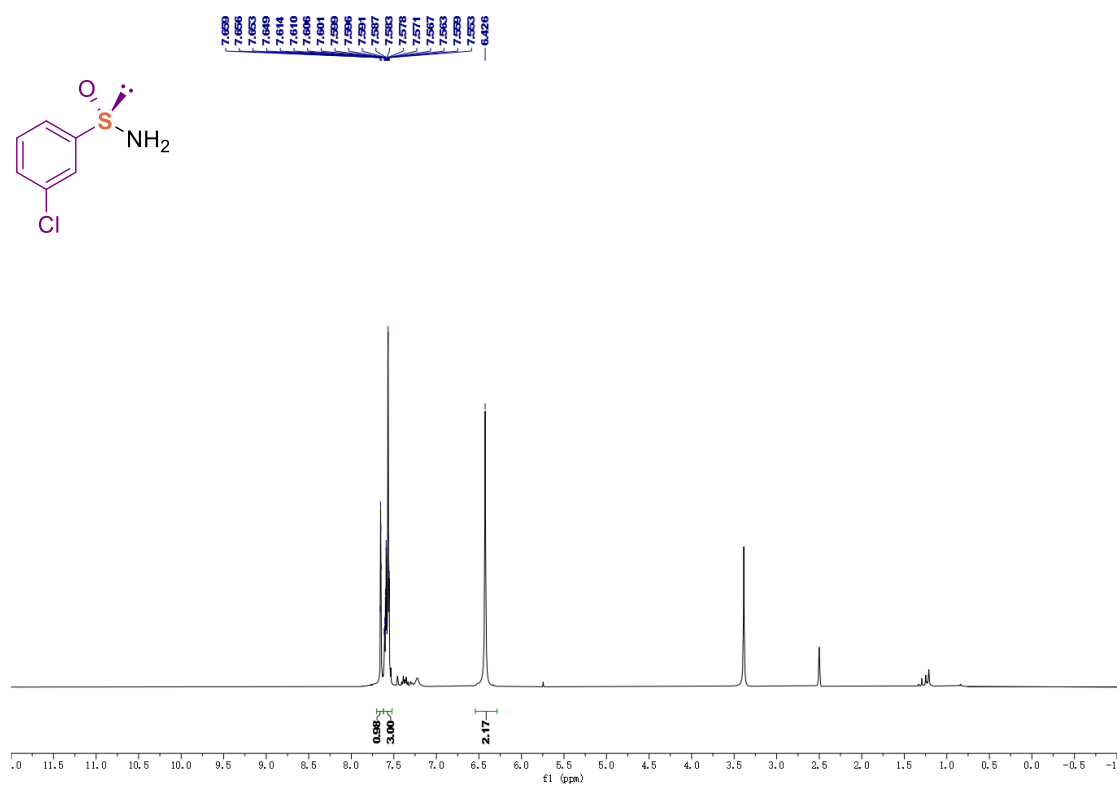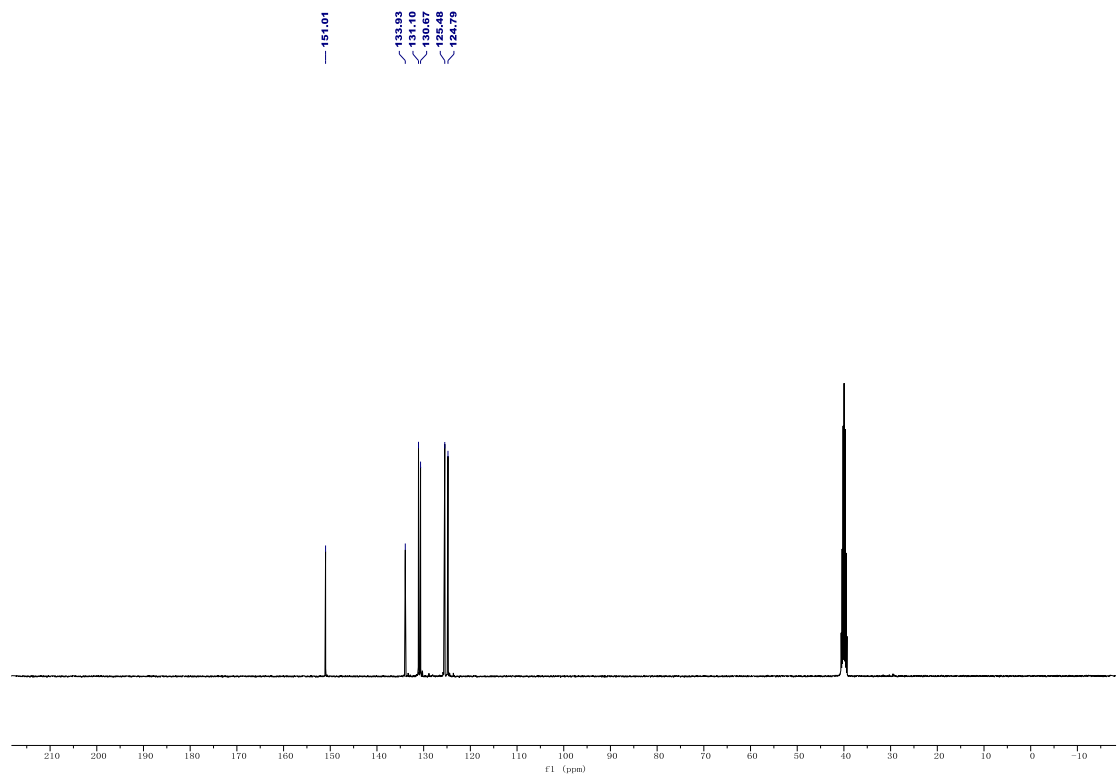

**(S)-2-Methylbenzenesulfonamide (4n):**

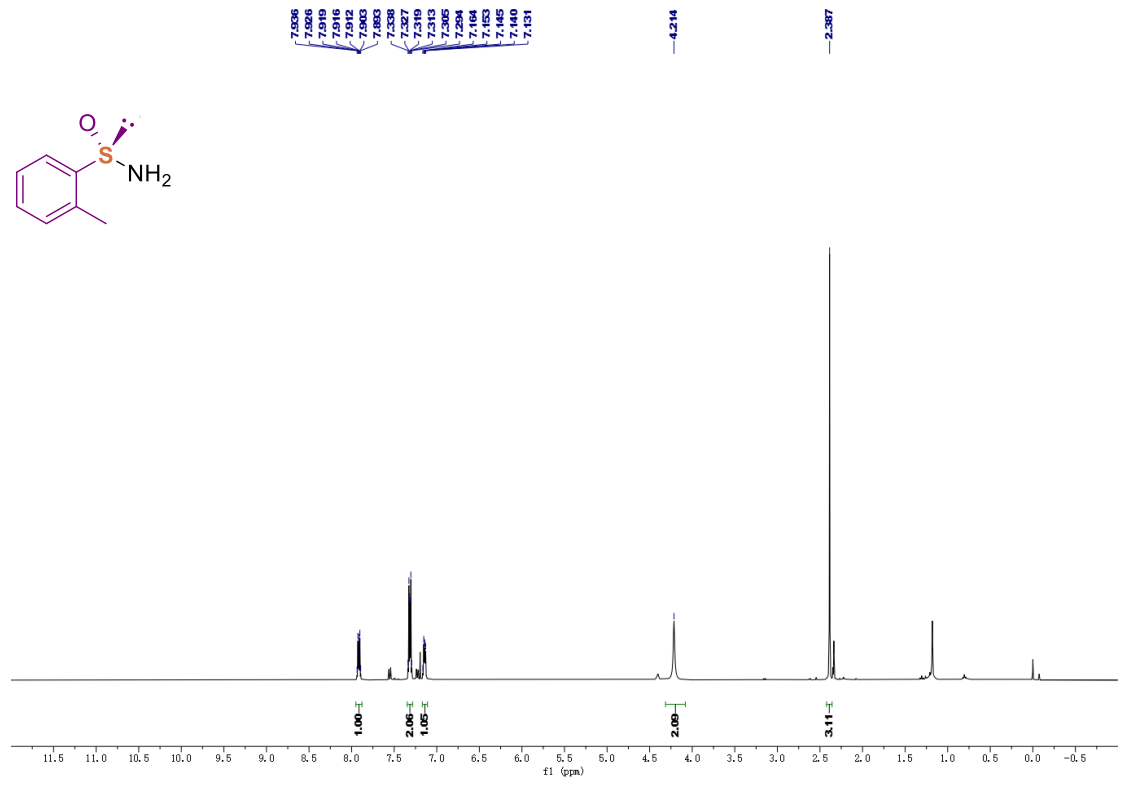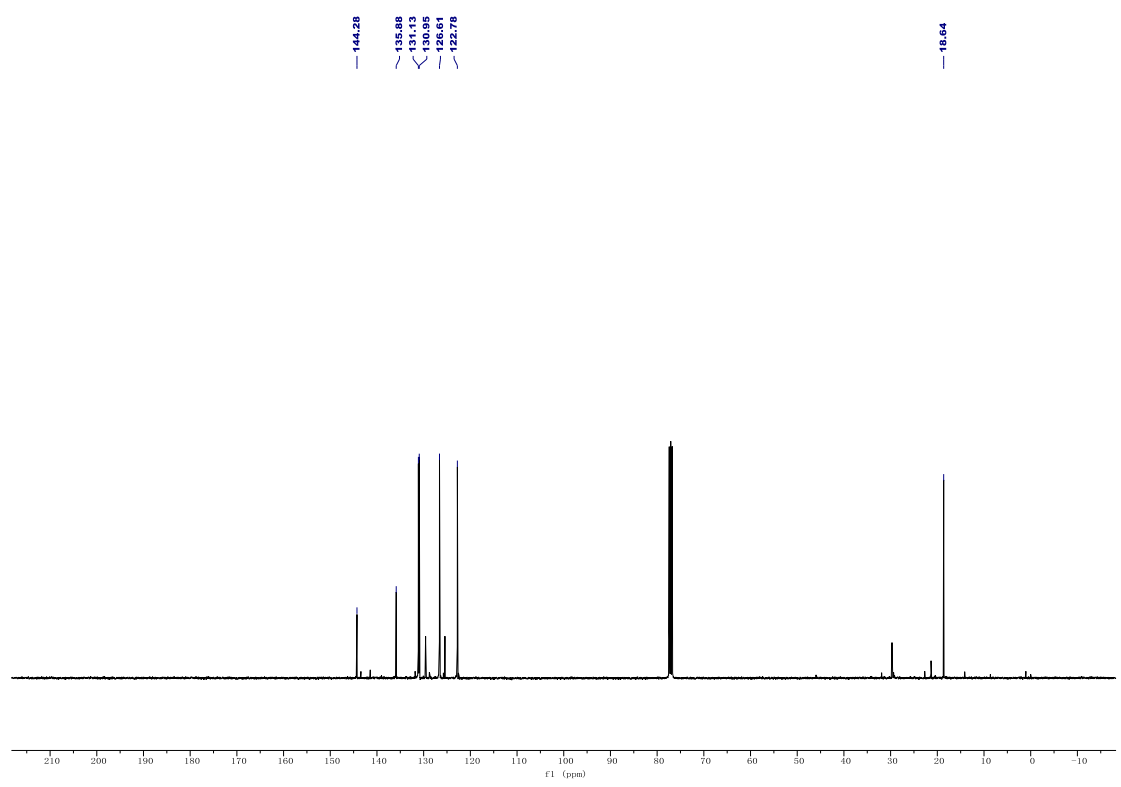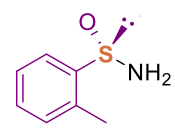

**(S)-2-Methoxybenzenesulfonamide (4o):**

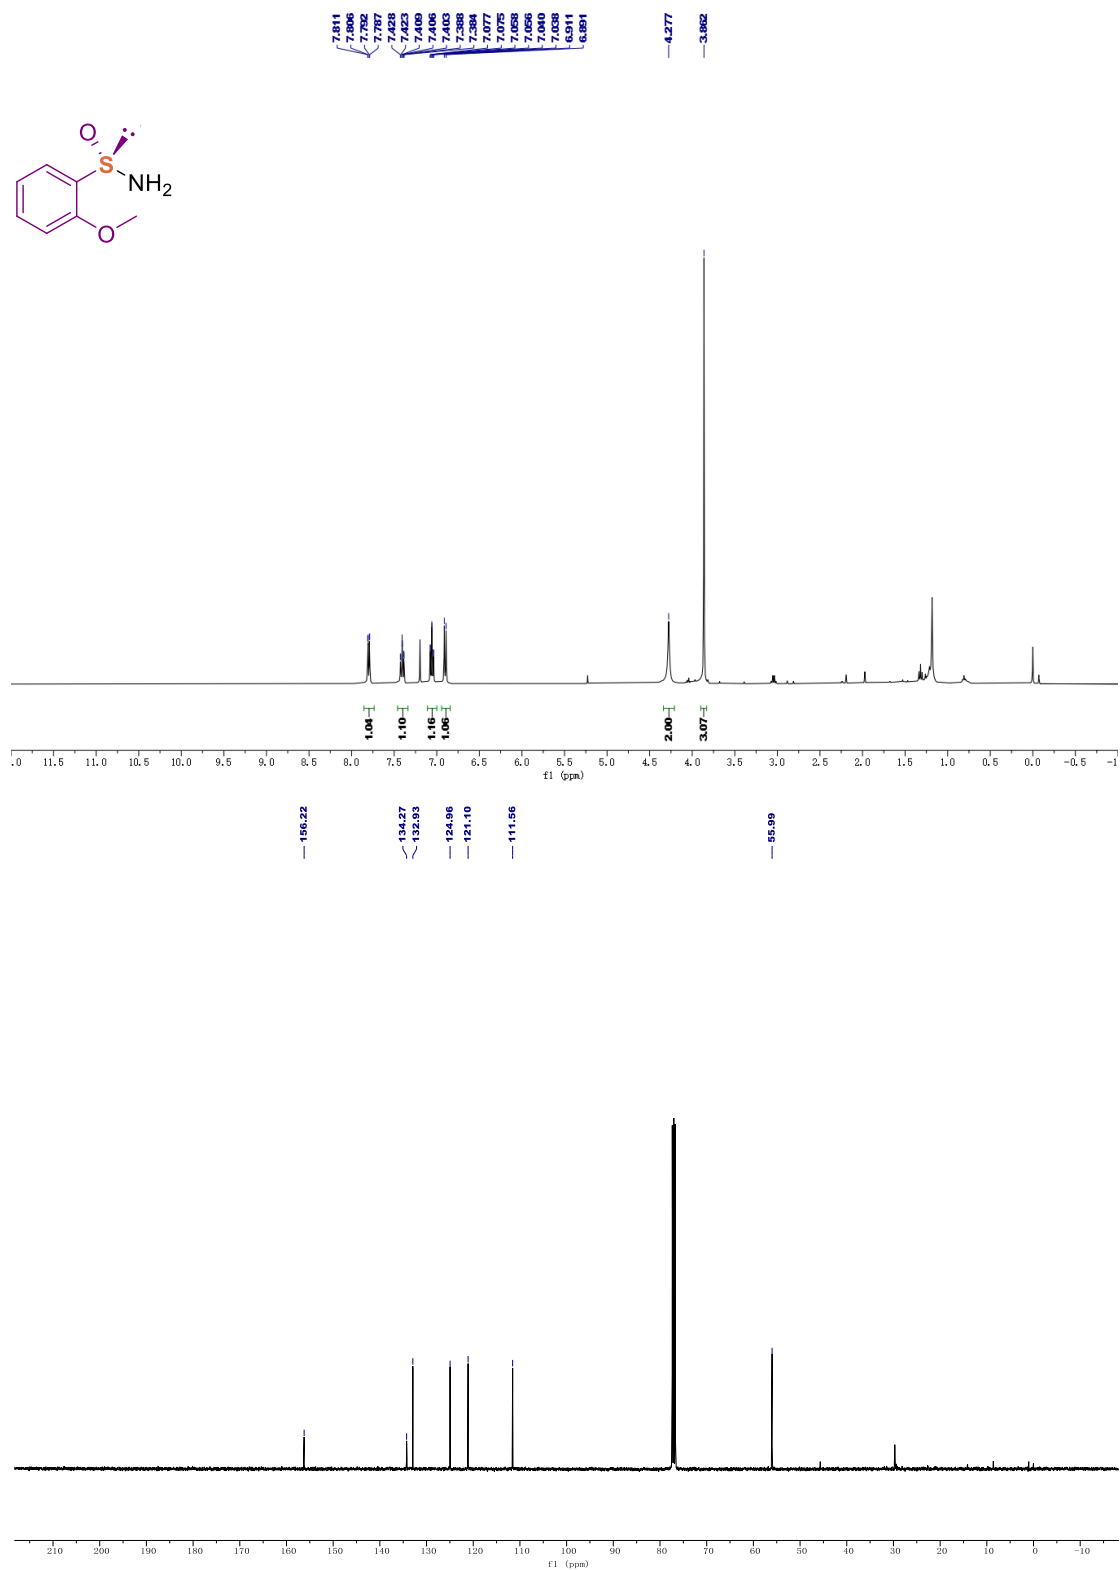

**(S)-2-Fluorobenzenesulfonamide(4p):**

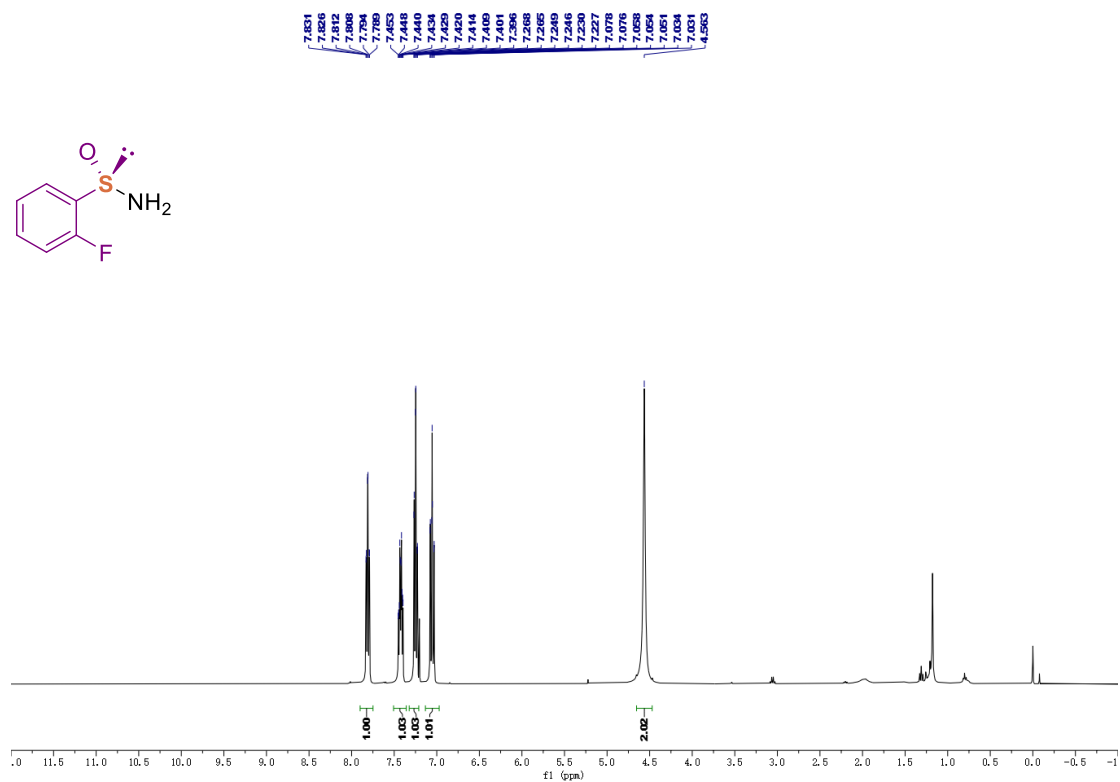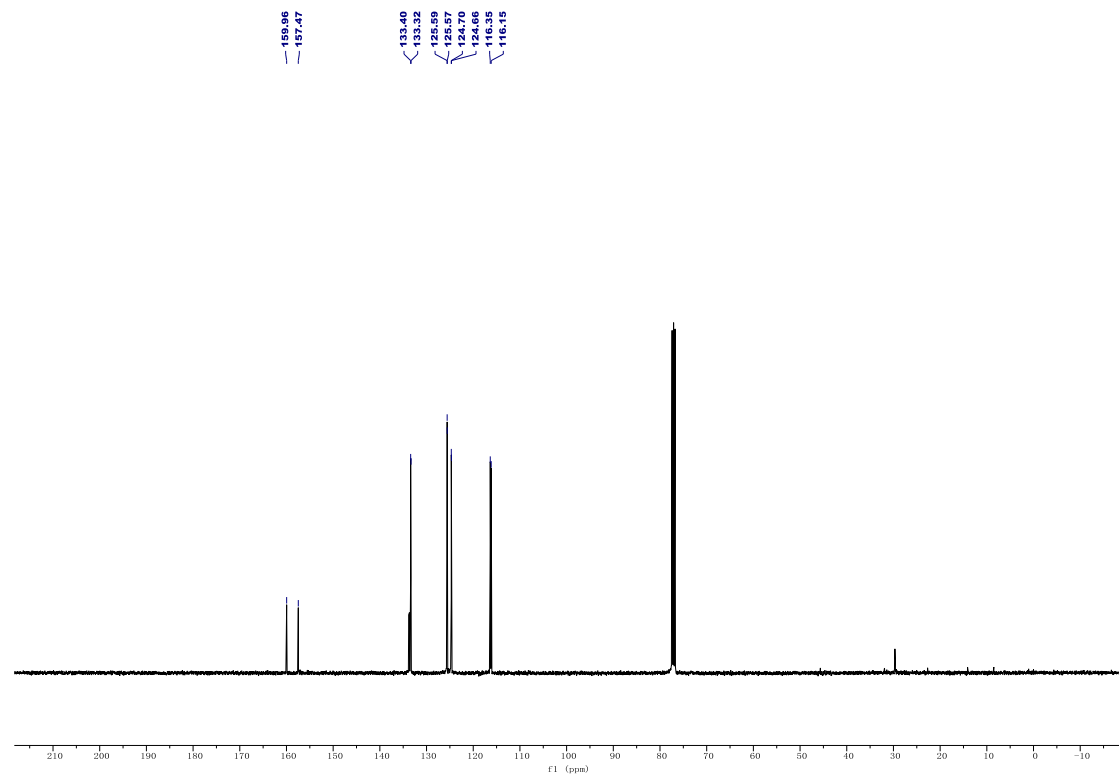



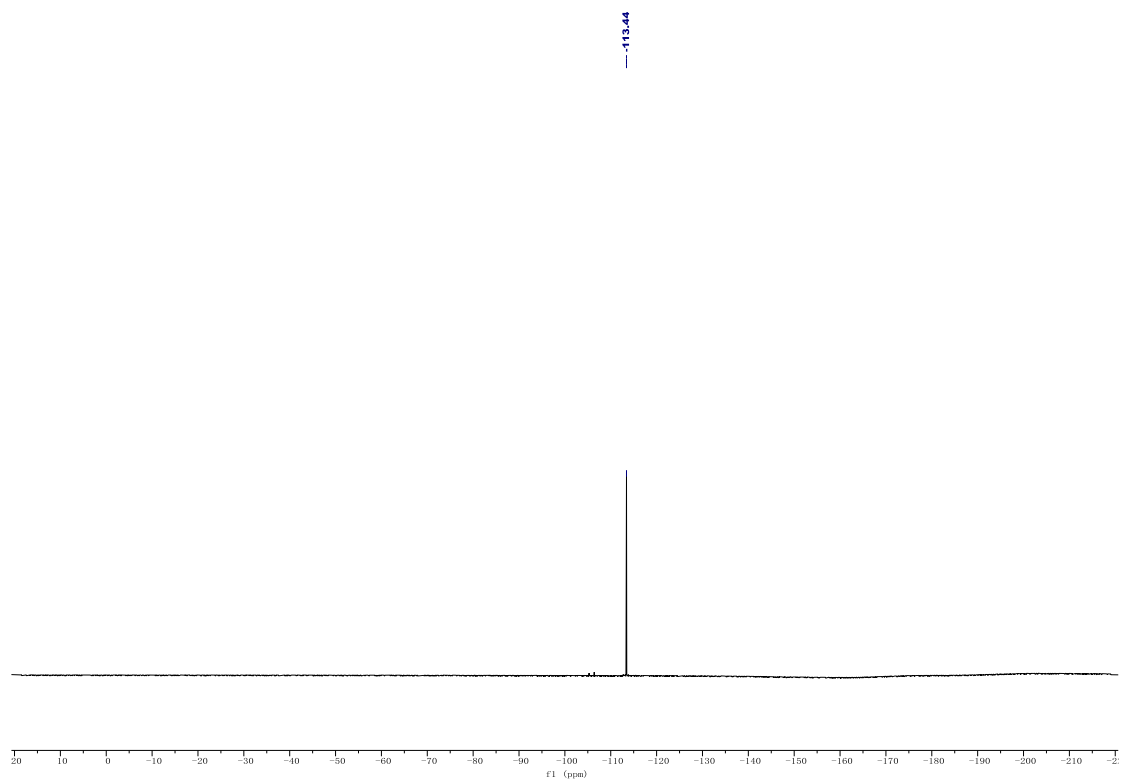

**(S)-2,5-Dimethoxybenzenesulfonamide (4q):**

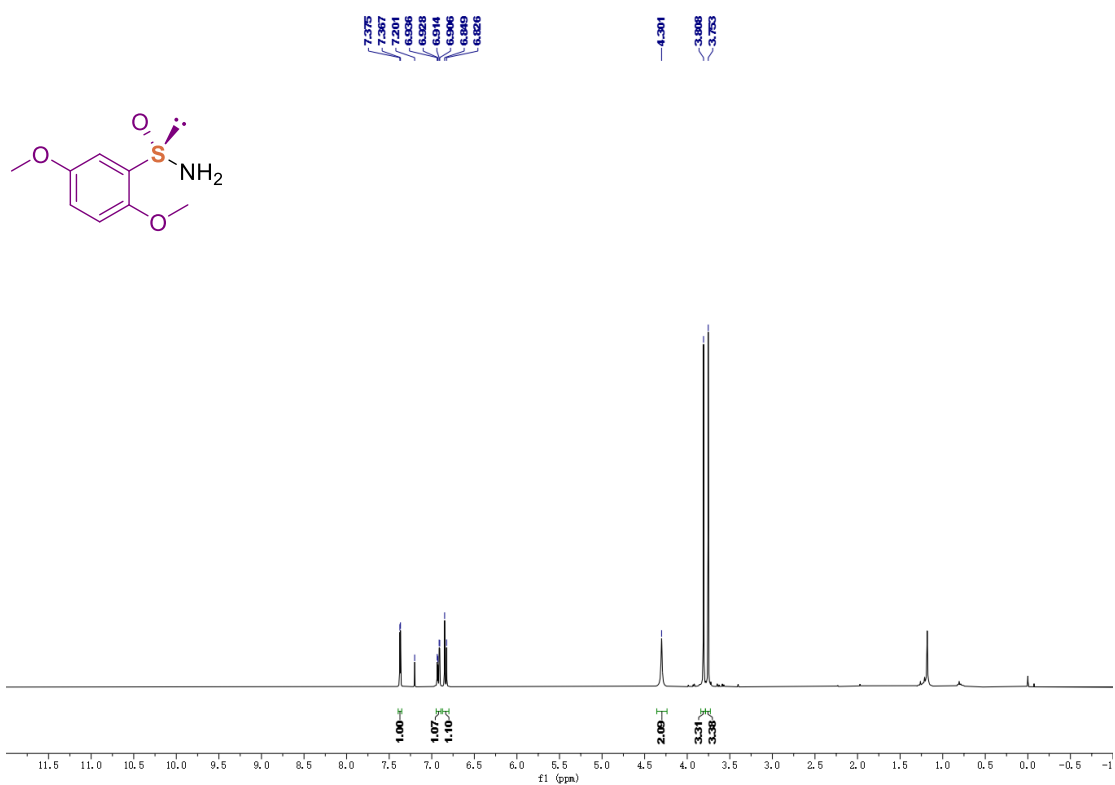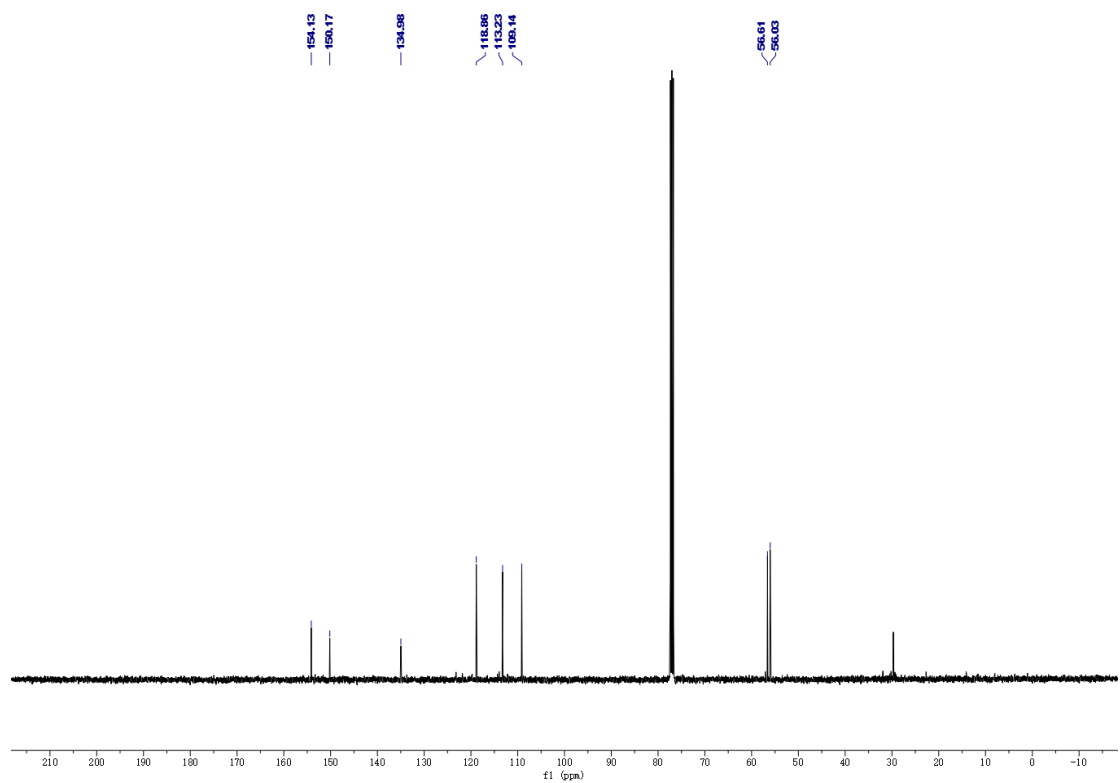

**(S)-2,4,6-Trimethylbenzenesulfonamide (4r):**

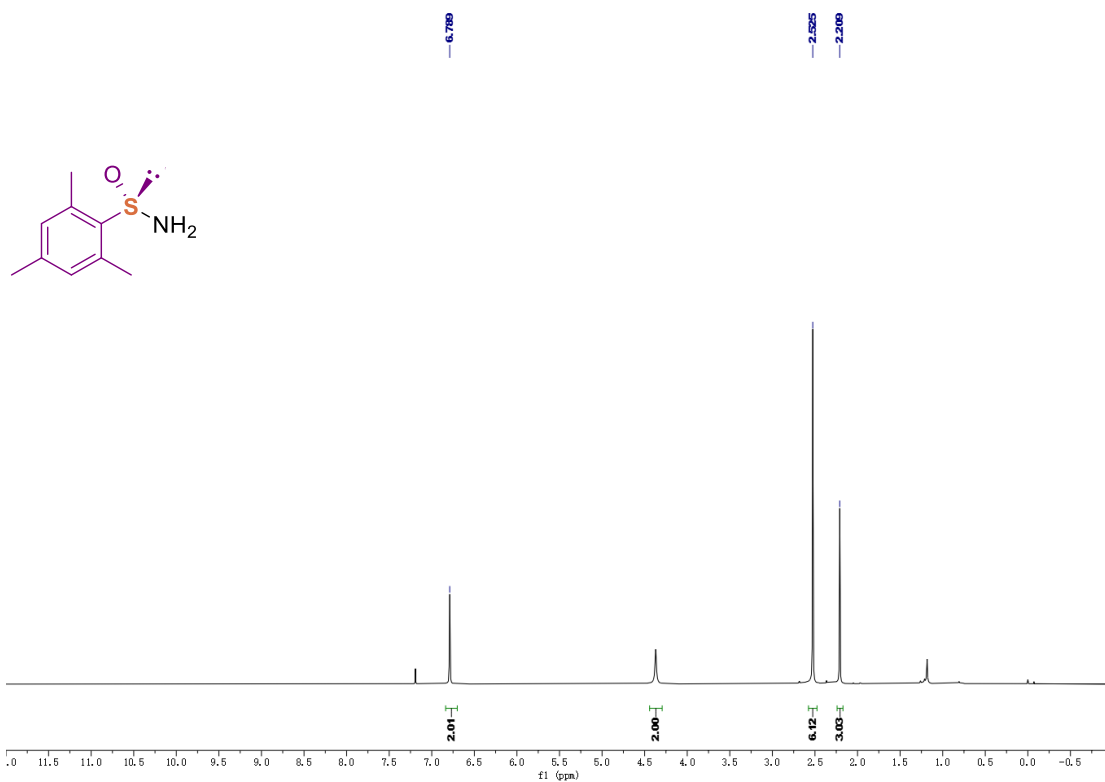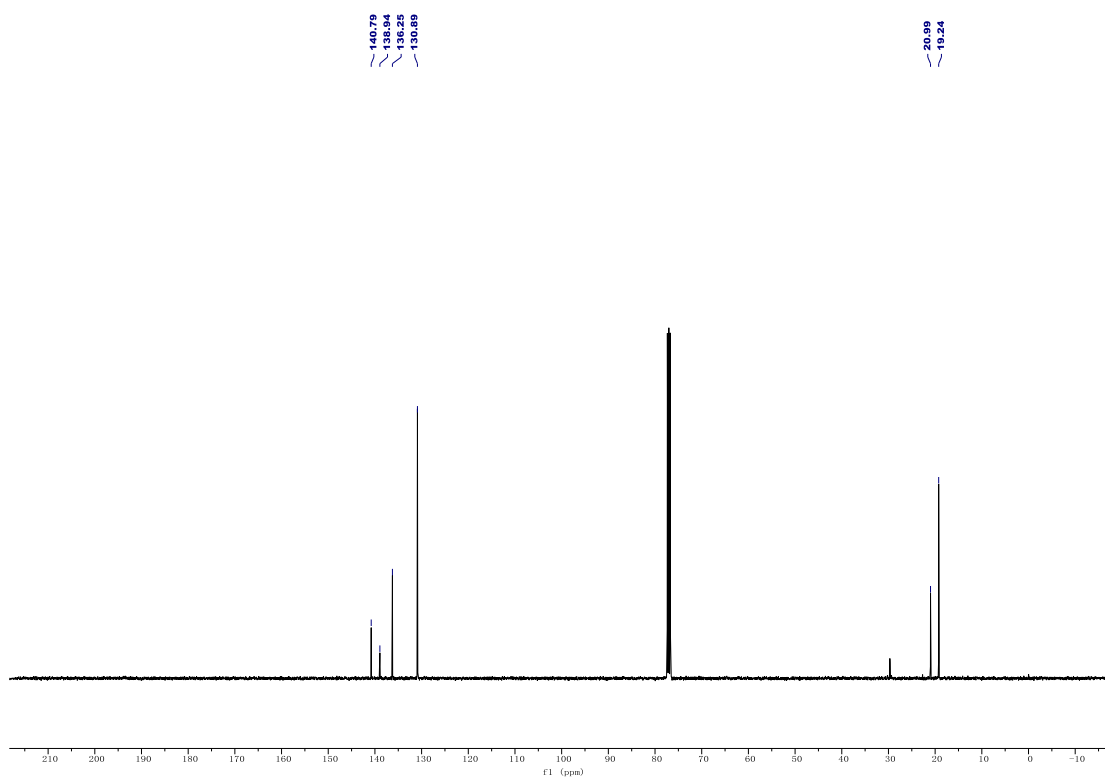

# (S)-Naphthalene-1-sulfonamide (4s):

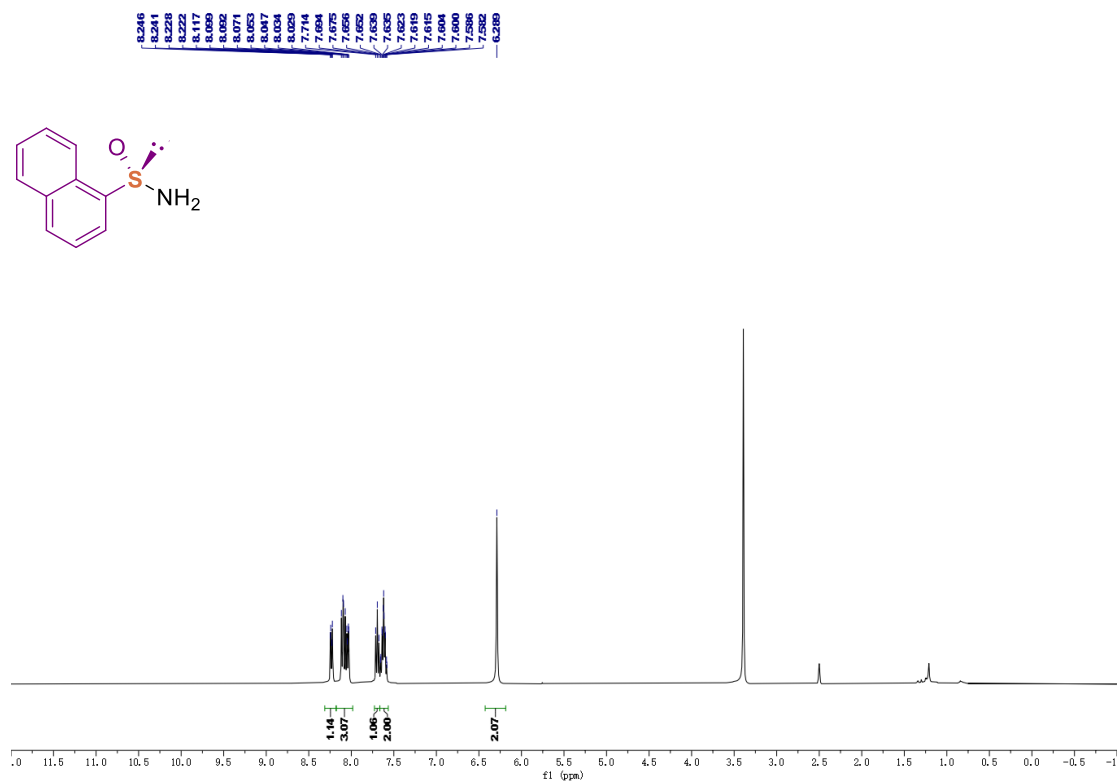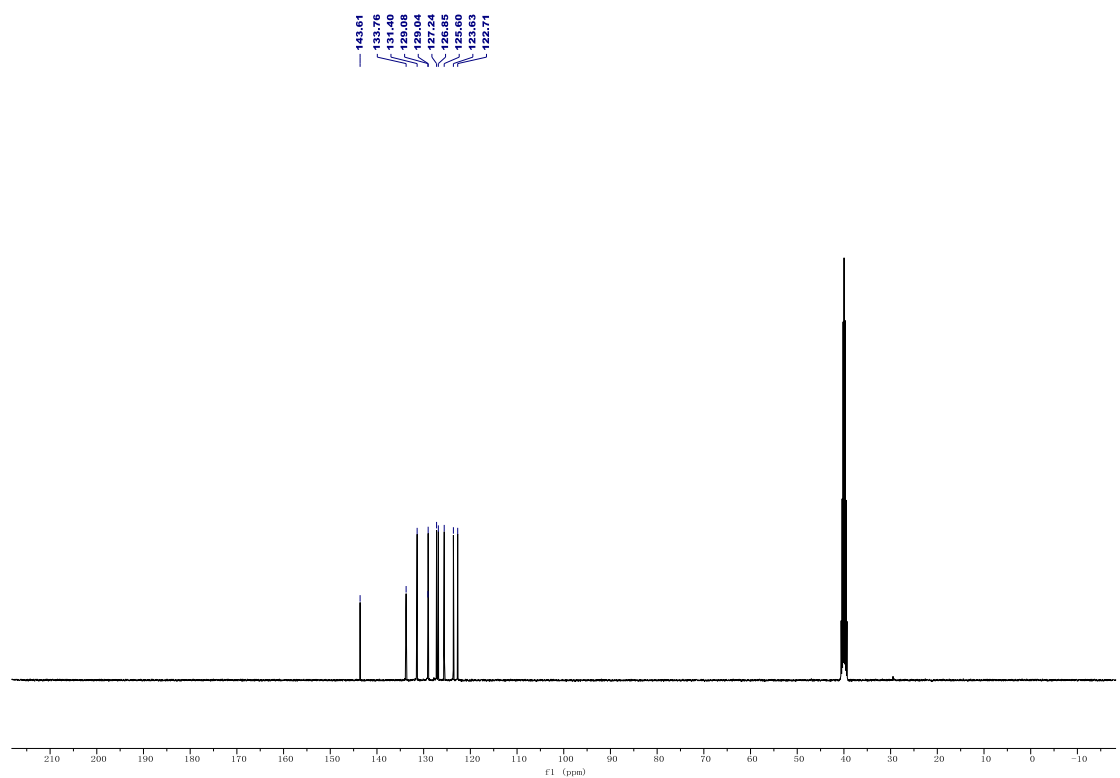

**(S)-Naphthalene-2-sulfinamide(4t):**

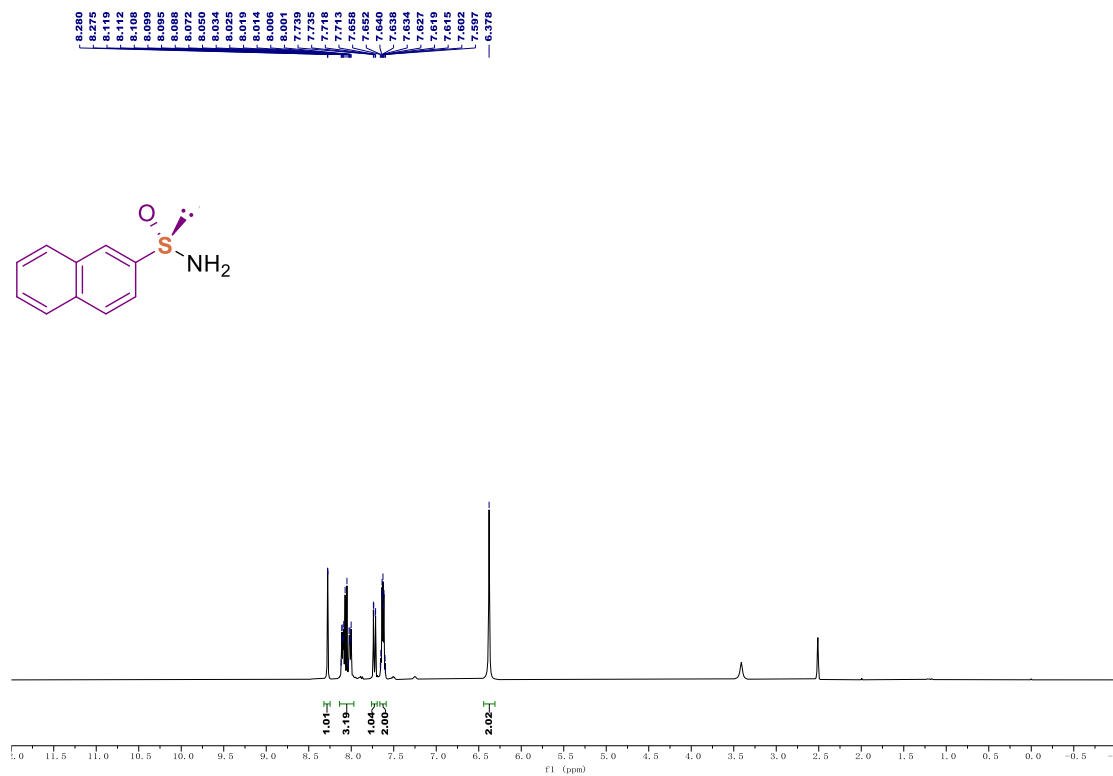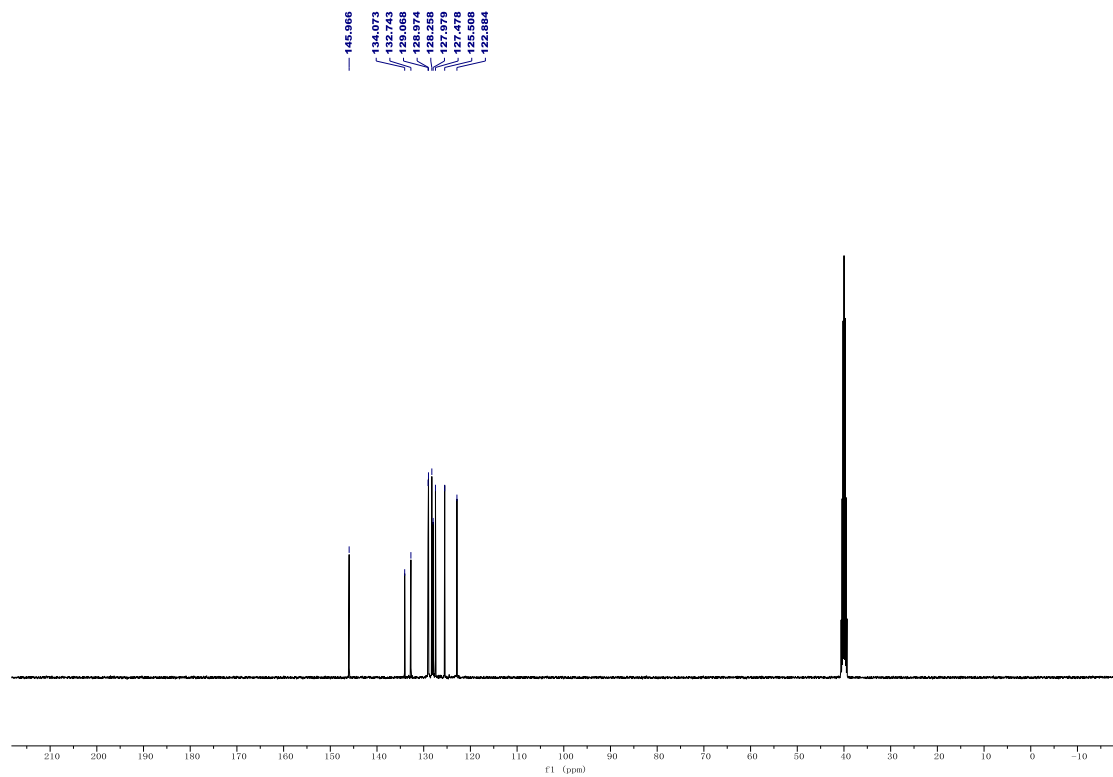

**(S)-2,3-Dihydrobenzofuran-5-sulfonamide (4u):**

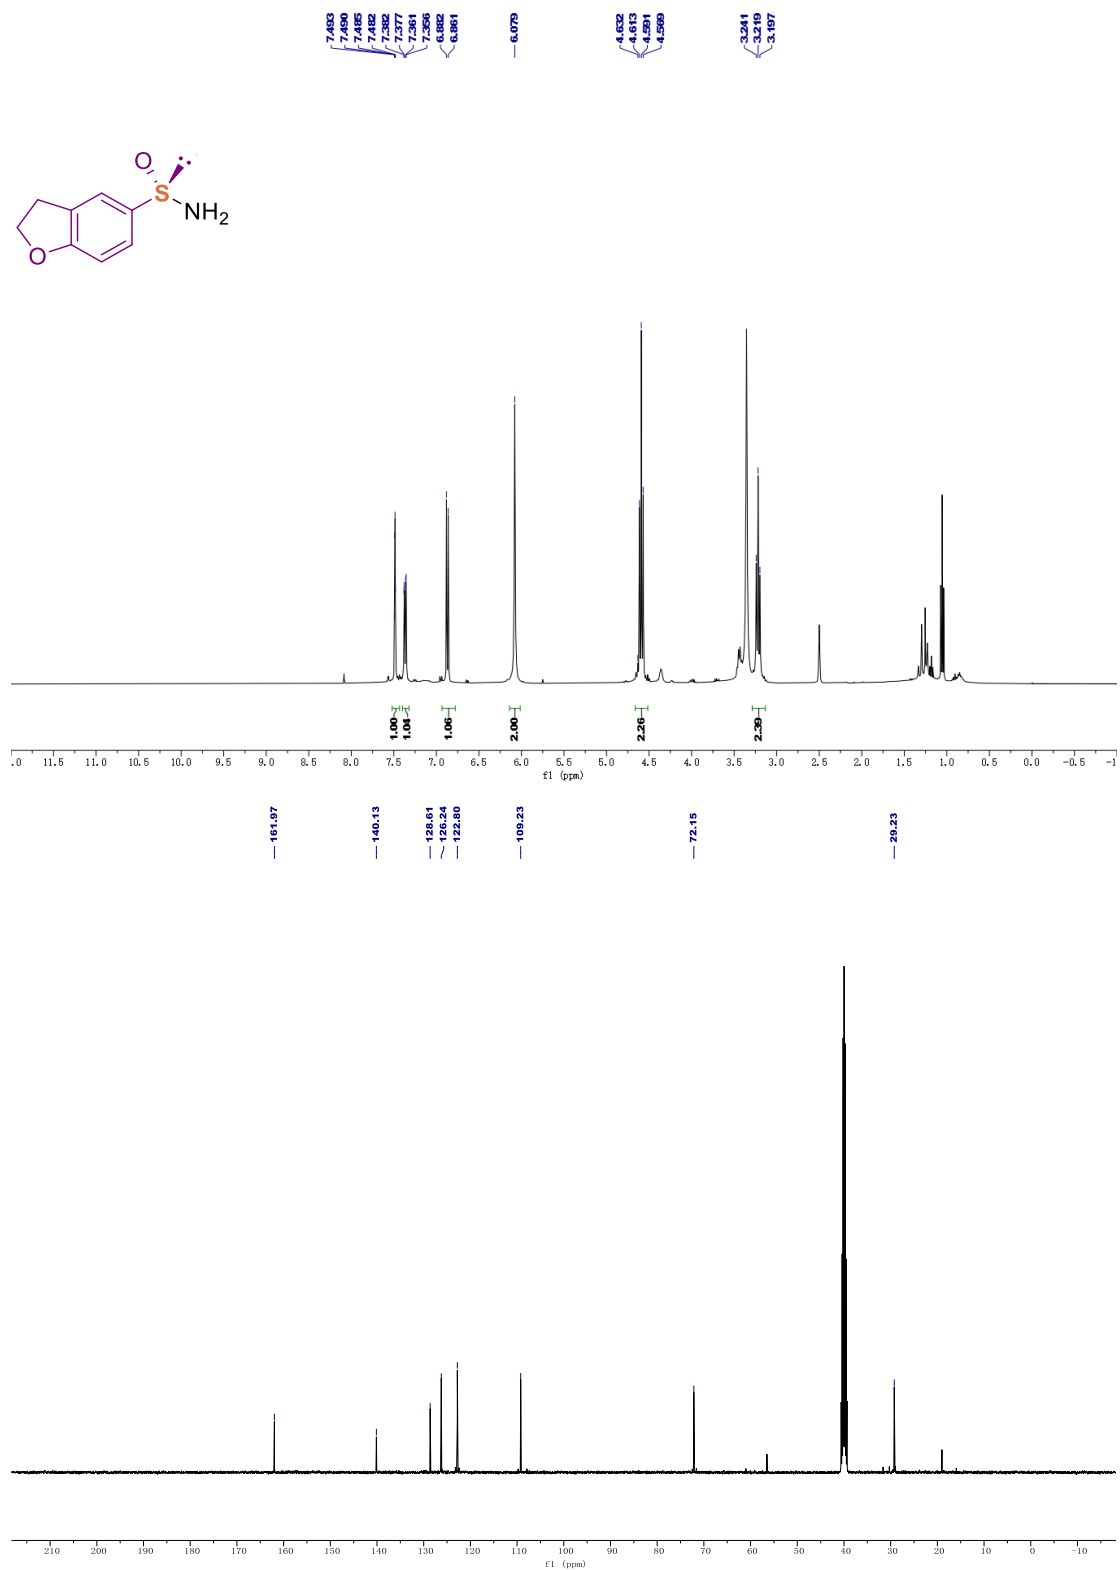

**(S)-2-Thienesulfonamide (4v):**

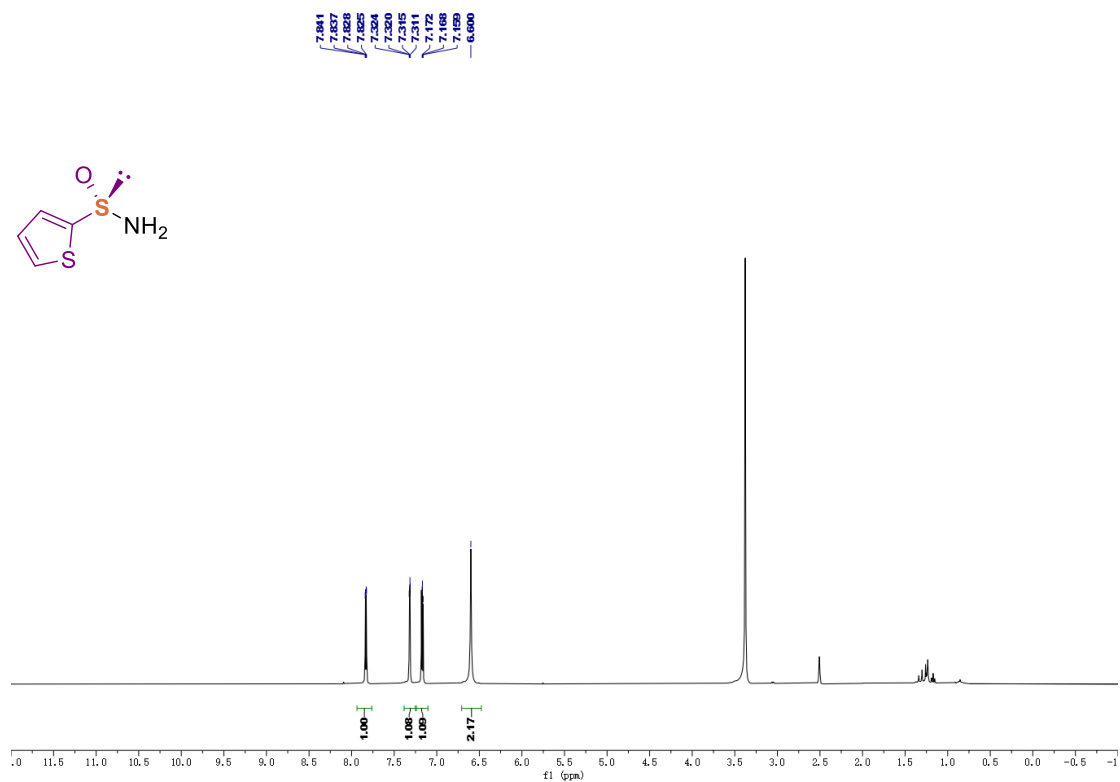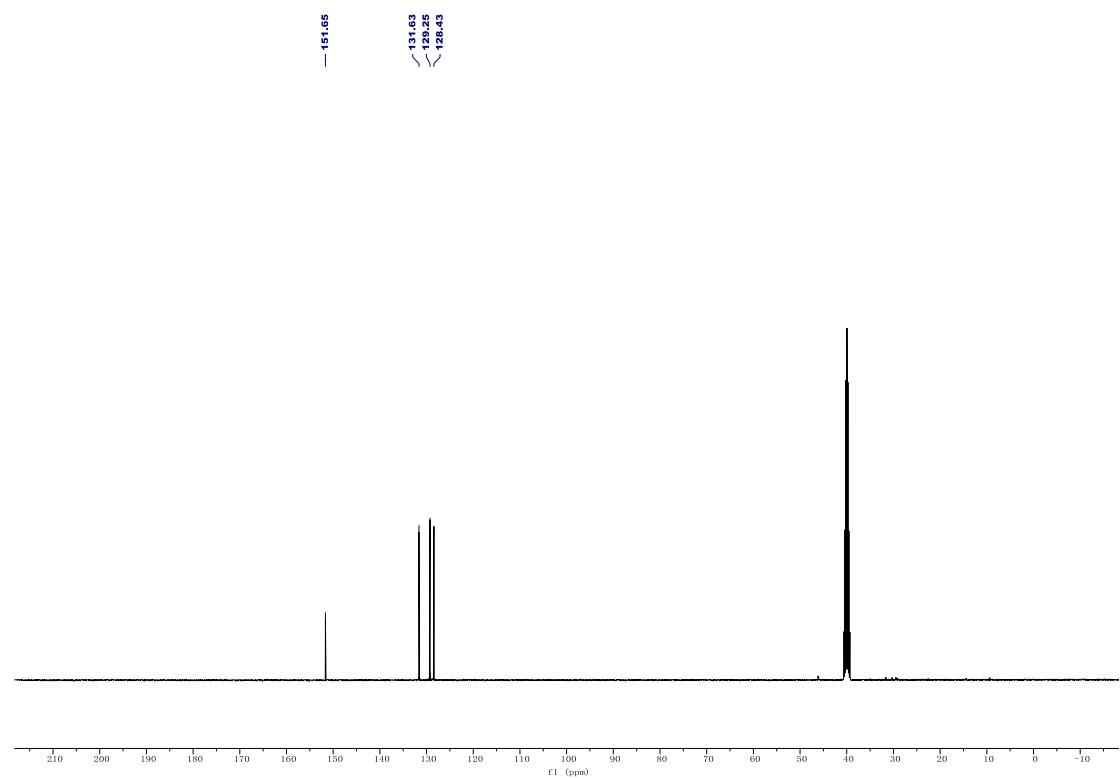

**(S)-5-Methylthiophene sulfonamide (4w):**

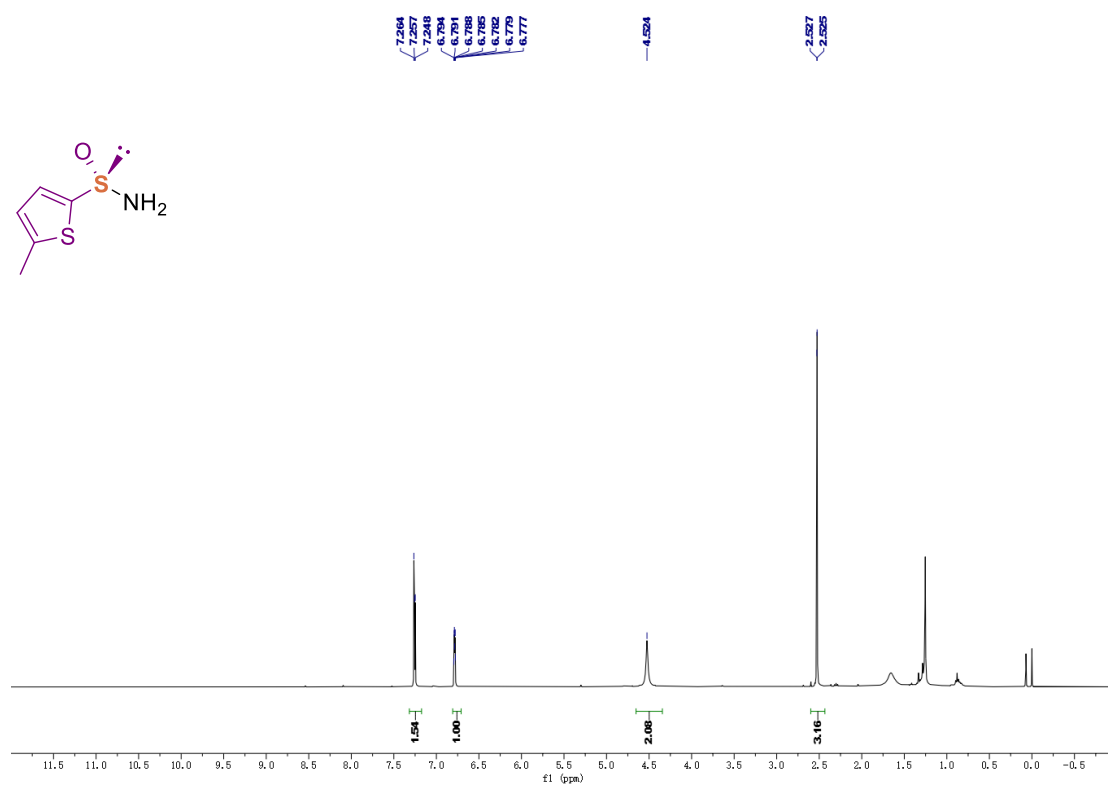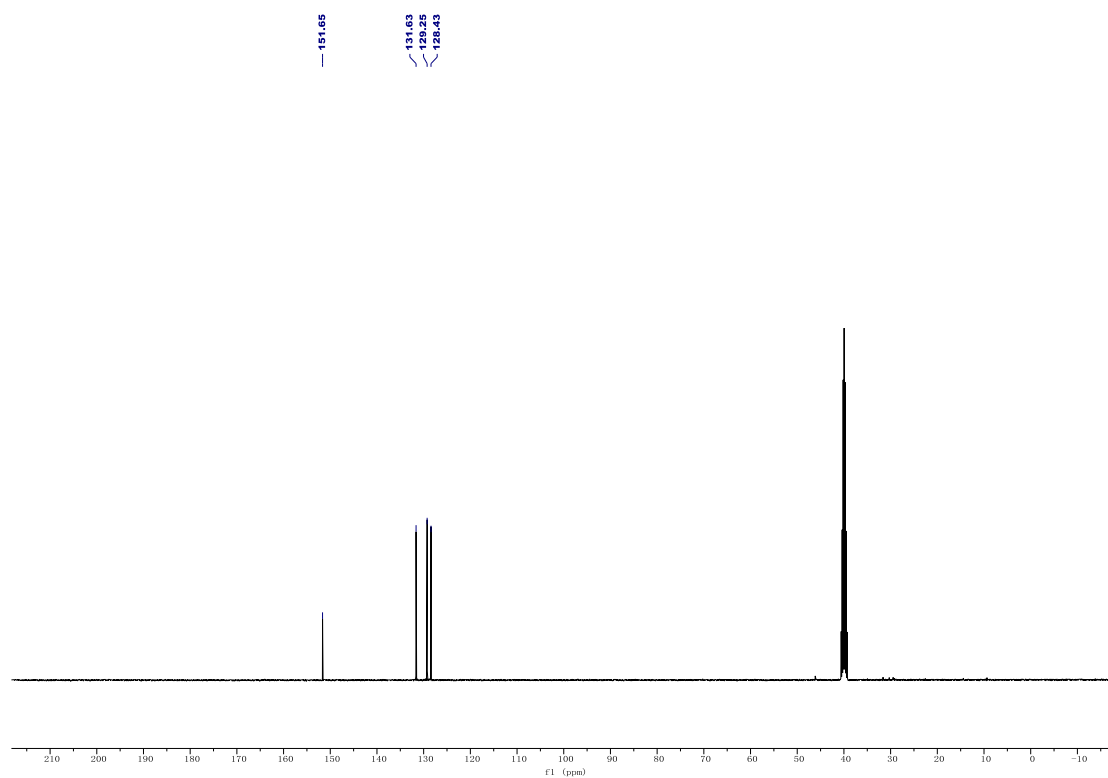



# (S)-Cyclohexylsulfonamide (4x):

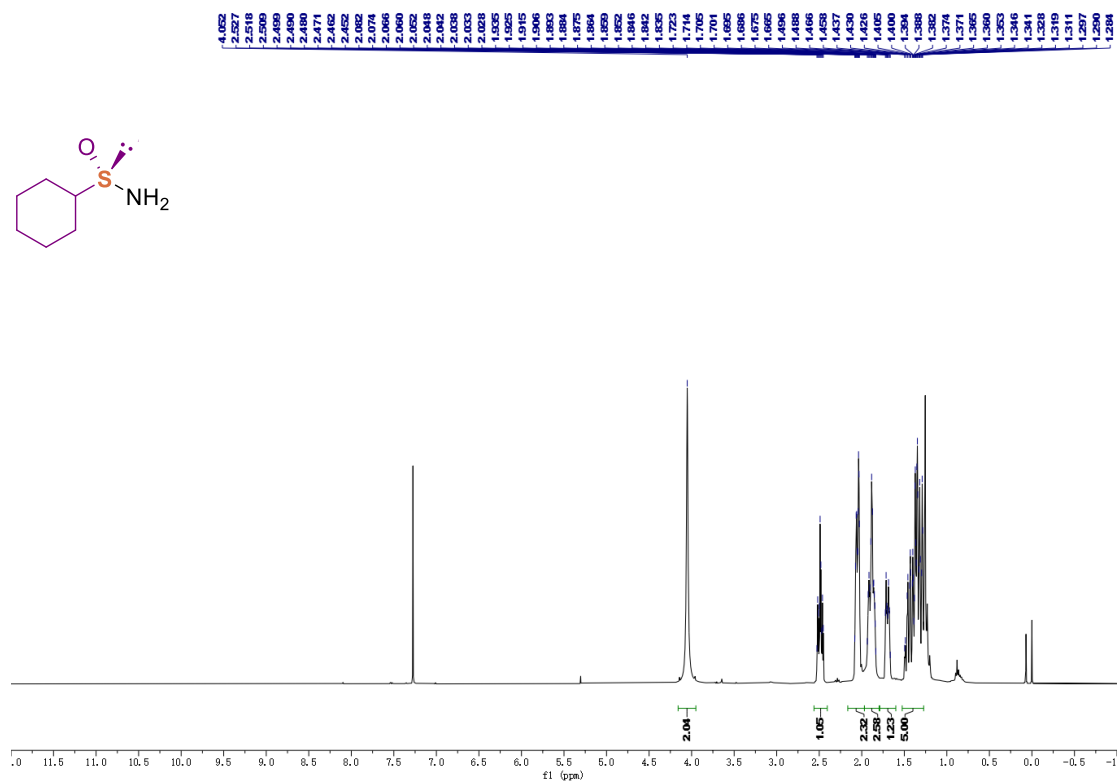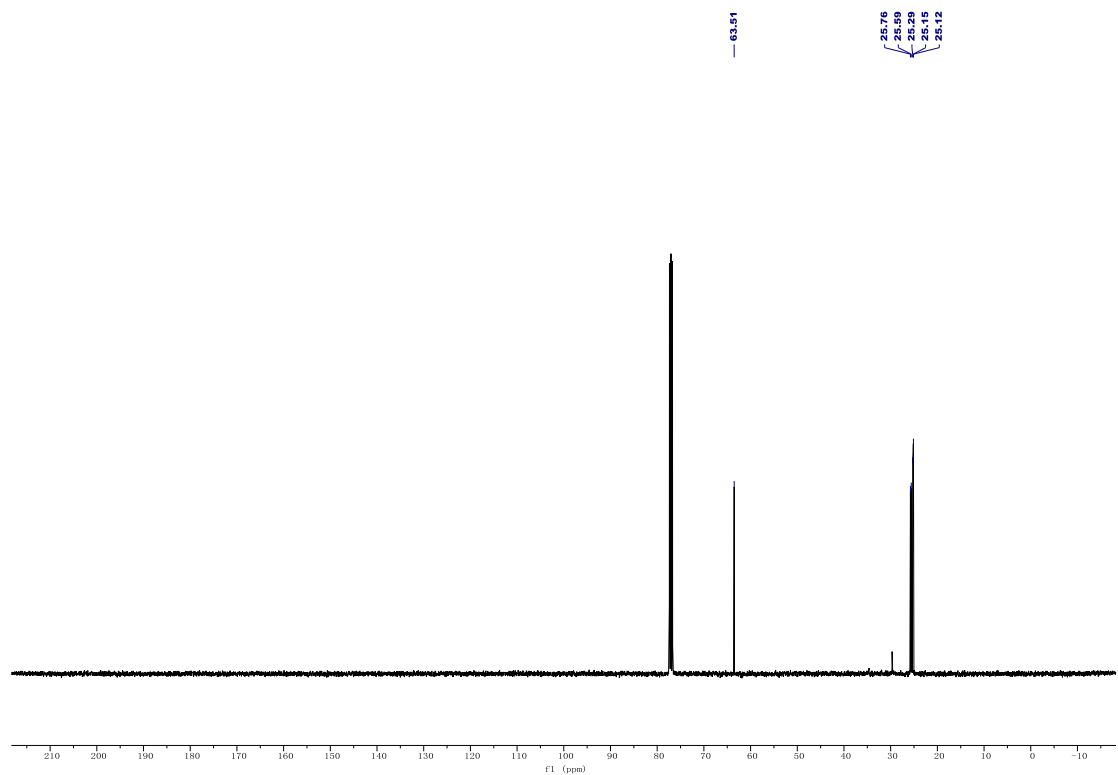

**(S)-2-Phenyl-ethanesulfonamide (4y):**

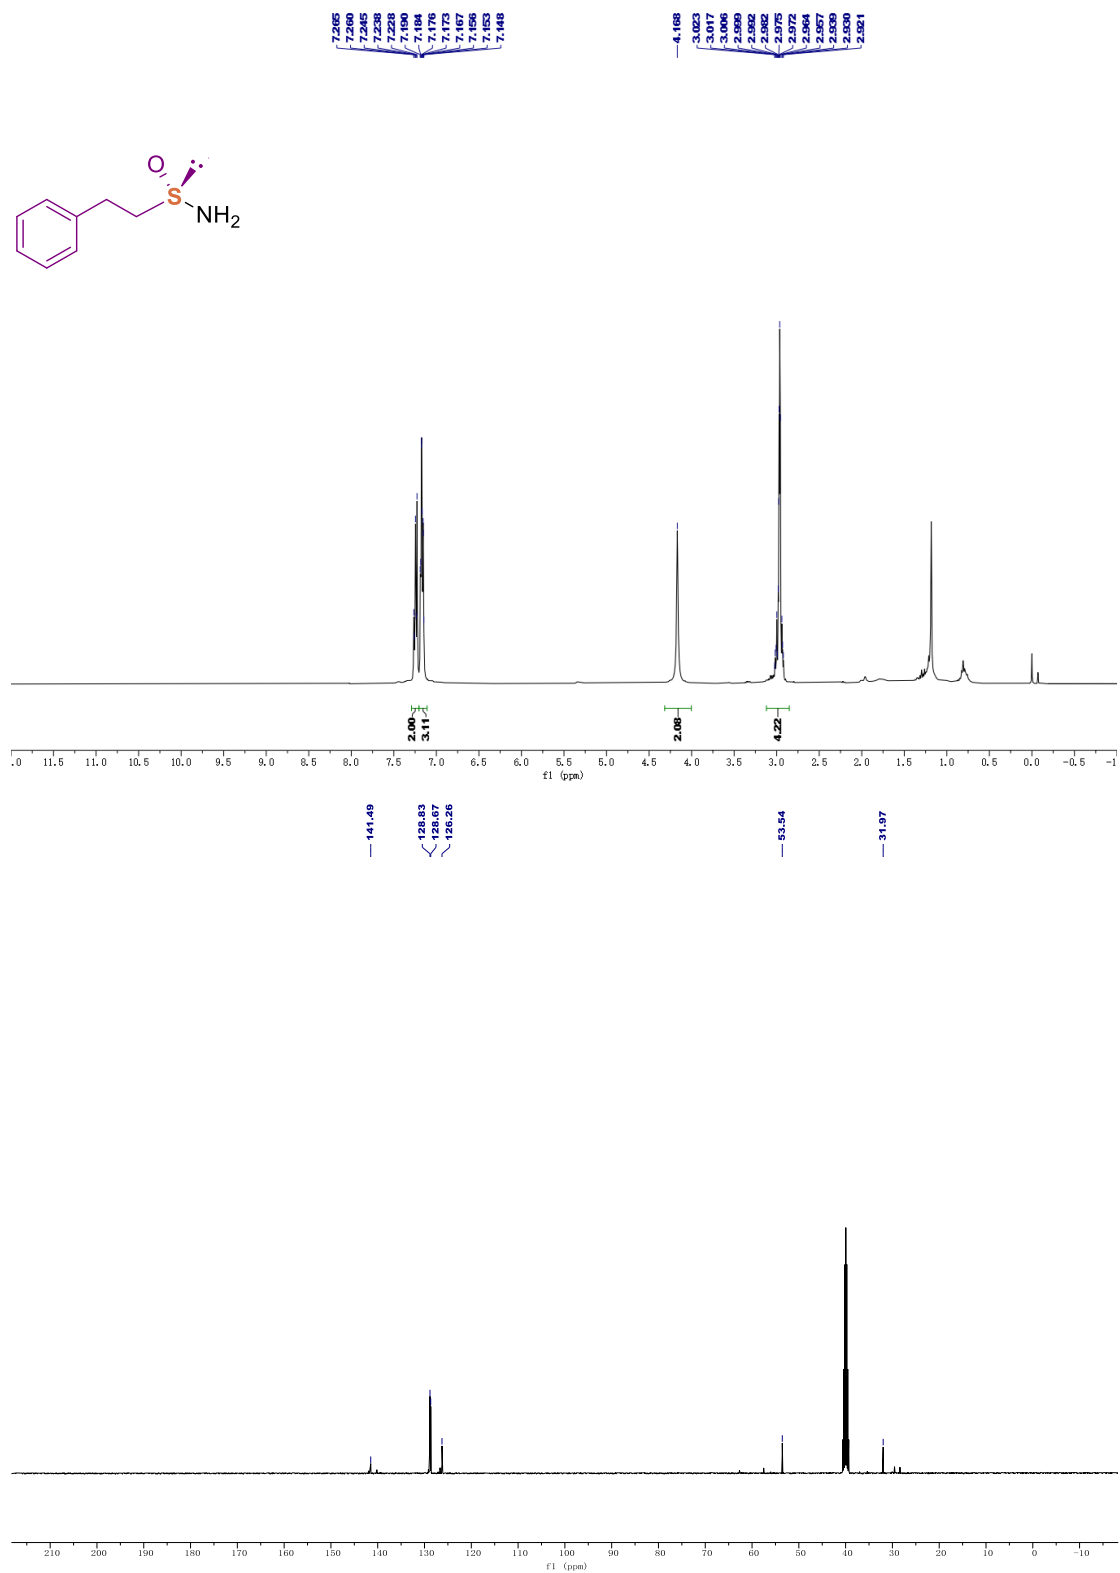

**(S)-4-(5-Methyl-3-phenylisoxazol-4-yl) benzenesulfonamide (5a):**

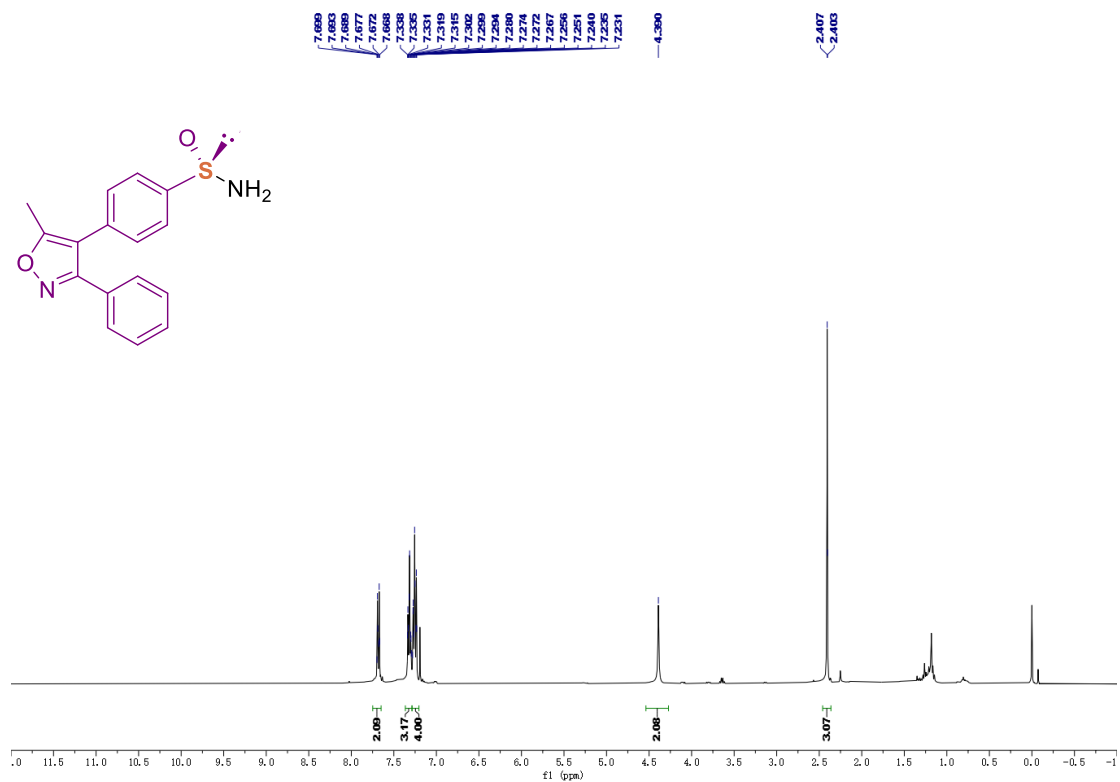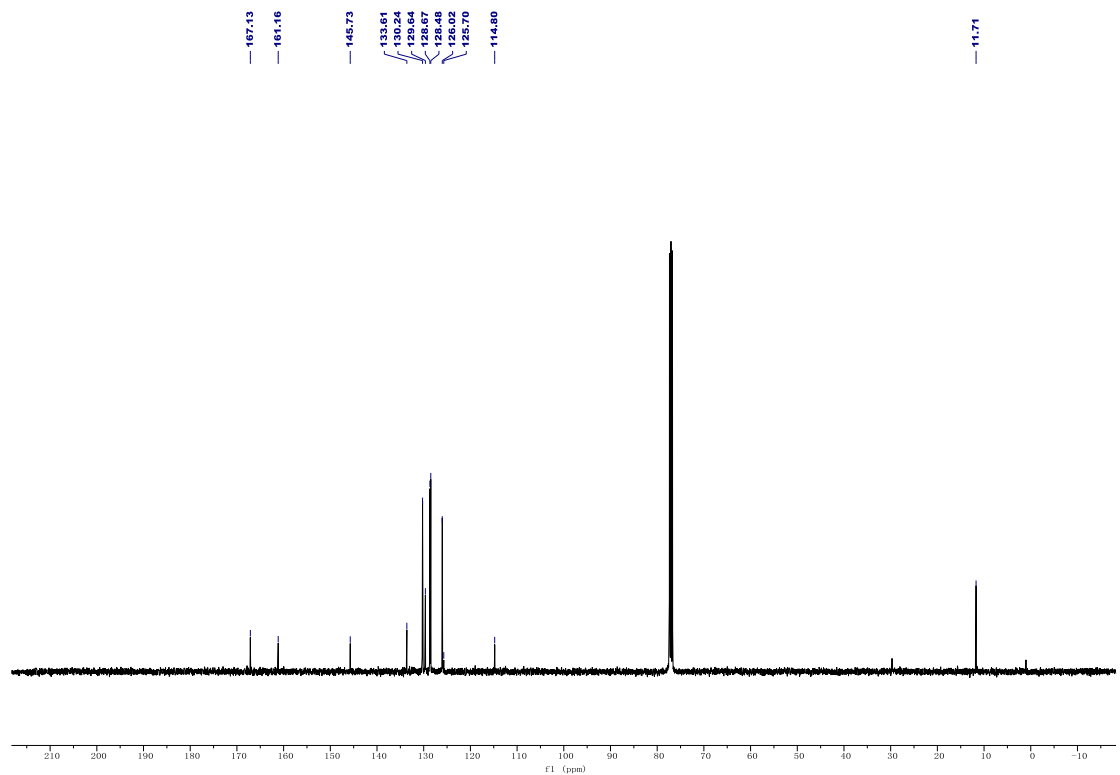

**(S)- 4-(5-(p-tolyl)-3-(trifluoromethyl)-1H-pyrazol-1-yl)benzenesulfonamide (5b):**

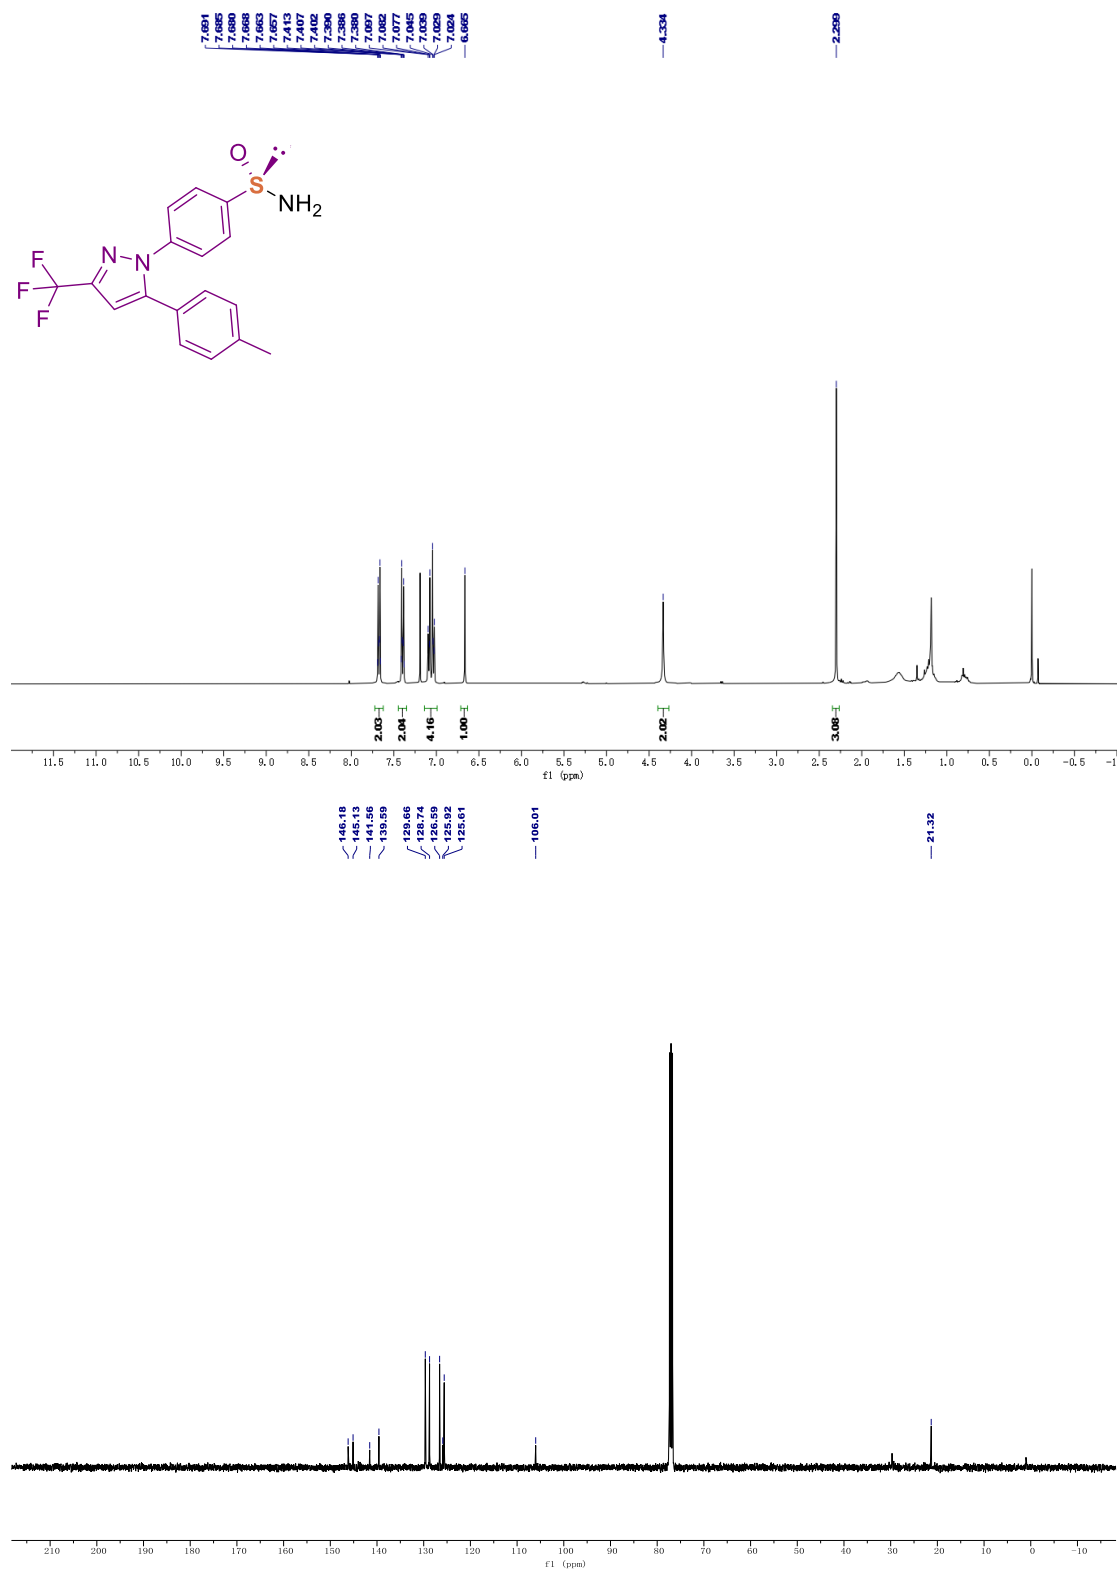

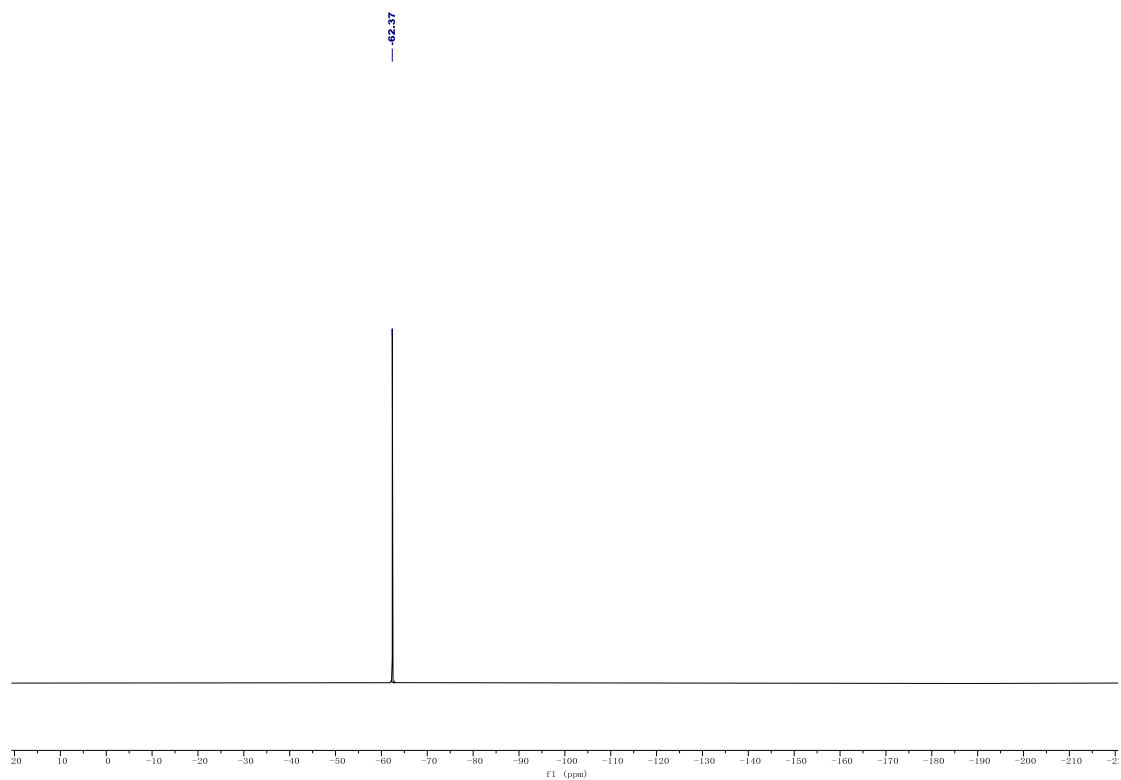

**(S)-4-(3-(Difluoromethyl)-5-(3-fluoro-4-methoxyphenyl)-1H-pyrazol-1-yl) phenyl (methylidyne) ( $\lambda^1$ -oxidaneyl)-  $\lambda^6$ -sulfanamine (5c):**

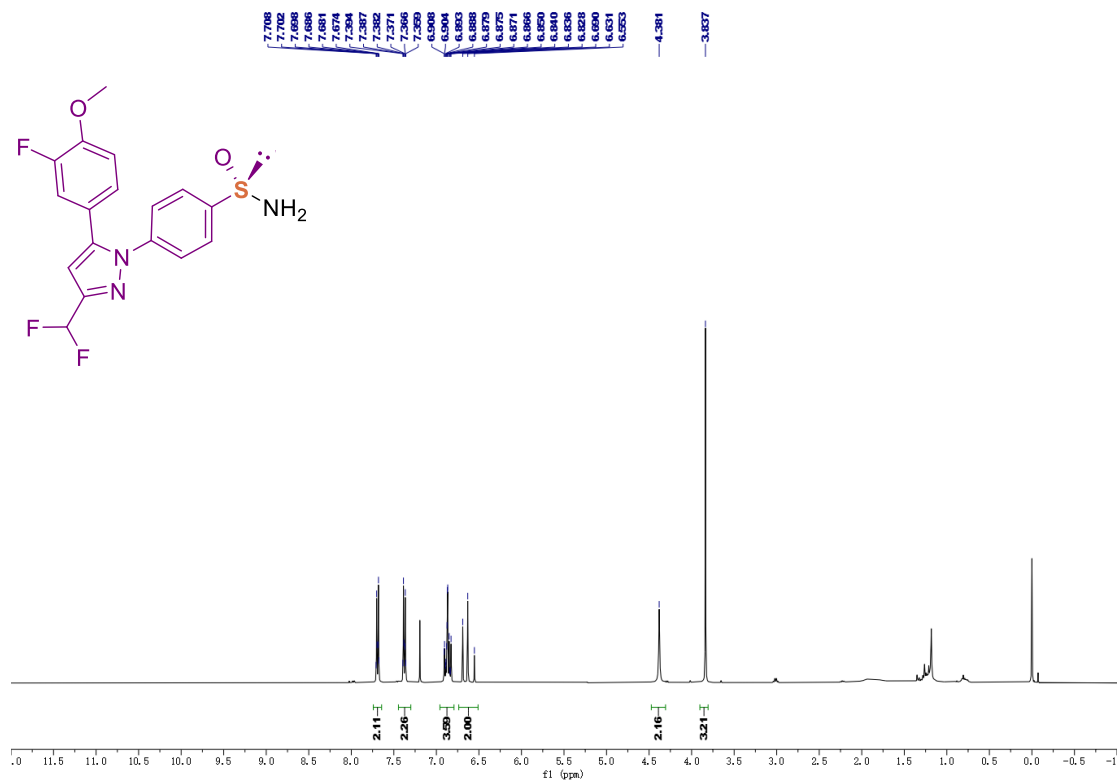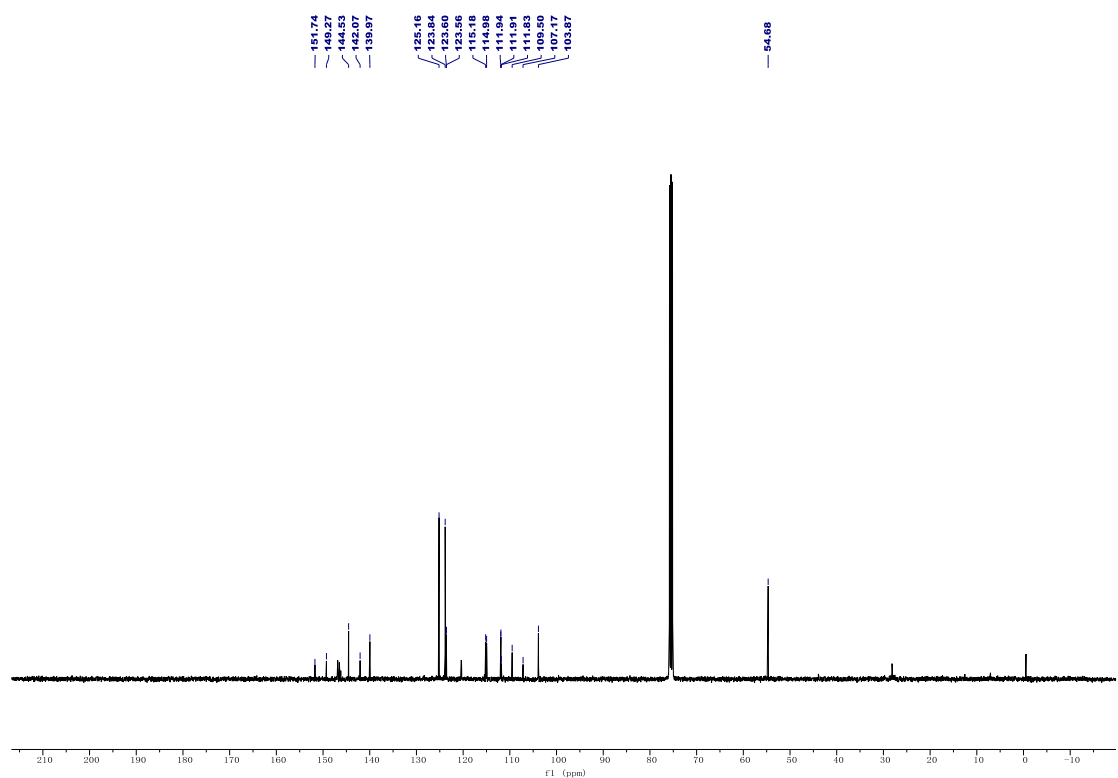



**(S)-N-Butyl-4-methyl benzenesulfonamide (6):**

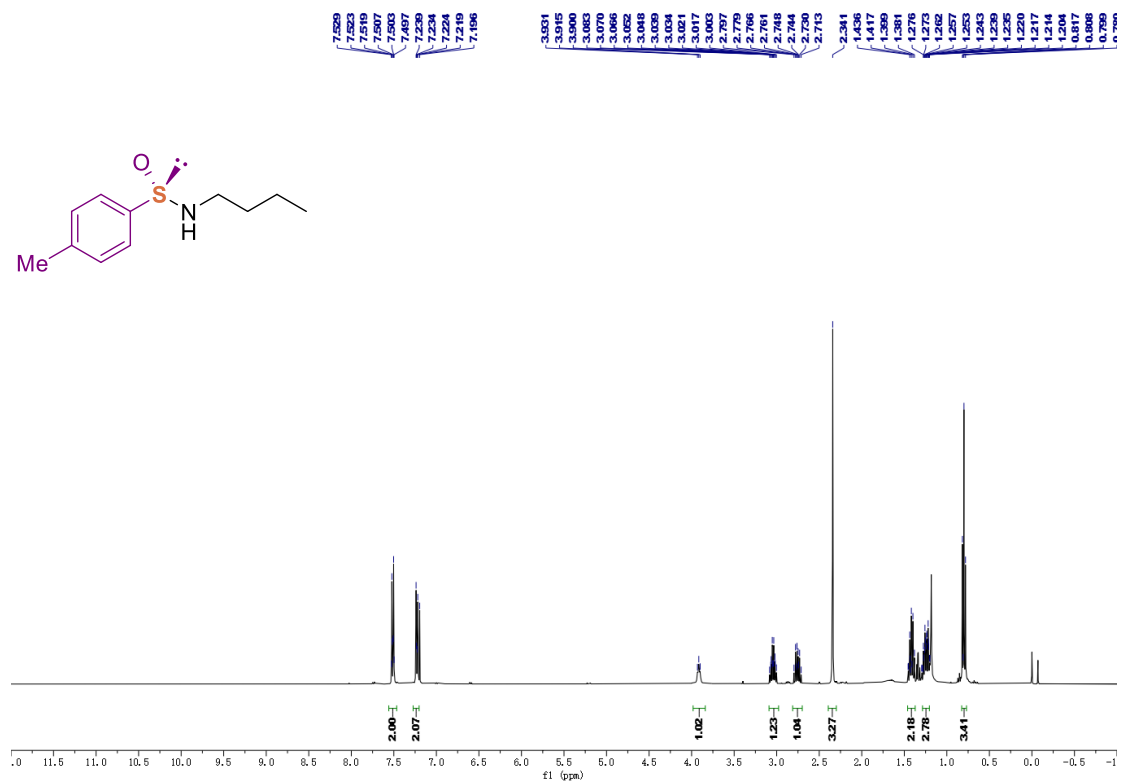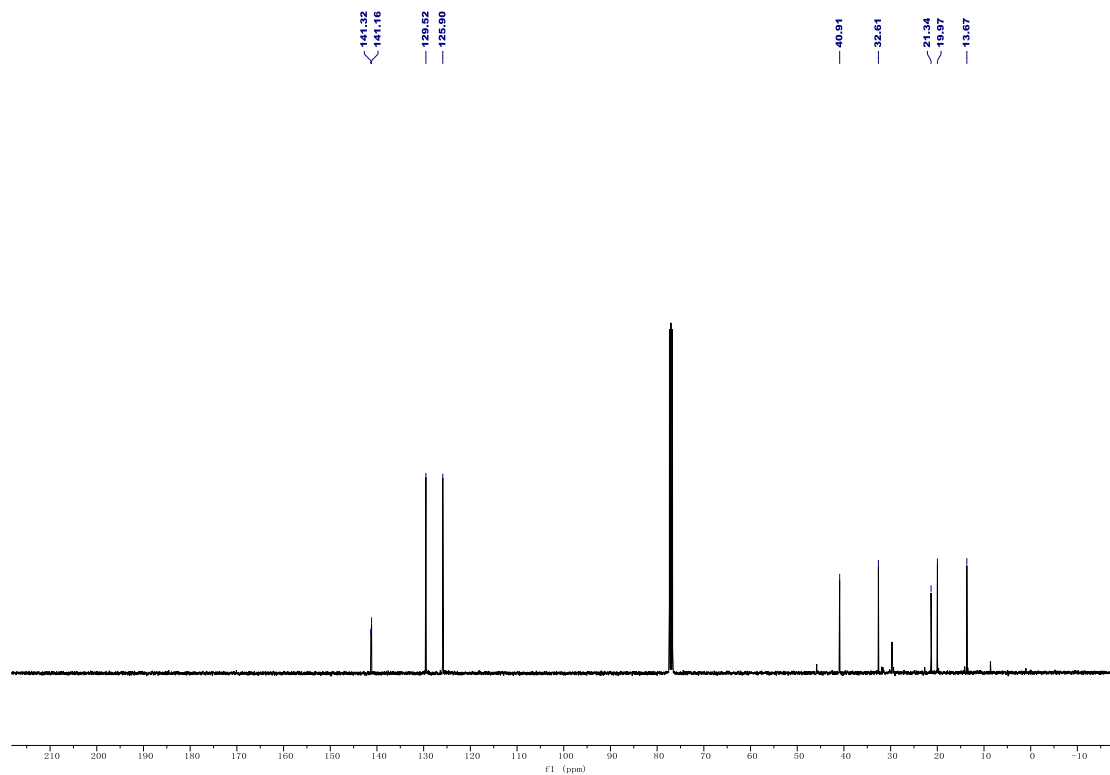



**(S)-N-Cyclopentyl-4-methylbenzenesulfonamide (7):**

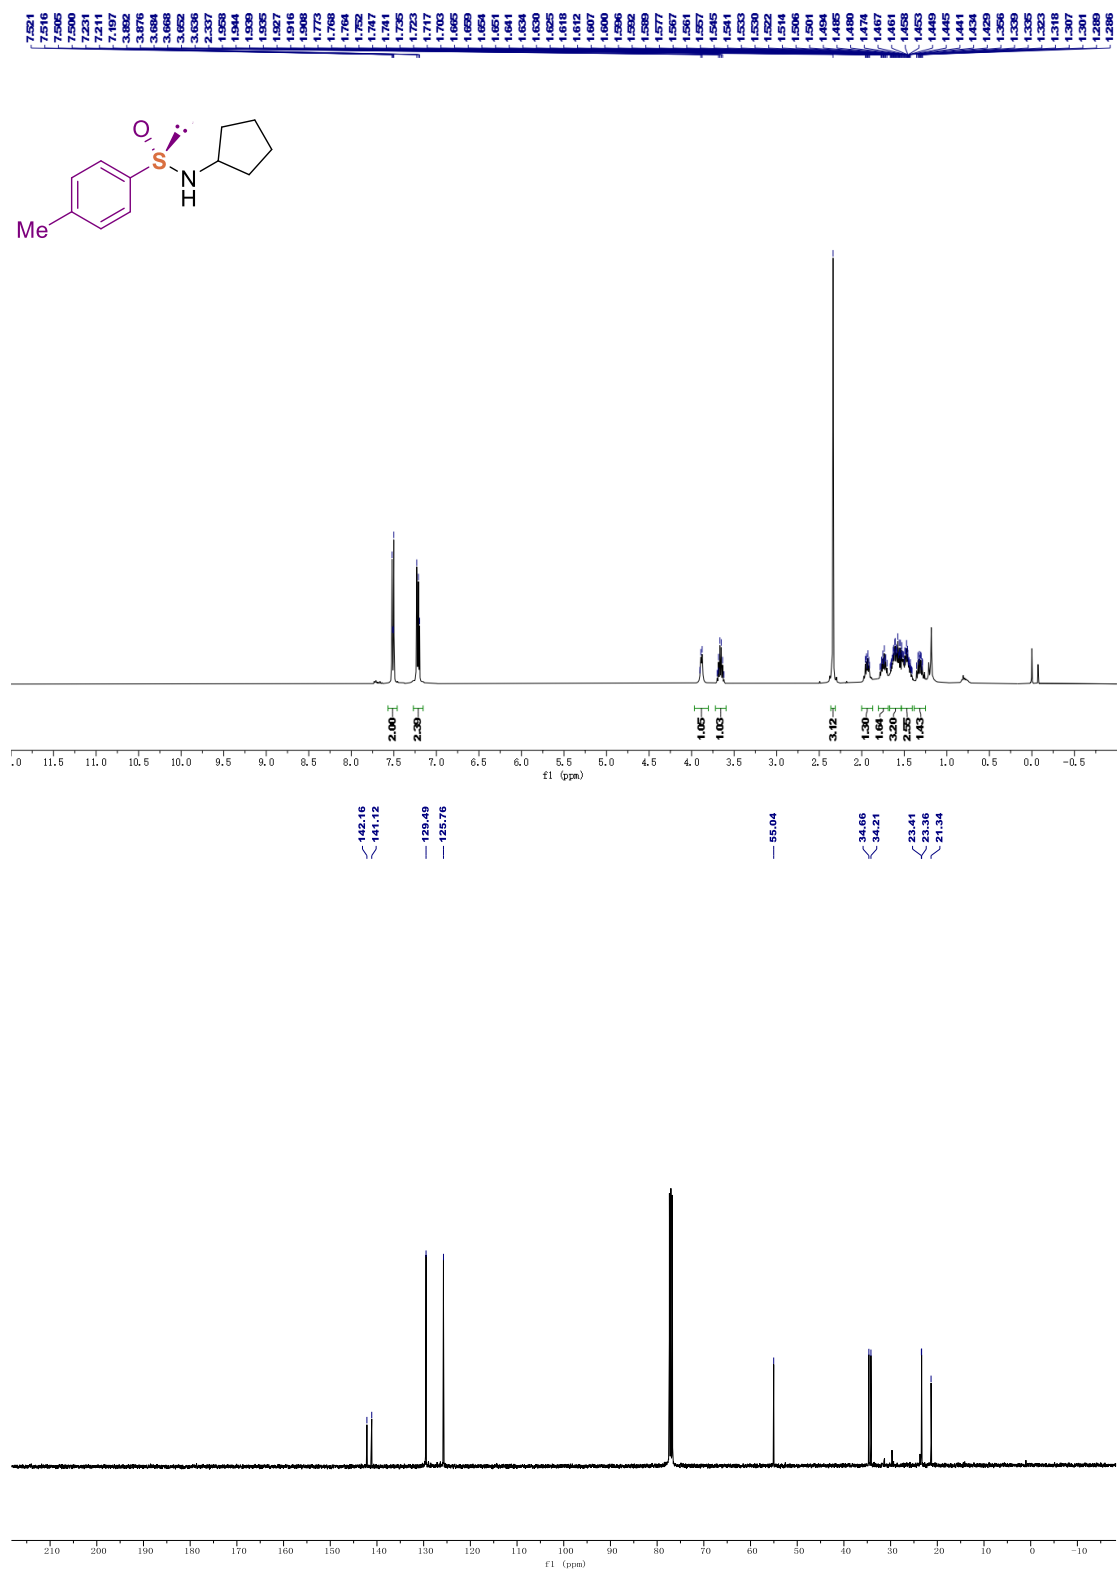

**(S)-N-(3,7-Dimethyloct-6-en-1-yl)-4-methylbenzenesulfonamide (8):**

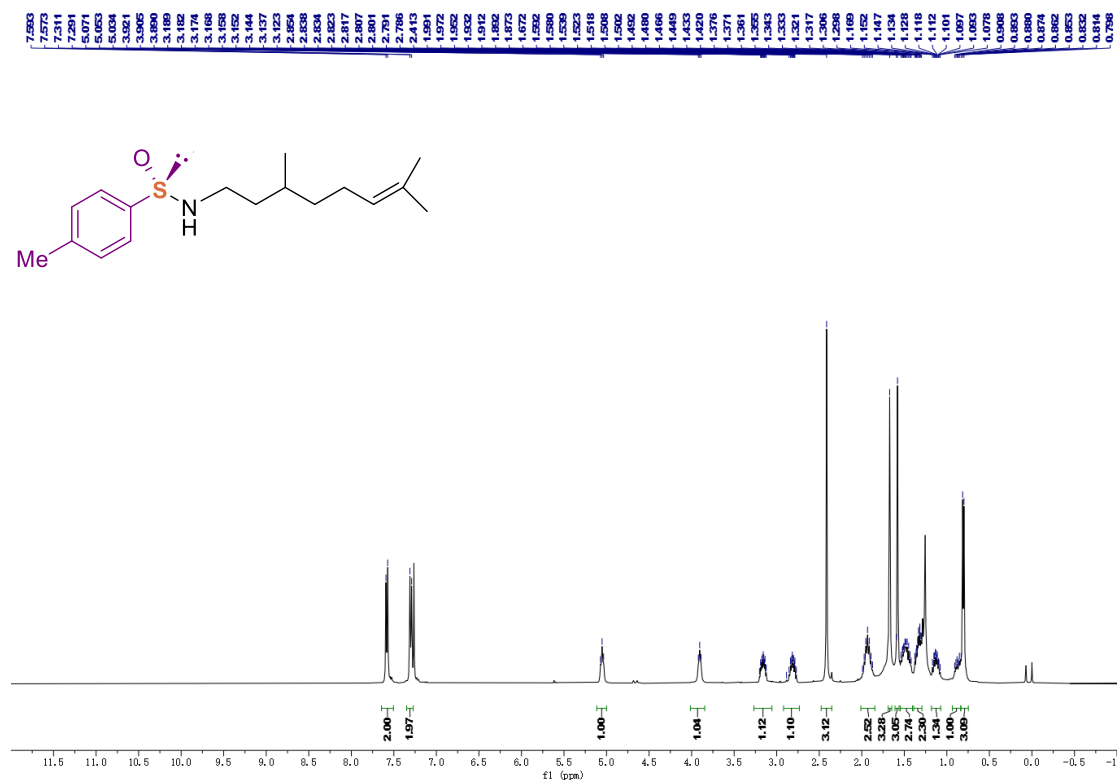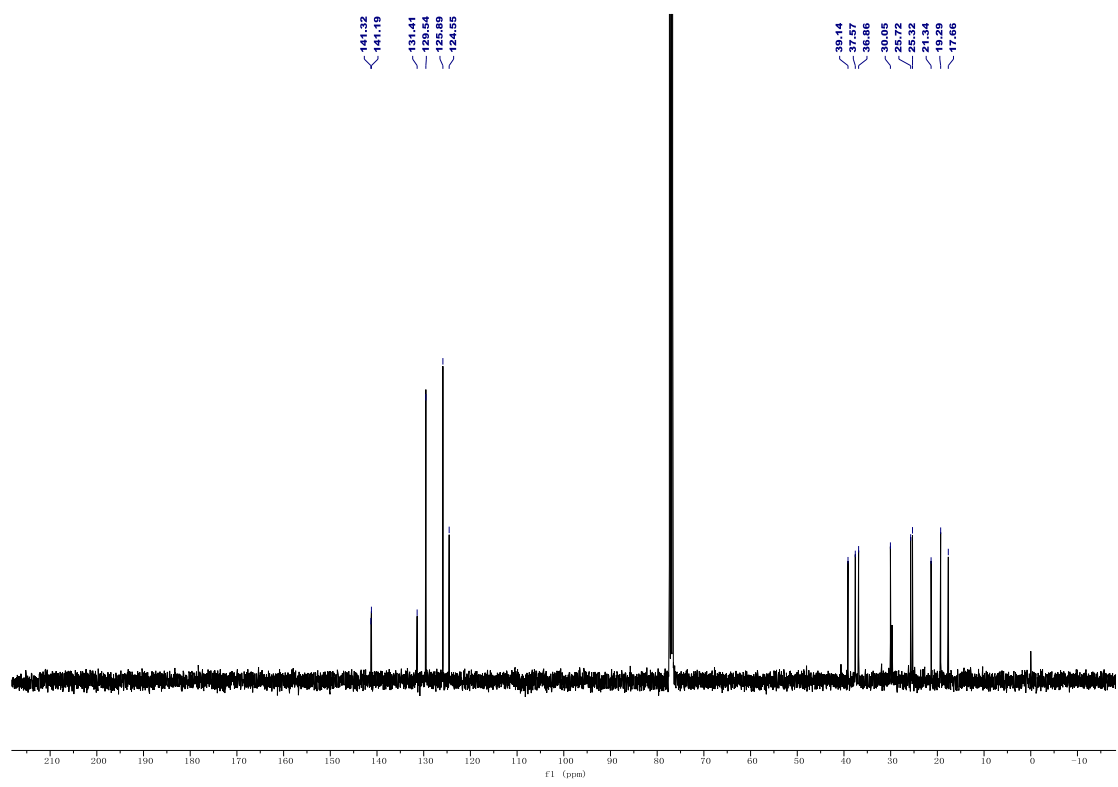

**(S)-4-Methyl-N-phenylbenzenesulfonamide (9):**

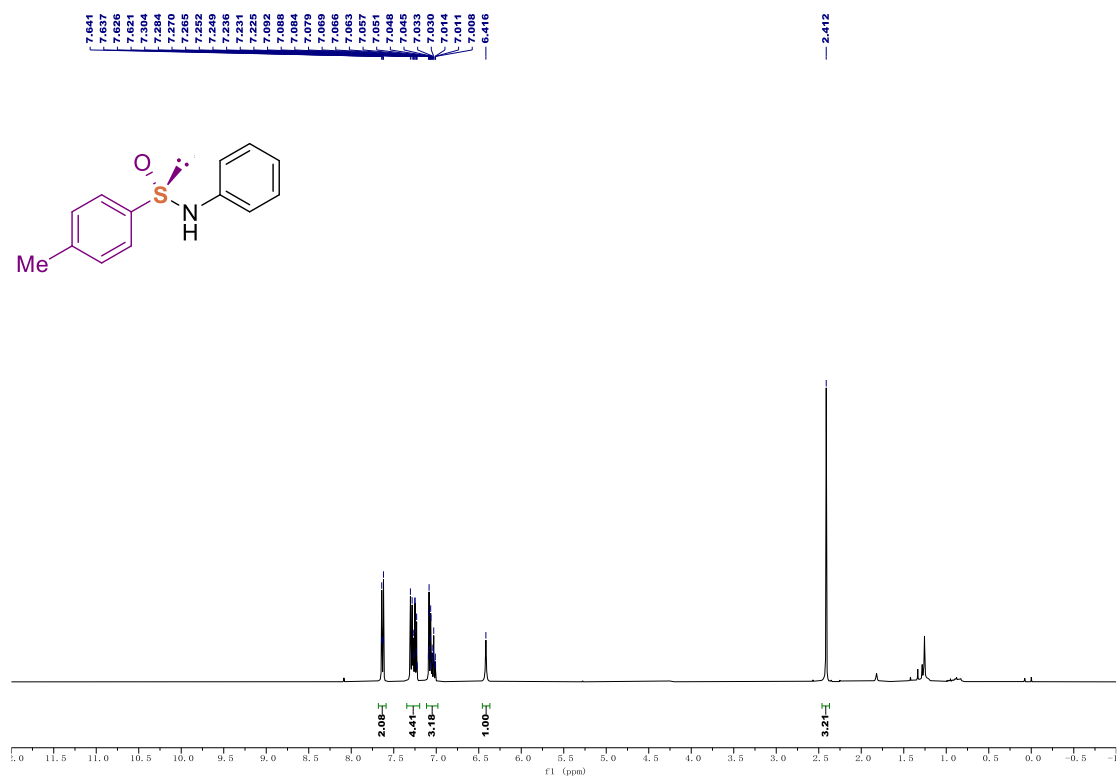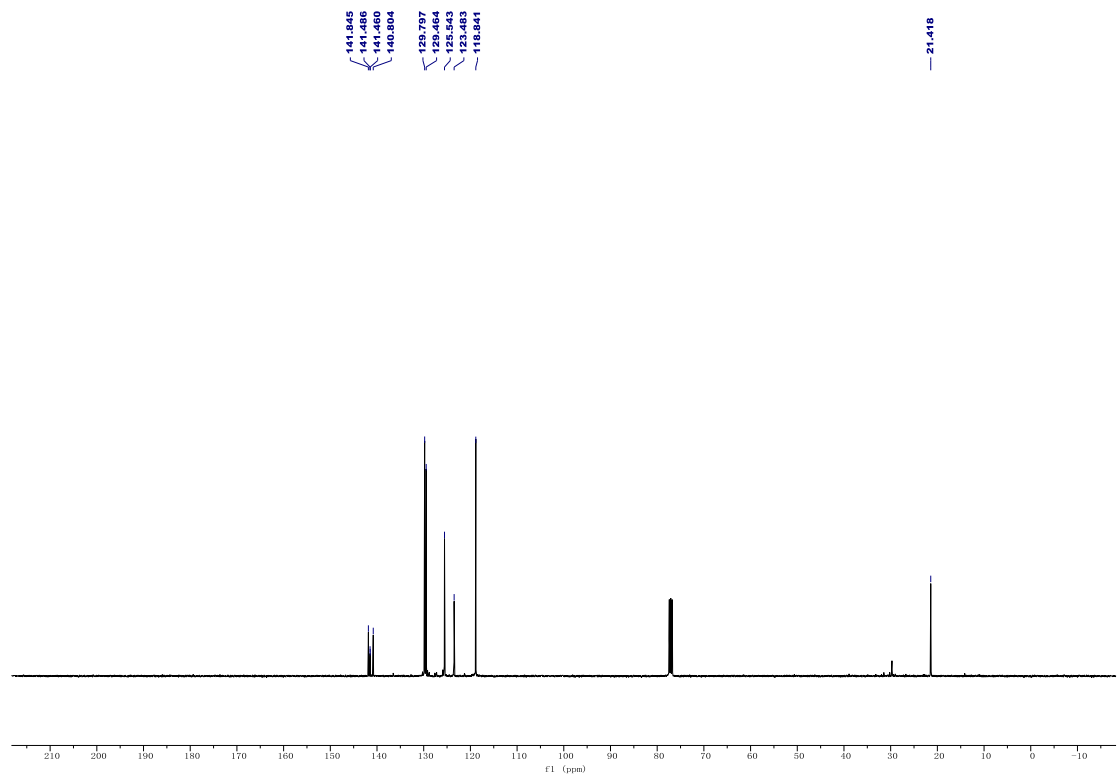

**(S)-N-(p-Tolylsulfinyl) methacrylamide (10):**

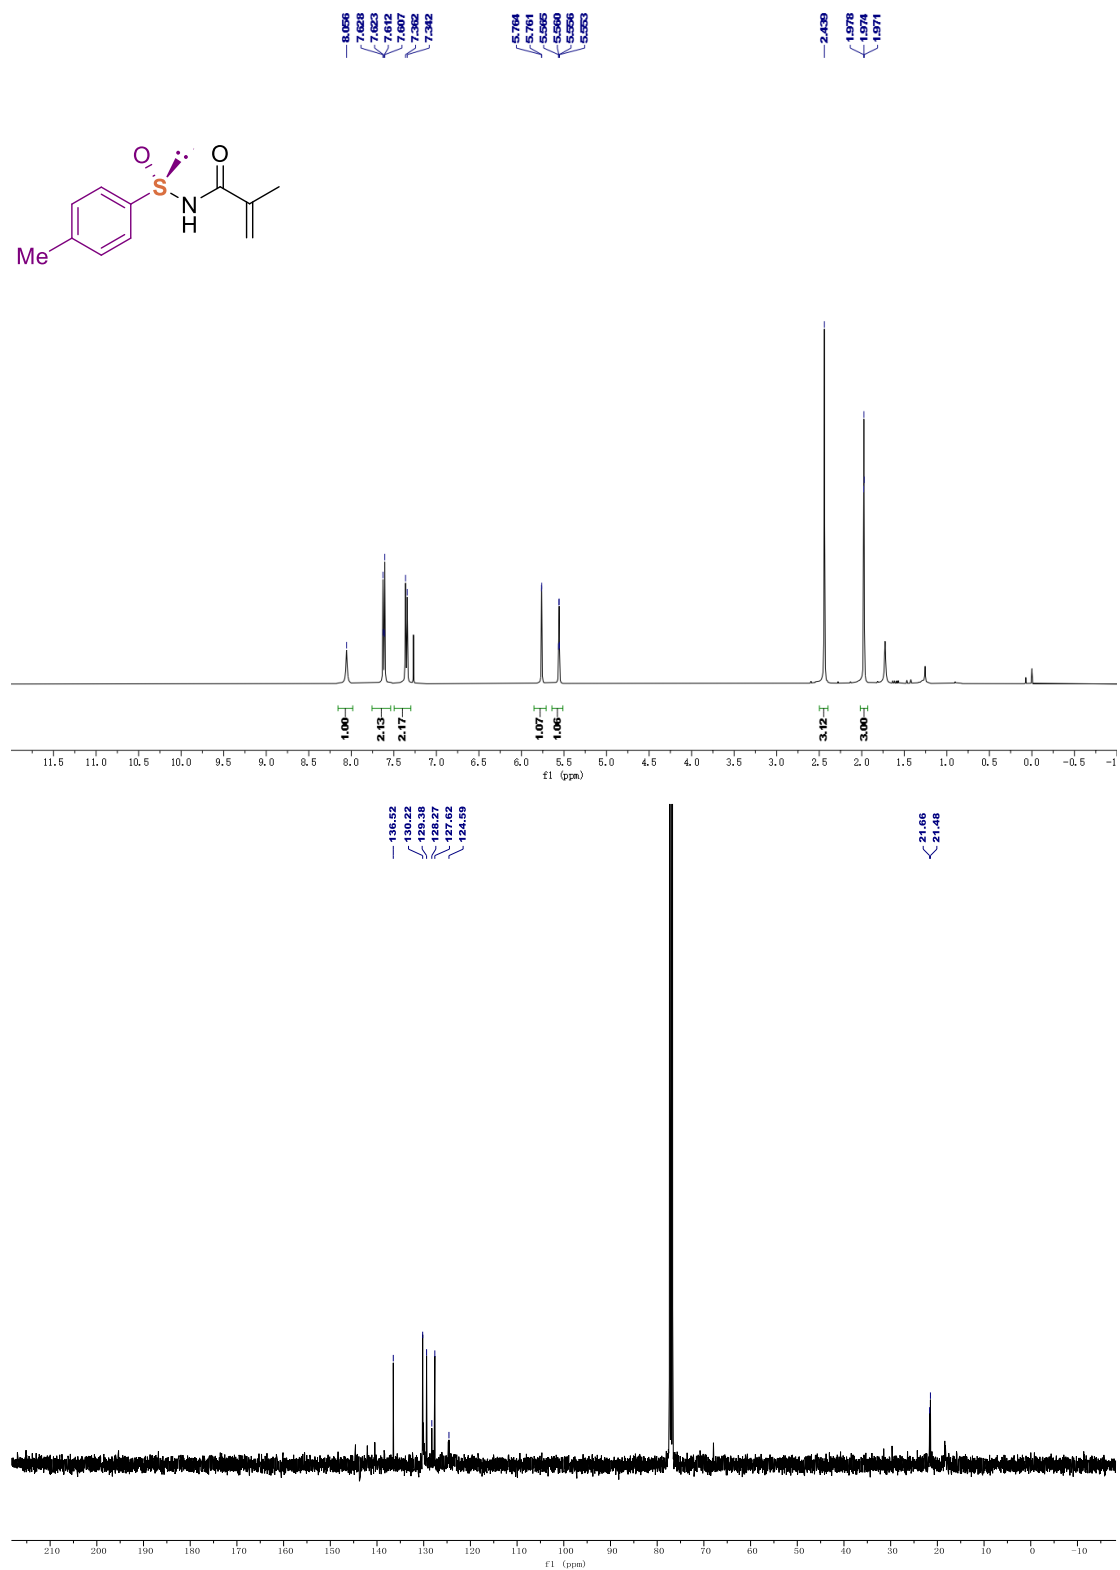

**(R)-N-[(S)-2,2-Dimethyl-1-phenylpropionate methyl ester]-4-methylbenzenesulfonamide (11):**

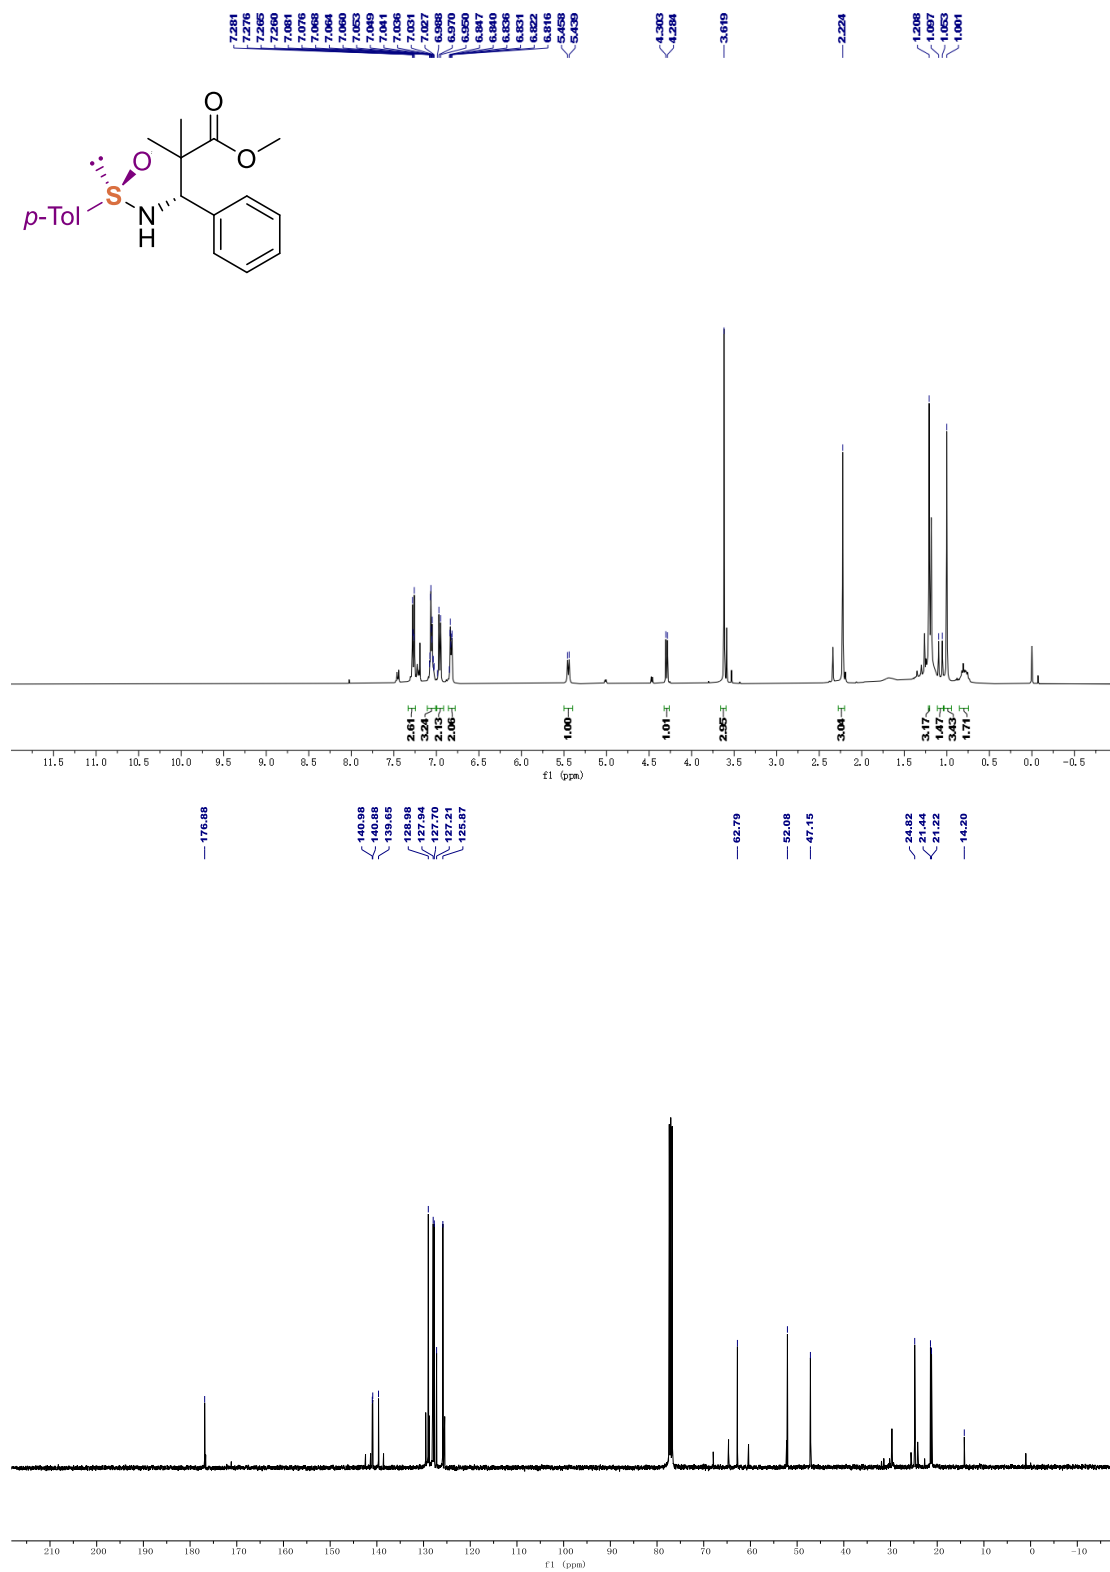

**(S)-N-(2-(Diphenylphosphanyl) benzyl)-4-methylbenzenesulfonamide (12):**

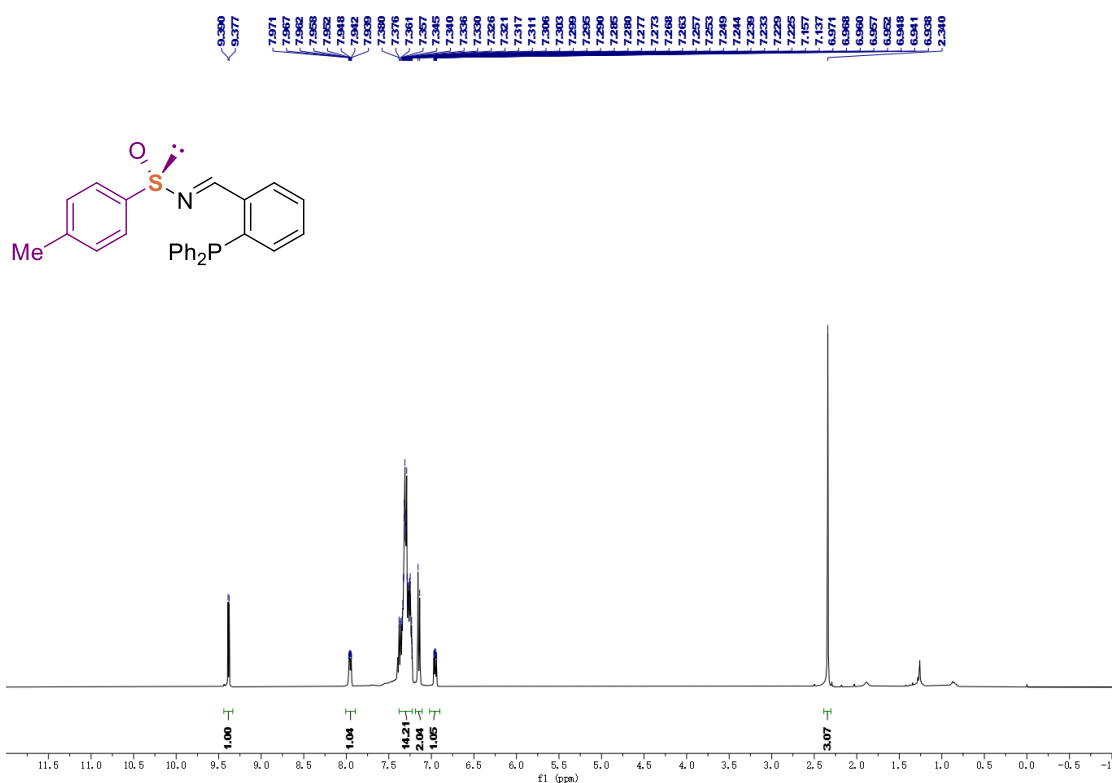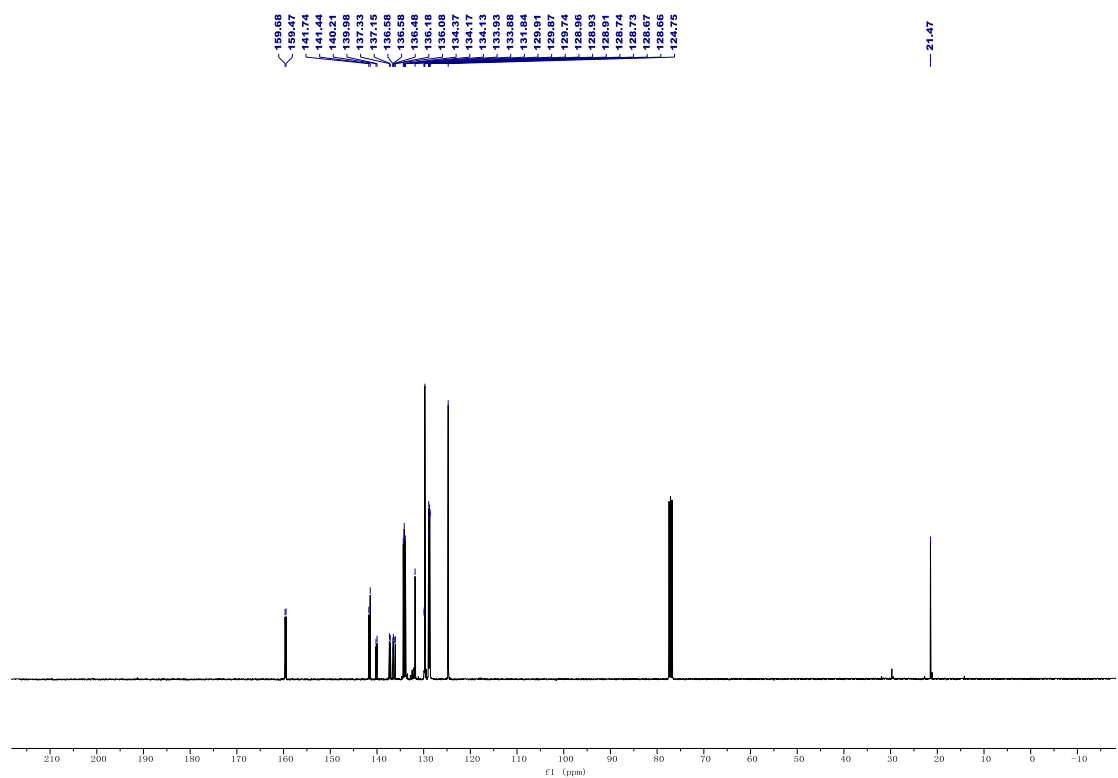

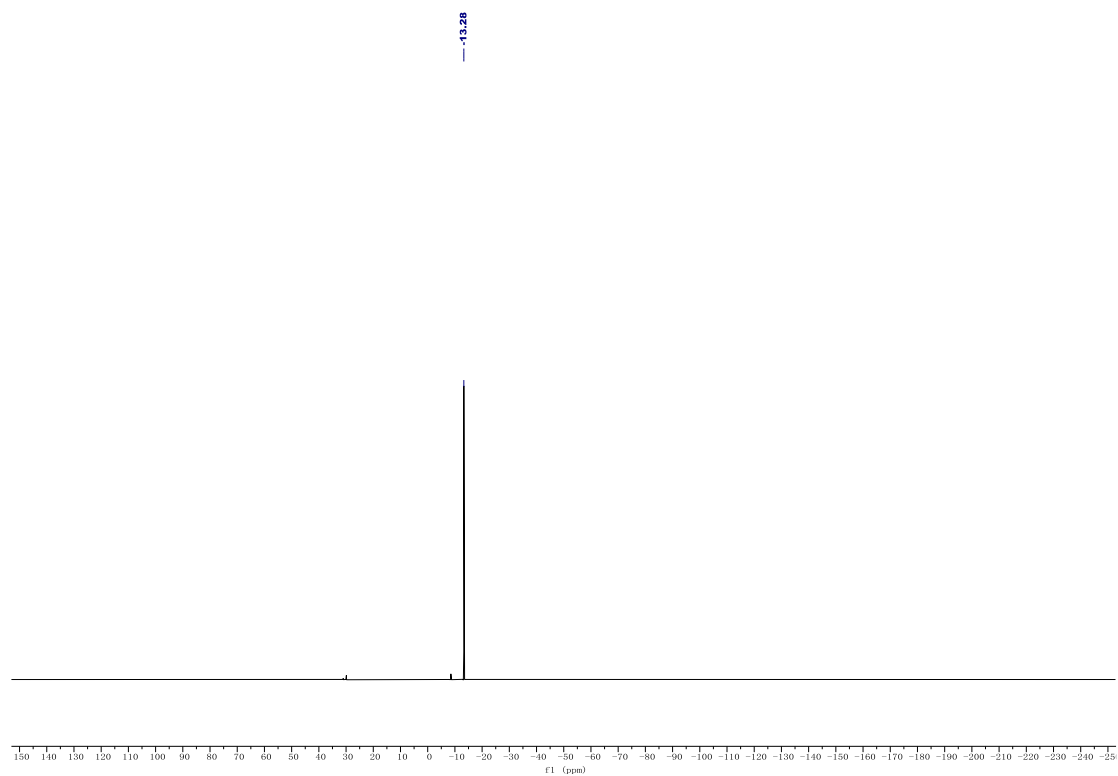

**(S)-N-((S)-1-(2-(diphenylphosphaneyl) phenyl) tert-butyl)-4-methylbenzenesulfonin**

**Amide (13):**

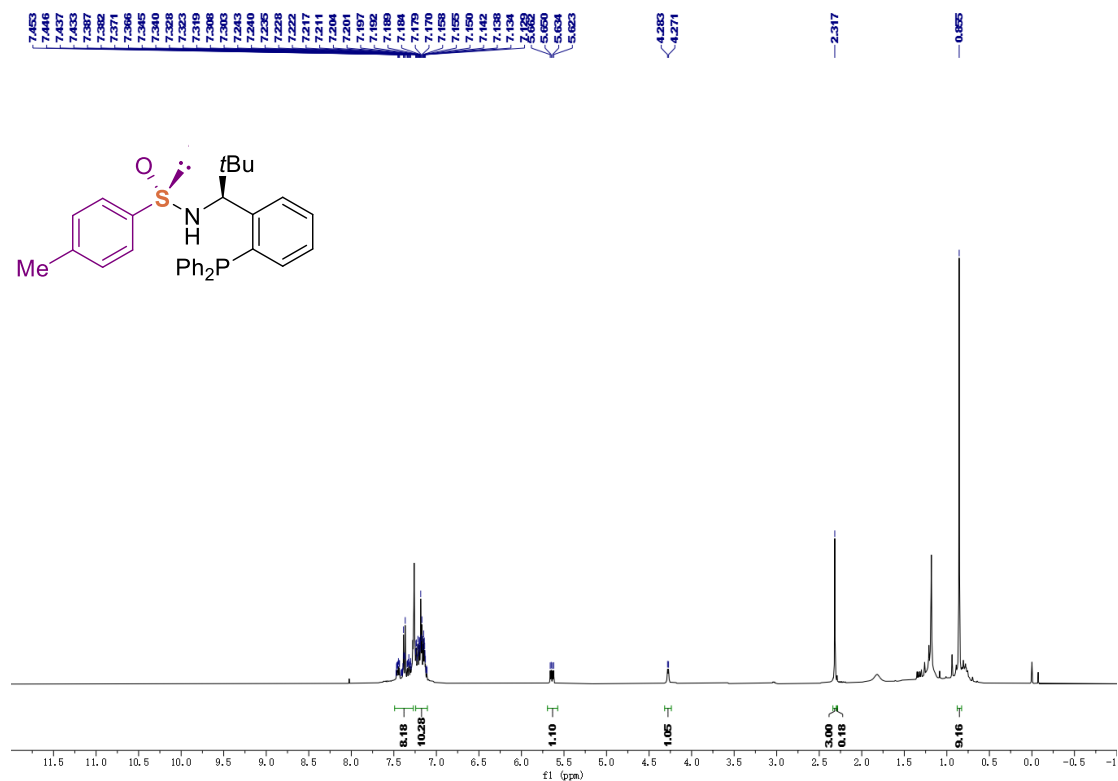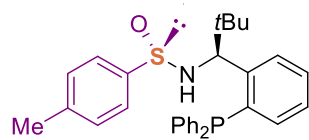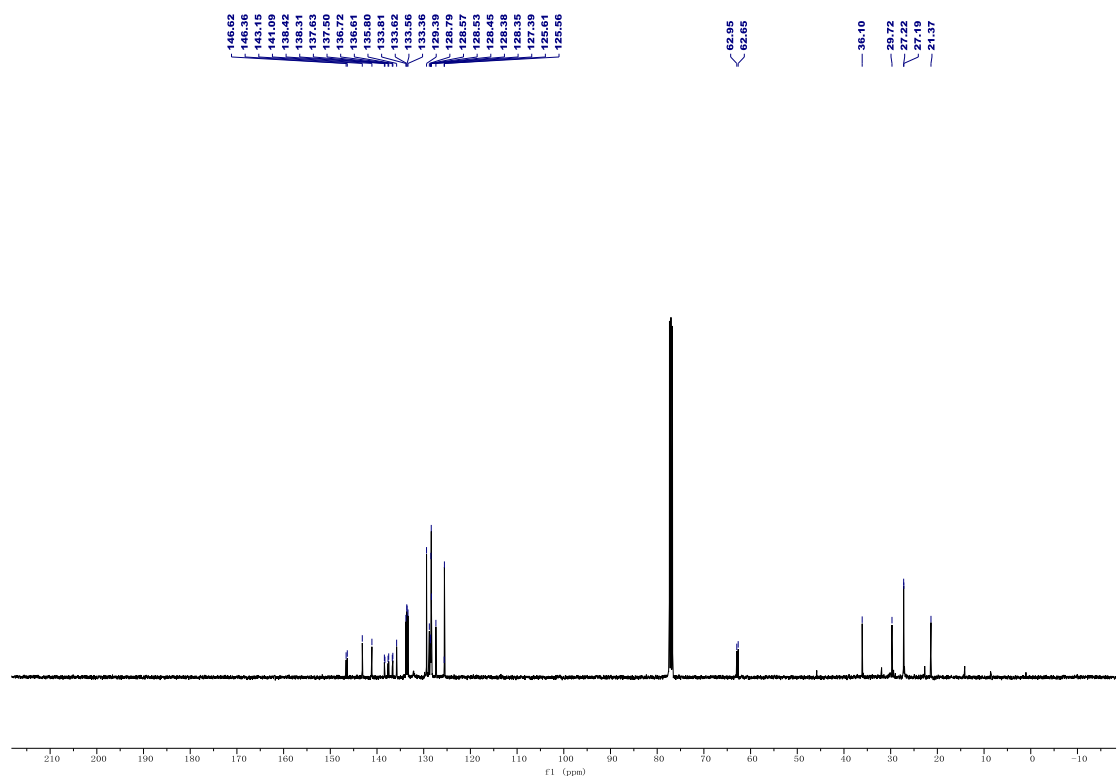



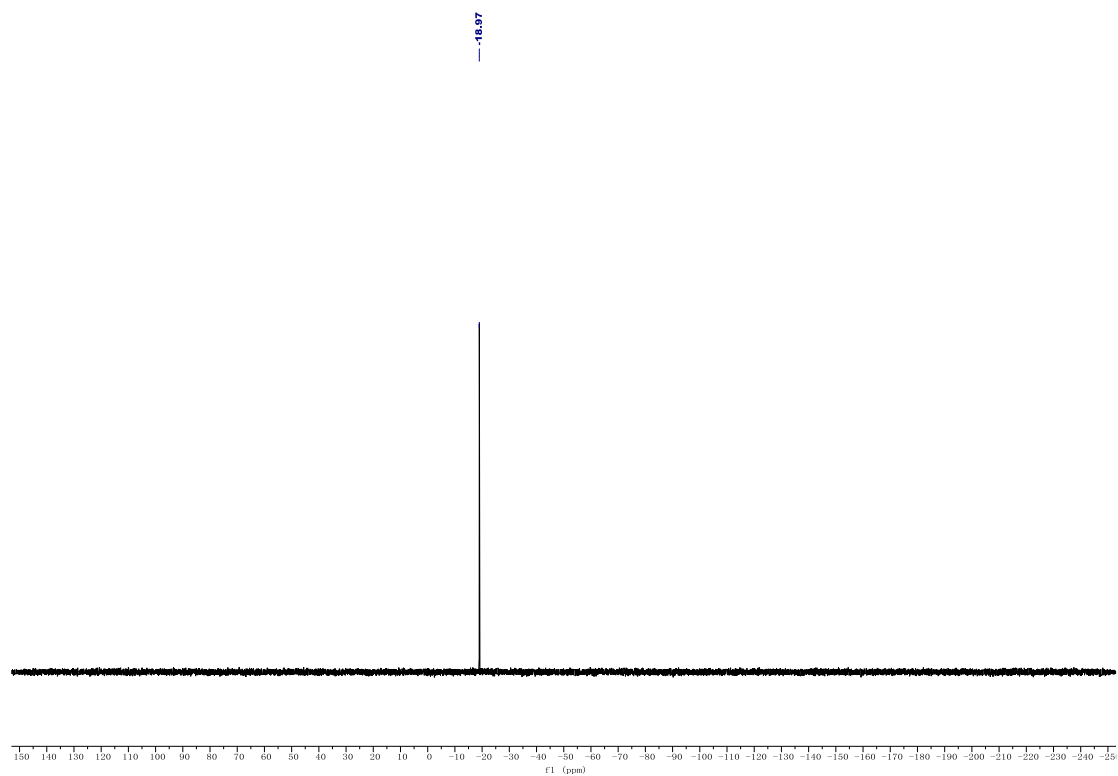

**(S)-N-Benzoyl-1-methyl-(p-tolyl)-oxidanesulfinimidic chloride (14):**

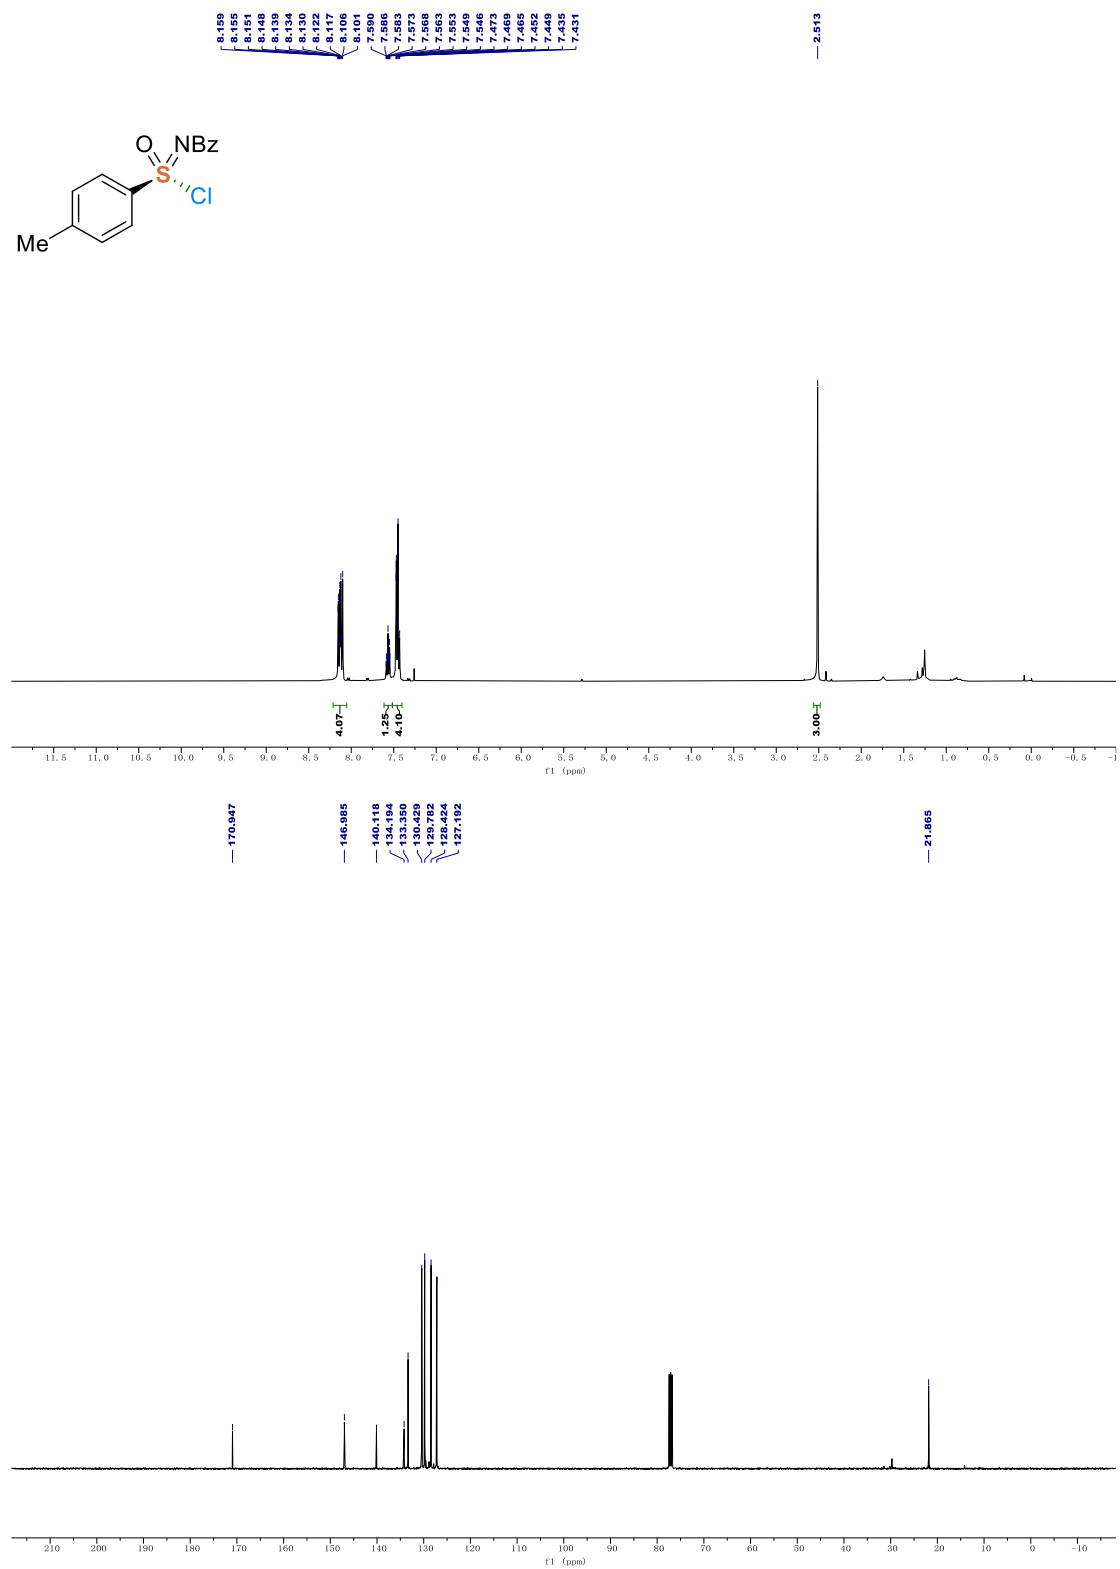

**(S)-4-Nitrophenyl N-benzoyl-4-methylbenzenesulfonimide (15):**

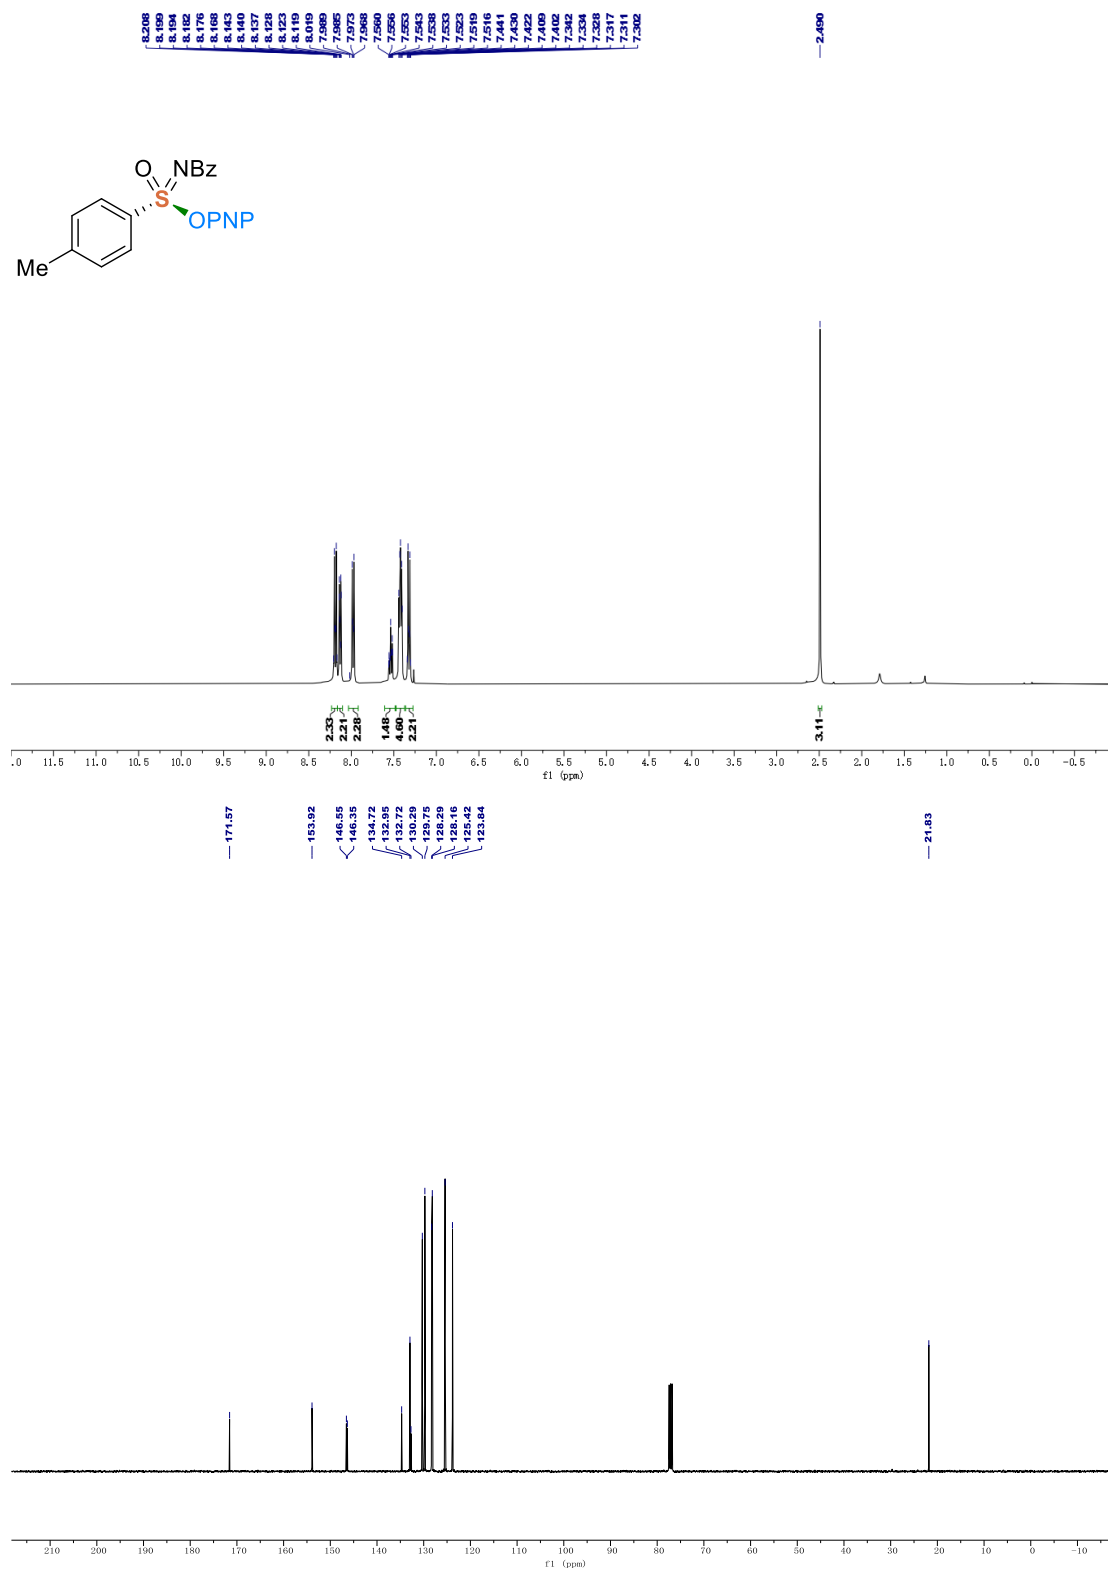

**(S)-Phenyl N-benzoyl-4-methylbenzenesulfonimide (16):**

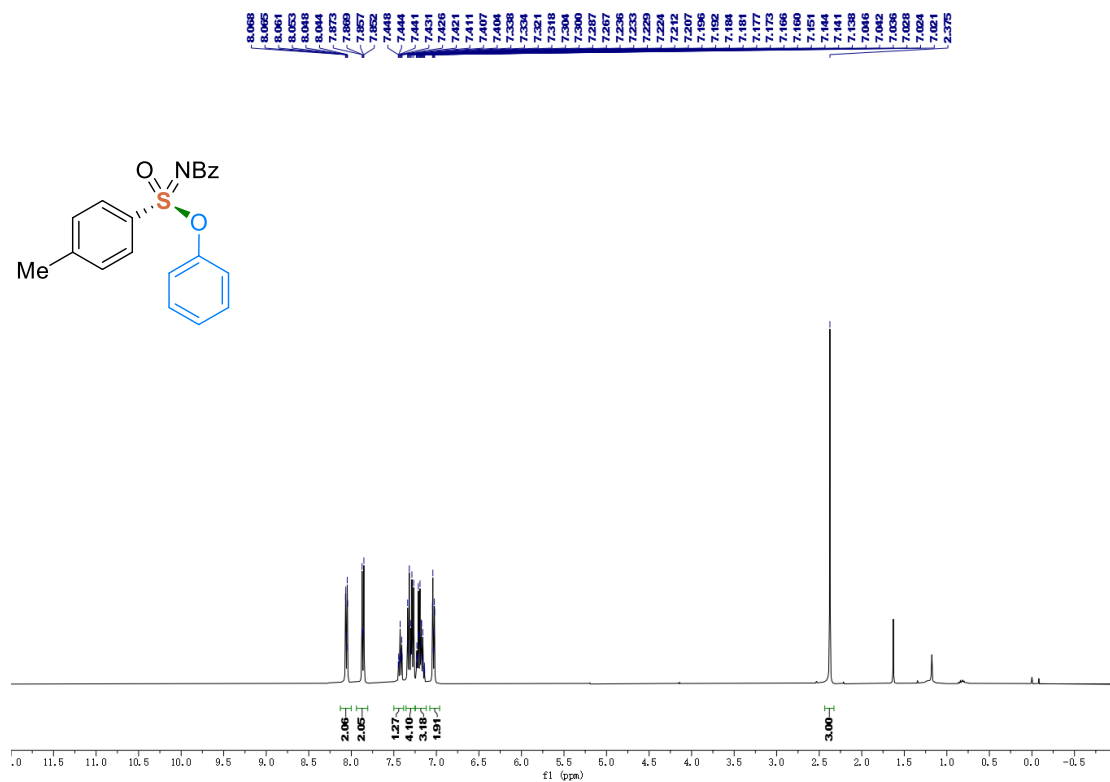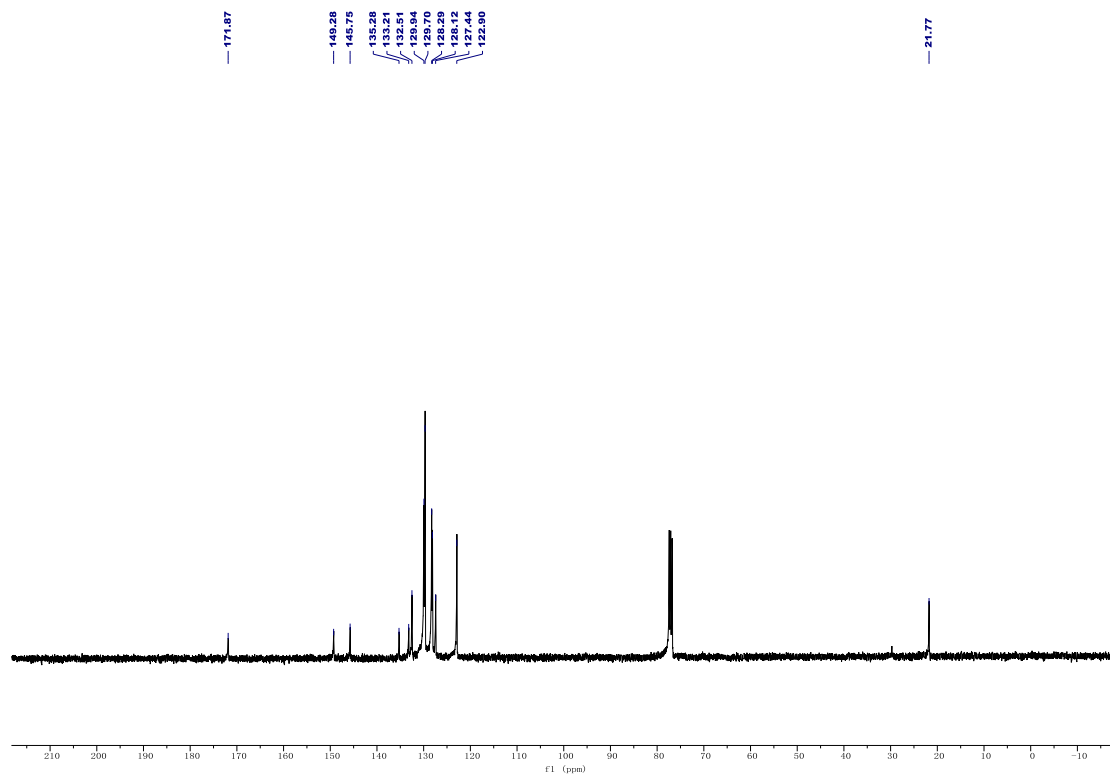

**(S)-4-Nitrophenyl N-benzoyl-4-methylbenzenesulfonimide (17):**

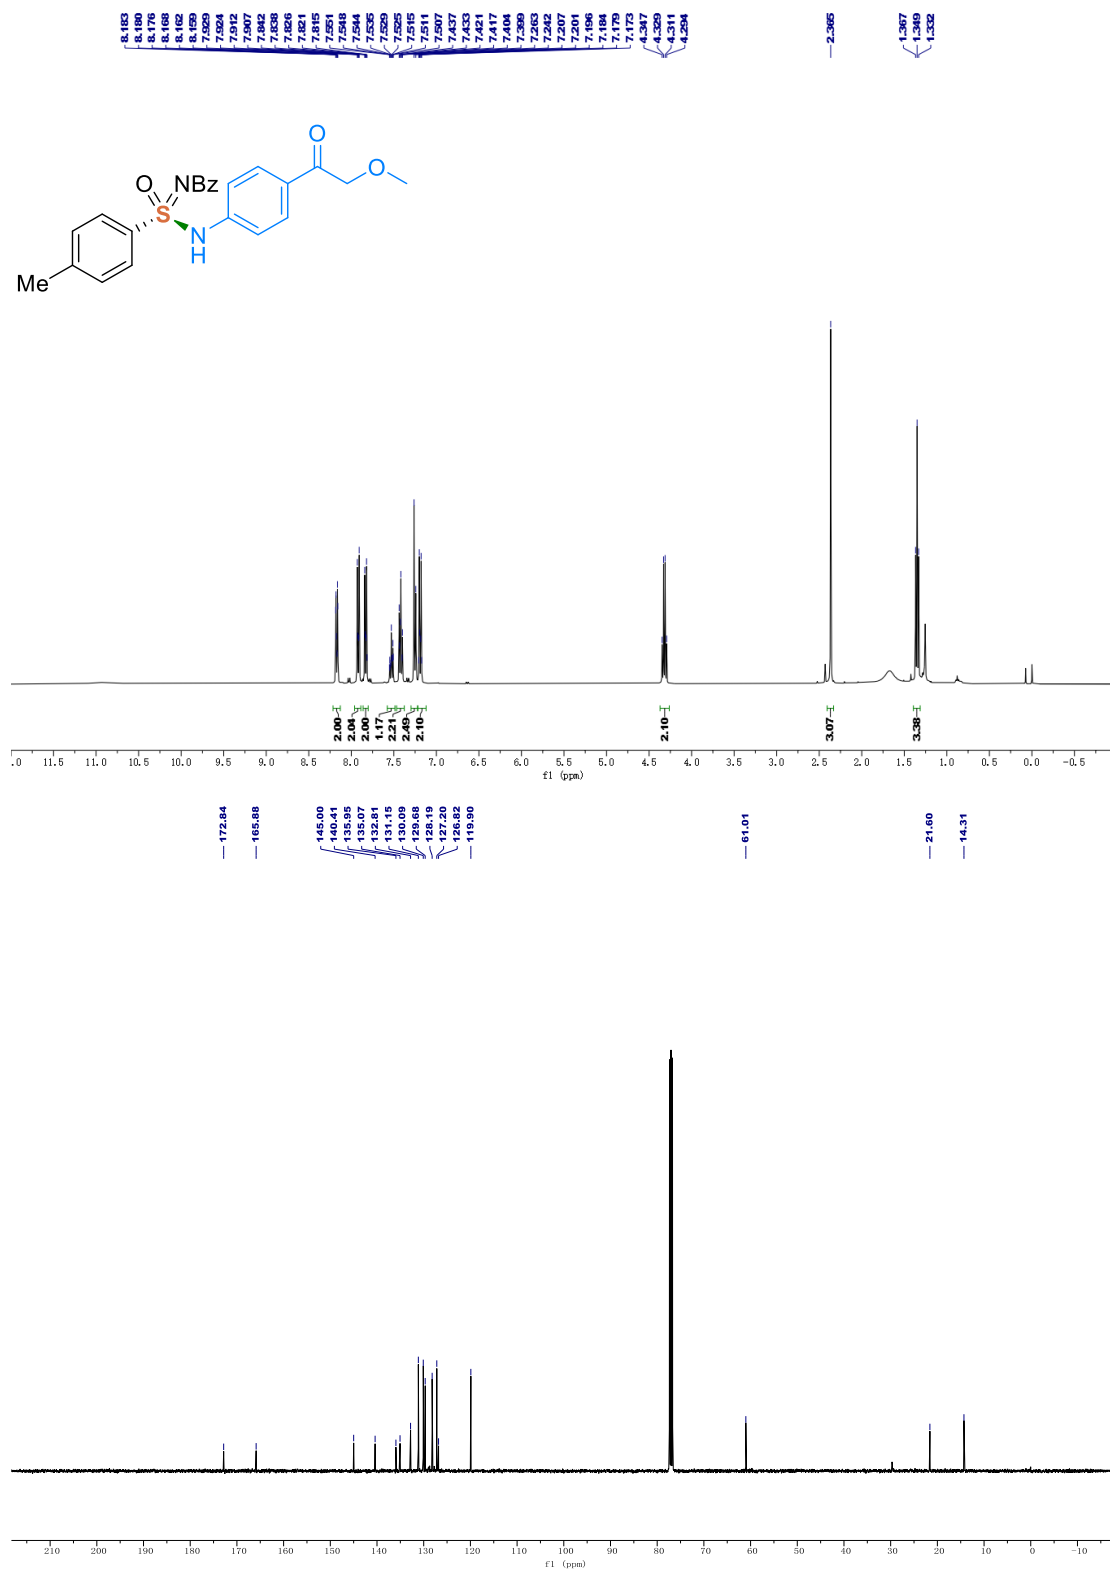

**((S)-N-(Oxo((1R,5R)-8-oxo-1,5,6,8-tetrahydro-2H-1,5-methanopyrido[1,2-a][1,5]diazocin-3(4H)-yl) (p-tolyl)-λ<sup>6</sup>-sulfaneylidene) benzamide (18):**

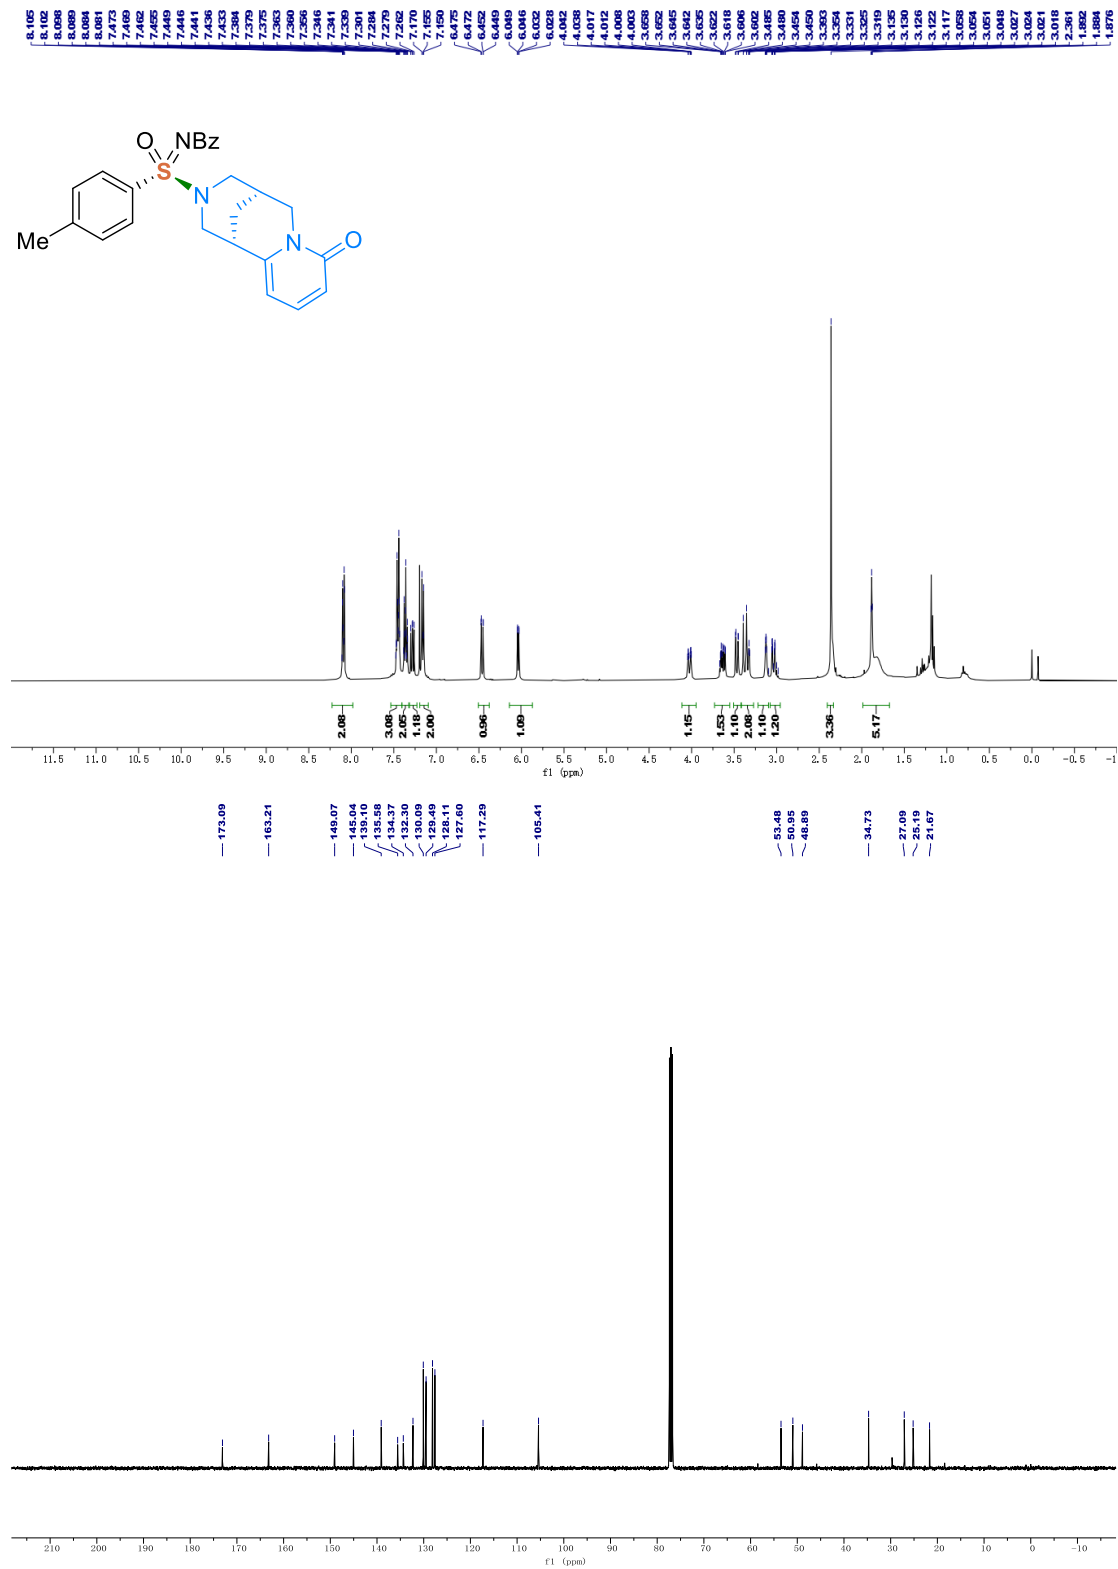

**(S)-3-Ethyl-5-methyl (4S)-2-((2-((N'-benzoyl-4-methylphenyl) sulfonoamidimidido) ethoxy) methyl)-4-(2-chlorophenyl)-6-methyl-1,4-dihydropyridine-3,5-dicarboxylate (20):**

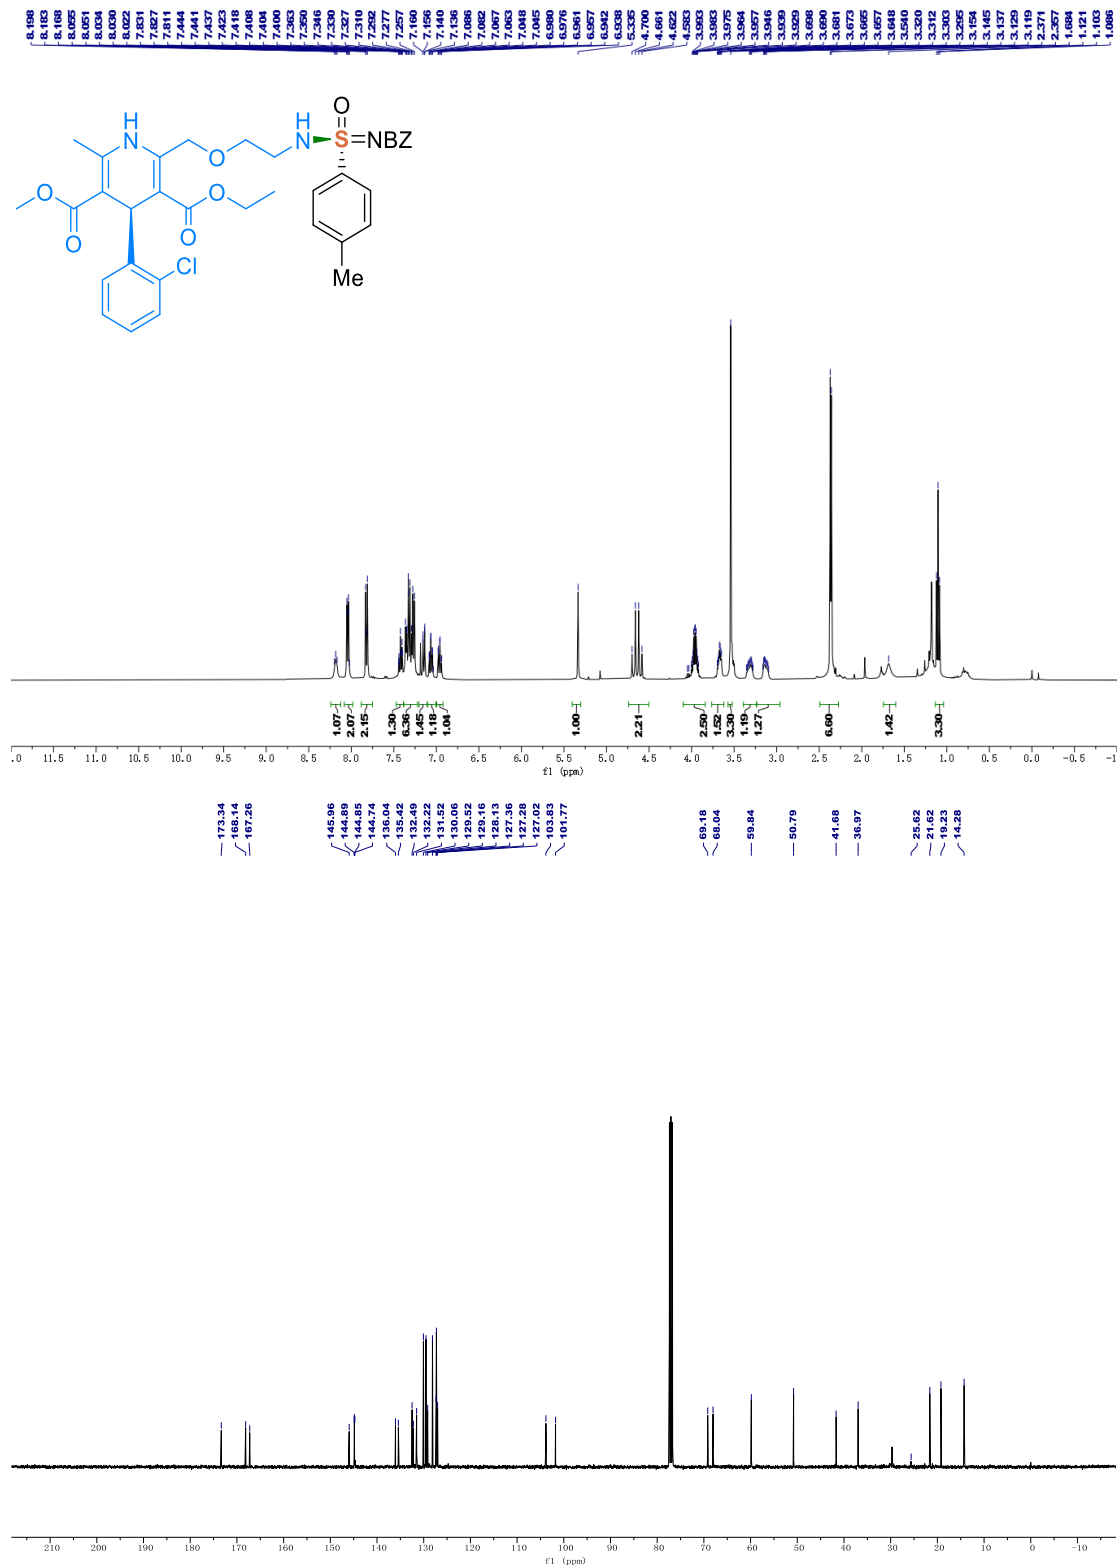

## 6. HPLC traces of the obtained chiral products

### (S)-4-Methylbenzenesulfonamide (4a):

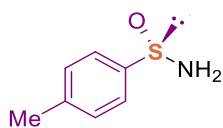

**HPLC conditions:** Chiralcel IA (*i*-PrOH/*n*-Hexane, 15 : 85), Flow: 1.0 mL.min<sup>-1</sup>, Temp: 25 °C.

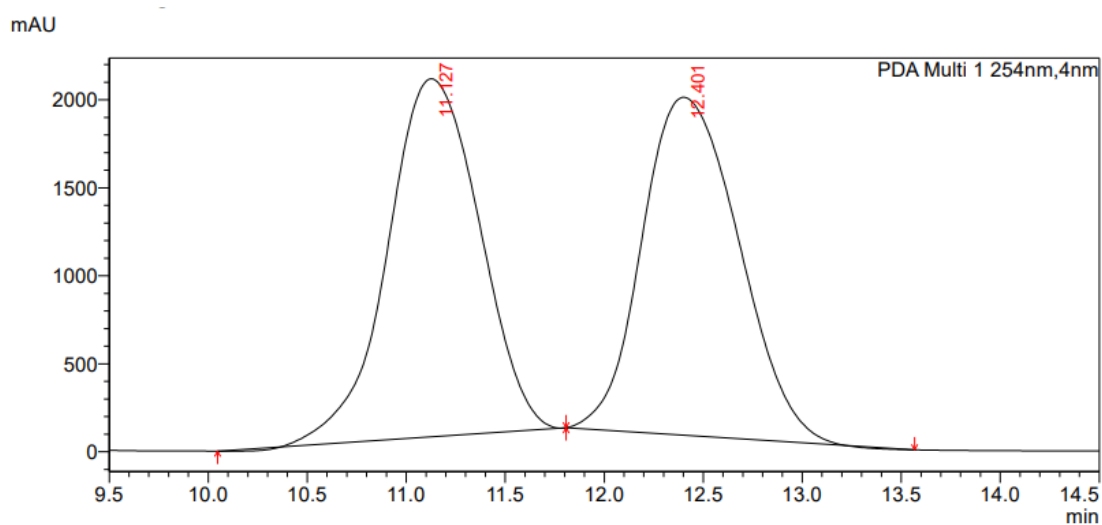

PDA Ch1 254nm

| Peak# | Ret. Time | Area      | Height  | Area%   |
|-------|-----------|-----------|---------|---------|
| 1     | 11.127    | 65745586  | 2034233 | 50.140  |
| 2     | 12.401    | 65379171  | 1920467 | 49.860  |
| Total |           | 131124756 | 3954700 | 100.000 |

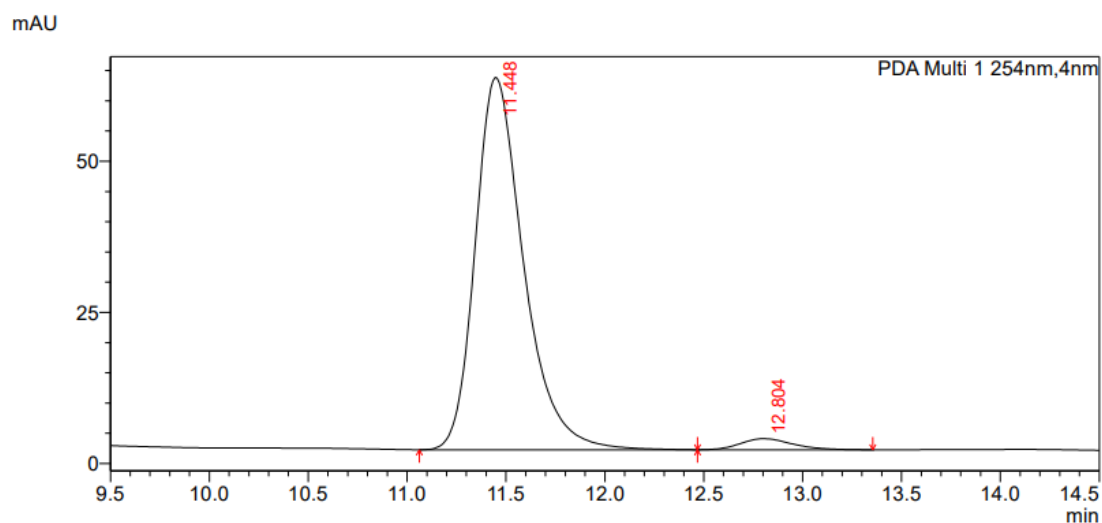

PDA Ch1 254nm

| Peak# | Ret. Time | Area    | Height | Area%   |
|-------|-----------|---------|--------|---------|
| 1     | 11.448    | 1050810 | 61595  | 96.890  |
| 2     | 12.804    | 33725   | 1836   | 3.110   |
| Total |           | 1084535 | 63431  | 100.000 |



**(R)-4-Methylbenzenesulfonamide (4a):**

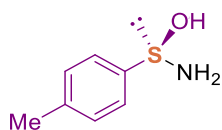

**HPLC conditions:** Chiralcel IA (*i*-PrOH/*n*-Hexane, 20: 80), Flow: 1.0 mL.min<sup>-1</sup>,  
Temp: 25 °C.

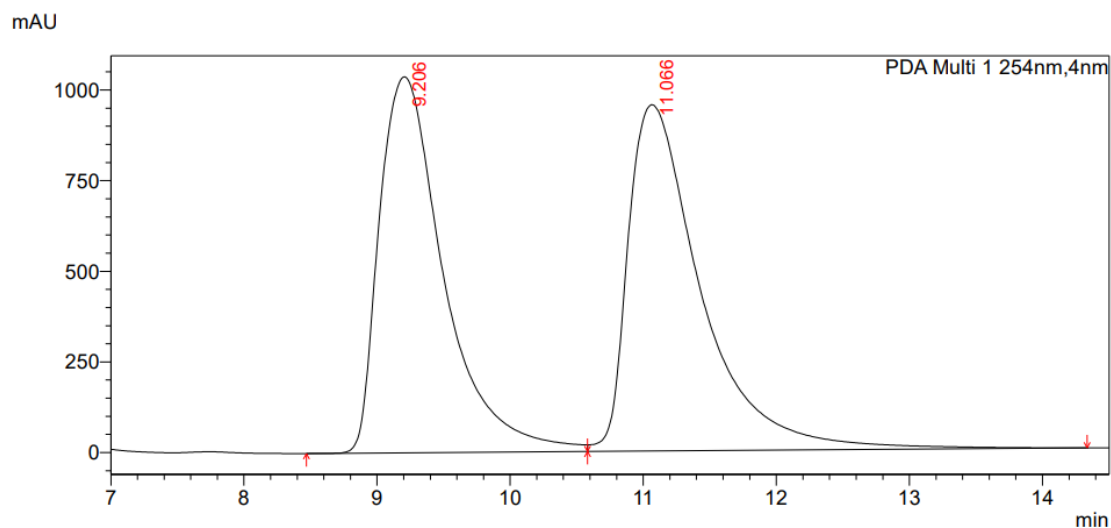

PDA Ch1 254nm

| Peak# | Ret. Time | Area     | Height  | Area%   |
|-------|-----------|----------|---------|---------|
| 1     | 9.206     | 34910412 | 1037015 | 48.809  |
| 2     | 11.066    | 36614795 | 955024  | 51.191  |
| Total |           | 71525207 | 1992039 | 100.000 |

mAU

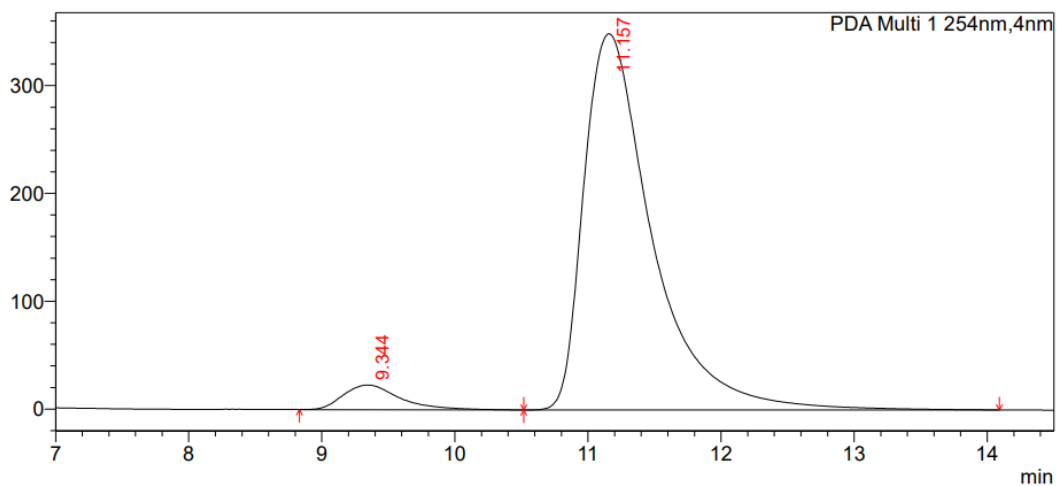

PDA Ch1 254nm

| Peak# | Ret. Time | Area     | Height | Area%   |
|-------|-----------|----------|--------|---------|
| 1     | 9.344     | 674147   | 22860  | 5.124   |
| 2     | 11.157    | 12482455 | 348931 | 94.876  |
| Total |           | 13156602 | 371791 | 100.000 |

**<sup>15</sup>N-4a**

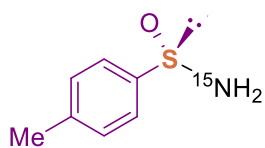

**HPLC conditions:** Chiralcel IA (*i*-PrOH/*n*-Hexane, 20 : 80), Flow: 1.0 mL.min<sup>-1</sup>,

Temp: 25 °C.

mAU

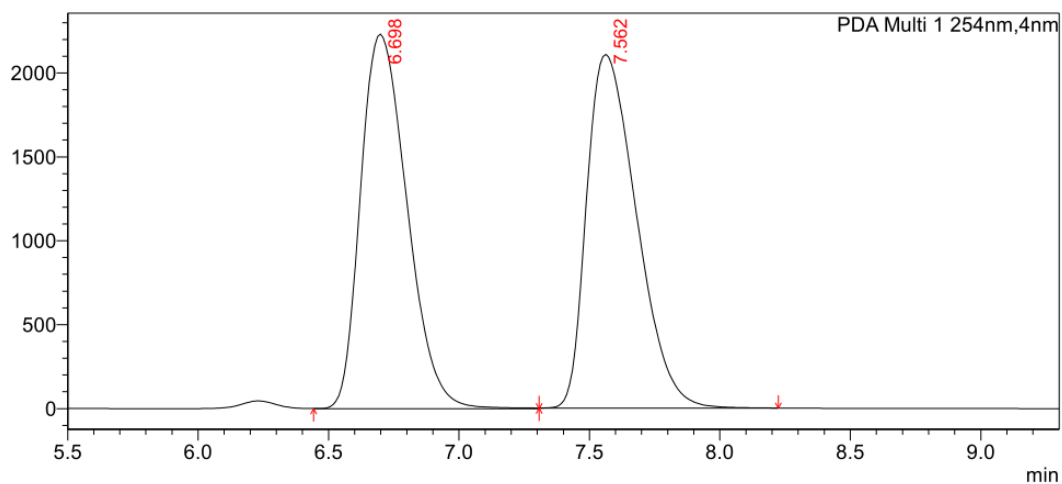

PDA Ch1 254nm

| Peak# | Ret. Time | Area     | Height  | Area%   |
|-------|-----------|----------|---------|---------|
| 1     | 6.698     | 27674156 | 2232162 | 49.700  |
| 2     | 7.562     | 28008607 | 2107660 | 50.300  |
| Total |           | 55682763 | 4339822 | 100.000 |

mAU

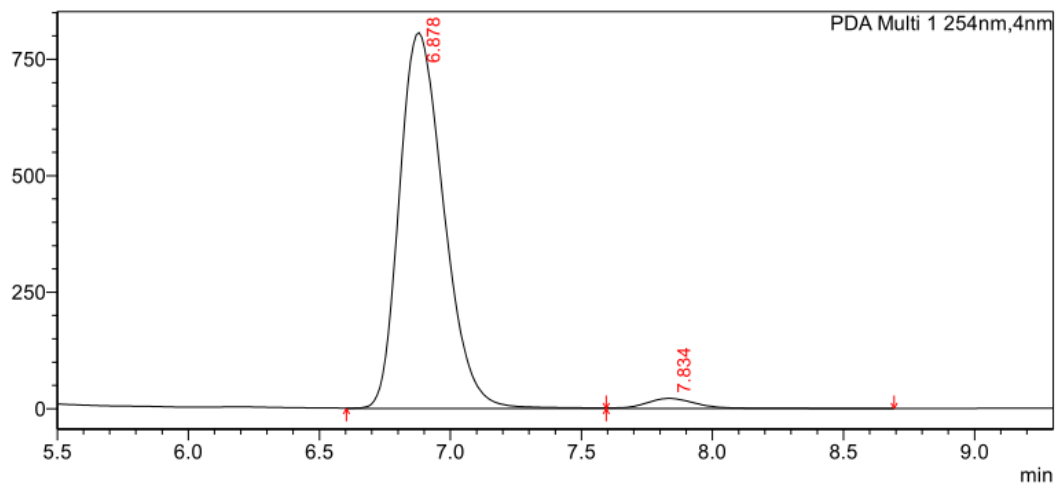

PDA Ch1 254nm

| Peak# | Ret. Time | Area    | Height | Area%   |
|-------|-----------|---------|--------|---------|
| 1     | 6.878     | 9517216 | 806872 | 97.083  |
| 2     | 7.834     | 285949  | 21746  | 2.917   |
| Total |           | 9803165 | 828618 | 100.000 |

**(S)-Benzenesulfinamide (4b):**

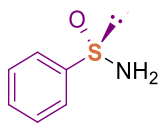

**HPLC conditions:** Chiralcel OJ-H (*i*-PrOH/*n*-Hexane, 10:90), Flow: 1.0 mL.min<sup>-1</sup>,

Temp: 25 °C.

mAU

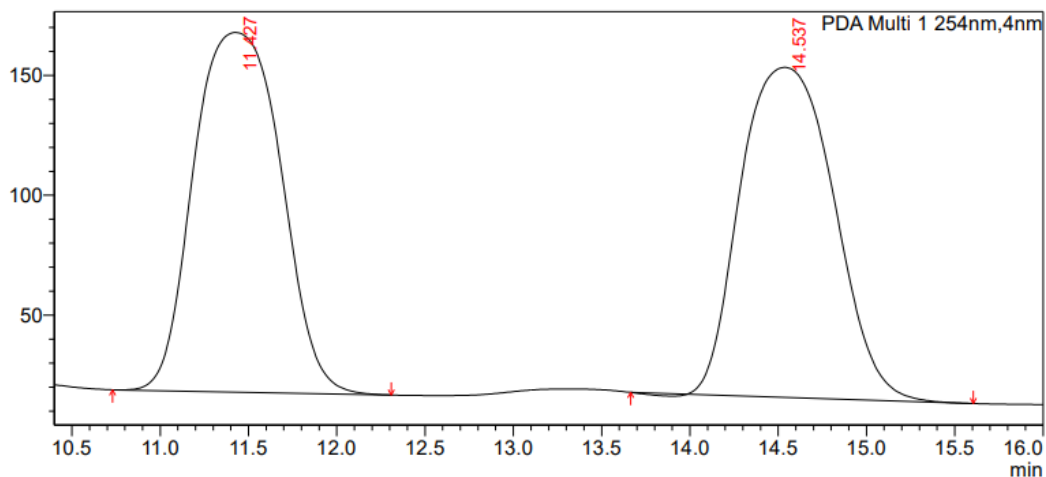

PDA Ch1 254nm

| Peak# | Ret. Time | Area     | Height | Area%   |
|-------|-----------|----------|--------|---------|
| 1     | 11.427    | 5159547  | 149891 | 50.452  |
| 2     | 14.537    | 5067011  | 137575 | 49.548  |
| Total |           | 10226558 | 287466 | 100.000 |

mAU

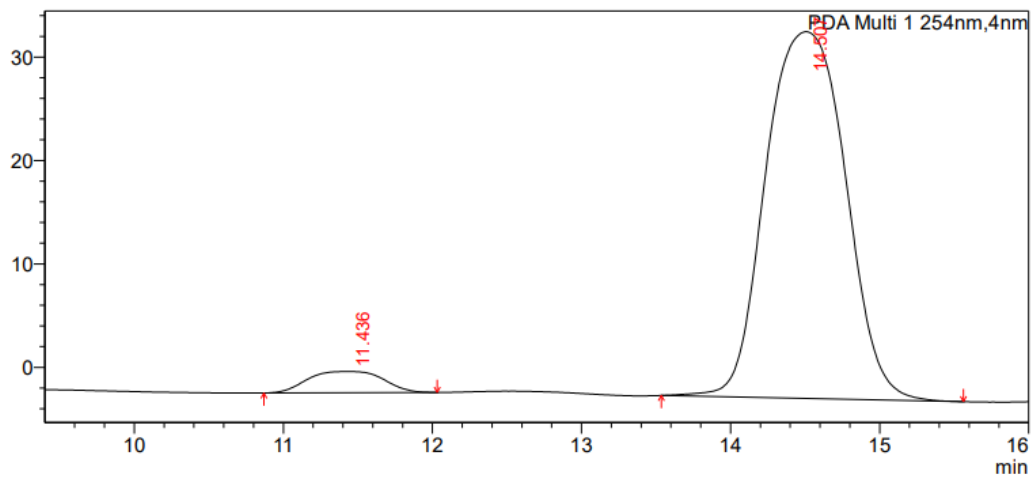

PDA Ch1 254nm

| Peak# | Ret. Time | Area    | Height | Area%   |
|-------|-----------|---------|--------|---------|
| 1     | 11.436    | 71638   | 2060   | 5.139   |
| 2     | 14.507    | 1322327 | 35459  | 94.861  |
| Total |           | 1393965 | 37519  | 100.000 |

**(S)-4-Isopropylbenzenesulfonamide (4c):**

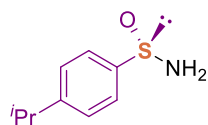

**HPLC conditions:** Chiralcel IB (*i*-PrOH/*n*-Hexane, 20:80), Flow: 1.0 mL·min<sup>-1</sup>, Temp: 25 °C.

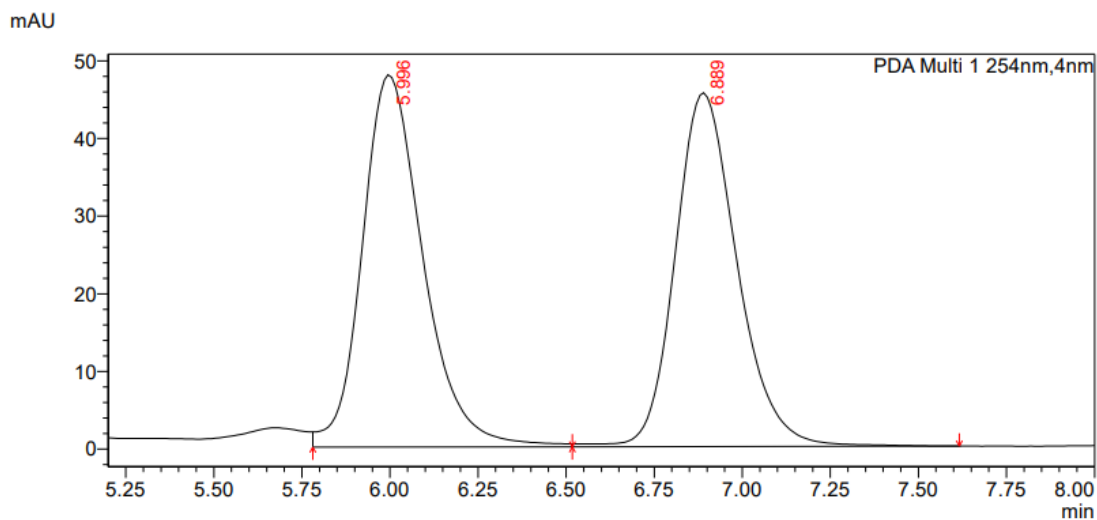

PDA Ch1 254nm

| Peak# | Ret. Time | Area    | Height | Area%   |
|-------|-----------|---------|--------|---------|
| 1     | 5.996     | 576198  | 47951  | 50.808  |
| 2     | 6.889     | 557866  | 45571  | 49.192  |
| Total |           | 1134064 | 93523  | 100.000 |

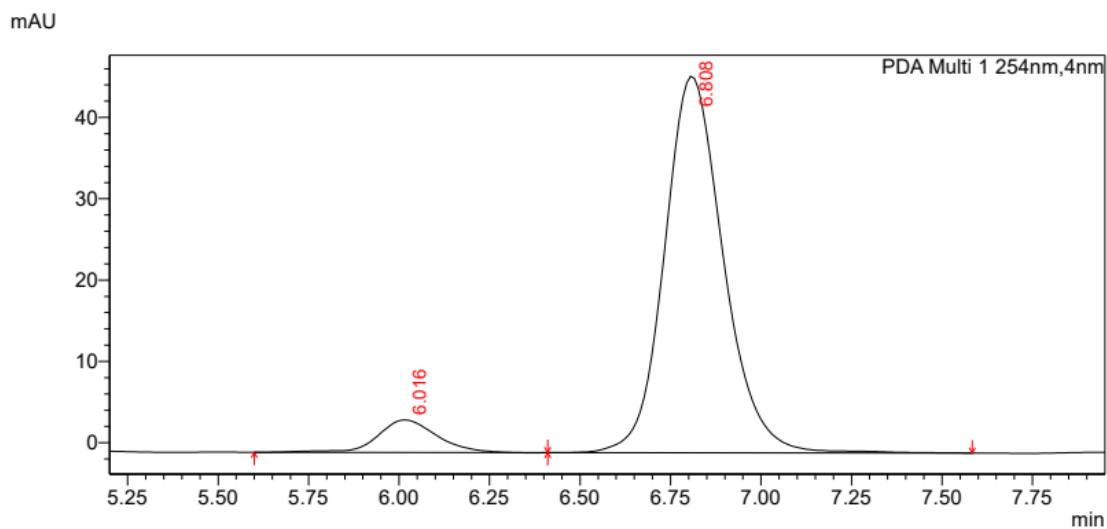

PDA Ch1 254nm

| Peak# | Ret. Time | Area   | Height | Area%   |
|-------|-----------|--------|--------|---------|
| 1     | 6.016     | 45795  | 4008   | 8.011   |
| 2     | 6.808     | 525888 | 46298  | 91.989  |
| Total |           | 571683 | 50306  | 100.000 |

**(S)-4-Tert-Butylbenzenesulfonamide (4d):**

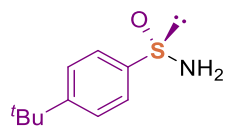

**HPLC conditions:** Chiralcel IB (*i*-PrOH/*n*-Hexane, 20:80), Flow: 1.0 mL·min<sup>-1</sup>, Temp: 25 °C.

mAU

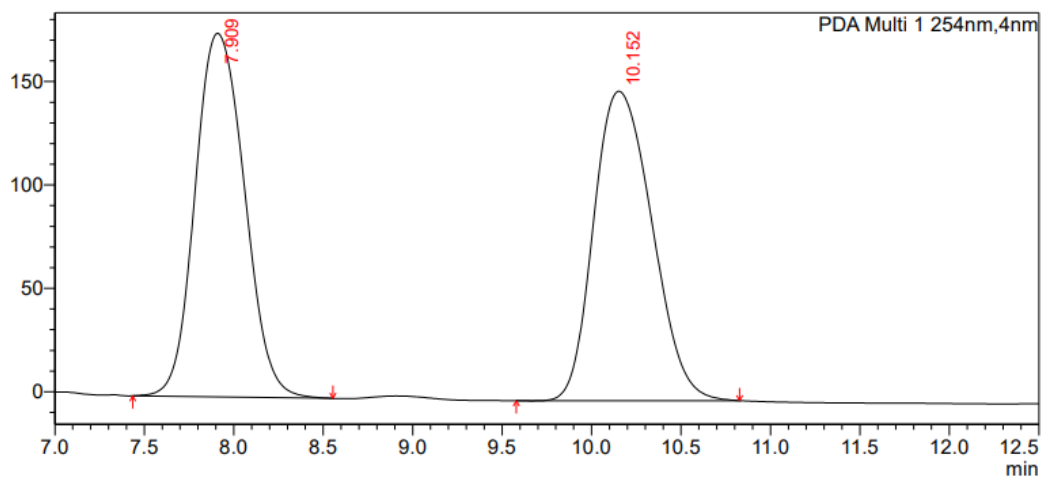

PDA Ch1 254nm

| Peak# | Ret. Time | Area    | Height | Area%   |
|-------|-----------|---------|--------|---------|
| 1     | 7.909     | 3383697 | 175755 | 49.912  |
| 2     | 10.152    | 3395633 | 149635 | 50.088  |
| Total |           | 6779330 | 325390 | 100.000 |

mAU

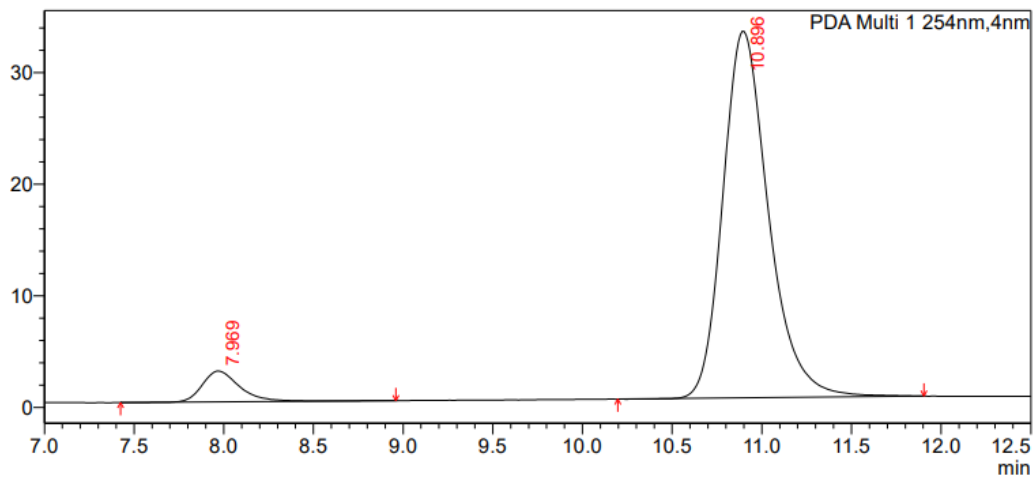

PDA Ch1 254nm

| Peak# | Ret. Time | Area   | Height | Area%   |
|-------|-----------|--------|--------|---------|
| 1     | 7.969     | 40492  | 2760   | 6.506   |
| 2     | 10.896    | 581866 | 32861  | 93.494  |
| Total |           | 622359 | 35621  | 100.000 |

**(S)-[1,1'-Biphenyl]-4-sulfonamide (4e):**

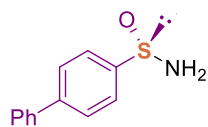

**HPLC conditions:** Chiralcel IB (*i*-PrOH/*n*-Hexane, 20:80), Flow: 1.0 mL.min<sup>-1</sup>, Temp: 25 °C.

**<Chromatogram>**

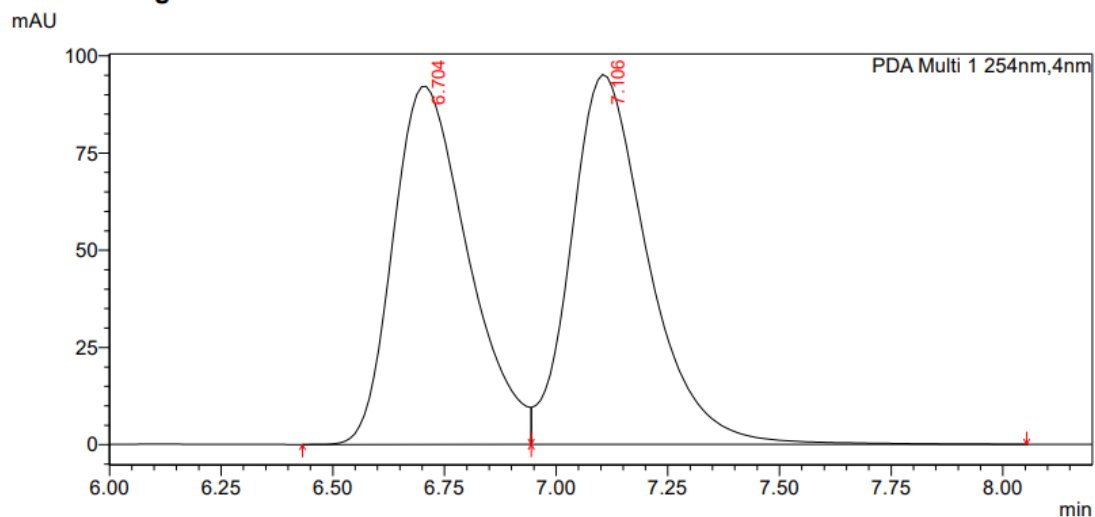

PDA Ch1 254nm

| Peak# | Ret. Time | Area    | Height | Area%   |
|-------|-----------|---------|--------|---------|
| 1     | 6.704     | 1078338 | 92050  | 48.585  |
| 2     | 7.106     | 1141164 | 95105  | 51.415  |
| Total |           | 2219502 | 187155 | 100.000 |

**<Chromatogram>**

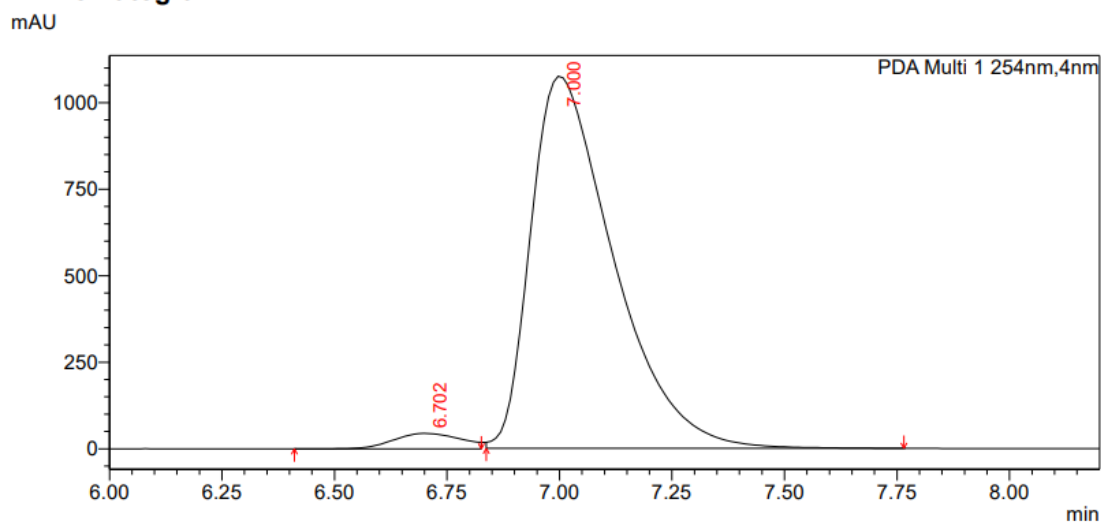

PDA Ch1 254nm

| Peak# | Ret. Time | Area     | Height  | Area%   |
|-------|-----------|----------|---------|---------|
| 1     | 6.702     | 465835   | 44477   | 3.273   |
| 2     | 7.000     | 13766202 | 1075217 | 96.727  |
| Total |           | 14232037 | 1119694 | 100.000 |

<sup>15</sup>N-4e

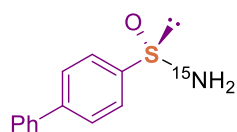

**HPLC conditions:** Chiralcel IB (*i*-PrOH/*n*-Hexane, 20:80), Flow: 1.0 mL·min<sup>-1</sup>, Temp: 25 °C.

mAU

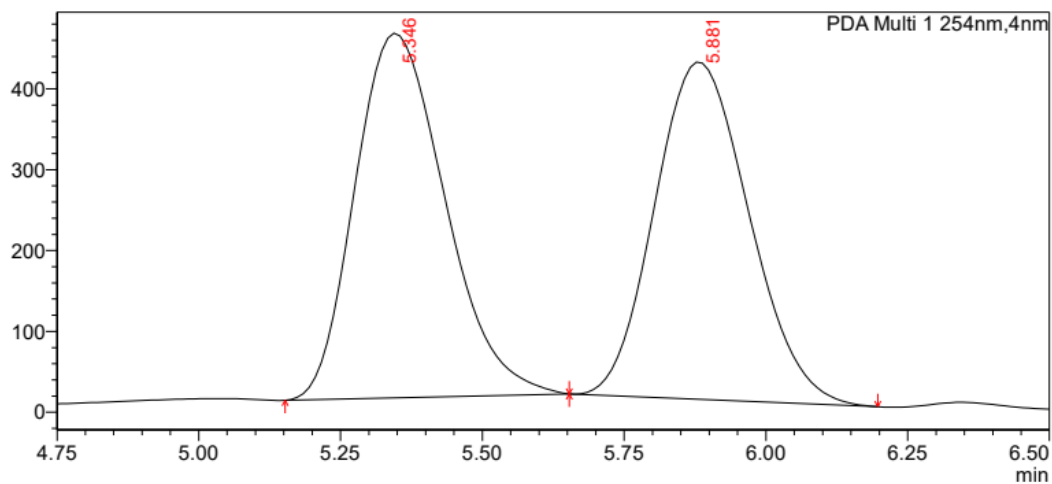

PDA Ch1 254nm

| Peak# | Ret. Time | Area    | Height | Area%   |
|-------|-----------|---------|--------|---------|
| 1     | 5.346     | 4976665 | 450900 | 50.780  |
| 2     | 5.881     | 4823849 | 416990 | 49.220  |
| Total |           | 9800515 | 867890 | 100.000 |

mAU

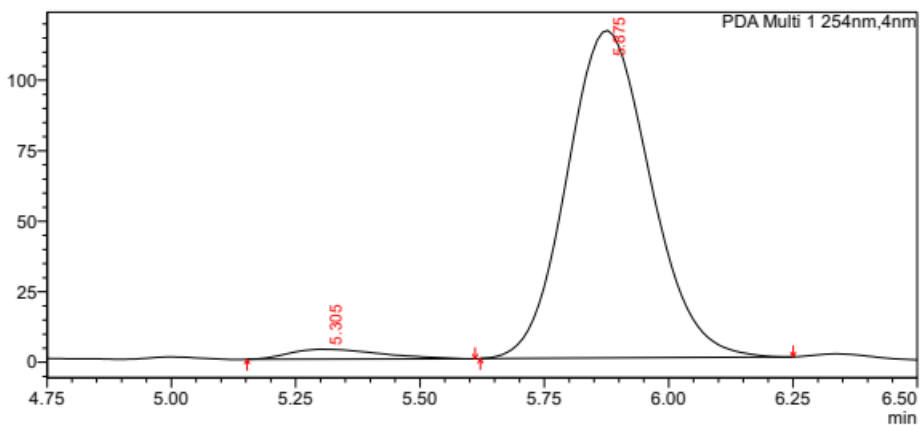

PDA Ch1 254nm

| Peak# | Ret. Time | Area    | Height | Area%   |
|-------|-----------|---------|--------|---------|
| 1     | 5.305     | 44346   | 3495   | 3.170   |
| 2     | 5.875     | 1354507 | 116083 | 96.830  |
| Total |           | 1398853 | 119578 | 100.000 |

**(S)-4-Methoxybenzenesulfonamide (4f):**

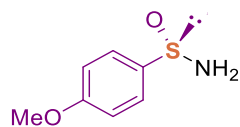

**HPLC conditions:** Chiralcel IA (*i*-PrOH/*n*-Hexane, 10:90), Flow: 1.0 mL·min<sup>-1</sup>, Temp: 25 °C.

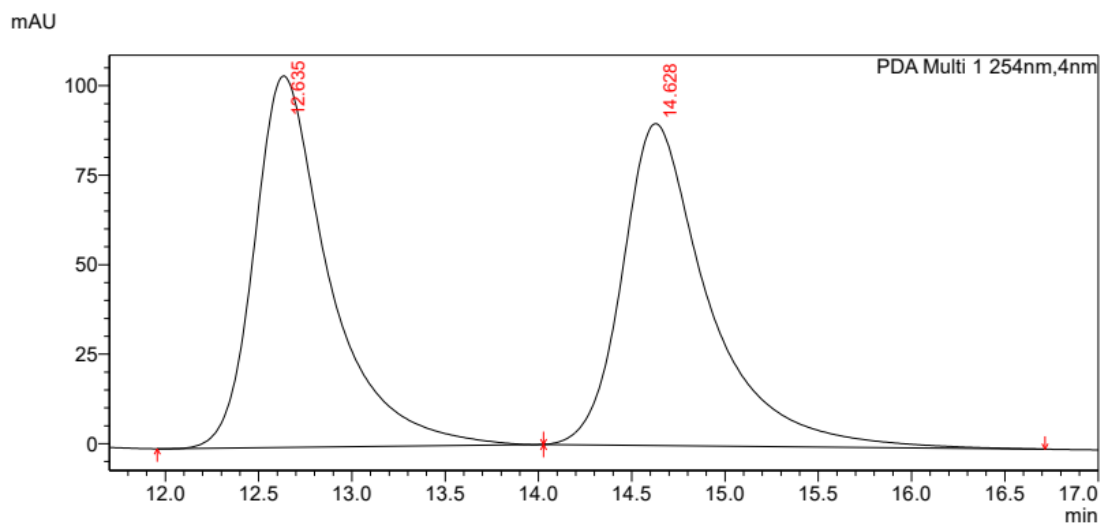

PDA Ch1 254nm

| Peak# | Ret. Time | Area    | Height | Area%   |
|-------|-----------|---------|--------|---------|
| 1     | 12.635    | 2899870 | 103718 | 49.951  |
| 2     | 14.628    | 2905517 | 89929  | 50.049  |
| Total |           | 5805387 | 193647 | 100.000 |

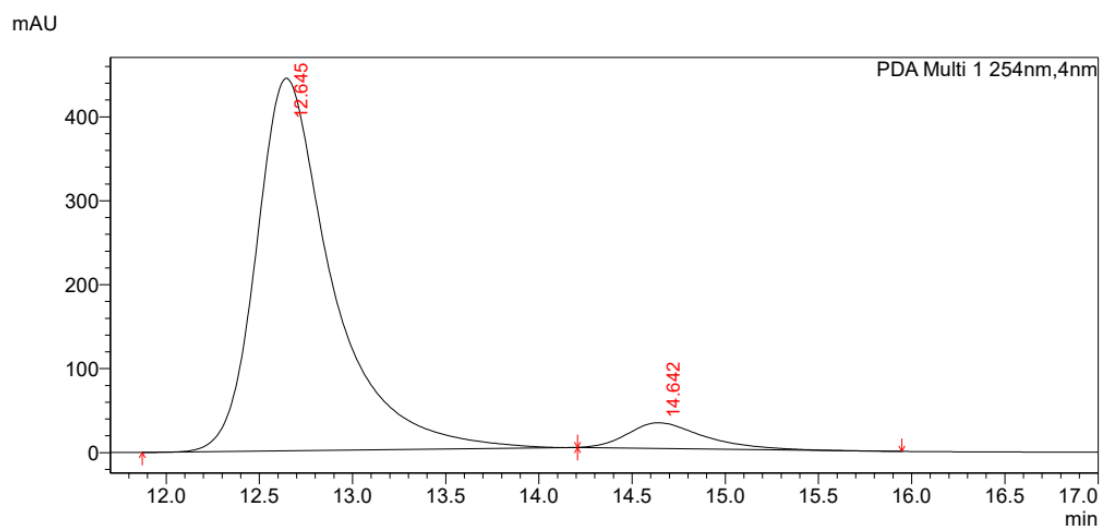

PDA Ch1 254nm

| Peak# | Ret. Time | Area     | Height | Area%   |
|-------|-----------|----------|--------|---------|
| 1     | 12.645    | 12595974 | 443596 | 93.518  |
| 2     | 14.642    | 873121   | 30612  | 6.482   |
| Total |           | 13469095 | 474208 | 100.000 |



**(S)-4-Fluorobenzenesulfinamide (4g):**

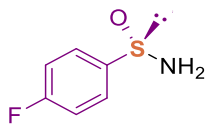

**HPLC conditions:** Chiralcel IB (*i*-PrOH/*n*-Hexane, 20:80), Flow: 1.0 mL.min<sup>-1</sup>, Temp: 25 °C.

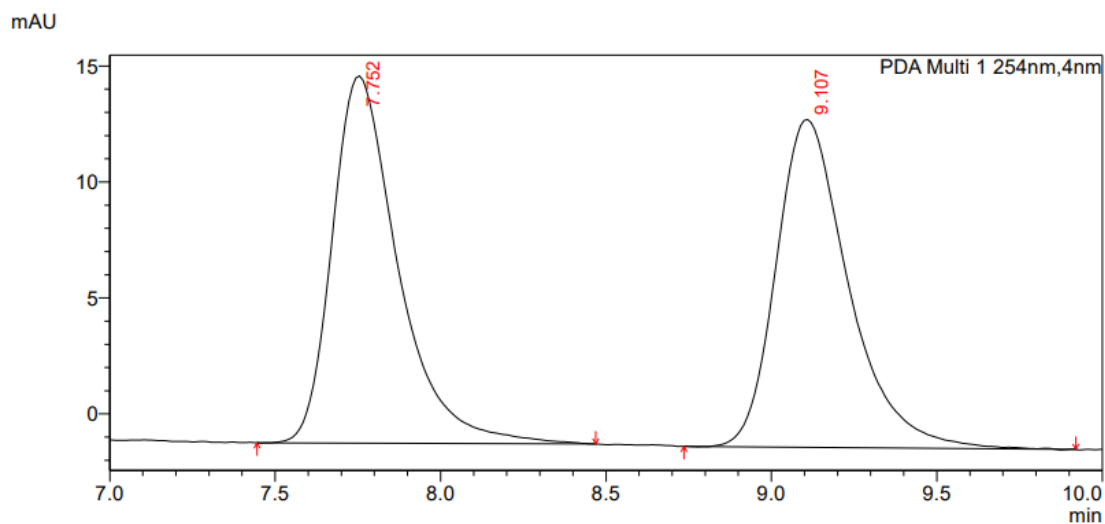

PDA Ch1 254nm

| Peak# | Ret. Time | Area   | Height | Area%   |
|-------|-----------|--------|--------|---------|
| 1     | 7.752     | 219079 | 15825  | 50.390  |
| 2     | 9.107     | 215687 | 14130  | 49.610  |
| Total |           | 434766 | 29955  | 100.000 |

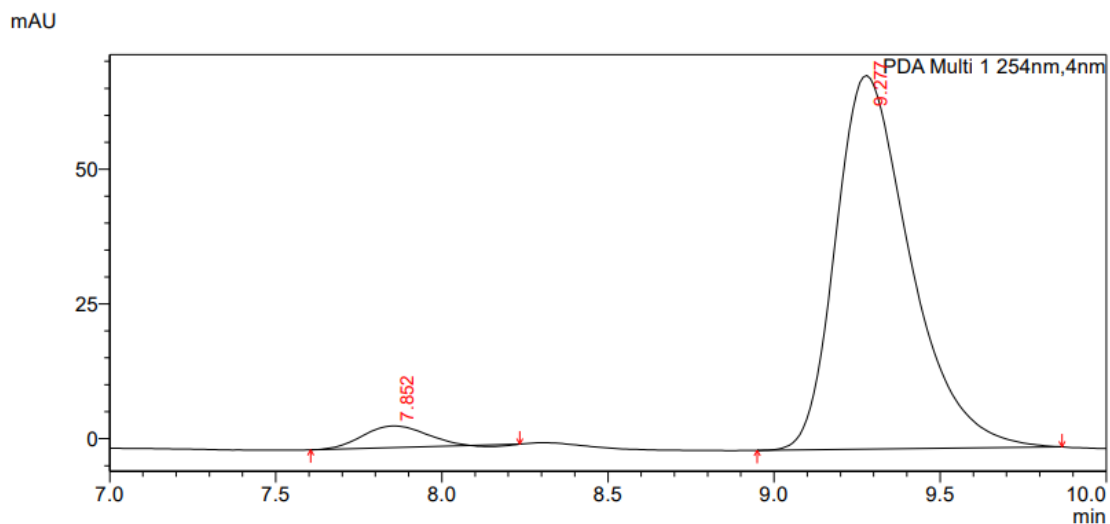

PDA Ch1 254nm

| Peak# | Ret. Time | Area    | Height | Area%   |
|-------|-----------|---------|--------|---------|
| 1     | 7.852     | 52169   | 4017   | 4.593   |
| 2     | 9.277     | 1083778 | 69290  | 95.407  |
| Total |           | 1135947 | 73308  | 100.000 |

**(S)-4-Chlorobenzenesulfinamide (4h):**

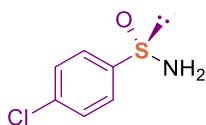

**HPLC conditions:** Chiralcel IB (*i*-PrOH/*n*-Hexane, 20:80), Flow: 1.0 mL·min<sup>-1</sup>, Temp: 25 °C.

mAU

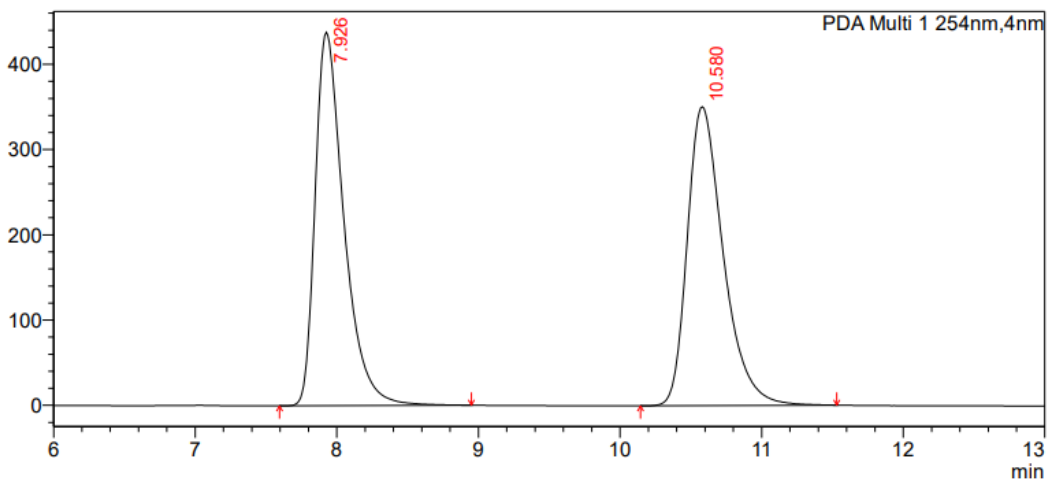

PDA Ch1 254nm

| Peak# | Ret. Time | Area     | Height | Area%   |
|-------|-----------|----------|--------|---------|
| 1     | 7.926     | 6197950  | 437893 | 49.998  |
| 2     | 10.580    | 6198503  | 350584 | 50.002  |
| Total |           | 12396454 | 788478 | 100.000 |

mAU

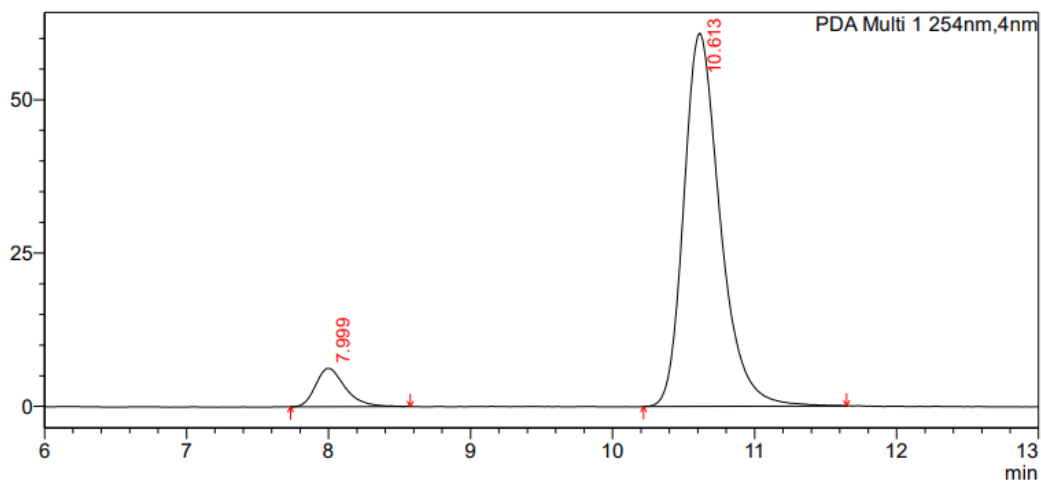

PDA Ch1 254nm

| Peak# | Ret. Time | Area    | Height | Area%   |
|-------|-----------|---------|--------|---------|
| 1     | 7.999     | 90707   | 6256   | 7.722   |
| 2     | 10.613    | 1083945 | 60819  | 92.278  |
| Total |           | 1174652 | 67075  | 100.000 |

**(S)-4-Bromobenzenesulfonamide (4i):**

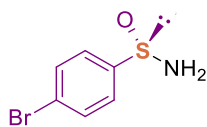

**HPLC conditions:** Chiralcel IA (*i*-PrOH/*n*-Hexane, 20:80), Flow: 1.0 mL.min<sup>-1</sup>, Temp: 25 °C.

mAU

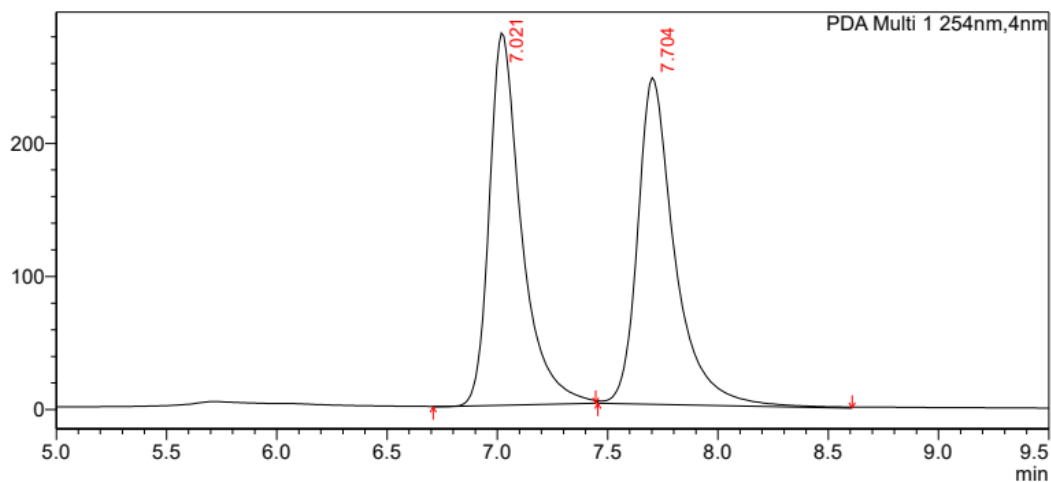

PDA Ch1 254nm

| Peak# | Ret. Time | Area    | Height | Area%   |
|-------|-----------|---------|--------|---------|
| 1     | 7.021     | 2841733 | 279624 | 49.619  |
| 2     | 7.704     | 2885326 | 245214 | 50.381  |
| Total |           | 5727059 | 524838 | 100.000 |

mAU

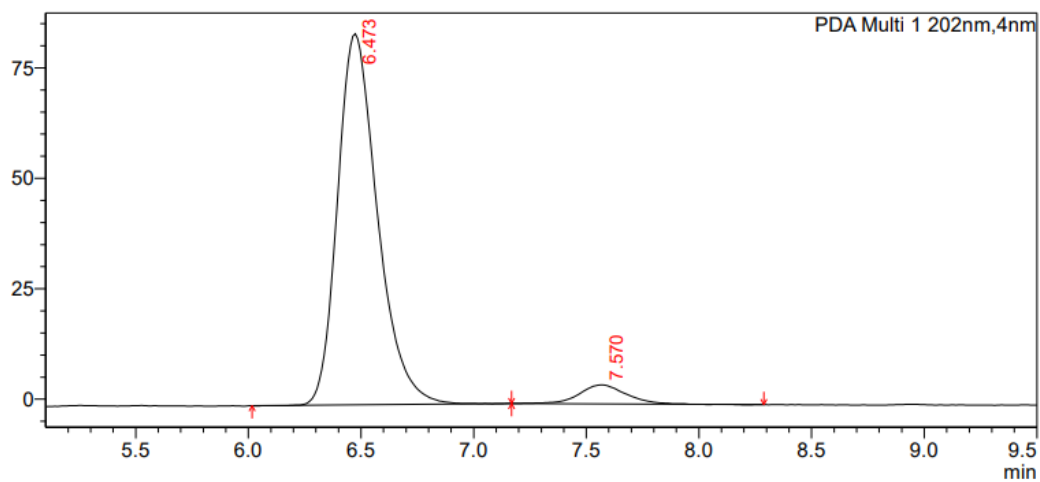

PDA Ch1 202nm

| Peak# | Ret. Time | Area    | Height | Area%   |
|-------|-----------|---------|--------|---------|
| 1     | 6.473     | 1036221 | 83990  | 94.404  |
| 2     | 7.570     | 61424   | 4280   | 5.596   |
| Total |           | 1097645 | 88270  | 100.000 |

**(S)-4-Iodobenzenesulfonamide (4j):**

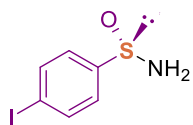

**HPLC conditions:** Chiralcel IB (*i*-PrOH/*n*-Hexane, 20:80), Flow: 1.0 mL·min<sup>-1</sup>, Temp: 25 °C.

mAU

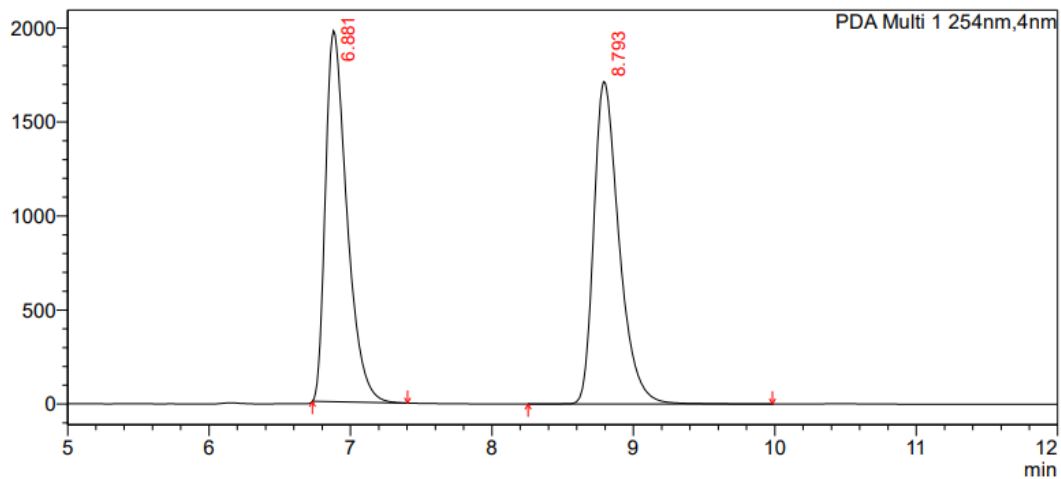

PDA Ch1 254nm

| Peak# | Ret. Time | Area     | Height  | Area%   |
|-------|-----------|----------|---------|---------|
| 1     | 6.881     | 20839838 | 1972108 | 49.397  |
| 2     | 8.793     | 21348517 | 1714357 | 50.603  |
| Total |           | 42188355 | 3686466 | 100.000 |

mAU

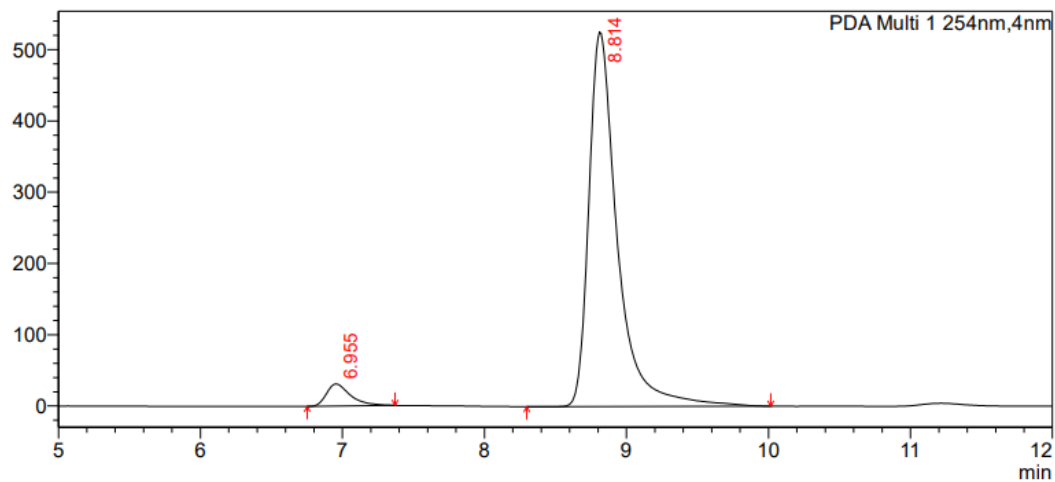

PDA Ch1 254nm

| Peak# | Ret. Time | Area    | Height | Area%   |
|-------|-----------|---------|--------|---------|
| 1     | 6.955     | 367243  | 31226  | 4.763   |
| 2     | 8.814     | 7343681 | 525255 | 95.237  |
| Total |           | 7710924 | 556481 | 100.000 |

<sup>15</sup>N-4j

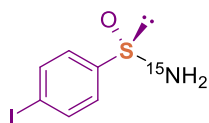

**HPLC conditions:** Chiralcel IA (*i*-PrOH/*n*-Hexane, 10:90), Flow: 1.0 mL·min<sup>-1</sup>, Temp: 25 °C.

mAU

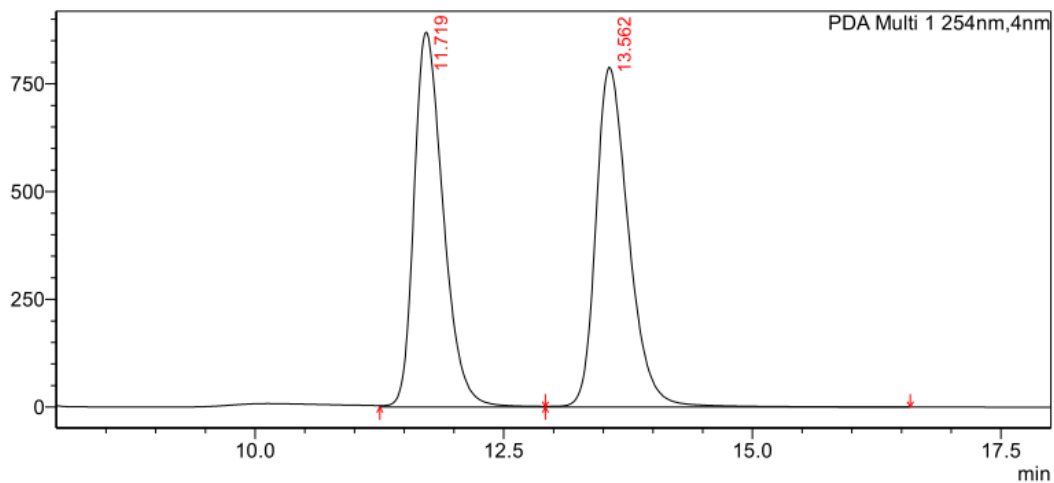

PDA Ch1 254nm

| Peak# | Ret. Time | Area     | Height  | Area%   |
|-------|-----------|----------|---------|---------|
| 1     | 11.719    | 17781273 | 869507  | 49.589  |
| 2     | 13.562    | 18076321 | 787857  | 50.411  |
| Total |           | 35857593 | 1657364 | 100.000 |

mAU

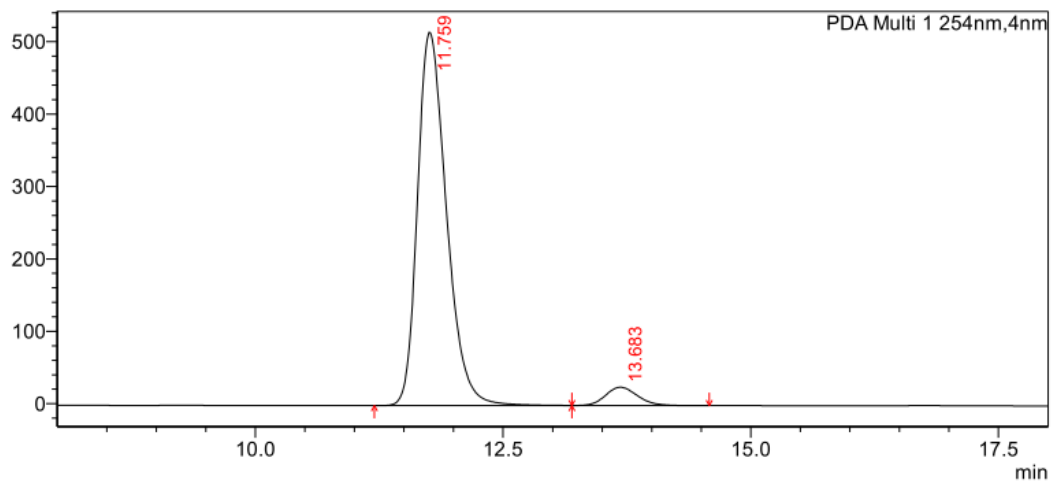

PDA Ch1 254nm

| Peak# | Ret. Time | Area     | Height | Area%   |
|-------|-----------|----------|--------|---------|
| 1     | 11.759    | 10495054 | 515554 | 94.767  |
| 2     | 13.683    | 579537   | 25515  | 5.233   |
| Total |           | 11074591 | 541068 | 100.000 |

**(S)-4-Trifluoromethylbenzenesulfonamide (4k):**

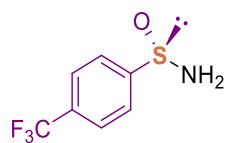

**HPLC conditions:** Chiralcel IB (*i*-PrOH/*n*-Hexane, 20:80), Flow: 1.0 mL·min<sup>-1</sup>, Temp: 25 °C.

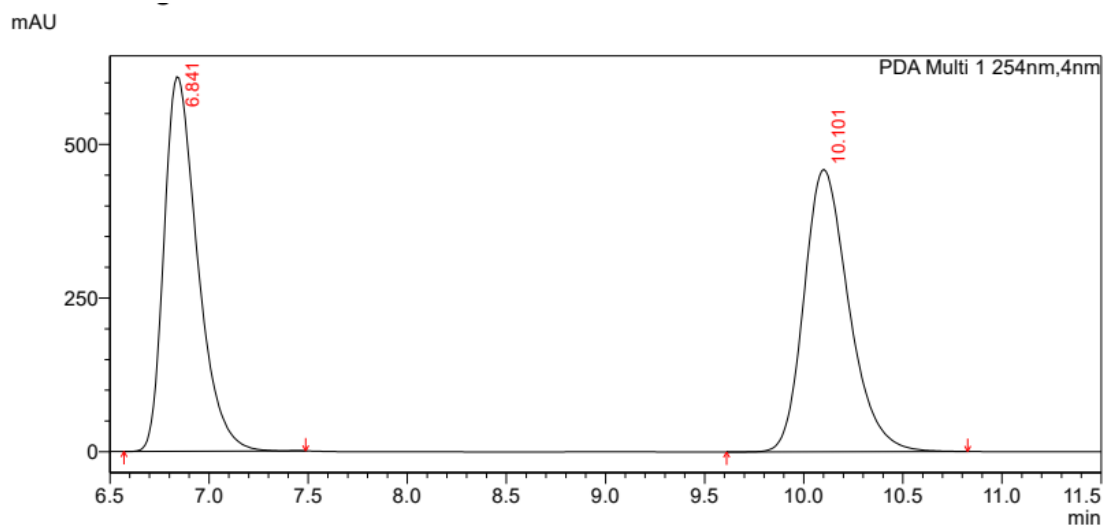

PDA Ch1 254nm

| Peak# | Ret. Time | Area     | Height  | Area%   |
|-------|-----------|----------|---------|---------|
| 1     | 6.841     | 7170943  | 609036  | 49.836  |
| 2     | 10.101    | 7218248  | 459389  | 50.164  |
| Total |           | 14389191 | 1068425 | 100.000 |

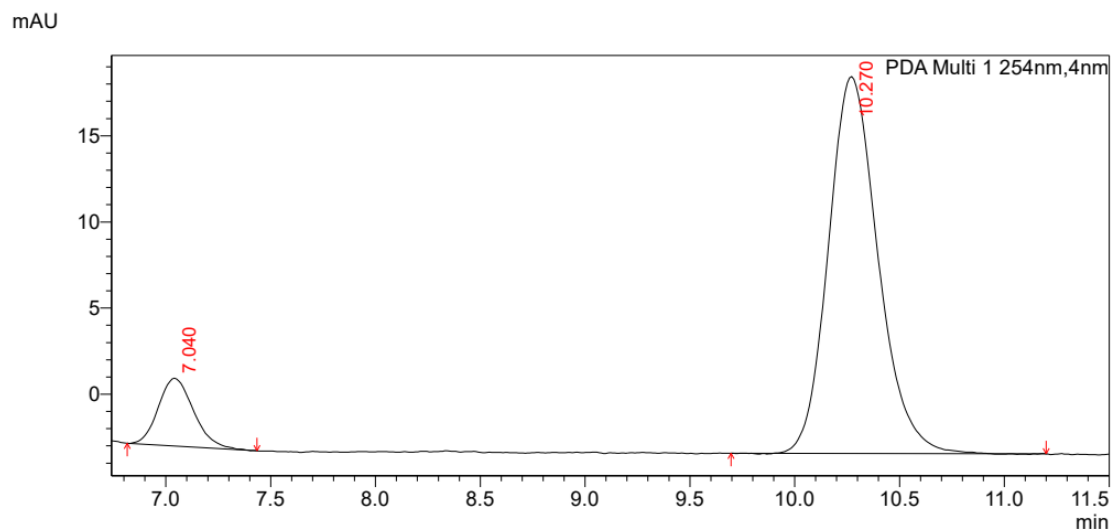

PDA Ch1 254nm

| Peak# | Ret. Time | Area   | Height | Area%   |
|-------|-----------|--------|--------|---------|
| 1     | 7.040     | 45987  | 3943   | 11.331  |
| 2     | 10.270    | 359879 | 21873  | 88.669  |
| Total |           | 405866 | 25815  | 100.000 |

**(S)-4-Methylbenzenesulfonamide (4I):**

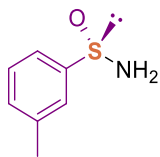

**HPLC conditions:** Chiralcel OJ-H (*i*-PrOH/*n*-Hexane, 20:80), Flow: 1.0 mL.min<sup>-1</sup>,  
Temp: 25 °C.

mAU

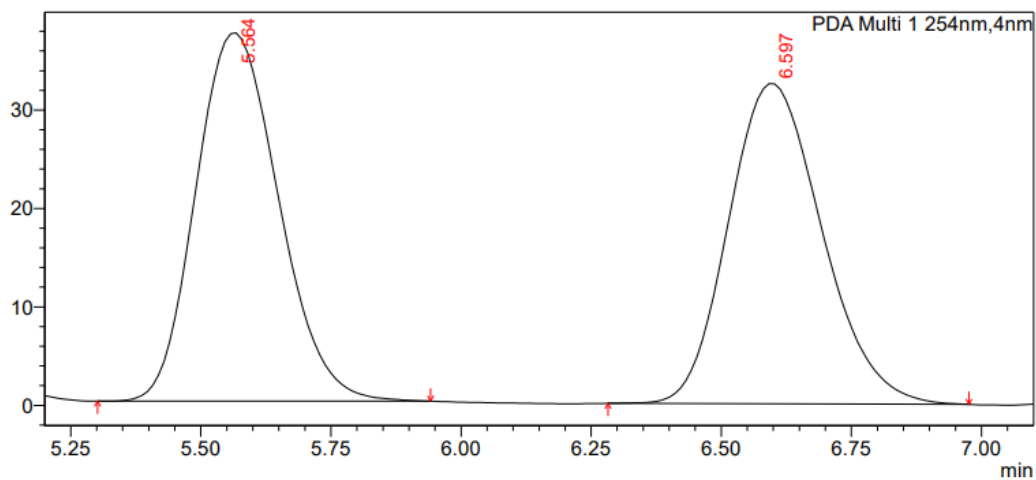

PDA Ch1 254nm

| Peak# | Ret. Time | Area   | Height | Area%   |
|-------|-----------|--------|--------|---------|
| 1     | 5.564     | 414626 | 37411  | 50.489  |
| 2     | 6.597     | 406602 | 32536  | 49.511  |
| Total |           | 821228 | 69946  | 100.000 |

mAU

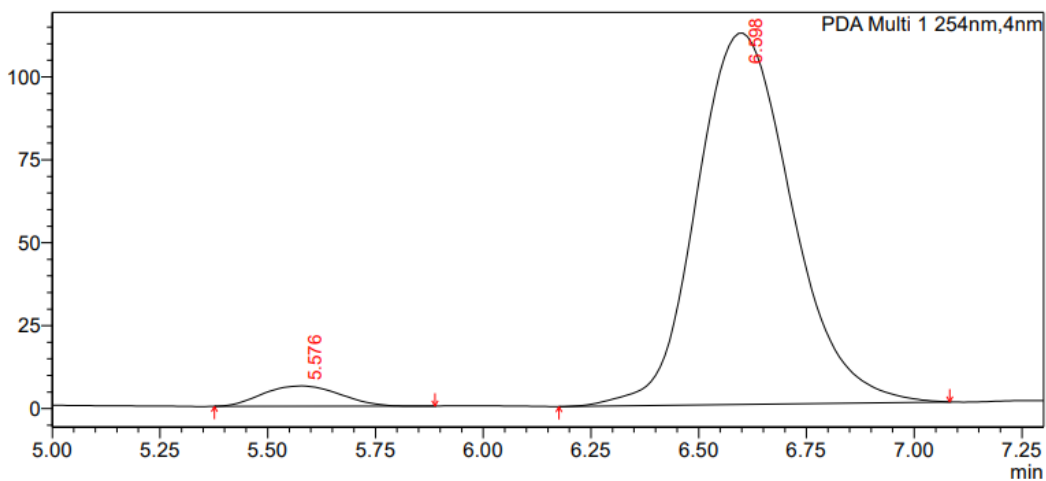

PDA Ch1 254nm

| Peak# | Ret. Time | Area    | Height | Area%   |
|-------|-----------|---------|--------|---------|
| 1     | 5.576     | 76161   | 6122   | 4.244   |
| 2     | 6.598     | 1718496 | 111889 | 95.756  |
| Total |           | 1794657 | 118011 | 100.000 |

**(S)-3-Chlorobenzenesulfonamide (4m):**

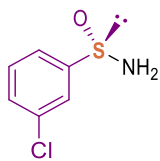

**HPLC conditions:** Chiralcel OJ-H (*i*-PrOH/*n*-Hexane, 10:90), Flow: 1.0 mL.min<sup>-1</sup>,  
Temp: 25 °C.

mAU

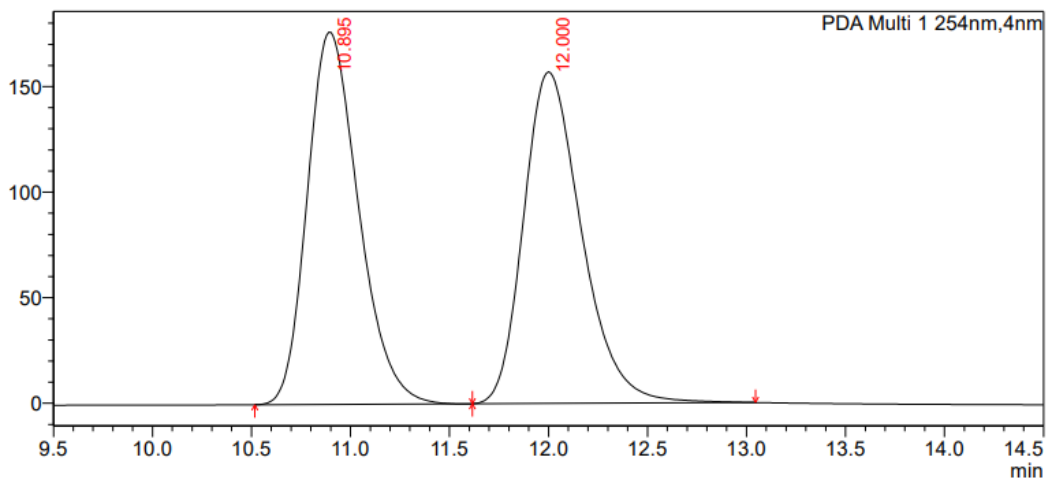

PDA Ch1 254nm

| Peak# | Ret. Time | Area    | Height | Area%   |
|-------|-----------|---------|--------|---------|
| 1     | 10.895    | 3182056 | 176268 | 49.836  |
| 2     | 12.000    | 3203063 | 157056 | 50.164  |
| Total |           | 6385119 | 333324 | 100.000 |

mAU

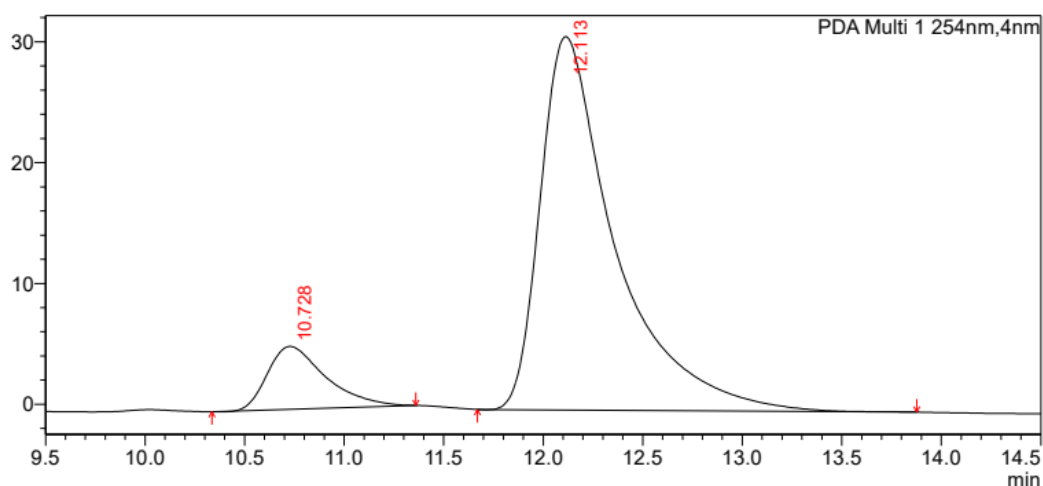

PDA Ch1 254nm

| Peak# | Ret. Time | Area   | Height | Area%   |
|-------|-----------|--------|--------|---------|
| 1     | 10.728    | 106105 | 5212   | 11.595  |
| 2     | 12.113    | 808991 | 30897  | 88.405  |
| Total |           | 915096 | 36109  | 100.000 |



**(S)-2-Methylbenzenesulfonamide (4n):**

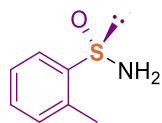

**HPLC conditions:** Chiralcel IB (*i*-PrOH/*n*-Hexane, 20:80), Flow: 1.0 mL·min<sup>-1</sup>, Temp: 25 °C.

mAU

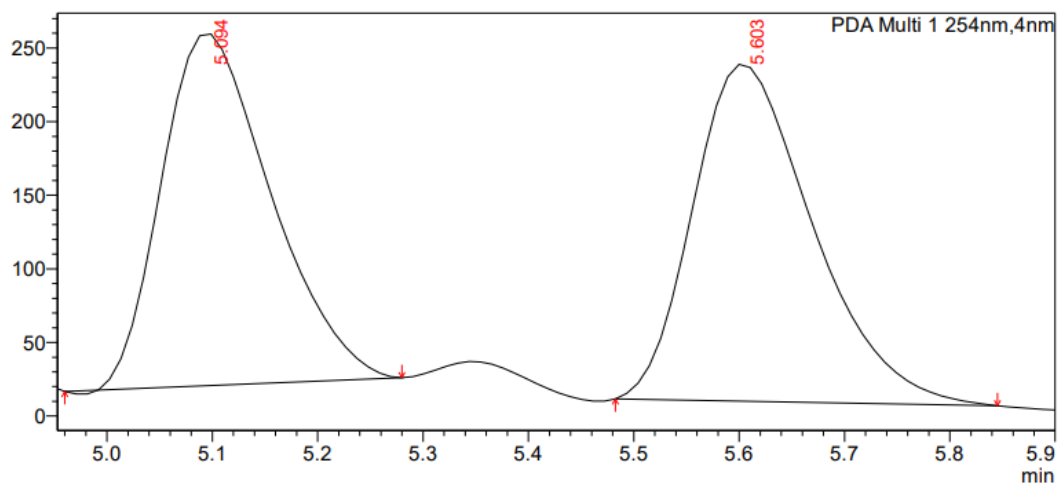

PDA Ch1 254nm

| Peak# | Ret. Time | Area    | Height | Area%   |
|-------|-----------|---------|--------|---------|
| 1     | 5.094     | 1727185 | 238773 | 48.869  |
| 2     | 5.603     | 1807100 | 228766 | 51.131  |
| Total |           | 3534285 | 467539 | 100.000 |

mAU

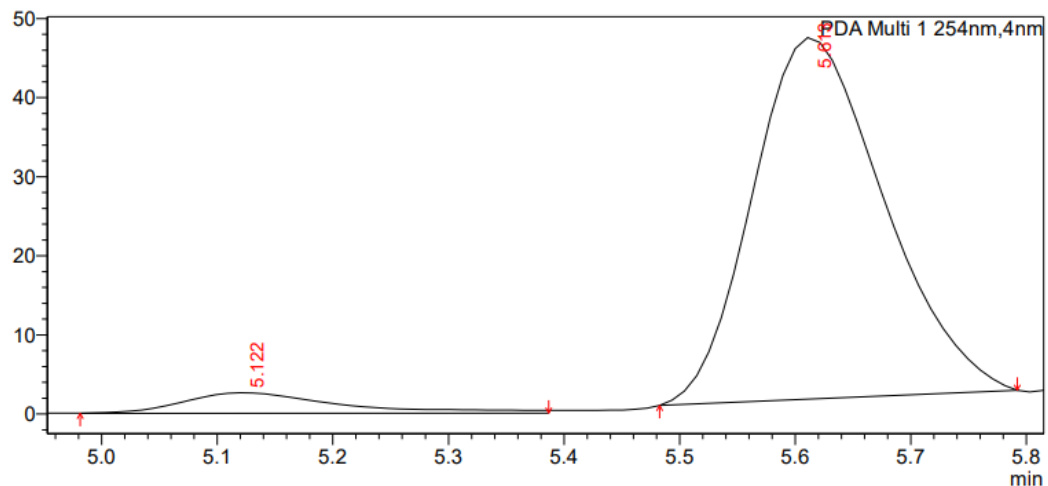

PDA Ch1 254nm

| Peak# | Ret. Time | Area   | Height | Area%   |
|-------|-----------|--------|--------|---------|
| 1     | 5.122     | 24782  | 2597   | 6.427   |
| 2     | 5.613     | 360832 | 45685  | 93.573  |
| Total |           | 385614 | 48282  | 100.000 |

**(S)-2-Methoxybenzenesulfonamide (4o):**

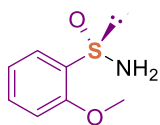

**HPLC conditions:** Chiralcel IB (*i*-PrOH/*n*-Hexane, 20:80), Flow: 1.0 mL·min<sup>-1</sup>, Temp: 25 °C.

mAU

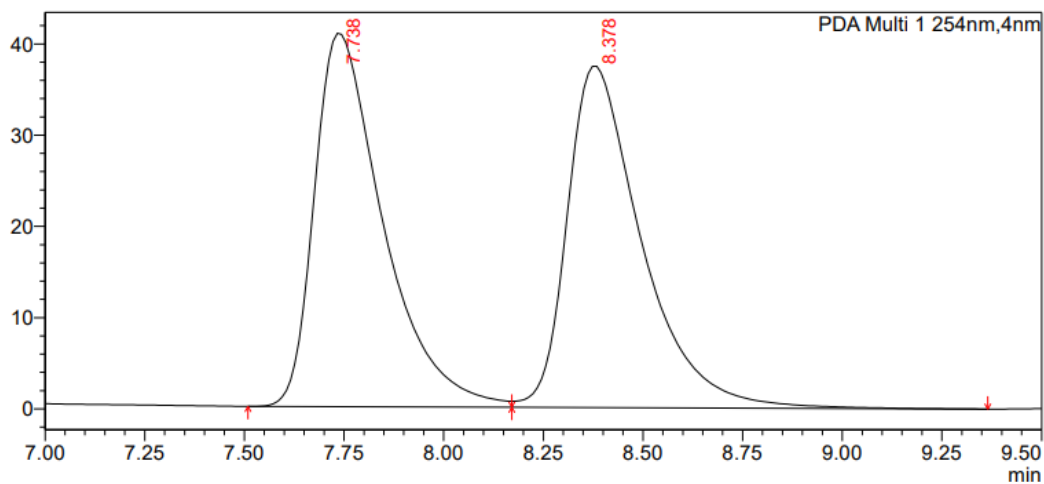

PDA Ch1 254nm

| Peak# | Ret. Time | Area   | Height | Area%   |
|-------|-----------|--------|--------|---------|
| 1     | 7.738     | 491418 | 40923  | 50.233  |
| 2     | 8.378     | 486858 | 37418  | 49.767  |
| Total |           | 978276 | 78341  | 100.000 |

mAU

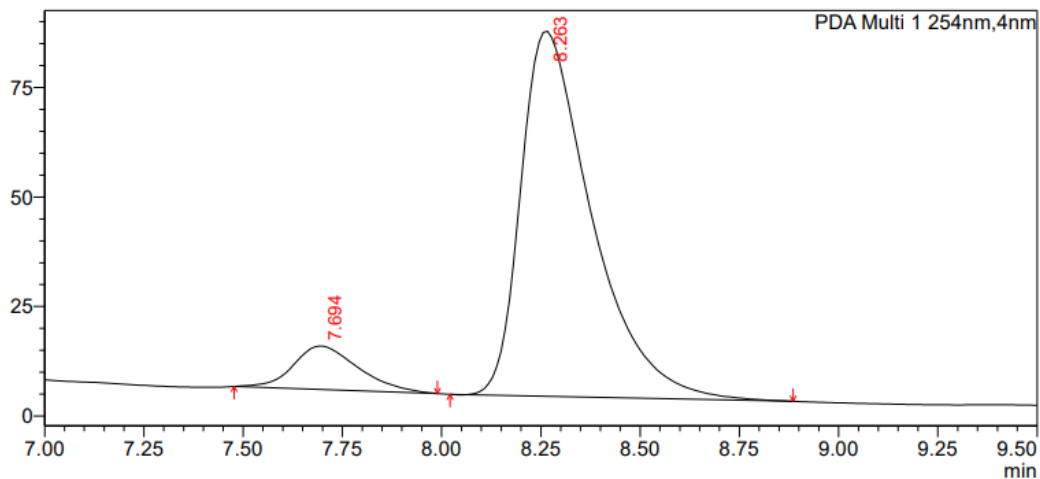

PDA Ch1 254nm

| Peak# | Ret. Time | Area    | Height | Area%   |
|-------|-----------|---------|--------|---------|
| 1     | 7.694     | 112545  | 9896   | 9.768   |
| 2     | 8.263     | 1039614 | 83270  | 90.232  |
| Total |           | 1152159 | 93166  | 100.000 |

**(S)-2-Fluorobenzenesulfonamide(4p):**

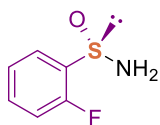

**HPLC conditions:** Chiralcel OJ-H (*i*-PrOH/*n*-Hexane, 10:90), Flow: 1.0 mL.min<sup>-1</sup>,  
Temp: 25 °C.

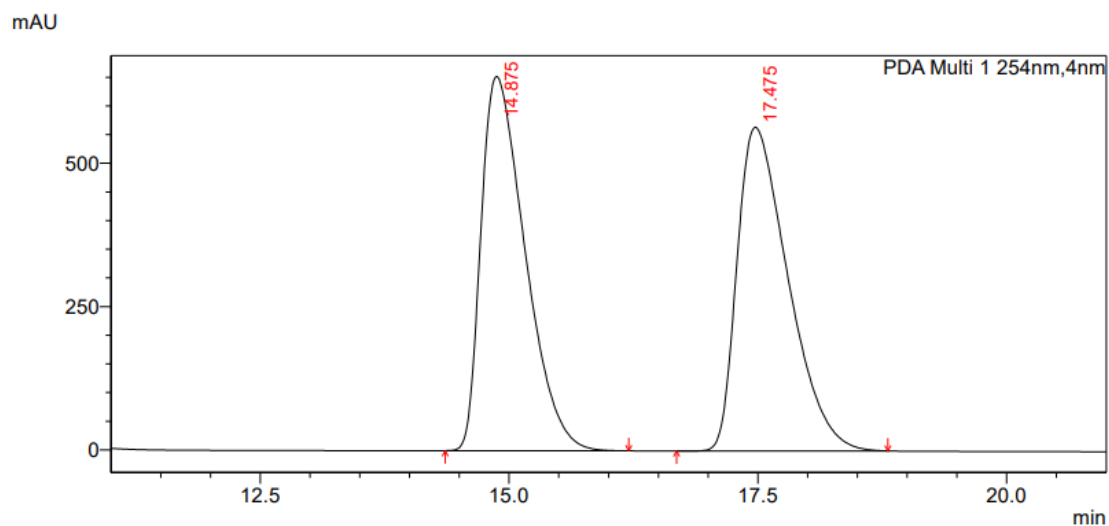

PDA Ch1 254nm

| Peak# | Ret. Time | Area     | Height  | Area%   |
|-------|-----------|----------|---------|---------|
| 1     | 14.875    | 20102077 | 652522  | 49.976  |
| 2     | 17.475    | 20121058 | 564631  | 50.024  |
| Total |           | 40223136 | 1217152 | 100.000 |

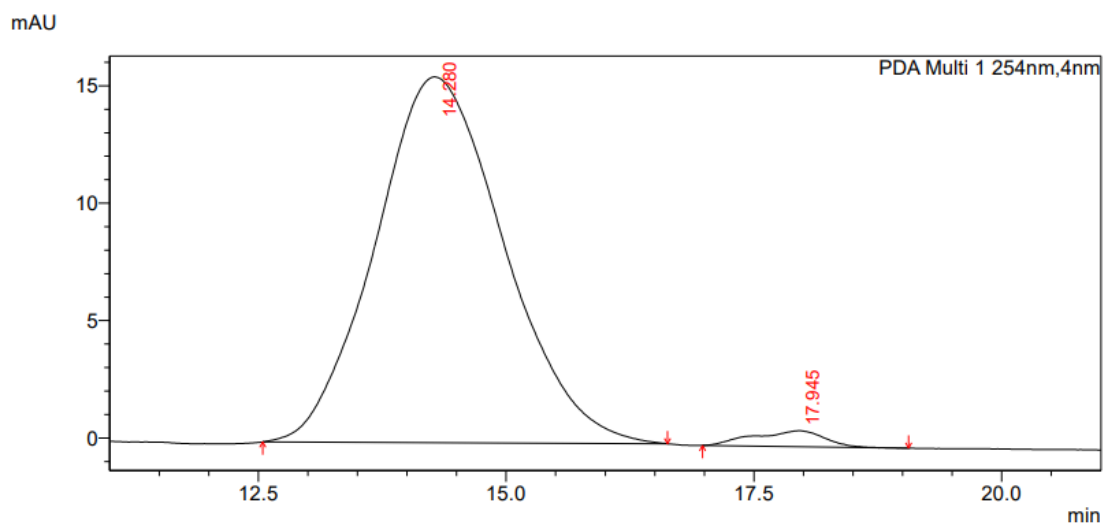

PDA Ch1 254nm

| Peak# | Ret. Time | Area    | Height | Area%   |
|-------|-----------|---------|--------|---------|
| 1     | 14.280    | 1404473 | 15577  | 97.623  |
| 2     | 17.945    | 34190   | 684    | 2.377   |
| Total |           | 1438663 | 16262  | 100.000 |

**(S)-2,5-Dimethoxybenzenesulfonamide (4q):**

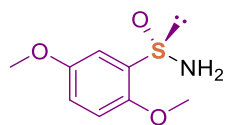

**HPLC conditions:** Chiralcel IB (*i*-PrOH/*n*-Hexane, 10:90), Flow: 1.0 mL.min<sup>-1</sup>, Temp: 25 °C.

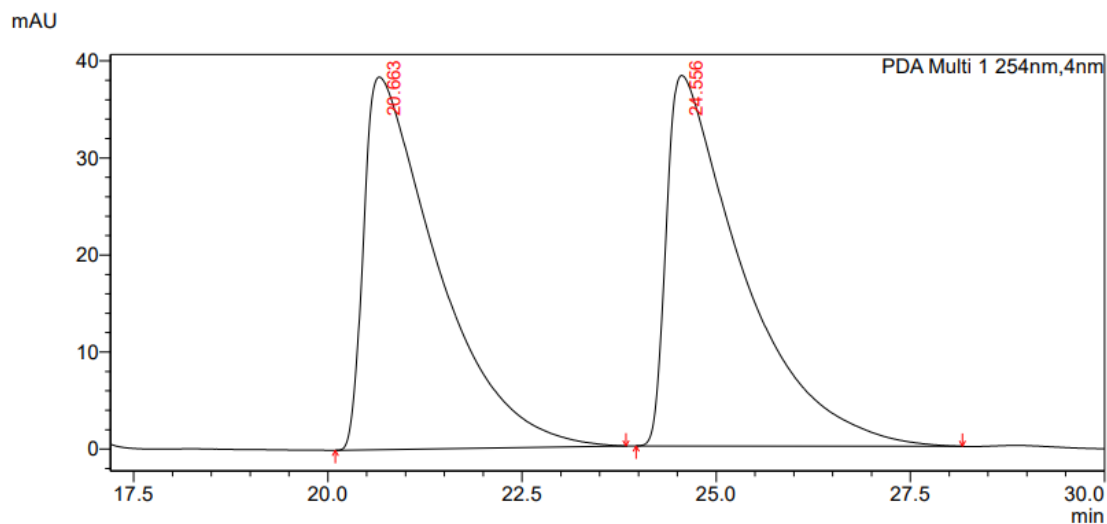

PDA Ch1 254nm

| Peak# | Ret. Time | Area    | Height | Area%   |
|-------|-----------|---------|--------|---------|
| 1     | 20.663    | 2533099 | 38379  | 49.394  |
| 2     | 24.556    | 2595281 | 38179  | 50.606  |
| Total |           | 5128380 | 76558  | 100.000 |

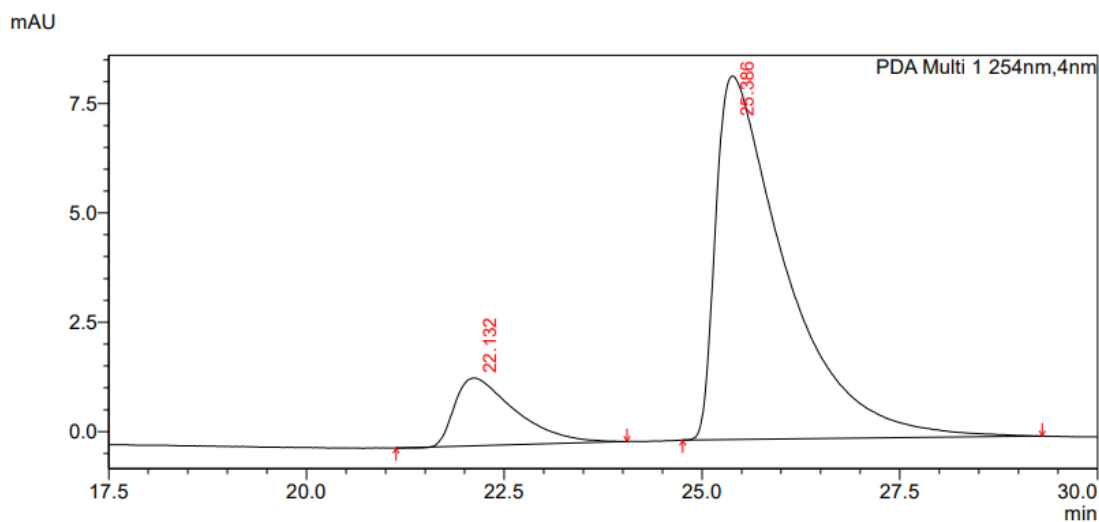

PDA Ch1 254nm

| Peak# | Ret. Time | Area   | Height | Area%   |
|-------|-----------|--------|--------|---------|
| 1     | 22.132    | 82172  | 1550   | 13.819  |
| 2     | 25.386    | 512451 | 8311   | 86.181  |
| Total |           | 594623 | 9862   | 100.000 |

**(S)-2,4,6-Trimethylbenzenesulfinamide (4r):**

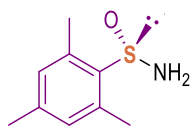

**HPLC conditions:** Chiralcel OJ-H (*i*-PrOH/*n*-Hexane, 30:70), Flow: 1.0 mL.min<sup>-1</sup>,  
Temp: 25 °C.

mAU

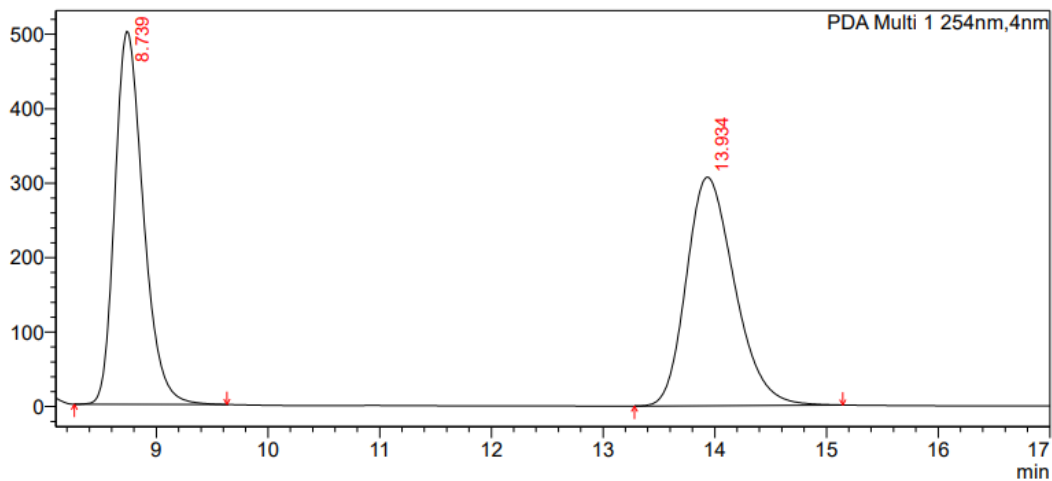

PDA Ch1 254nm

| Peak# | Ret. Time | Area     | Height | Area%   |
|-------|-----------|----------|--------|---------|
| 1     | 8.739     | 8897462  | 500780 | 49.104  |
| 2     | 13.934    | 9222000  | 306870 | 50.896  |
| Total |           | 18119462 | 807650 | 100.000 |

mAU

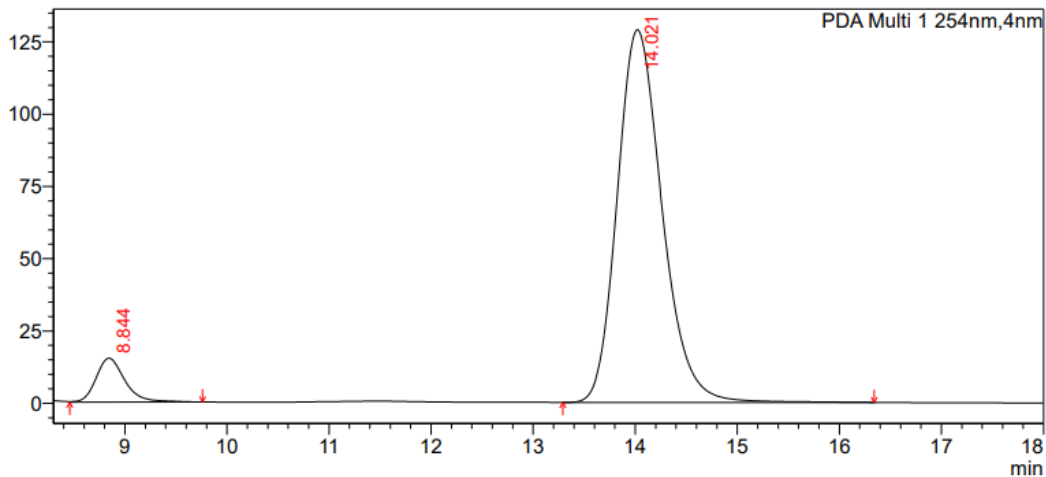

PDA Ch1 254nm

| Peak# | Ret. Time | Area    | Height | Area%   |
|-------|-----------|---------|--------|---------|
| 1     | 8.844     | 297047  | 15198  | 7.014   |
| 2     | 14.021    | 3938098 | 128900 | 92.986  |
| Total |           | 4235145 | 144098 | 100.000 |

**(S)-Naphthalene-2-sulfinamide(4s):**

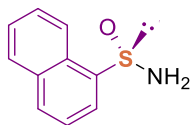

**HPLC conditions:** Chiralcel IB (*i*-PrOH/*n*-Hexane, 10:90), Flow: 1.0 mL·min<sup>-1</sup>, Temp: 25 °C.

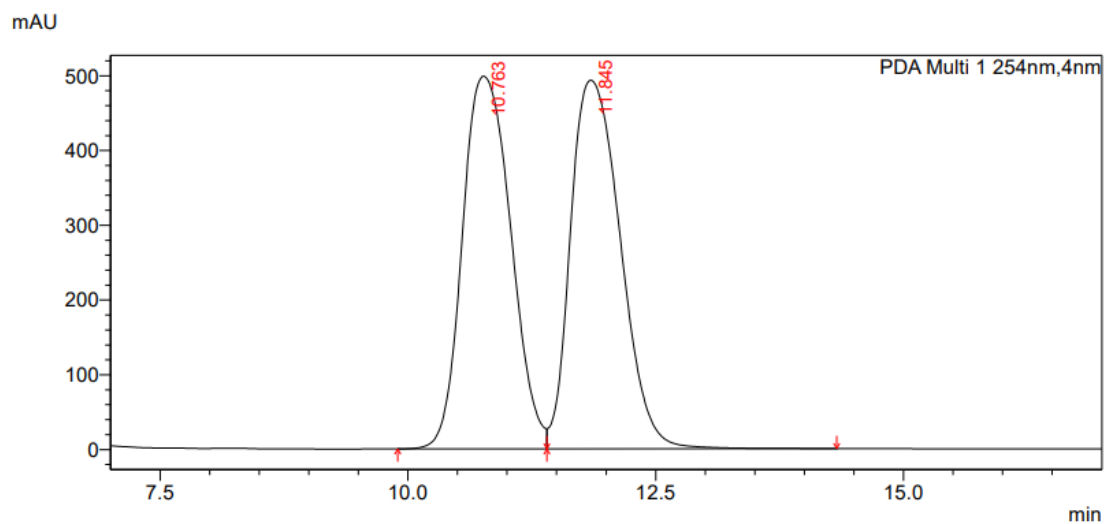

PDA Ch1 254nm

| Peak# | Ret. Time | Area     | Height | Area%   |
|-------|-----------|----------|--------|---------|
| 1     | 10.763    | 16940831 | 498490 | 49.553  |
| 2     | 11.845    | 17246618 | 493110 | 50.447  |
| Total |           | 34187449 | 991600 | 100.000 |

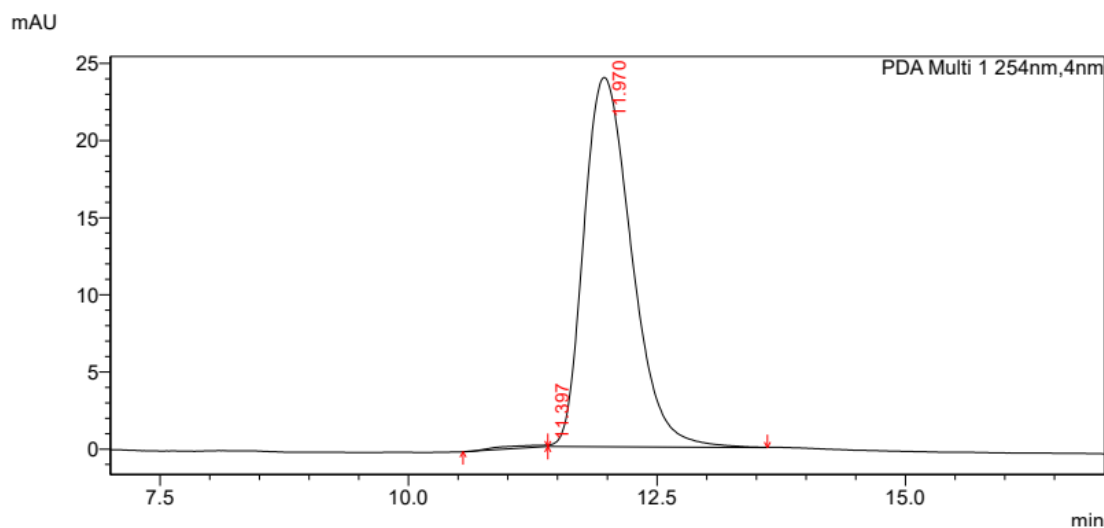

PDA Ch1 254nm

| Peak# | Ret. Time | Area   | Height | Area%   |
|-------|-----------|--------|--------|---------|
| 1     | 11.397    | 5619   | 99     | 0.699   |
| 2     | 11.970    | 798754 | 23940  | 99.301  |
| Total |           | 804373 | 24039  | 100.000 |

**(S)-Naphthalene-2-sulfonamide(4t):**

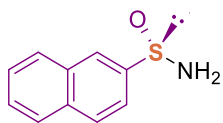

**HPLC conditions:** Chiralcel IB (*i*-PrOH/*n*-Hexane, 10:90), Flow: 1.0 mL.min<sup>-1</sup>, Temp: 25 °C.

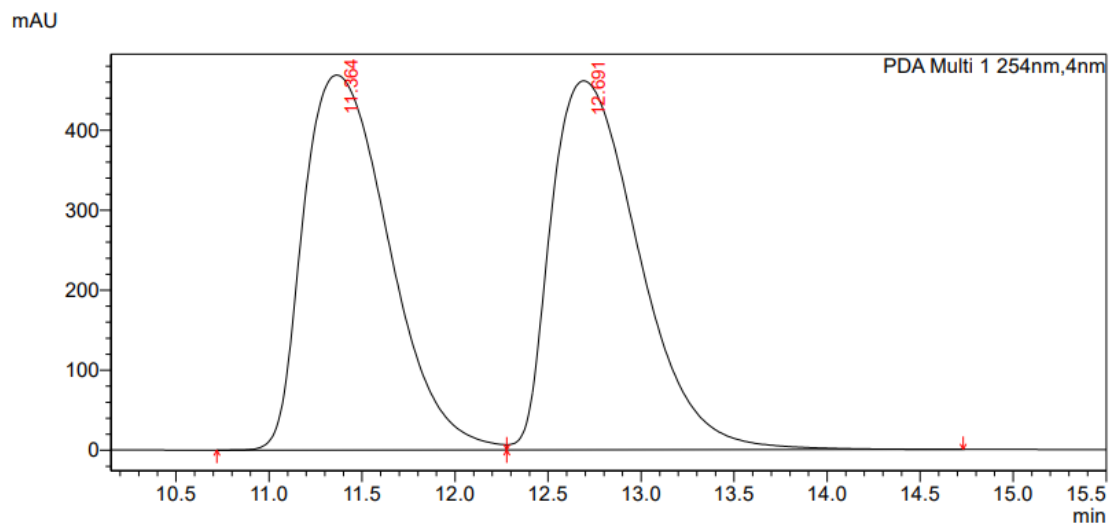

| PDA Ch1 254nm |           |          |        |         |
|---------------|-----------|----------|--------|---------|
| Peak#         | Ret. Time | Area     | Height | Area%   |
| 1             | 11.364    | 14975772 | 468412 | 49.682  |
| 2             | 12.691    | 15167673 | 460994 | 50.318  |
| Total         |           | 30143446 | 929406 | 100.000 |

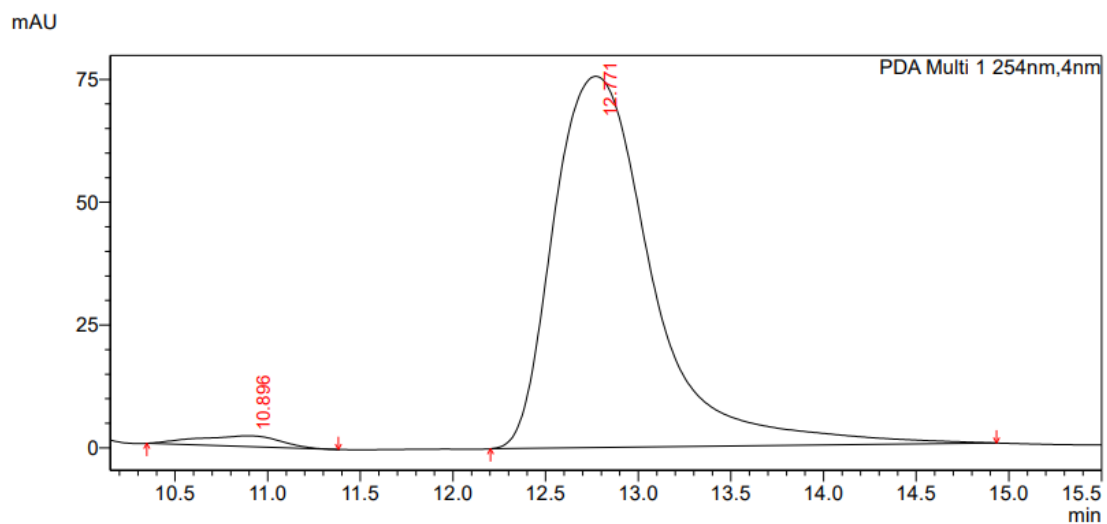

| PDA Ch1 254nm |           |         |        |         |
|---------------|-----------|---------|--------|---------|
| Peak#         | Ret. Time | Area    | Height | Area%   |
| 1             | 10.896    | 66687   | 2210   | 2.321   |
| 2             | 12.771    | 2806312 | 75561  | 97.679  |
| Total         |           | 2872999 | 77771  | 100.000 |

<sup>15</sup>N-4t

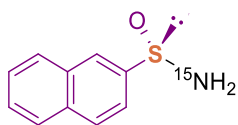

**HPLC conditions:** Chiralcel IA (*i*-PrOH/*n*-Hexane, 10:90), Flow: 1.0 mL·min<sup>-1</sup>, Temp: 25 °C.

mAU

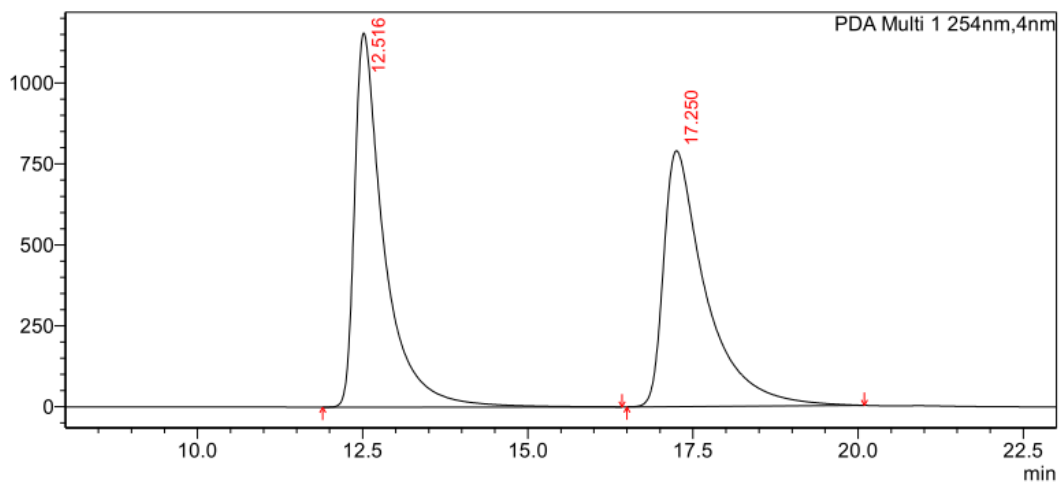

PDA Ch1 254nm

| Peak# | Ret. Time | Area     | Height  | Area%   |
|-------|-----------|----------|---------|---------|
| 1     | 12.516    | 35981733 | 1155115 | 50.636  |
| 2     | 17.250    | 35077720 | 790021  | 49.364  |
| Total |           | 71059453 | 1945137 | 100.000 |

mAU

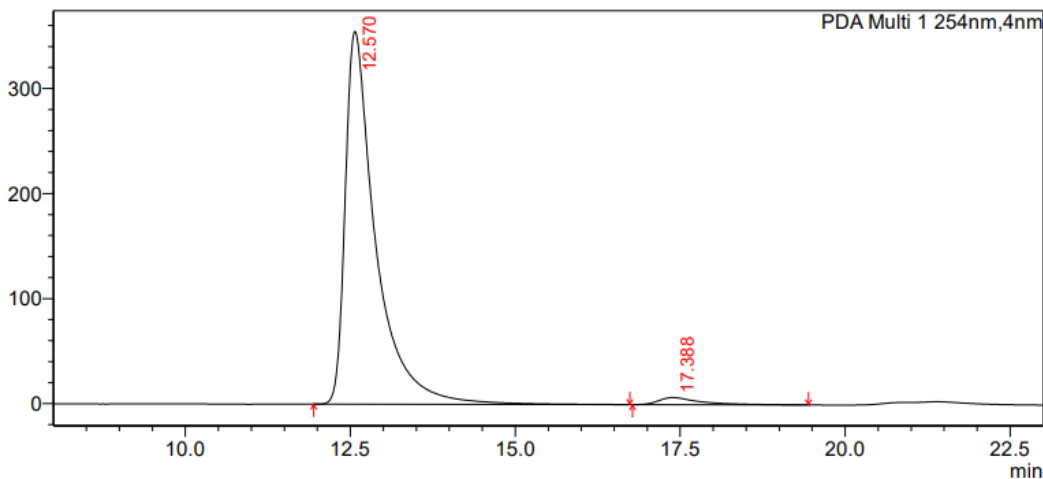

PDA Ch1 254nm

| Peak# | Ret. Time | Area     | Height | Area%   |
|-------|-----------|----------|--------|---------|
| 1     | 12.570    | 11414806 | 354696 | 97.483  |
| 2     | 17.388    | 294699   | 6764   | 2.517   |
| Total |           | 11709505 | 361460 | 100.000 |



**(S)-2,3-Dihydrobenzofuran-5-sulfonamide (4u):**



**HPLC conditions:** Chiralcel IA (*i*-PrOH/*n*-Hexane, 10:90), Flow: 1.0 mL·min<sup>-1</sup>, Temp: 25 °C.

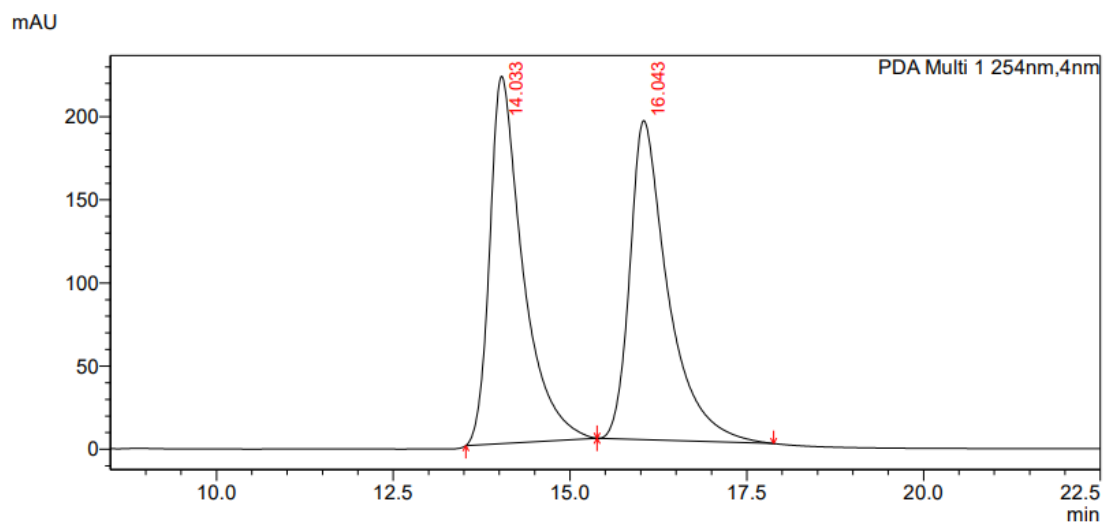

| Peak# | Ret. Time | Area     | Height | Area%   |
|-------|-----------|----------|--------|---------|
| 1     | 14.033    | 7215399  | 220920 | 50.019  |
| 2     | 16.043    | 7209878  | 191890 | 49.981  |
| Total |           | 14425278 | 412809 | 100.000 |

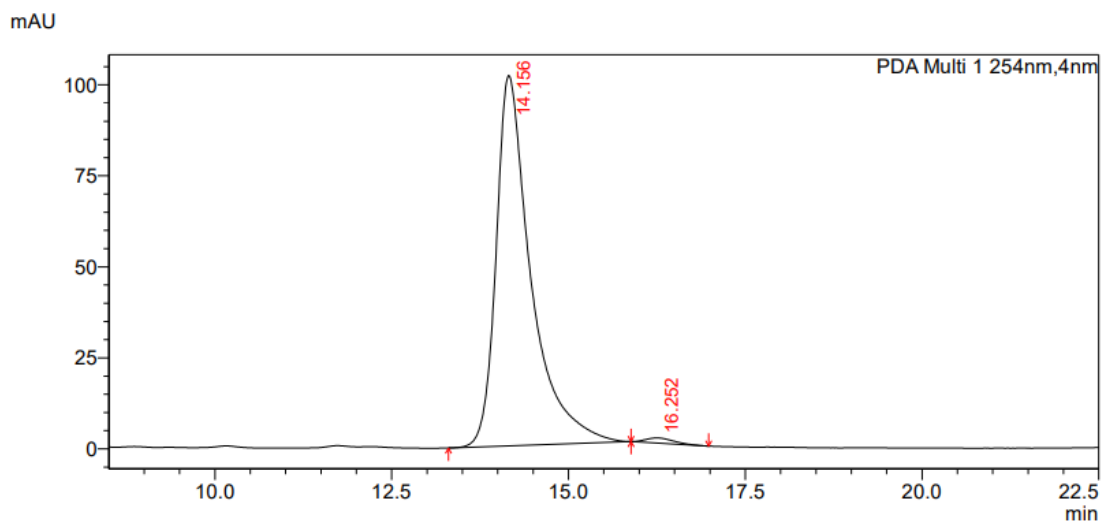

| Peak# | Ret. Time | Area    | Height | Area%   |
|-------|-----------|---------|--------|---------|
| 1     | 14.156    | 3486754 | 101712 | 98.880  |
| 2     | 16.252    | 39500   | 1432   | 1.120   |
| Total |           | 3526254 | 103145 | 100.000 |

**(S)-2-Thienesulfonamide (4v):**

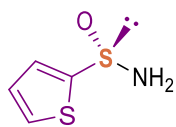

**HPLC conditions:** Chiralcel IB (*i*-PrOH/*n*-Hexane, 10:90), Flow: 1.0 mL·min<sup>-1</sup>, Temp: 25 °C.

mAU

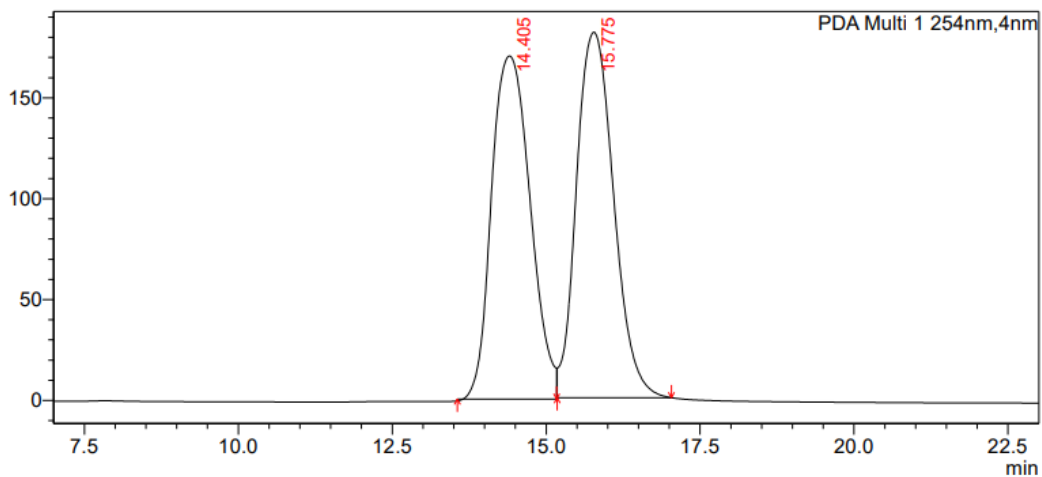

PDA Ch1 254nm

| Peak# | Ret. Time | Area     | Height | Area%   |
|-------|-----------|----------|--------|---------|
| 1     | 14.405    | 7435829  | 170106 | 49.354  |
| 2     | 15.775    | 7630412  | 181208 | 50.646  |
| Total |           | 15066241 | 351313 | 100.000 |

mAU

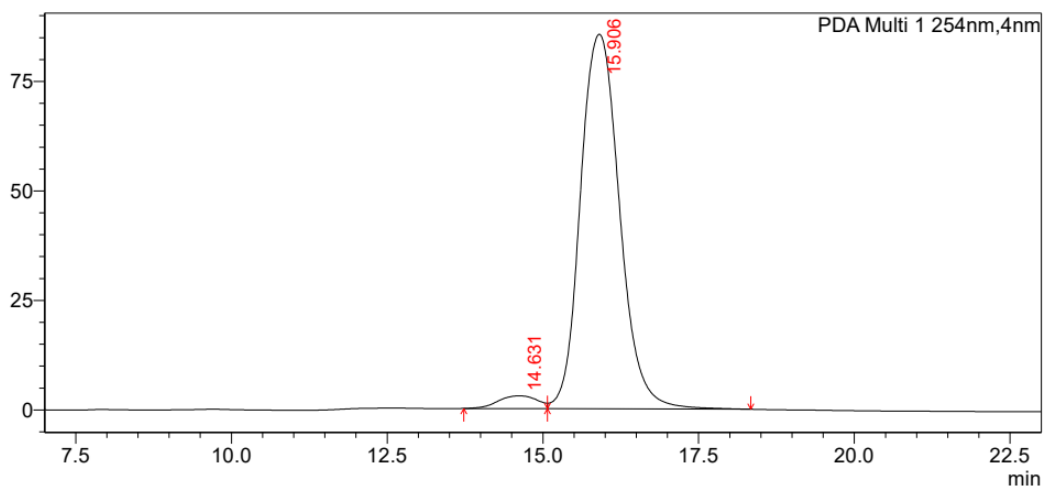

PDA Ch1 254nm

| Peak# | Ret. Time | Area    | Height | Area%   |
|-------|-----------|---------|--------|---------|
| 1     | 14.631    | 129840  | 2923   | 3.353   |
| 2     | 15.906    | 3743076 | 85499  | 96.647  |
| Total |           | 3872915 | 88422  | 100.000 |

**(S)-5-Methylthiophene sulfonamide (4w):**

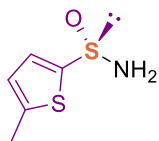

**HPLC conditions:** Chiralcel IA (*i*-PrOH/*n*-Hexane, 10:90), Flow: 1.0 mL·min<sup>-1</sup>, Temp: 25 °C.

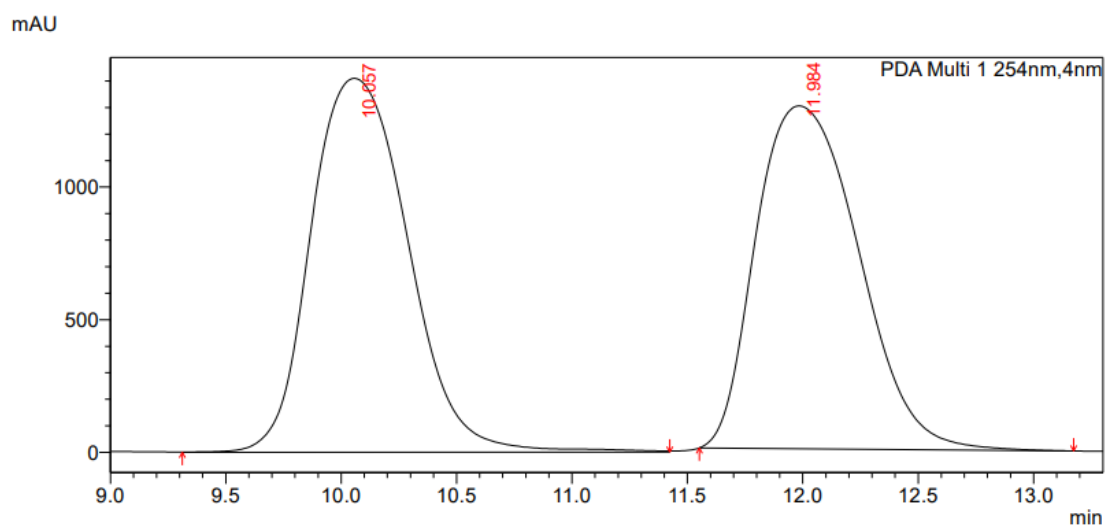

| PDA Ch1 254nm |           |          |         |         |
|---------------|-----------|----------|---------|---------|
| Peak#         | Ret. Time | Area     | Height  | Area%   |
| 1             | 10.057    | 41374782 | 1409425 | 50.755  |
| 2             | 11.984    | 40143268 | 1292476 | 49.245  |
| Total         |           | 81518050 | 2701901 | 100.000 |

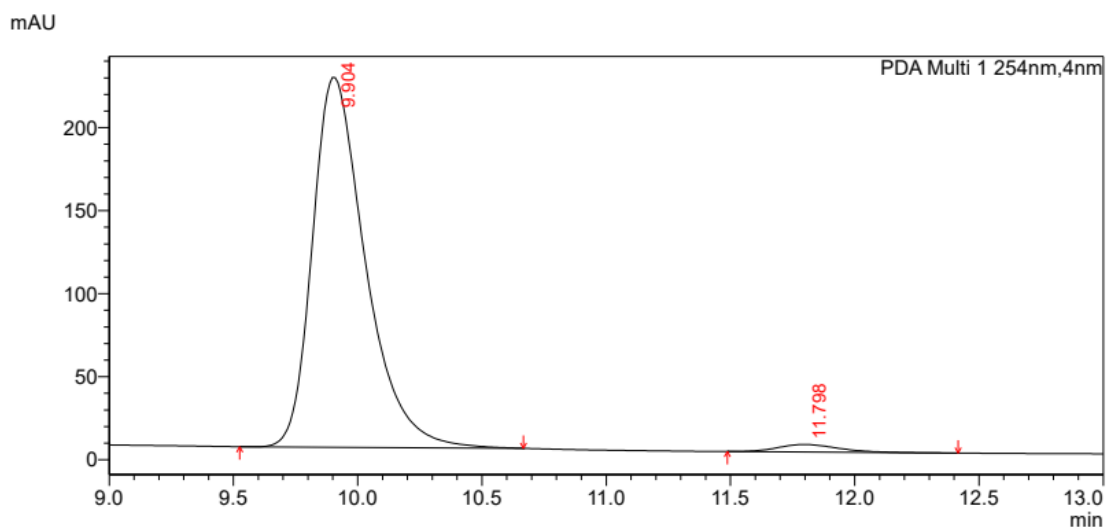

| PDA Ch1 254nm |           |         |        |         |
|---------------|-----------|---------|--------|---------|
| Peak#         | Ret. Time | Area    | Height | Area%   |
| 1             | 9.904     | 3311790 | 222678 | 97.703  |
| 2             | 11.798    | 77857   | 4577   | 2.297   |
| Total         |           | 3389648 | 227254 | 100.000 |

**(S)-Cyclohexylsulfonamide (4x):**

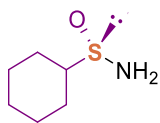

**HPLC conditions:** Chiralcel IA (*i*-PrOH/*n*-Hexane, 5:95), Flow: 1.0 mL.min<sup>-1</sup>, Temp: 25 °C.

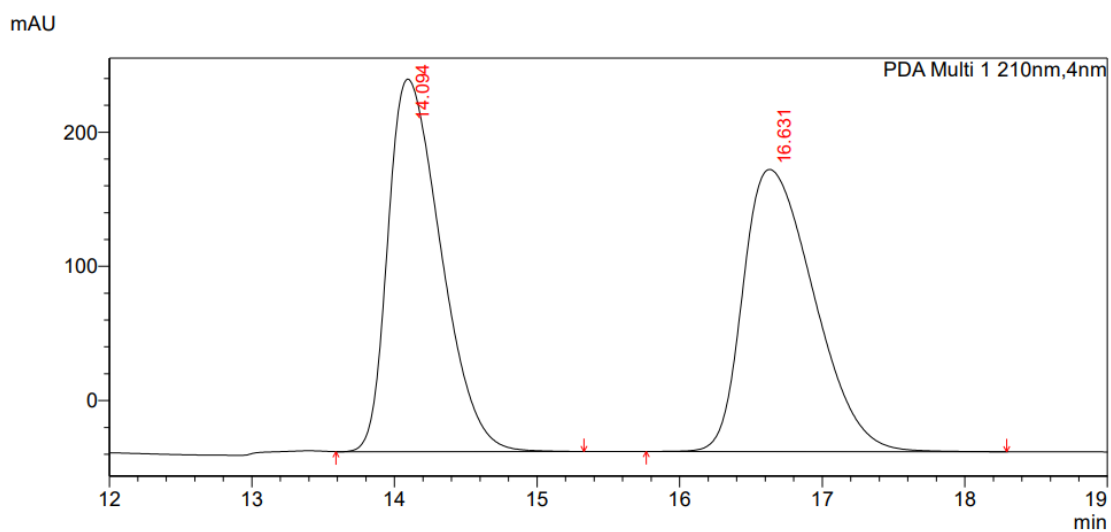

| Peak# | Ret. Time | Area     | Height | Area%   |
|-------|-----------|----------|--------|---------|
| 1     | 14.094    | 7170031  | 277608 | 49.664  |
| 2     | 16.631    | 7267116  | 210333 | 50.336  |
| Total |           | 14437147 | 487940 | 100.000 |

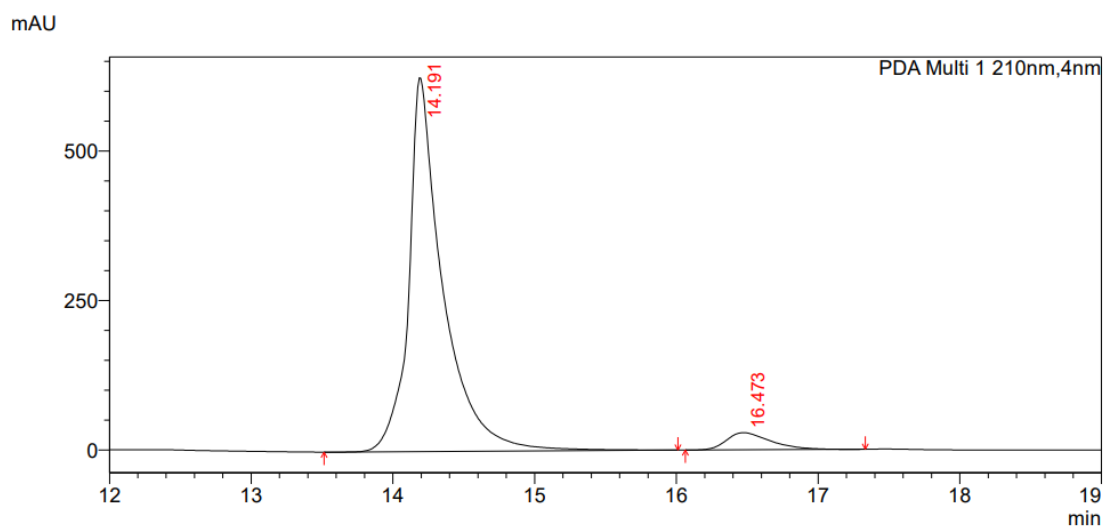

| Peak# | Ret. Time | Area     | Height | Area%   |
|-------|-----------|----------|--------|---------|
| 1     | 14.191    | 10493212 | 624792 | 94.442  |
| 2     | 16.473    | 617533   | 28603  | 5.558   |
| Total |           | 11110744 | 653396 | 100.000 |

**(S)-2-Phenyl-ethanesulfonamide (4y):**

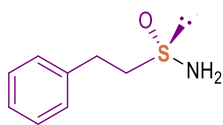

**HPLC conditions:** Chiralcel IB (*i*-PrOH/*n*-Hexane, 20:80), Flow: 1.0 mL·min<sup>-1</sup>, Temp: 25 °C.

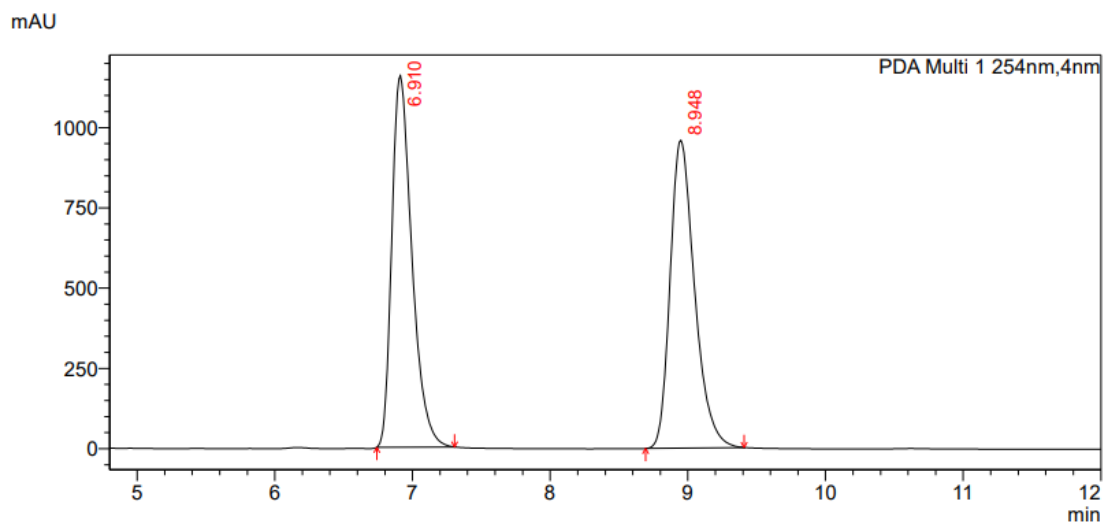

| Peak# | Ret. Time | Area     | Height  | Area%   |
|-------|-----------|----------|---------|---------|
| 1     | 6.910     | 11744455 | 1156654 | 49.804  |
| 2     | 8.948     | 11837022 | 959246  | 50.196  |
| Total |           | 23581477 | 2115899 | 100.000 |

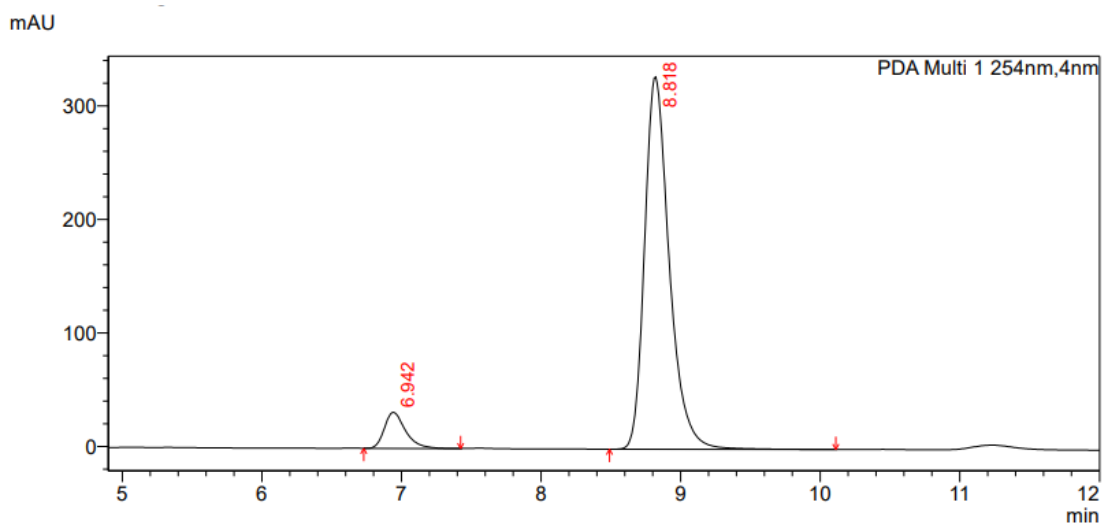

| Peak# | Ret. Time | Area    | Height | Area%   |
|-------|-----------|---------|--------|---------|
| 1     | 6.942     | 335390  | 31803  | 7.668   |
| 2     | 8.818     | 4038663 | 327986 | 92.332  |
| Total |           | 4374053 | 359789 | 100.000 |

**(S)-4-(5-Methyl-3-phenylisoxazol-4-yl) benzenesulfonamide (5a):**

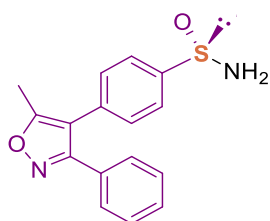

**HPLC conditions:** Chiralcel IA (*i*-PrOH/*n*-Hexane, 10:90), Flow: 1.0 mL.min<sup>-1</sup>, Temp: 25 °C.

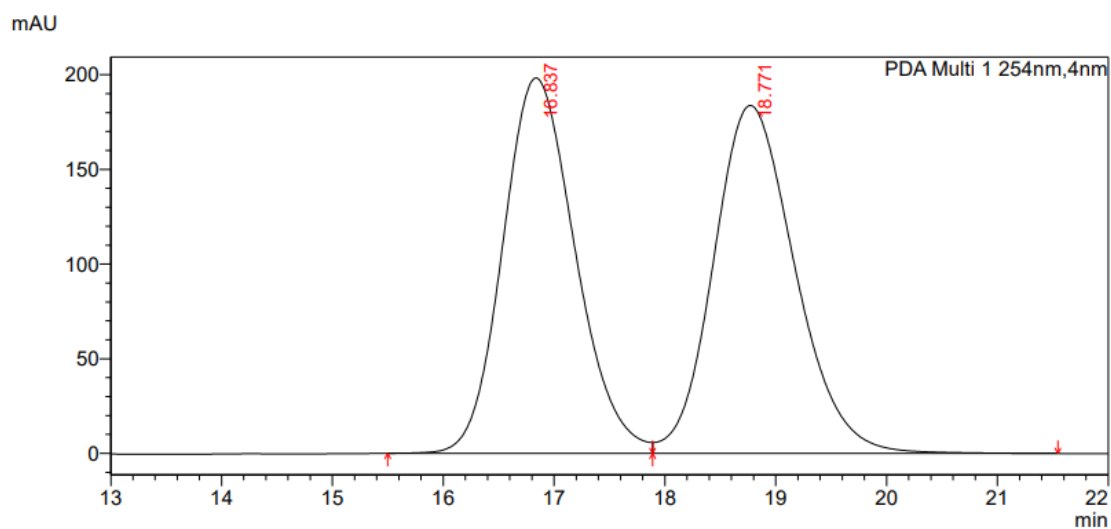

| PDA Ch1 254nm |           |          |        |         |
|---------------|-----------|----------|--------|---------|
| Peak#         | Ret. Time | Area     | Height | Area%   |
| 1             | 16.837    | 9021238  | 198232 | 48.984  |
| 2             | 18.771    | 9395613  | 183769 | 51.016  |
| Total         |           | 18416850 | 382001 | 100.000 |

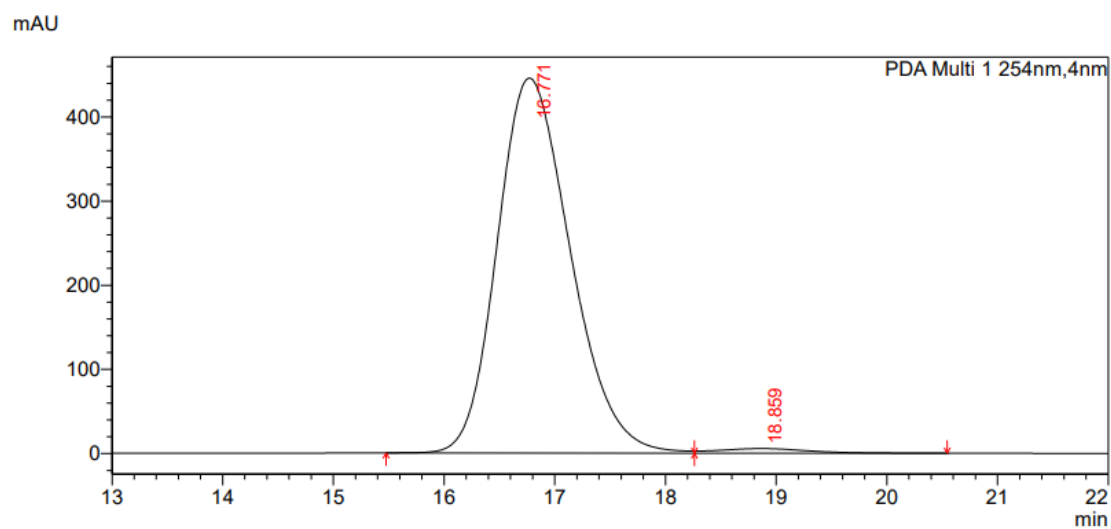

| PDA Ch1 254nm |           |          |        |         |
|---------------|-----------|----------|--------|---------|
| Peak#         | Ret. Time | Area     | Height | Area%   |
| 1             | 16.771    | 20490928 | 445556 | 98.567  |
| 2             | 18.859    | 297881   | 5402   | 1.433   |
| Total         |           | 20788810 | 450958 | 100.000 |

**(S)- 4-(5-(p-tolyl)-3-(trifluoromethyl)-1H-pyrazol-1-yl)benzenesulfonamide (5b):**

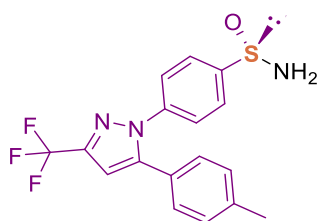

**HPLC conditions:** Chiralcel IA (*i*-PrOH/*n*-Hexane, 10:90), Flow: 1.0 mL.min<sup>-1</sup>, Temp: 25 °C.

mAU

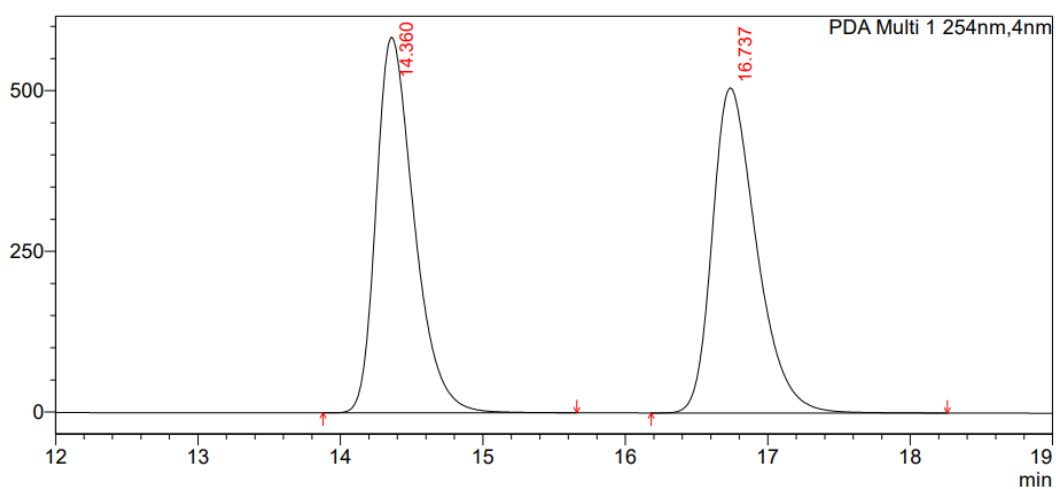

PDA Ch1 254nm

| Peak# | Ret. Time | Area     | Height  | Area%   |
|-------|-----------|----------|---------|---------|
| 1     | 14.360    | 10858888 | 584499  | 49.862  |
| 2     | 16.737    | 10918958 | 505790  | 50.138  |
| Total |           | 21777846 | 1090288 | 100.000 |

mAU

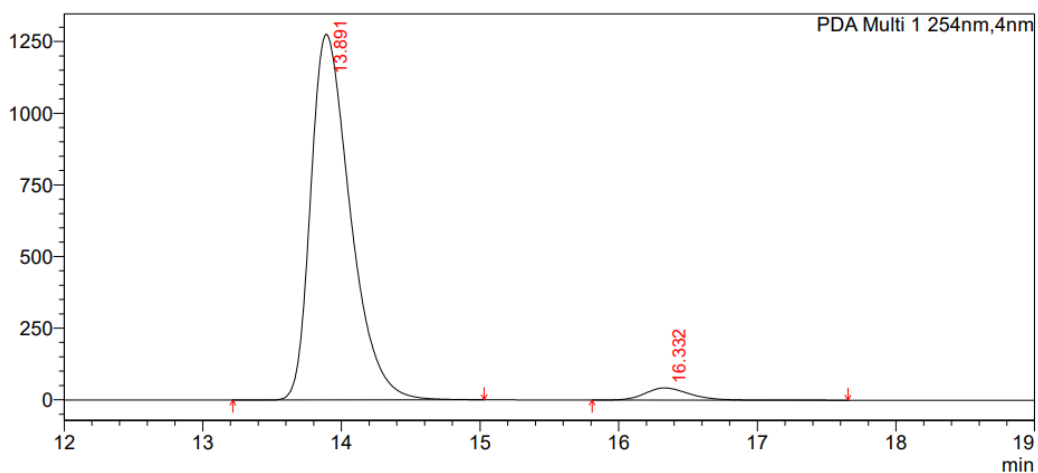

PDA Ch1 254nm

| Peak# | Ret. Time | Area     | Height  | Area%   |
|-------|-----------|----------|---------|---------|
| 1     | 13.891    | 25263400 | 1276073 | 96.330  |
| 2     | 16.332    | 962527   | 42866   | 3.670   |
| Total |           | 26225927 | 1318939 | 100.000 |

**(S)-4-(3-(Difluoromethyl)-5-(3-fluoro-4-methoxyphenyl)-1H-pyrazol-1-yl) phenyl (methylidyne) ( $\lambda^1$ -oxidaneyl)-  $\lambda^6$ -sulfanamine (5c):**

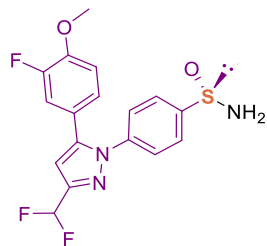

**HPLC conditions:** Chiralcel IA (*i*-PrOH/*n*-Hexane, 15:85), Flow: 1.0 mL.min<sup>-1</sup>, Temp: 25 °C.

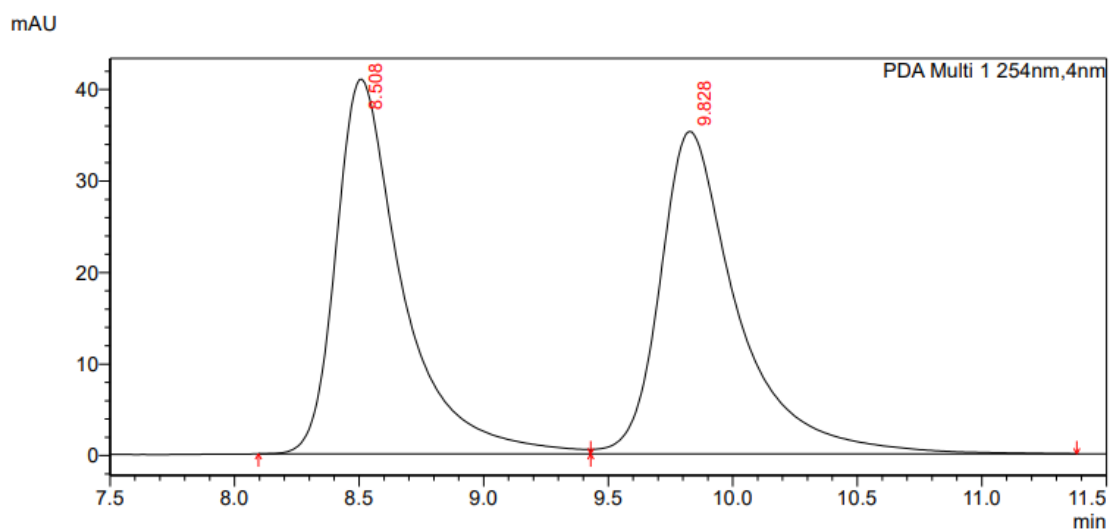

| PDA Ch1 254nm |           |         |        |         |
|---------------|-----------|---------|--------|---------|
| Peak#         | Ret. Time | Area    | Height | Area%   |
| 1             | 8.508     | 761223  | 40922  | 49.889  |
| 2             | 9.828     | 764614  | 35221  | 50.111  |
| Total         |           | 1525837 | 76142  | 100.000 |

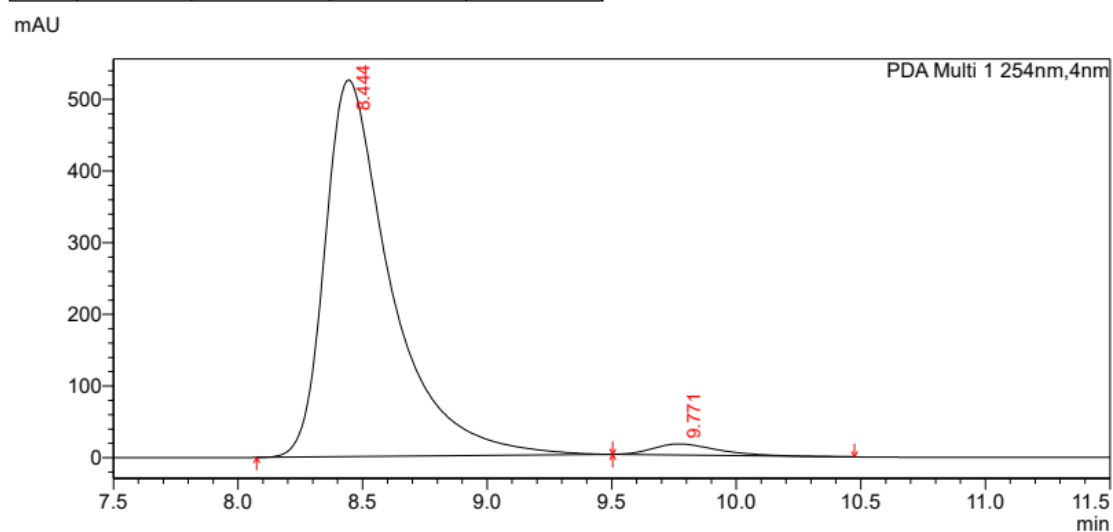

| PDA Ch1 254nm |           |         |        |         |
|---------------|-----------|---------|--------|---------|
| Peak#         | Ret. Time | Area    | Height | Area%   |
| 1             | 8.444     | 9704878 | 525650 | 97.219  |
| 2             | 9.771     | 277615  | 15422  | 2.781   |
| Total         |           | 9982493 | 541072 | 100.000 |



**(S)-N-Butyl-4-methyl Benzenesulfonamide (6):**

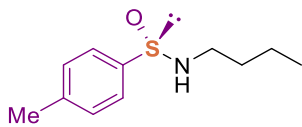

**HPLC conditions:** Chiralcel OD-H (*i*-PrOH/*n*-Hexane, 5:95), Flow: 1.0 mL.min<sup>-1</sup>, Temp: 25 °C.

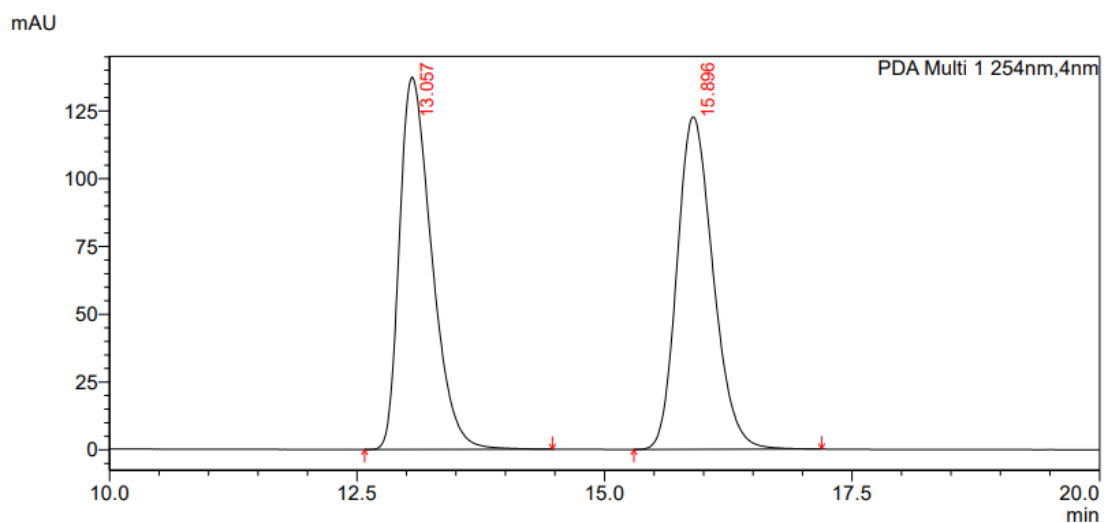

| Peak# | Ret. Time | Area    | Height | Area%   |
|-------|-----------|---------|--------|---------|
| 1     | 13.057    | 3103432 | 137343 | 49.998  |
| 2     | 15.896    | 3103695 | 122667 | 50.002  |
| Total |           | 6207127 | 260010 | 100.000 |

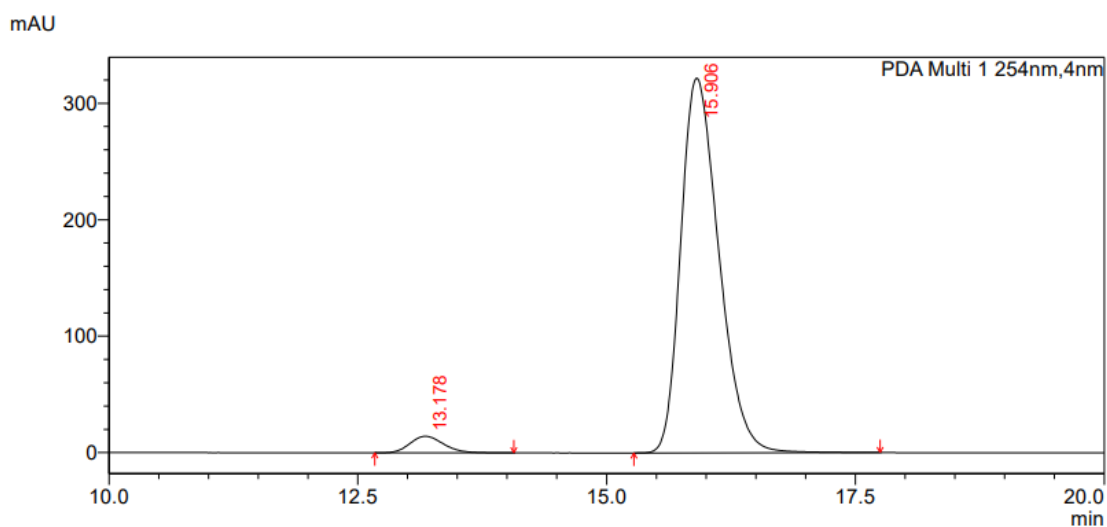

| Peak# | Ret. Time | Area    | Height | Area%   |
|-------|-----------|---------|--------|---------|
| 1     | 13.178    | 332785  | 14241  | 3.740   |
| 2     | 15.906    | 8566331 | 321768 | 96.260  |
| Total |           | 8899116 | 336009 | 100.000 |

**(S)-N-Cyclopentyl-4-methylbenzenesulfonamide (7):**

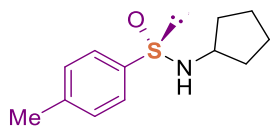

**HPLC conditions:** Chiralcel OD-H (*i*-PrOH/*n*-Hexane, 10:90), Flow: 1.0 mL.min<sup>-1</sup>, Temp: 25 °C.

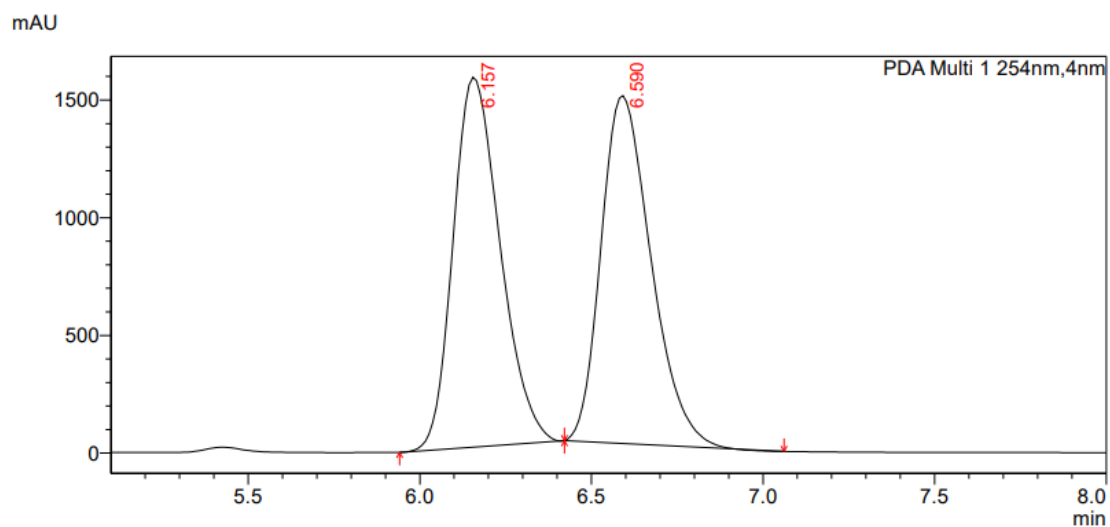

| Peak# | Ret. Time | Area     | Height  | Area%   |
|-------|-----------|----------|---------|---------|
| 1     | 6.157     | 14985075 | 1571162 | 50.020  |
| 2     | 6.590     | 14973341 | 1478315 | 49.980  |
| Total |           | 29958416 | 3049477 | 100.000 |

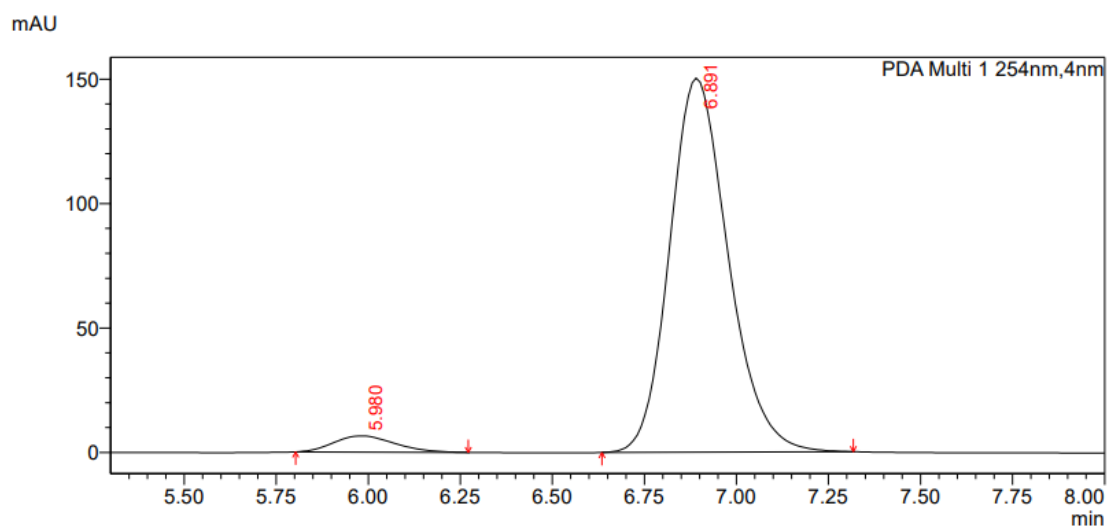

| Peak# | Ret. Time | Area    | Height | Area%   |
|-------|-----------|---------|--------|---------|
| 1     | 5.980     | 74222   | 6491   | 4.280   |
| 2     | 6.891     | 1660110 | 150240 | 95.720  |
| Total |           | 1734333 | 156731 | 100.000 |

**(S)-N-(3,7-Dimethyloct-6-en-1-yl)-4-methylbenzenesulfonamide (8):**

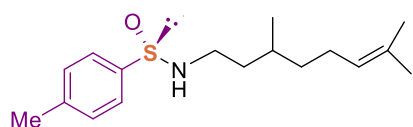

**HPLC conditions:** Chiralcel OD-H (*i*-PrOH/*n*-Hexane, 10:90), Flow: 1.0 mL.min<sup>-1</sup>,

Temp: 25 °C.

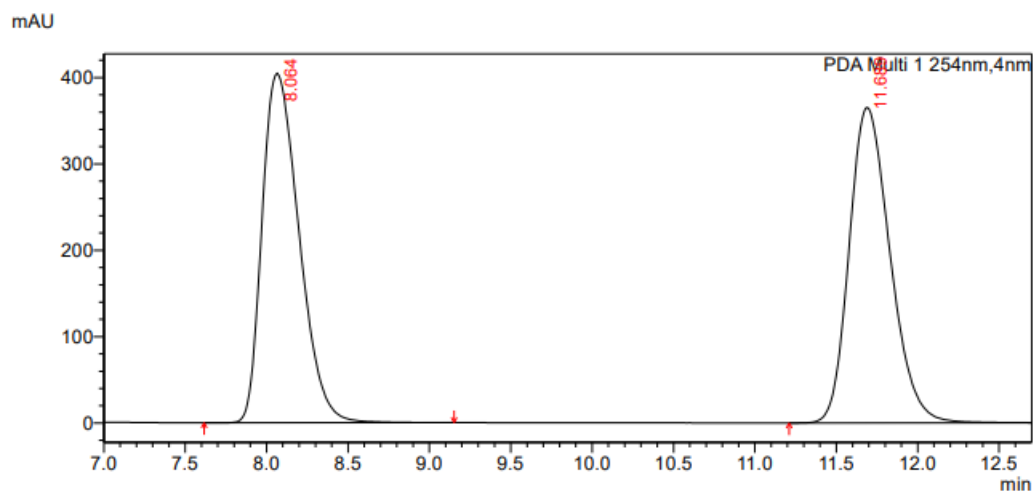

| Peak# | Ret. Time | Area     | Height | Area%   |
|-------|-----------|----------|--------|---------|
| 1     | 8.064     | 6399124  | 404590 | 50.008  |
| 2     | 11.689    | 6397045  | 365399 | 49.992  |
| Total |           | 12796169 | 769989 | 100.000 |

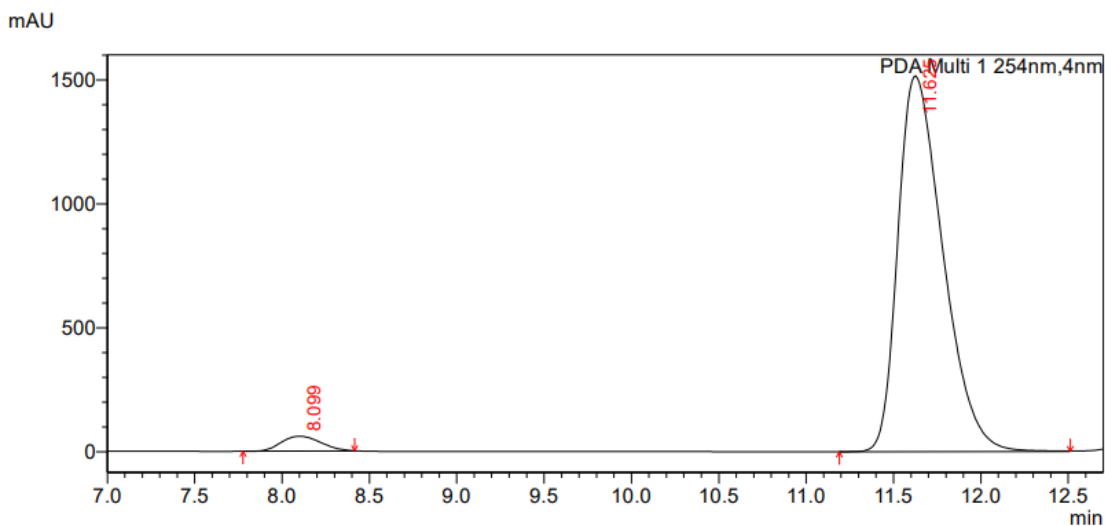

| Peak# | Ret. Time | Area     | Height  | Area%   |
|-------|-----------|----------|---------|---------|
| 1     | 8.099     | 943228   | 59990   | 3.358   |
| 2     | 11.625    | 27142309 | 1515818 | 96.642  |
| Total |           | 28085537 | 1575808 | 100.000 |

**(S)-4-Methyl-N-phenylbenzenesulfinamide (9):**

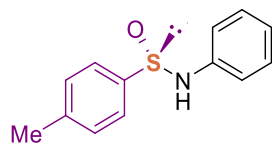

**HPLC conditions:** Chiralcel ID (*i*-PrOH/*n*-Hexane, 20:80), Flow: 1.0 mL·min<sup>-1</sup>, Temp: 25 °C.

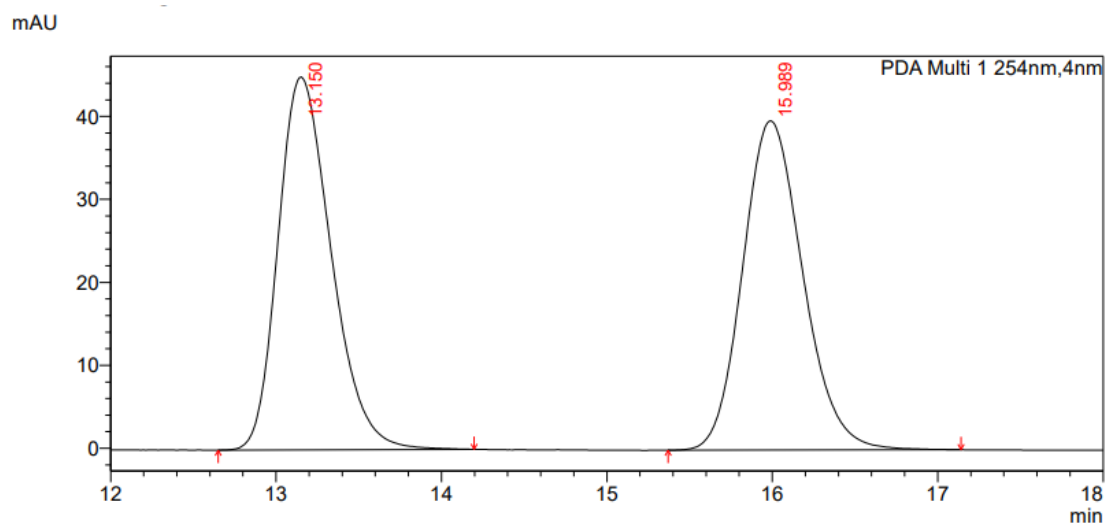

PDA Ch1 254nm

| Peak# | Ret. Time | Area    | Height | Area%   |
|-------|-----------|---------|--------|---------|
| 1     | 13.150    | 1003694 | 44934  | 49.954  |
| 2     | 15.989    | 1005543 | 39689  | 50.046  |
| Total |           | 2009237 | 84623  | 100.000 |

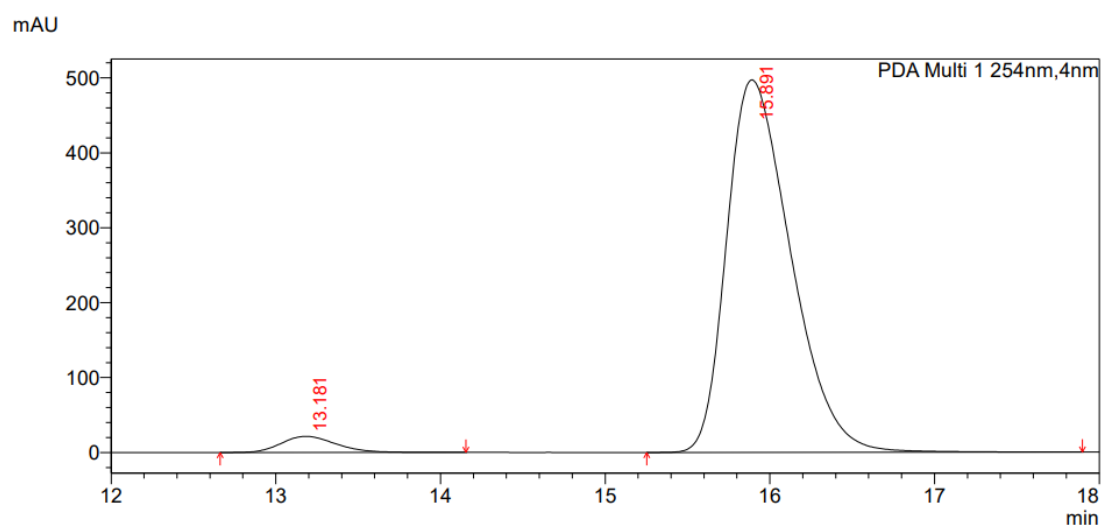

PDA Ch1 254nm

| Peak# | Ret. Time | Area     | Height | Area%   |
|-------|-----------|----------|--------|---------|
| 1     | 13.181    | 498027   | 21485  | 3.564   |
| 2     | 15.891    | 13474713 | 497311 | 96.436  |
| Total |           | 13972740 | 518796 | 100.000 |

**(S)-N-(p-Tolylsulfinyl) methacrylamide (10):**



**HPLC conditions:** Chiralcel ID (*i*-PrOH/*n*-Hexane, 10:90), Flow: 1.0 mL·min<sup>-1</sup>, Temp: 25 °C.

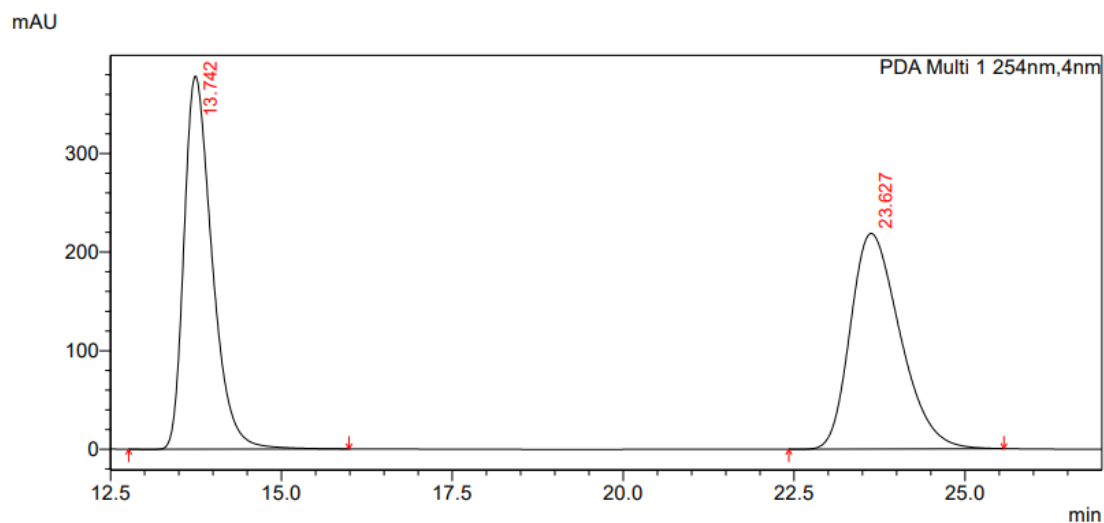

| PDA Ch1 254nm |           |          |        |         |
|---------------|-----------|----------|--------|---------|
| Peak#         | Ret. Time | Area     | Height | Area%   |
| 1             | 13.742    | 10808910 | 378313 | 49.411  |
| 2             | 23.627    | 11066739 | 218730 | 50.589  |
| Total         |           | 21875649 | 597043 | 100.000 |

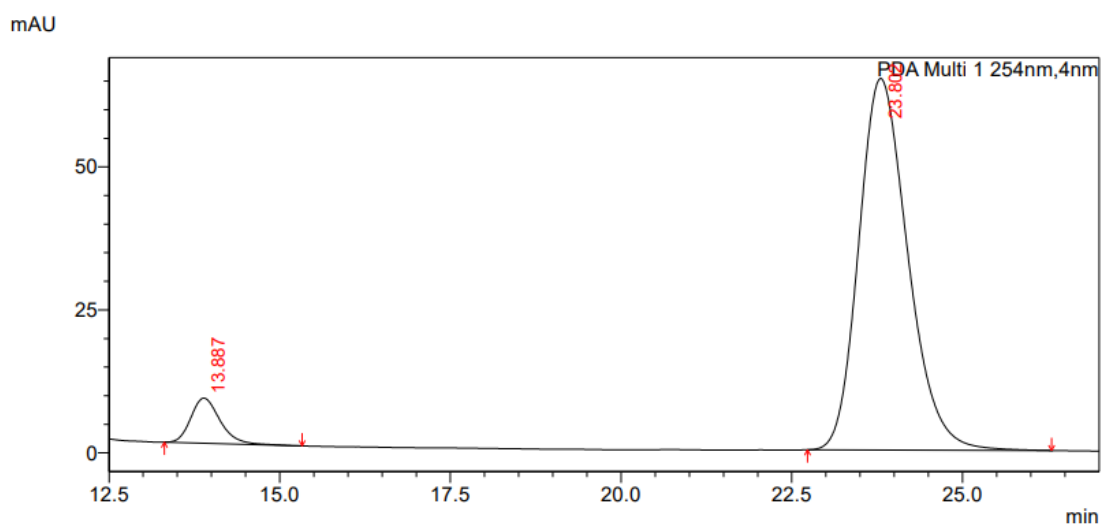

| PDA Ch1 254nm |           |         |        |         |
|---------------|-----------|---------|--------|---------|
| Peak#         | Ret. Time | Area    | Height | Area%   |
| 1             | 13.887    | 236850  | 7884   | 6.791   |
| 2             | 23.802    | 3250799 | 64957  | 93.209  |
| Total         |           | 3487649 | 72842  | 100.000 |

**(R)-N-[(S)-2,2-Dimethyl-1-phenylpropionate methyl ester]-4-methylbenzenesulfonamide (11):**

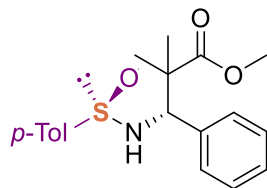

**HPLC conditions:** Chiralcel IA (*i*-PrOH/*n*-Hexane, 10:90), Flow: 1.0 mL.min<sup>-1</sup>, Temp: 25 °C.

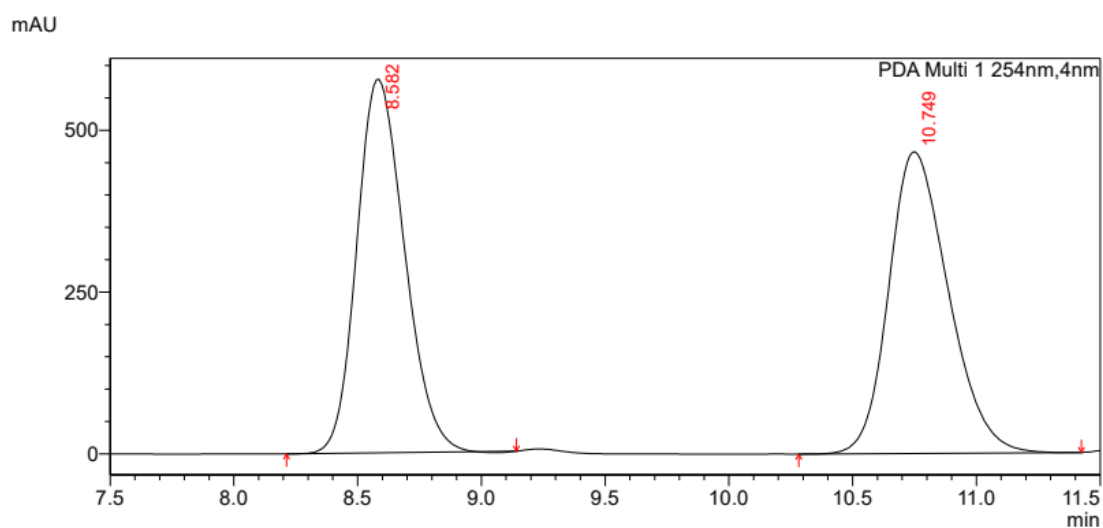

| Peak# | Ret. Time | Area     | Height  | Area%   |
|-------|-----------|----------|---------|---------|
| 1     | 8.582     | 7752411  | 577281  | 49.815  |
| 2     | 10.749    | 7810144  | 466231  | 50.185  |
| Total |           | 15562556 | 1043512 | 100.000 |

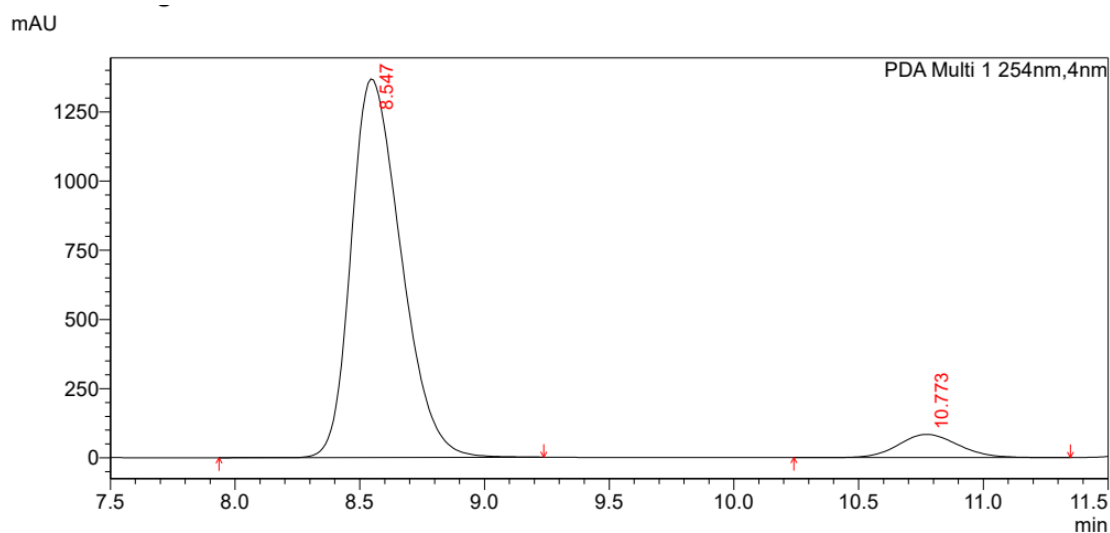

| Peak# | Ret. Time | Area     | Height  | Area%   |
|-------|-----------|----------|---------|---------|
| 1     | 8.547     | 19024778 | 1367501 | 93.163  |
| 2     | 10.773    | 1396246  | 83645   | 6.837   |
| Total |           | 20421025 | 1451146 | 100.000 |

**(S)-N-(2-(Diphenylphosphaneyl) benzyl)-4-methylbenzenesulfonamide (12):**

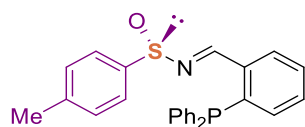

**HPLC conditions:** Chiralcel IA (*i*-PrOH/*n*-Hexane, 10:90), Flow: 1.0 mL.min<sup>-1</sup>, Temp: 25 °C.

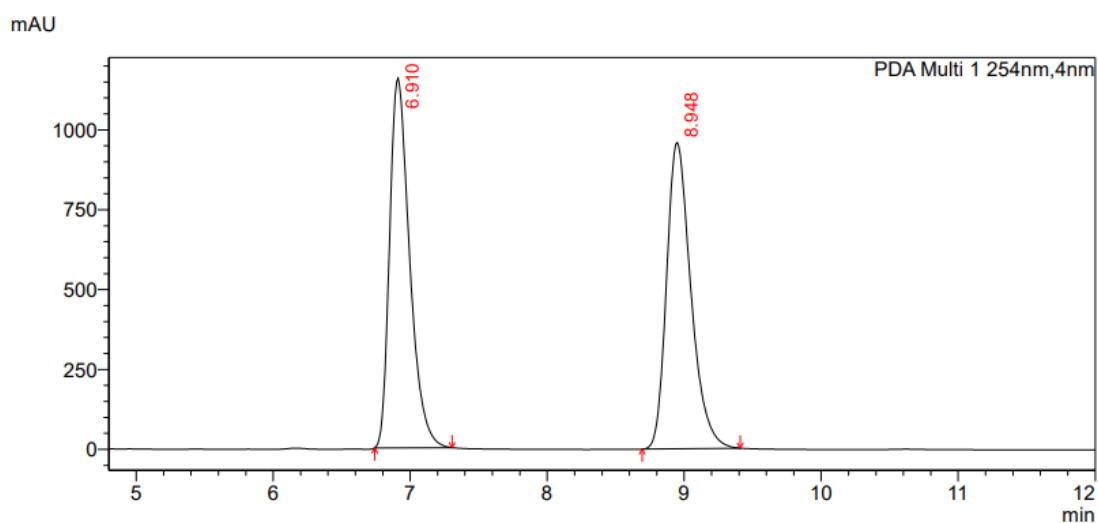

| Peak# | Ret. Time | Area     | Height  | Area%   |
|-------|-----------|----------|---------|---------|
| 1     | 6.910     | 11744455 | 1156654 | 49.804  |
| 2     | 8.948     | 11837022 | 959246  | 50.196  |
| Total |           | 23581477 | 2115899 | 100.000 |

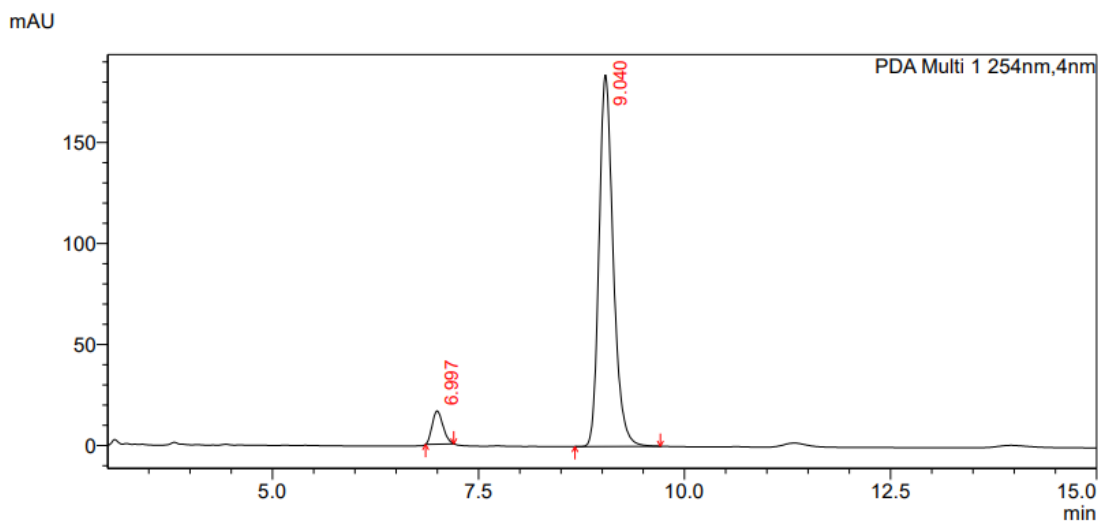

| Peak# | Ret. Time | Area    | Height | Area%   |
|-------|-----------|---------|--------|---------|
| 1     | 6.997     | 149551  | 16415  | 6.342   |
| 2     | 9.040     | 2208396 | 183789 | 93.658  |
| Total |           | 2357948 | 200204 | 100.000 |

**(S)-N-Benzoyl-1-methyl-(p-tolyl)-oxidanesulfinimidic chloride (14):**

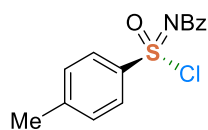

**HPLC conditions:** Chiralcel IA (*i*-PrOH/*n*-Hexane, 10:90), Flow: 1.0 mL·min<sup>-1</sup>, Temp: 25 °C.

mAU

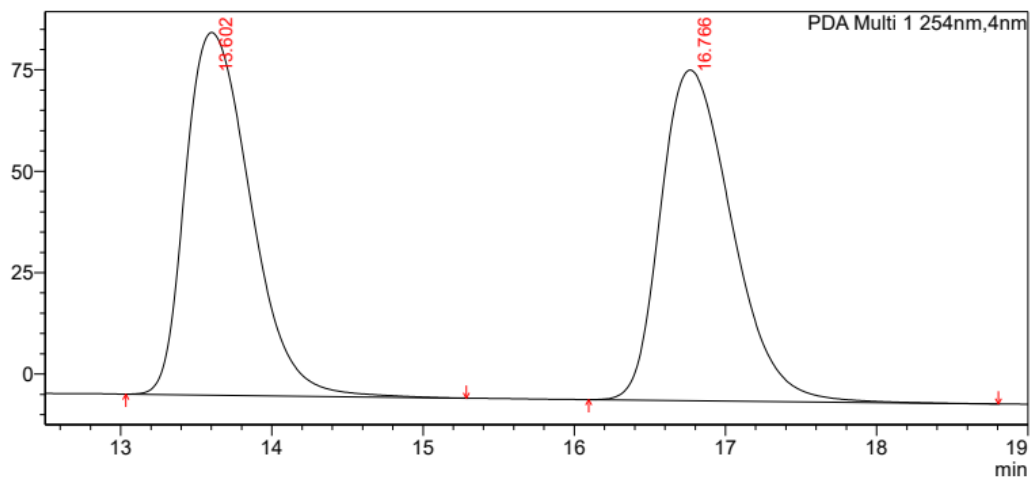

PDA Ch1 254nm

| Peak# | Ret. Time | Area    | Height | Area%   |
|-------|-----------|---------|--------|---------|
| 1     | 13.602    | 2678676 | 89394  | 50.006  |
| 2     | 16.766    | 2678030 | 81492  | 49.994  |
| Total |           | 5356707 | 170886 | 100.000 |

mAU

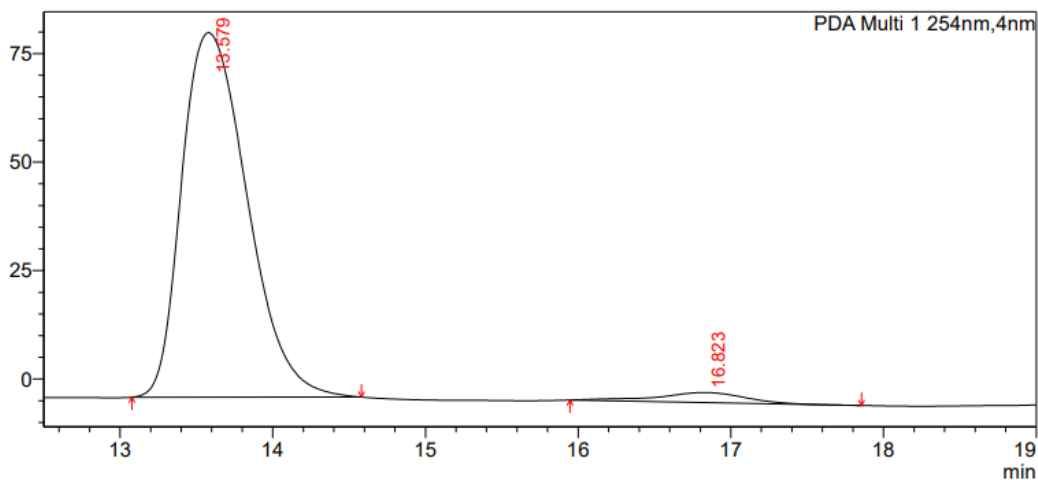

PDA Ch1 254nm

| Peak# | Ret. Time | Area    | Height | Area%   |
|-------|-----------|---------|--------|---------|
| 1     | 13.579    | 2504412 | 83999  | 96.464  |
| 2     | 16.823    | 91800   | 2295   | 3.536   |
| Total |           | 2596213 | 86293  | 100.000 |



**(S)-4-Nitrophenyl N-benzoyl-4-methylbenzenesulfonimide (15):**

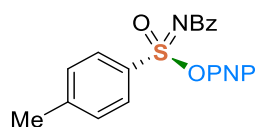

**HPLC conditions:** Chiralcel IB (*i*-PrOH/*n*-Hexane, 10:90), Flow: 1.0 mL·min<sup>-1</sup>, Temp: 25 °C.

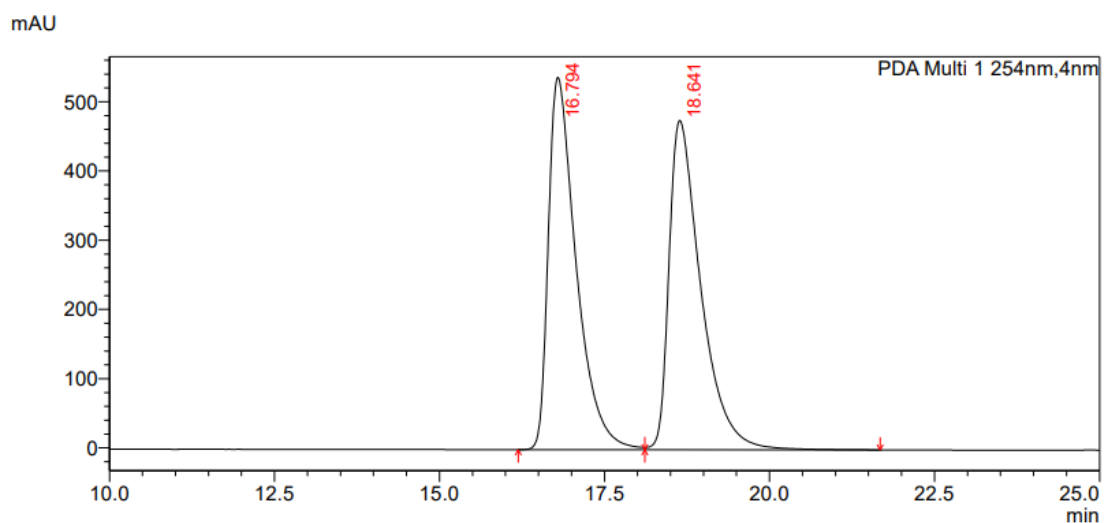

PDA Ch1 254nm

| Peak# | Ret. Time | Area     | Height  | Area%   |
|-------|-----------|----------|---------|---------|
| 1     | 16.794    | 15804655 | 537488  | 49.751  |
| 2     | 18.641    | 15963047 | 475345  | 50.249  |
| Total |           | 31767702 | 1012833 | 100.000 |

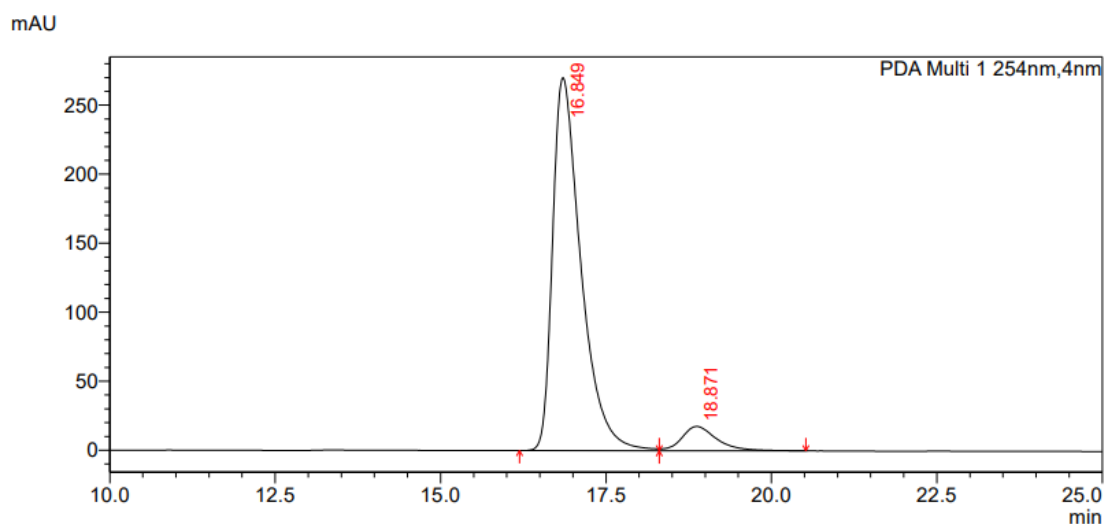

PDA Ch1 254nm

| Peak# | Ret. Time | Area    | Height | Area%   |
|-------|-----------|---------|--------|---------|
| 1     | 16.849    | 8060722 | 270158 | 92.590  |
| 2     | 18.871    | 645086  | 17619  | 7.410   |
| Total |           | 8705808 | 287778 | 100.000 |

**(S)-Phenyl N-benzoyl-4-methylbenzenesulfonimide (16):**

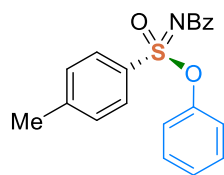

**HPLC conditions:** Chiralcel IA (*i*-PrOH/*n*-Hexane, 20:80), Flow: 1.0 mL.min<sup>-1</sup>, Temp: 25 °C.

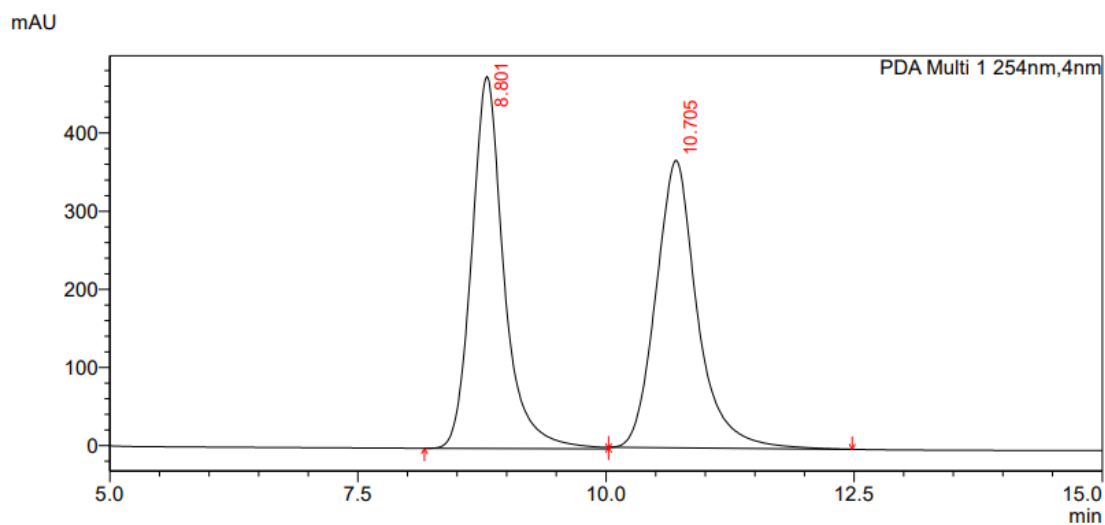

PDA Ch1 254nm

| Peak# | Ret. Time | Area     | Height | Area%   |
|-------|-----------|----------|--------|---------|
| 1     | 8.801     | 10786193 | 476111 | 50.212  |
| 2     | 10.705    | 10694950 | 368201 | 49.788  |
| Total |           | 21481143 | 844313 | 100.000 |

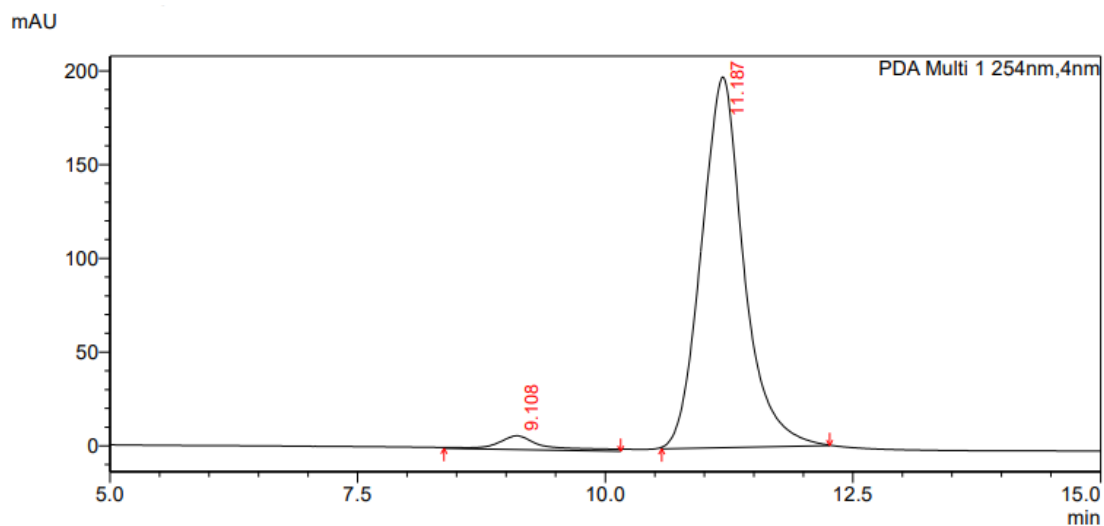

PDA Ch1 254nm

| Peak# | Ret. Time | Area    | Height | Area%   |
|-------|-----------|---------|--------|---------|
| 1     | 9.108     | 235629  | 7349   | 3.837   |
| 2     | 11.187    | 5904836 | 197668 | 96.163  |
| Total |           | 6140466 | 205017 | 100.000 |

**(S)-4-Nitrophenyl N-benzoyl-4-methylbenzenesulfonimide (17):**

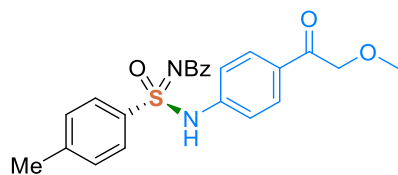

**HPLC conditions:** Chiralcel IC (*i*-PrOH/*n*-Hexane, 25:75), Flow: 1.0 mL.min<sup>-1</sup>, Temp: 25 °C.

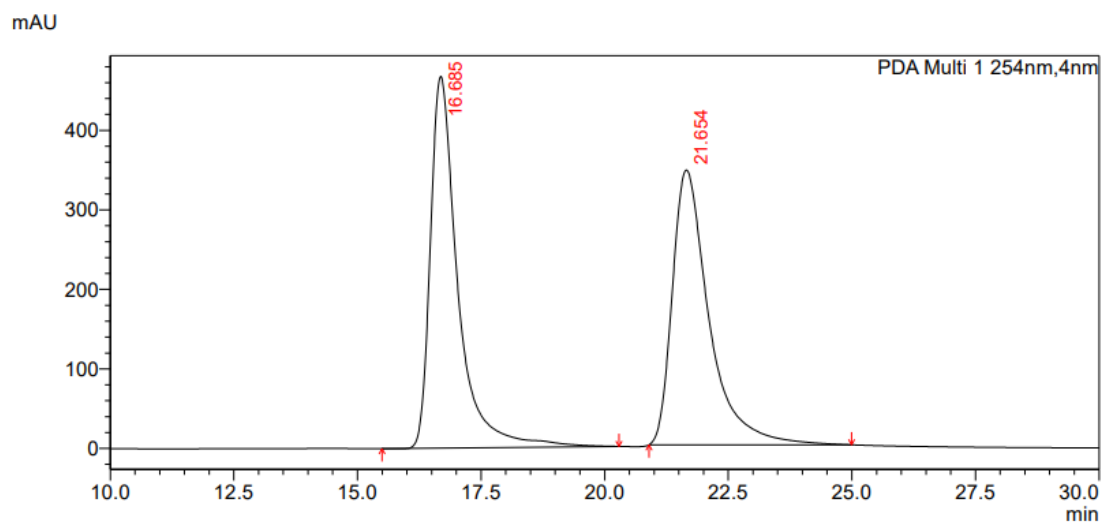

PDA Ch1 254nm

| Peak# | Ret. Time | Area     | Height | Area%   |
|-------|-----------|----------|--------|---------|
| 1     | 16.685    | 18081910 | 467409 | 50.305  |
| 2     | 21.654    | 17862467 | 345540 | 49.695  |
| Total |           | 35944377 | 812949 | 100.000 |

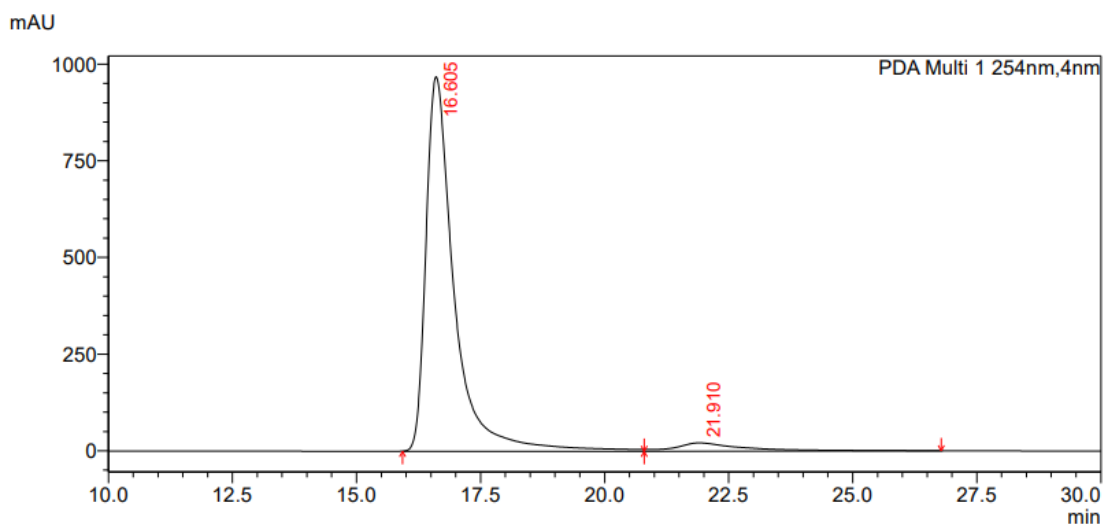

PDA Ch1 254nm

| Peak# | Ret. Time | Area     | Height | Area%   |
|-------|-----------|----------|--------|---------|
| 1     | 16.605    | 38521036 | 968262 | 94.756  |
| 2     | 21.910    | 2131736  | 21628  | 5.244   |
| Total |           | 40652772 | 989890 | 100.000 |

**(S)-N-(Oxo((1R,5R)-8-oxo-1,5,6,8-tetrahydro-2H-1,5-methanopyrido[1,2-a] [1,5] diazocin-3(4H)-yl) (*p*-tolyl)-λ<sup>6</sup>-sulfaneylidene) benzamide (18):**

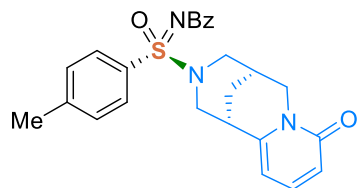

**HPLC conditions:** Chiralcel IA (*i*-PrOH/*n*-Hexane, 50:50), Flow: 1.0 mL·min<sup>-1</sup>, Temp: 25 °C.

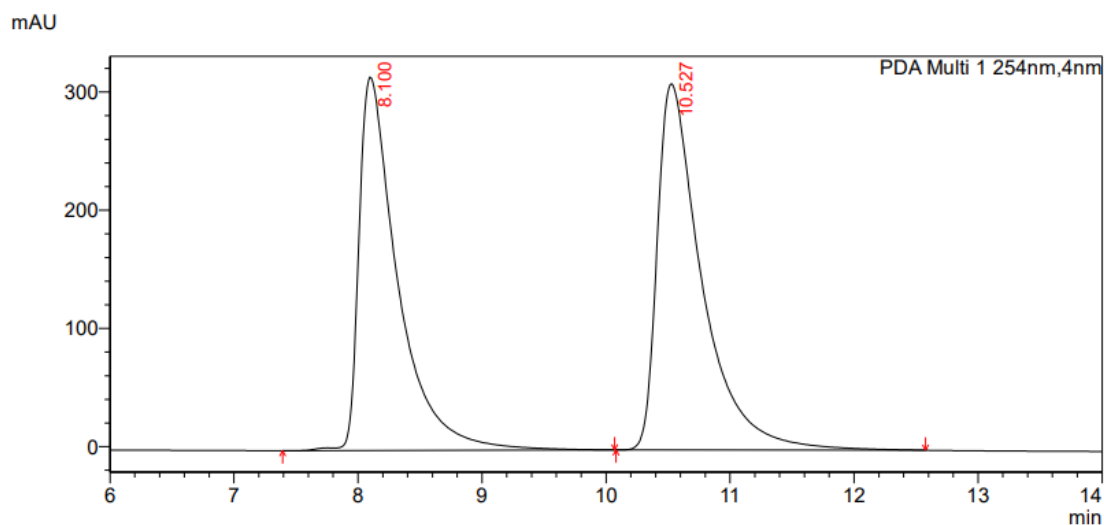

| PDA Ch1 254nm |           |          |        |         |
|---------------|-----------|----------|--------|---------|
| Peak#         | Ret. Time | Area     | Height | Area%   |
| 1             | 8.100     | 6876968  | 315771 | 46.933  |
| 2             | 10.527    | 7775820  | 309969 | 53.067  |
| Total         |           | 14652789 | 625740 | 100.000 |

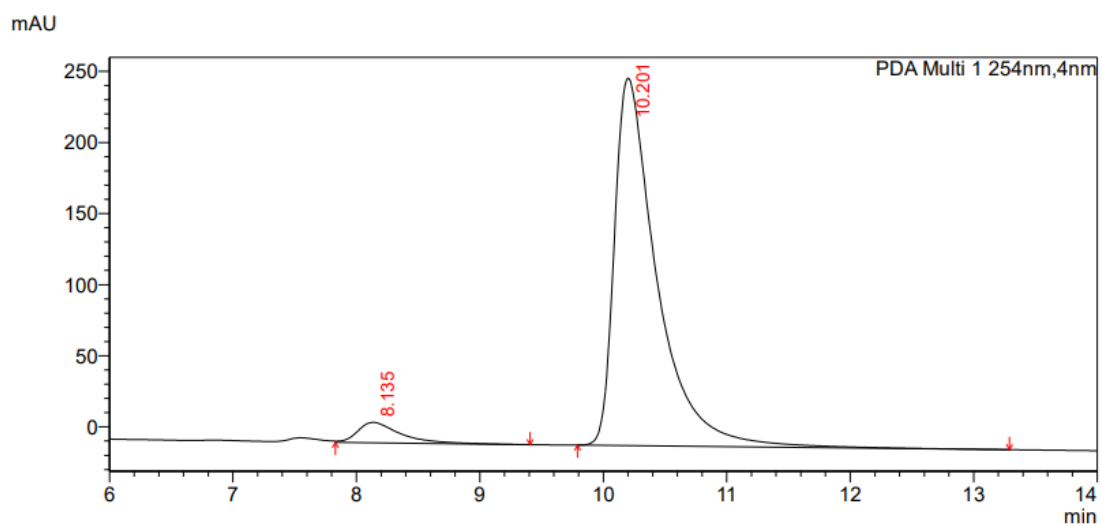

| PDA Ch1 254nm |           |         |        |         |
|---------------|-----------|---------|--------|---------|
| Peak#         | Ret. Time | Area    | Height | Area%   |
| 1             | 8.135     | 345118  | 14346  | 5.277   |
| 2             | 10.201    | 6195487 | 258424 | 94.723  |
| Total         |           | 6540605 | 272770 | 100.000 |

**(S)-3-Ethyl-5-methyl (4S)-2-((2-((N'-benzoyl-4-methylphenyl) sulfonylamidimidid amido) ethoxy) methyl)-4-(2-chlorophenyl)-6-methyl-1,4-dihydropyridine-3,5-dicarboxylate (20):**

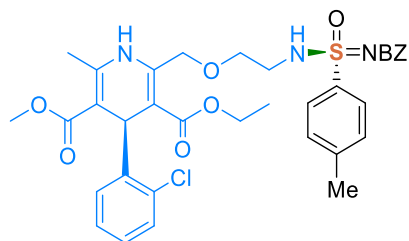

**HPLC conditions:** Chiralcel IG (*i*-PrOH/*n*-Hexane, 10:90), Flow: 1.0 mL.min<sup>-1</sup>, Temp: 25 °C.

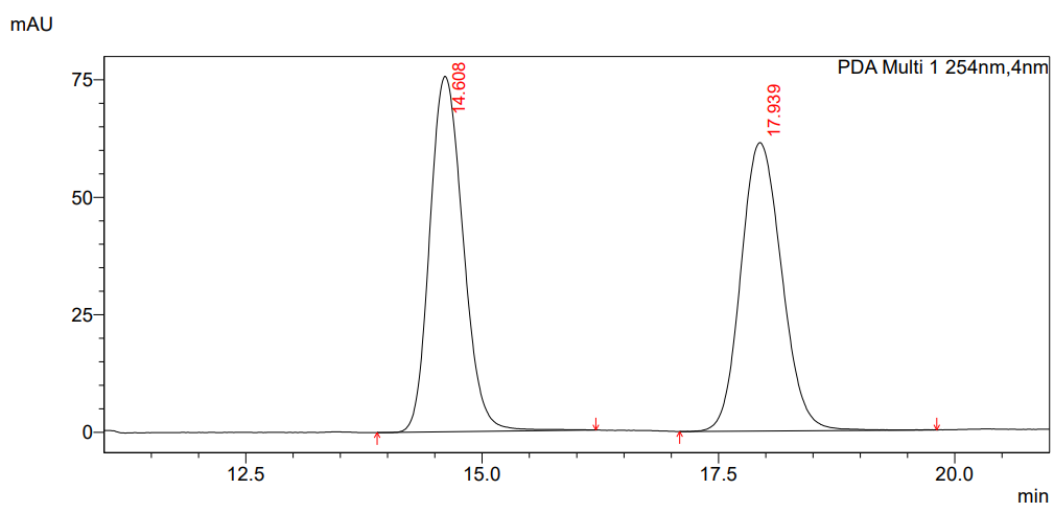

PDA Ch1 254nm

| Peak# | Ret. Time | Area    | Height | Area%   |
|-------|-----------|---------|--------|---------|
| 1     | 14.608    | 1852607 | 75622  | 50.147  |
| 2     | 17.939    | 1841726 | 61381  | 49.853  |
| Total |           | 3694333 | 137003 | 100.000 |

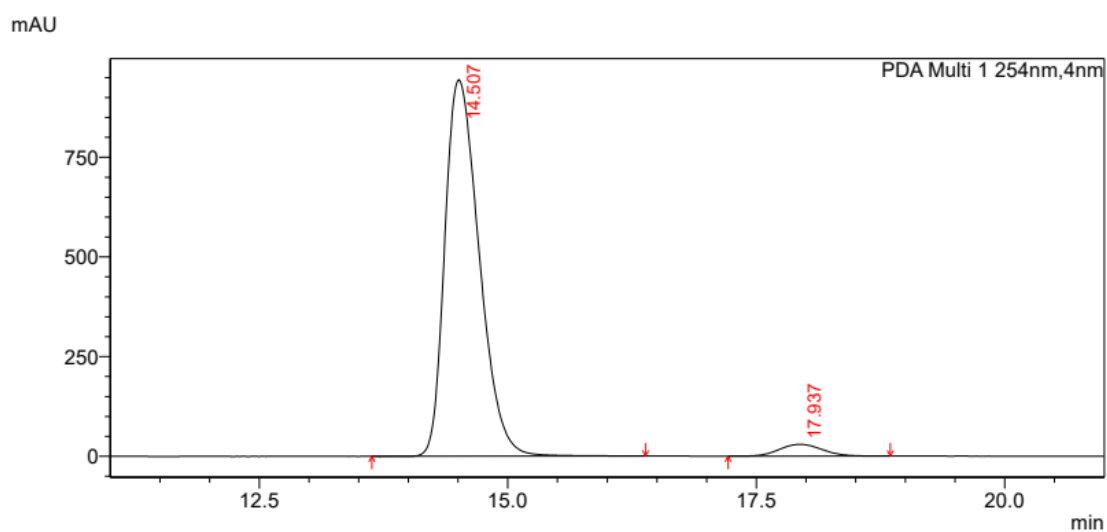

PDA Ch1 254nm

| Peak# | Ret. Time | Area     | Height | Area%   |
|-------|-----------|----------|--------|---------|
| 1     | 14.507    | 22699203 | 944476 | 96.227  |
| 2     | 17.937    | 890071   | 29520  | 3.773   |
| Total |           | 23589274 | 973996 | 100.000 |
